# Supplementary material
Source: publisher figshare collection journal article supplement (https://acs.figshare.com/ndownloader/files/7874062)
Supplement: Supplementary file 1 [file 7874062]

data_global
_audit_creation_method                  'APEX2 v2014.11-0'

_publ_requested_journal                 'Journal of the American Chemical Society'

_publ_contact_author_name               'Ryan J. Trovitch'
_publ_contact_author_address            
;
School of Molecular Sciences
Arizona State University
Tempe, AZ 85287
;
_publ_contact_author_email              'ryan.trovitch@asu.edu'
_publ_contact_author_fax                '(480) 965-2747'
_publ_contact_author_phone              '(480) 727-8930'

loop_
_publ_author_name
_publ_author_address
'Tufan K. Mukhopadhyay'
;School of Molecular Sciences
Arizona State University
Tempe, AZ 85287
;
'Christopher L. Rock'
;School of Molecular Sciences
Arizona State University
Tempe, AZ 85287
;
'Mannkyu Hong'
;Department of Chemistry
Indiana University
Bloomington, IN 47405
;
'Daniel C. Ashley'
;Department of Chemistry
Korea Advanced Institute of Science and Technology (KAIST)
Daejeon 34141, South Korea
;
'Thomas L. Groy'
;School of Molecular Sciences
Arizona State University
Tempe, AZ 85287
;
'Mu-Hyun Baik'
;Department of Chemistry
Korea Advanced Institute of Science and Technology (KAIST)
Daejeon 34141, South Korea
;
'Ryan J. Trovitch'
;School of Molecular Sciences
Arizona State University
Tempe, AZ 85287
;


_publ_section_title                     
;
Mechanistic Investigation of Bis(imino)pyridine Manganese
Catalyzed Carbonyl and Carboxylate Hydrosilylation
;
_publ_section_abstract                  
;
;
_publ_section_references                
;
;
_publ_section_comment                   
;
;

data_Ph2PPrPDIMnH
_chemical_name_systematic               ?
_chemical_name_common                   Ph2PPrPDIMnH
_chemical_formula_moiety                'C39 H42 Mn N3 P2'
_chemical_formula_sum                   'C39 H42 Mn N3 P2'
_chemical_formula_iupac                 ?
_chemical_formula_weight                669.63

_chemical_melting_point                 ?

_space_group_crystal_system             triclinic
_space_group_name_H-M_alt               'P -1'
_space_group_name_Hall                  '-P 1'
loop_
    _space_group_symop_operation_xyz
    'x, y, z'
    '-x, -y, -z'

_cell_length_a                          10.6382(4)
_cell_length_b                          17.4039(7)
_cell_length_c                          18.8993(7)
_cell_angle_alpha                       79.8920(10)
_cell_angle_beta                        87.5530(10)
_cell_angle_gamma                       77.8400(10)
_cell_volume                            3367.5(2)
_cell_formula_units_Z                   4
_cell_measurement_reflns_used           5272
_cell_measurement_theta_min             2.2379
_cell_measurement_theta_max             25.3328
_cell_measurement_temperature           123.00(10)

_exptl_crystal_description              block
_exptl_crystal_colour                   'clear dark brown-green'
_exptl_crystal_size_max                 0.200
_exptl_crystal_size_mid                 0.090
_exptl_crystal_size_min                 0.075
_exptl_crystal_density_diffrn           1.321
_exptl_crystal_density_meas             ?
_exptl_crystal_density_method           'not measured'
_exptl_crystal_F_000                    1408

_exptl_absorpt_coefficient_mu           0.520
_exptl_absorpt_correction_type          multi-scan
_exptl_absorpt_process_details          'SADABS V2014/5 (Bruker AXS Inc.)'
_exptl_absorpt_correction_T_min         0.88
_exptl_absorpt_correction_T_max         0.96

_exptl_special_details                  
;
; 

_diffrn_ambient_temperature             123.00(10)

_diffrn_source                          'fine-focus sealed tube'
_diffrn_source_type                     'sealed tube'

_diffrn_radiation_type                  MoK\a
_diffrn_radiation_wavelength            0.71073
_diffrn_radiation_monochromator         graphite

_diffrn_measurement_device_type         'Bruker Smart APEX Diffractometer'
_diffrn_measurement_method              '\w and \f scans'

_diffrn_detector_area_resol_mean        8.3330

_diffrn_reflns_number                   28219
_diffrn_reflns_av_R_equivalents         0.0392
_diffrn_reflns_av_unetI/netI            0.0563
_diffrn_reflns_theta_min                2.08
_diffrn_reflns_theta_max                25.37
_diffrn_reflns_theta_full               25.37
_diffrn_measured_fraction_theta_max     0.999
_diffrn_measured_fraction_theta_full    0.999
_diffrn_reflns_limit_h_min              -12
_diffrn_reflns_limit_h_max              12
_diffrn_reflns_limit_k_min              -20
_diffrn_reflns_limit_k_max              20
_diffrn_reflns_limit_l_min              -22
_diffrn_reflns_limit_l_max              22

_refine_special_details                 
;
;

_reflns_number_total                    12336
_reflns_number_gt                       9258
_reflns_threshold_expression            'I > 2\s(I)'

_refine_ls_structure_factor_coef        Fsqd
_refine_ls_matrix_type                  full
_refine_ls_R_factor_all                 0.0641
_refine_ls_R_factor_gt                  0.0416
_refine_ls_wR_factor_gt                 0.0883
_refine_ls_wR_factor_ref                0.0967
_refine_ls_goodness_of_fit_ref          1.029
_refine_ls_restrained_S_all             1.029
_refine_ls_number_reflns                12336
_refine_ls_number_parameters            823
_refine_ls_number_restraints            0
_refine_ls_number_constraints           ?
_refine_ls_hydrogen_treatment           mixed
_refine_ls_weighting_scheme             calc
_refine_ls_weighting_details            
    'w=1/[\s^2^(Fo^2^)+(0.0407P)^2^+0.9990P] where P=(Fo^2^+2Fc^2^)/3'

_atom_sites_solution_hydrogens          geom
_atom_sites_solution_primary            direct
_atom_sites_solution_secondary          difmap

_refine_ls_shift/su_max                 0.001
_refine_ls_shift/su_mean                0.000
_refine_diff_density_max                0.376
_refine_diff_density_min                -0.447
_refine_ls_extinction_method            none
_refine_ls_extinction_coef              ?

loop_
    _atom_type_symbol
    _atom_type_description
    _atom_type_scat_dispersion_real
    _atom_type_scat_dispersion_imag
    _atom_type_scat_source
    C C 0.0033 0.0016 'International Tables Vol C Tables 4.2.6.8 and 6.1.1.4'
    H H 0.0000 0.0000 'International Tables Vol C Tables 4.2.6.8 and 6.1.1.4'
    N N 0.0061 0.0033 'International Tables Vol C Tables 4.2.6.8 and 6.1.1.4'
    P P 0.1023 0.0942 'International Tables Vol C Tables 4.2.6.8 and 6.1.1.4'
    Mn Mn 0.3368 0.7283
     'International Tables Vol C Tables 4.2.6.8 and 6.1.1.4'

_computing_data_collection              
    'Bruker Instrument Service v2015.5.1.3'
_computing_cell_refinement              'SAINT V8.34A (Bruker AXS Inc., 2014)'
_computing_data_reduction               'SAINT V8.34A (Bruker AXS Inc., 2014)'
_computing_structure_solution           'SHELXTL XT-2014/4'
_computing_structure_refinement         'SHELXL-2014/7 (Sheldrick, 2014)'
_computing_molecular_graphics           'XShell ver. 6.3.1 (Bruker AXS, 2004)'
_computing_publication_material         
    'Bruker APEX2 v2014.11-0 (Bruker-AXS, 2014)'

loop_
    _atom_site_type_symbol
    _atom_site_label
    _atom_site_fract_x
    _atom_site_fract_y
    _atom_site_fract_z
    _atom_site_U_iso_or_equiv
    _atom_site_adp_type
    _atom_site_calc_flag
    _atom_site_refinement_flags_adp
    _atom_site_refinement_flags_occupancy
    _atom_site_refinement_flags_posn
    _atom_site_occupancy
    _atom_site_disorder_assembly
    _atom_site_disorder_group
    Mn Mn1 0.83448(4) 0.74231(2) 0.37704(2) 0.01828(10) Uani d . . . 1 . .
    P P1 0.76947(6) 0.85074(4) 0.42525(4) 0.01993(15) Uani d . . . 1 . .
    P P2 0.73381(6) 0.64131(4) 0.39208(4) 0.01824(15) Uani d . . . 1 . .
    N N1 0.9655(2) 0.70934(12) 0.45114(11) 0.0225(5) Uani d . . . 1 . .
    N N2 0.98280(19) 0.74264(12) 0.32126(11) 0.0182(5) Uani d . . . 1 . .
    N N3 0.76025(19) 0.77638(12) 0.28142(11) 0.0192(5) Uani d . . . 1 . .
    C C1 1.2011(3) 0.69359(18) 0.47970(16) 0.0360(7) Uani d . . . 1 . .
    H H1A 1.186 0.7331 0.5119 0.054 Uiso calc U . R 1 . .
    H H1B 1.2795 0.6979 0.4514 0.054 Uiso calc U . R 1 . .
    H H1C 1.2112 0.6399 0.5082 0.054 Uiso calc U . R 1 . .
    C C2 1.0886(2) 0.70870(15) 0.42995(14) 0.0247(6) Uani d . . . 1 . .
    C C3 1.1018(2) 0.72768(15) 0.35395(14) 0.0225(6) Uani d . . . 1 . .
    C C4 1.2113(2) 0.73620(15) 0.31218(15) 0.0273(6) Uani d . . . 1 . .
    H H4 1.293 0.7262 0.3343 0.033 Uiso calc U . R 1 . .
    C C5 1.2002(3) 0.75925(15) 0.23836(15) 0.0259(6) Uani d . . . 1 . .
    H H5 1.2745 0.7659 0.2102 0.031 Uiso calc U . R 1 . .
    C C6 1.0820(2) 0.77272(15) 0.20505(15) 0.0244(6) Uani d . . . 1 . .
    H H6 1.0754 0.7872 0.1543 0.029 Uiso calc U . R 1 . .
    C C7 0.9731(2) 0.76475(14) 0.24686(13) 0.0193(5) Uani d . . . 1 . .
    C C8 0.8427(2) 0.77999(14) 0.22573(13) 0.0203(6) Uani d . . . 1 . .
    C C9 0.8025(3) 0.79687(17) 0.14818(14) 0.0279(6) Uani d . . . 1 . .
    H H9A 0.7525 0.7581 0.1398 0.042 Uiso calc U . R 1 . .
    H H9B 0.8791 0.7927 0.1173 0.042 Uiso calc U . R 1 . .
    H H9C 0.7497 0.8508 0.137 0.042 Uiso calc U . R 1 . .
    C C10 0.9376(3) 0.69861(16) 0.52863(14) 0.0282(6) Uani d . . . 1 . .
    H H10A 1.0148 0.667 0.5553 0.034 Uiso calc U . R 1 . .
    H H10B 0.8674 0.6688 0.5392 0.034 Uiso calc U . R 1 . .
    C C11 0.8979(3) 0.77917(16) 0.55343(14) 0.0281(6) Uani d . . . 1 . .
    H H11A 0.9651 0.8105 0.5383 0.034 Uiso calc U . R 1 . .
    H H11B 0.8938 0.7701 0.6066 0.034 Uiso calc U . R 1 . .
    C C12 0.7683(3) 0.82823(17) 0.52397(14) 0.0279(6) Uani d . . . 1 . .
    H H12A 0.7482 0.8788 0.5433 0.033 Uiso calc U . R 1 . .
    H H12B 0.7 0.7982 0.5403 0.033 Uiso calc U . R 1 . .
    C C13 0.8627(2) 0.93041(15) 0.40990(13) 0.0200(6) Uani d . . . 1 . .
    C C14 0.8312(3) 0.99656(16) 0.44416(15) 0.0287(6) Uani d . . . 1 . .
    H H14 0.7617 1.0003 0.4776 0.034 Uiso calc U . R 1 . .
    C C15 0.8994(3) 1.05693(16) 0.43031(15) 0.0307(7) Uani d . . . 1 . .
    H H15 0.8774 1.1016 0.4543 0.037 Uiso calc U . R 1 . .
    C C16 0.9996(3) 1.05208(16) 0.38152(15) 0.0304(7) Uani d . . . 1 . .
    H H16 1.0469 1.0934 0.3719 0.037 Uiso calc U . R 1 . .
    C C17 1.0313(3) 0.98735(17) 0.34677(15) 0.0307(7) Uani d . . . 1 . .
    H H17 1.0999 0.9843 0.3129 0.037 Uiso calc U . R 1 . .
    C C18 0.9631(2) 0.92657(16) 0.36122(14) 0.0241(6) Uani d . . . 1 . .
    H H18 0.9859 0.8819 0.3373 0.029 Uiso calc U . R 1 . .
    C C19 0.6093(2) 0.91018(15) 0.40106(14) 0.0225(6) Uani d . . . 1 . .
    C C20 0.4977(3) 0.88927(18) 0.43234(16) 0.0319(7) Uani d . . . 1 . .
    H H20 0.5037 0.8462 0.4715 0.038 Uiso calc U . R 1 . .
    C C21 0.3773(3) 0.9310(2) 0.40659(17) 0.0393(8) Uani d . . . 1 . .
    H H21 0.3016 0.9161 0.428 0.047 Uiso calc U . R 1 . .
    C C22 0.3679(3) 0.99401(19) 0.35003(17) 0.0389(8) Uani d . . . 1 . .
    H H22 0.2857 1.0232 0.3333 0.047 Uiso calc U . R 1 . .
    C C23 0.4771(3) 1.01459(17) 0.31797(16) 0.0339(7) Uani d . . . 1 . .
    H H23 0.4704 1.0573 0.2784 0.041 Uiso calc U . R 1 . .
    C C24 0.5965(3) 0.97338(16) 0.34311(15) 0.0286(6) Uani d . . . 1 . .
    H H24 0.6715 0.9882 0.3206 0.034 Uiso calc U . R 1 . .
    C C25 0.6230(2) 0.79127(15) 0.26565(14) 0.0212(6) Uani d . . . 1 . .
    H H25A 0.6074 0.8207 0.216 0.025 Uiso calc U . R 1 . .
    H H25B 0.5742 0.825 0.2988 0.025 Uiso calc U . R 1 . .
    C C26 0.5746(2) 0.71348(15) 0.27354(14) 0.0230(6) Uani d . . . 1 . .
    H H26A 0.4865 0.7252 0.2539 0.028 Uiso calc U . R 1 . .
    H H26B 0.6304 0.6774 0.2447 0.028 Uiso calc U . R 1 . .
    C C27 0.5729(2) 0.67084(15) 0.35134(14) 0.0220(6) Uani d . . . 1 . .
    H H27A 0.5366 0.6227 0.3529 0.026 Uiso calc U . R 1 . .
    H H27B 0.5159 0.7065 0.3801 0.026 Uiso calc U . R 1 . .
    C C28 0.8019(2) 0.55225(15) 0.35167(13) 0.0201(6) Uani d . . . 1 . .
    C C29 0.7347(3) 0.49156(16) 0.35030(15) 0.0278(6) Uani d . . . 1 . .
    H H29 0.6508 0.4955 0.3707 0.033 Uiso calc U . R 1 . .
    C C30 0.7894(3) 0.42594(16) 0.31958(15) 0.0297(7) Uani d . . . 1 . .
    H H30 0.7424 0.3855 0.318 0.036 Uiso calc U . R 1 . .
    C C31 0.9120(3) 0.41867(16) 0.29112(15) 0.0295(7) Uani d . . . 1 . .
    H H31 0.9494 0.3735 0.27 0.035 Uiso calc U . R 1 . .
    C C32 0.9799(3) 0.47731(17) 0.29355(16) 0.0356(7) Uani d . . . 1 . .
    H H32 1.0653 0.4718 0.2752 0.043 Uiso calc U . R 1 . .
    C C33 0.9239(3) 0.54454(16) 0.32268(15) 0.0288(6) Uani d . . . 1 . .
    H H33 0.9704 0.5856 0.3226 0.035 Uiso calc U . R 1 . .
    C C34 0.6990(3) 0.59475(15) 0.48348(14) 0.0228(6) Uani d . . . 1 . .
    C C35 0.5957(3) 0.63018(18) 0.52236(15) 0.0324(7) Uani d . . . 1 . .
    H H35 0.5388 0.677 0.4999 0.039 Uiso calc U . R 1 . .
    C C36 0.5742(3) 0.5986(2) 0.59306(17) 0.0438(8) Uani d . . . 1 . .
    H H36 0.5029 0.6236 0.6186 0.053 Uiso calc U . R 1 . .
    C C37 0.6552(4) 0.5315(2) 0.62628(17) 0.0505(9) Uani d . . . 1 . .
    H H37 0.64 0.5098 0.6749 0.061 Uiso calc U . R 1 . .
    C C38 0.7585(4) 0.49540(19) 0.58943(17) 0.0464(9) Uani d . . . 1 . .
    H H38 0.8148 0.4488 0.6127 0.056 Uiso calc U . R 1 . .
    C C39 0.7813(3) 0.52666(16) 0.51795(15) 0.0319(7) Uani d . . . 1 . .
    H H39 0.853 0.5014 0.4928 0.038 Uiso calc U . R 1 . .
    Mn Mn2 0.50889(4) 0.74909(2) 0.87387(2) 0.01751(10) Uani d . . . 1 . .
    P P3 0.50095(6) 0.86028(4) 0.91692(3) 0.01757(15) Uani d . . . 1 . .
    P P4 0.66811(6) 0.64390(4) 0.88036(4) 0.01816(15) Uani d . . . 1 . .
    N N4 0.4140(2) 0.71934(12) 0.96152(11) 0.0215(5) Uani d . . . 1 . .
    N N5 0.34937(19) 0.75080(12) 0.83605(11) 0.0190(5) Uani d . . . 1 . .
    N N6 0.54316(19) 0.77692(12) 0.77150(11) 0.0185(5) Uani d . . . 1 . .
    C C40 0.1963(3) 0.70625(18) 1.01527(15) 0.0348(7) Uani d . . . 1 . .
    H H40A 0.216 0.6499 1.0376 0.052 Uiso calc U . R 1 . .
    H H40B 0.1081 0.7203 0.9969 0.052 Uiso calc U . R 1 . .
    H H40C 0.2046 0.7393 1.0511 0.052 Uiso calc U . R 1 . .
    C C41 0.2886(2) 0.72049(15) 0.95410(14) 0.0239(6) Uani d . . . 1 . .
    C C42 0.2469(2) 0.73898(15) 0.88166(14) 0.0219(6) Uani d . . . 1 . .
    C C43 0.1247(3) 0.74739(16) 0.85408(16) 0.0298(7) Uani d . . . 1 . .
    H H43 0.0547 0.7394 0.8854 0.036 Uiso calc U . R 1 . .
    C C44 0.1058(3) 0.76765(16) 0.77983(16) 0.0313(7) Uani d . . . 1 . .
    H H44 0.0224 0.7736 0.7608 0.038 Uiso calc U . R 1 . .
    C C45 0.2073(3) 0.77905(16) 0.73401(15) 0.0269(6) Uani d . . . 1 . .
    H H45 0.1938 0.7925 0.6836 0.032 Uiso calc U . R 1 . .
    C C46 0.3301(2) 0.77084(14) 0.76181(14) 0.0214(6) Uani d . . . 1 . .
    C C47 0.4461(2) 0.78296(15) 0.72606(13) 0.0208(6) Uani d . . . 1 . .
    C C48 0.4549(3) 0.80048(17) 0.64525(14) 0.0302(7) Uani d . . . 1 . .
    H H48A 0.4708 0.8544 0.63 0.045 Uiso calc U . R 1 . .
    H H48B 0.3739 0.7968 0.6246 0.045 Uiso calc U . R 1 . .
    H H48C 0.5255 0.7617 0.6286 0.045 Uiso calc U . R 1 . .
    C C49 0.4669(3) 0.70639(16) 1.03407(14) 0.0260(6) Uani d . . . 1 . .
    H H49A 0.5578 0.6777 1.034 0.031 Uiso calc U . R 1 . .
    H H49B 0.4183 0.6729 1.0677 0.031 Uiso calc U . R 1 . .
    C C50 0.4589(3) 0.78588(16) 1.05960(14) 0.0268(6) Uani d . . . 1 . .
    H H50A 0.4893 0.7752 1.1099 0.032 Uiso calc U . R 1 . .
    H H50B 0.3678 0.8142 1.0592 0.032 Uiso calc U . R 1 . .
    C C51 0.5384(2) 0.84046(16) 1.01344(13) 0.0235(6) Uani d . . . 1 . .
    H H51A 0.6308 0.8156 1.0198 0.028 Uiso calc U . R 1 . .
    H H51B 0.5235 0.8919 1.0312 0.028 Uiso calc U . R 1 . .
    C C52 0.6094(2) 0.92752(15) 0.88173(13) 0.0190(5) Uani d . . . 1 . .
    C C53 0.5659(3) 1.00783(15) 0.85422(13) 0.0221(6) Uani d . . . 1 . .
    H H53 0.4764 1.0301 0.8544 0.026 Uiso calc U . R 1 . .
    C C54 0.6514(3) 1.05602(16) 0.82648(14) 0.0256(6) Uani d . . . 1 . .
    H H54 0.6199 1.1107 0.8075 0.031 Uiso calc U . R 1 . .
    C C55 0.7821(3) 1.02477(16) 0.82644(14) 0.0263(6) Uani d . . . 1 . .
    H H55 0.8405 1.0578 0.8077 0.032 Uiso calc U . R 1 . .
    C C56 0.8271(3) 0.94515(16) 0.85379(15) 0.0293(7) Uani d . . . 1 . .
    H H56 0.9168 0.9233 0.8541 0.035 Uiso calc U . R 1 . .
    C C57 0.7416(2) 0.89728(16) 0.88078(15) 0.0261(6) Uani d . . . 1 . .
    H H57 0.7737 0.8425 0.8991 0.031 Uiso calc U . R 1 . .
    C C58 0.3427(2) 0.92812(14) 0.91107(13) 0.0191(5) Uani d . . . 1 . .
    C C59 0.2763(2) 0.94046(15) 0.84662(14) 0.0211(6) Uani d . . . 1 . .
    H H59 0.3147 0.9154 0.808 0.025 Uiso calc U . R 1 . .
    C C60 0.1548(3) 0.98909(16) 0.83856(15) 0.0270(6) Uani d . . . 1 . .
    H H60 0.1108 0.998 0.7942 0.032 Uiso calc U . R 1 . .
    C C61 0.0975(3) 1.02463(16) 0.89490(16) 0.0291(7) Uani d . . . 1 . .
    H H61 0.0139 1.0576 0.8894 0.035 Uiso calc U . R 1 . .
    C C62 0.1610(3) 1.01253(16) 0.95899(15) 0.0276(6) Uani d . . . 1 . .
    H H62 0.1208 1.0368 0.9977 0.033 Uiso calc U . R 1 . .
    C C63 0.2837(2) 0.96493(15) 0.96736(14) 0.0236(6) Uani d . . . 1 . .
    H H63 0.3277 0.9574 1.0116 0.028 Uiso calc U . R 1 . .
    C C64 0.6703(2) 0.78389(15) 0.74020(14) 0.0226(6) Uani d . . . 1 . .
    H H64A 0.7082 0.8186 0.7657 0.027 Uiso calc U . R 1 . .
    H H64B 0.6599 0.8094 0.6891 0.027 Uiso calc U . R 1 . .
    C C65 0.7615(2) 0.70277(15) 0.74533(14) 0.0243(6) Uani d . . . 1 . .
    H H65A 0.8386 0.709 0.7154 0.029 Uiso calc U . R 1 . .
    H H65B 0.7184 0.6661 0.7255 0.029 Uiso calc U . R 1 . .
    C C66 0.8043(2) 0.66516(15) 0.82235(14) 0.0232(6) Uani d . . . 1 . .
    H H66A 0.8465 0.7019 0.8427 0.028 Uiso calc U . R 1 . .
    H H66B 0.8682 0.6149 0.8215 0.028 Uiso calc U . R 1 . .
    C C67 0.6396(2) 0.55539(15) 0.84756(13) 0.0216(6) Uani d . . . 1 . .
    C C68 0.5149(3) 0.55227(16) 0.83075(14) 0.0263(6) Uani d . . . 1 . .
    H H68 0.4461 0.5956 0.836 0.032 Uiso calc U . R 1 . .
    C C69 0.4906(3) 0.48625(16) 0.80630(15) 0.0306(7) Uani d . . . 1 . .
    H H69 0.405 0.4839 0.7959 0.037 Uiso calc U . R 1 . .
    C C70 0.5908(3) 0.42381(16) 0.79707(14) 0.0311(7) Uani d . . . 1 . .
    H H70 0.5741 0.3789 0.7798 0.037 Uiso calc U . R 1 . .
    C C71 0.7152(3) 0.42653(16) 0.81283(14) 0.0298(7) Uani d . . . 1 . .
    H H71 0.7841 0.3838 0.8059 0.036 Uiso calc U . R 1 . .
    C C72 0.7393(3) 0.49149(15) 0.83870(14) 0.0263(6) Uani d . . . 1 . .
    H H72 0.8246 0.4926 0.8506 0.032 Uiso calc U . R 1 . .
    C C73 0.7490(2) 0.59694(15) 0.96566(13) 0.0212(6) Uani d . . . 1 . .
    C C74 0.8335(3) 0.63388(17) 0.99526(15) 0.0306(7) Uani d . . . 1 . .
    H H74 0.8514 0.6826 0.9699 0.037 Uiso calc U . R 1 . .
    C C75 0.8918(3) 0.6009(2) 1.06068(16) 0.0421(8) Uani d . . . 1 . .
    H H75 0.9488 0.6272 1.08 0.051 Uiso calc U . R 1 . .
    C C76 0.8675(3) 0.5300(2) 1.09813(17) 0.0432(8) Uani d . . . 1 . .
    H H76 0.9085 0.5068 1.1428 0.052 Uiso calc U . R 1 . .
    C C77 0.7832(3) 0.49289(18) 1.07016(16) 0.0385(8) Uani d . . . 1 . .
    H H77 0.7653 0.4444 1.096 0.046 Uiso calc U . R 1 . .
    C C78 0.7244(3) 0.52584(16) 1.00464(14) 0.0283(6) Uani d . . . 1 . .
    H H78 0.6666 0.4996 0.986 0.034 Uiso calc U . R 1 . .
    H H1M 0.706(3) 0.7502(16) 0.4222(15) 0.041(8) Uiso d . . . 1 . .
    H H2M 0.636(3) 0.7582(16) 0.9000(15) 0.040(8) Uiso d . . . 1 . .

loop_
    _atom_site_aniso_label
    _atom_site_aniso_U_11
    _atom_site_aniso_U_22
    _atom_site_aniso_U_33
    _atom_site_aniso_U_12
    _atom_site_aniso_U_13
    _atom_site_aniso_U_23
    Mn1 0.0188(2) 0.0177(2) 0.0187(2) -0.00526(16) -0.00241(16) -0.00174(16)
    P1 0.0199(3) 0.0225(4) 0.0180(3) -0.0061(3) 0.0012(3) -0.0035(3)
    P2 0.0165(3) 0.0179(3) 0.0200(4) -0.0037(3) -0.0002(3) -0.0021(3)
    N1 0.0252(12) 0.0213(12) 0.0209(12) -0.0066(10) -0.0057(10) 0.0007(9)
    N2 0.0204(11) 0.0149(11) 0.0206(11) -0.0050(9) -0.0028(9) -0.0039(9)
    N3 0.0194(11) 0.0161(11) 0.0222(12) -0.0034(9) -0.0038(9) -0.0027(9)
    C1 0.0279(16) 0.0412(18) 0.0372(18) -0.0076(14) -0.0122(14) 0.0012(14)
    C2 0.0237(15) 0.0216(14) 0.0281(15) -0.0046(12) -0.0094(12) -0.0001(12)
    C3 0.0190(14) 0.0172(13) 0.0308(15) -0.0017(11) -0.0056(12) -0.0039(11)
    C4 0.0164(14) 0.0245(15) 0.0400(18) -0.0017(11) -0.0036(12) -0.0047(13)
    C5 0.0204(14) 0.0204(14) 0.0359(17) -0.0034(11) 0.0060(12) -0.0047(12)
    C6 0.0284(15) 0.0200(14) 0.0241(15) -0.0030(12) 0.0004(12) -0.0048(11)
    C7 0.0217(14) 0.0150(13) 0.0222(14) -0.0048(11) 0.0014(11) -0.0052(11)
    C8 0.0248(14) 0.0174(13) 0.0191(14) -0.0060(11) -0.0015(11) -0.0017(11)
    C9 0.0290(15) 0.0345(16) 0.0209(14) -0.0099(13) -0.0035(12) -0.0022(12)
    C10 0.0325(16) 0.0305(16) 0.0215(15) -0.0119(13) -0.0071(12) 0.0042(12)
    C11 0.0370(17) 0.0345(16) 0.0162(14) -0.0180(13) -0.0023(12) 0.0002(12)
    C12 0.0337(16) 0.0307(16) 0.0211(15) -0.0105(13) 0.0038(12) -0.0059(12)
    C13 0.0218(14) 0.0224(14) 0.0162(13) -0.0050(11) -0.0026(11) -0.0031(11)
    C14 0.0313(16) 0.0329(16) 0.0259(15) -0.0119(13) 0.0028(13) -0.0101(13)
    C15 0.0348(17) 0.0260(16) 0.0354(17) -0.0081(13) 0.0001(14) -0.0144(13)
    C16 0.0350(17) 0.0262(15) 0.0341(17) -0.0158(13) -0.0030(13) -0.0037(13)
    C17 0.0318(16) 0.0335(17) 0.0303(16) -0.0130(13) 0.0084(13) -0.0094(13)
    C18 0.0273(15) 0.0231(14) 0.0246(15) -0.0088(12) 0.0024(12) -0.0073(12)
    C19 0.0213(14) 0.0245(14) 0.0240(14) -0.0031(11) 0.0026(11) -0.0129(12)
    C20 0.0286(16) 0.0398(18) 0.0310(16) -0.0096(13) 0.0059(13) -0.0144(14)
    C21 0.0215(16) 0.053(2) 0.051(2) -0.0100(14) 0.0121(15) -0.0301(17)
    C22 0.0299(17) 0.0400(19) 0.047(2) 0.0035(14) -0.0053(15) -0.0205(16)
    C23 0.0316(17) 0.0310(17) 0.0398(18) -0.0004(13) -0.0065(14) -0.0139(14)
    C24 0.0251(15) 0.0311(16) 0.0302(16) -0.0028(13) -0.0033(12) -0.0098(13)
    C25 0.0209(14) 0.0206(14) 0.0211(14) -0.0047(11) -0.0044(11) 0.0002(11)
    C26 0.0187(13) 0.0244(14) 0.0268(15) -0.0047(11) -0.0045(11) -0.0050(12)
    C27 0.0187(13) 0.0194(14) 0.0290(15) -0.0050(11) -0.0029(11) -0.0051(11)
    C28 0.0190(13) 0.0209(14) 0.0189(13) -0.0037(11) -0.0014(11) 0.0007(11)
    C29 0.0240(15) 0.0257(15) 0.0348(17) -0.0056(12) 0.0008(13) -0.0075(13)
    C30 0.0341(17) 0.0204(15) 0.0346(17) -0.0040(12) -0.0075(13) -0.0046(12)
    C31 0.0375(17) 0.0224(15) 0.0263(15) 0.0042(13) -0.0008(13) -0.0100(12)
    C32 0.0289(16) 0.0360(18) 0.0418(19) -0.0055(14) 0.0115(14) -0.0108(14)
    C33 0.0270(15) 0.0260(15) 0.0349(17) -0.0085(12) 0.0053(13) -0.0072(13)
    C34 0.0273(15) 0.0227(14) 0.0217(14) -0.0137(12) -0.0017(12) -0.0019(11)
    C35 0.0359(17) 0.0334(17) 0.0293(16) -0.0123(14) 0.0053(13) -0.0048(13)
    C36 0.059(2) 0.045(2) 0.0317(18) -0.0235(18) 0.0137(16) -0.0067(16)
    C37 0.087(3) 0.047(2) 0.0233(17) -0.031(2) 0.0062(18) -0.0025(16)
    C38 0.074(3) 0.0301(18) 0.0330(18) -0.0148(17) -0.0168(18) 0.0081(15)
    C39 0.0425(18) 0.0269(16) 0.0273(16) -0.0107(14) -0.0055(14) -0.0018(13)
    Mn2 0.0180(2) 0.0161(2) 0.0177(2) -0.00357(16) 0.00092(16) -0.00114(16)
    P3 0.0173(3) 0.0188(3) 0.0161(3) -0.0032(3) -0.0007(3) -0.0020(3)
    P4 0.0181(3) 0.0161(3) 0.0199(3) -0.0039(3) 0.0000(3) -0.0016(3)
    N4 0.0253(12) 0.0193(11) 0.0187(12) -0.0043(9) 0.0006(9) -0.0009(9)
    N5 0.0186(11) 0.0150(11) 0.0231(12) -0.0038(9) 0.0006(9) -0.0019(9)
    N6 0.0195(11) 0.0157(11) 0.0191(11) -0.0020(9) 0.0008(9) -0.0017(9)
    C40 0.0298(16) 0.0432(18) 0.0290(16) -0.0120(14) 0.0098(13) 0.0035(14)
    C41 0.0234(14) 0.0217(14) 0.0253(15) -0.0066(11) 0.0060(12) 0.0008(11)
    C42 0.0221(14) 0.0178(13) 0.0253(15) -0.0050(11) 0.0023(12) -0.0024(11)
    C43 0.0223(15) 0.0256(15) 0.0417(18) -0.0086(12) 0.0064(13) -0.0030(13)
    C44 0.0244(15) 0.0300(16) 0.0411(18) -0.0072(13) -0.0072(13) -0.0067(14)
    C45 0.0283(15) 0.0255(15) 0.0279(15) -0.0062(12) -0.0047(12) -0.0053(12)
    C46 0.0268(15) 0.0149(13) 0.0222(14) -0.0024(11) -0.0025(11) -0.0040(11)
    C47 0.0243(14) 0.0188(13) 0.0184(13) -0.0022(11) -0.0016(11) -0.0036(11)
    C48 0.0353(17) 0.0325(16) 0.0229(15) -0.0067(13) 0.0006(13) -0.0060(12)
    C49 0.0284(15) 0.0269(15) 0.0190(14) -0.0037(12) 0.0034(12) 0.0027(11)
    C50 0.0285(15) 0.0334(16) 0.0157(14) -0.0027(12) -0.0002(12) -0.0013(12)
    C51 0.0228(14) 0.0277(15) 0.0198(14) -0.0028(12) -0.0031(11) -0.0054(11)
    C52 0.0221(14) 0.0200(13) 0.0160(13) -0.0043(11) -0.0004(11) -0.0063(11)
    C53 0.0215(14) 0.0232(14) 0.0223(14) -0.0039(11) -0.0014(11) -0.0067(11)
    C54 0.0294(15) 0.0216(14) 0.0264(15) -0.0068(12) -0.0010(12) -0.0038(12)
    C55 0.0276(15) 0.0289(16) 0.0269(15) -0.0144(12) 0.0019(12) -0.0072(12)
    C56 0.0188(14) 0.0299(16) 0.0409(18) -0.0051(12) 0.0009(13) -0.0110(13)
    C57 0.0245(15) 0.0196(14) 0.0352(16) -0.0047(12) -0.0029(12) -0.0063(12)
    C58 0.0164(13) 0.0188(13) 0.0223(14) -0.0054(11) 0.0025(11) -0.0020(11)
    C59 0.0217(14) 0.0210(14) 0.0202(14) -0.0044(11) -0.0005(11) -0.0029(11)
    C60 0.0260(15) 0.0257(15) 0.0300(16) -0.0076(12) -0.0090(12) -0.0017(12)
    C61 0.0195(14) 0.0232(15) 0.0435(18) -0.0011(12) -0.0030(13) -0.0059(13)
    C62 0.0232(15) 0.0289(16) 0.0317(16) -0.0060(12) 0.0074(12) -0.0091(13)
    C63 0.0243(14) 0.0242(14) 0.0228(14) -0.0071(12) 0.0008(12) -0.0036(12)
    C64 0.0229(14) 0.0238(14) 0.0198(14) -0.0056(11) 0.0018(11) 0.0000(11)
    C65 0.0211(14) 0.0271(15) 0.0238(15) -0.0055(12) 0.0071(11) -0.0030(12)
    C66 0.0188(13) 0.0222(14) 0.0283(15) -0.0042(11) 0.0031(11) -0.0044(11)
    C67 0.0269(15) 0.0169(13) 0.0206(14) -0.0062(11) -0.0010(11) -0.0001(11)
    C68 0.0296(15) 0.0209(14) 0.0284(15) -0.0060(12) 0.0017(12) -0.0041(12)
    C69 0.0324(16) 0.0274(16) 0.0342(17) -0.0121(13) -0.0041(13) -0.0034(13)
    C70 0.0507(19) 0.0228(15) 0.0234(15) -0.0156(14) -0.0023(14) -0.0036(12)
    C71 0.0411(18) 0.0193(14) 0.0270(16) -0.0028(13) 0.0004(13) -0.0031(12)
    C72 0.0262(15) 0.0235(15) 0.0282(15) -0.0038(12) -0.0001(12) -0.0034(12)
    C73 0.0195(13) 0.0211(14) 0.0199(14) 0.0007(11) 0.0001(11) -0.0012(11)
    C74 0.0290(16) 0.0316(16) 0.0297(16) -0.0104(13) -0.0056(13) 0.0049(13)
    C75 0.0367(18) 0.055(2) 0.0356(18) -0.0147(16) -0.0131(15) -0.0002(16)
    C76 0.0376(18) 0.053(2) 0.0301(18) -0.0015(16) -0.0103(15) 0.0103(15)
    C77 0.0441(19) 0.0326(17) 0.0327(18) -0.0054(15) 0.0000(15) 0.0071(14)
    C78 0.0313(16) 0.0264(15) 0.0256(15) -0.0049(12) 0.0011(13) -0.0020(12)

_geom_special_details                   
;
All esds (except the esd in the dihedral angle between two l.s. planes)
are estimated using the full covariance matrix.  The cell esds are taken
into account individually in the estimation of esds in distances, angles
and torsion angles; correlations between esds in cell parameters are only
used when they are defined by crystal symmetry.  An approximate (isotropic)
treatment of cell esds is used for estimating esds involving l.s. planes.
;

loop_
    _geom_bond_atom_site_label_1
    _geom_bond_atom_site_label_2
    _geom_bond_site_symmetry_2
    _geom_bond_distance
    _geom_bond_publ_flag
    Mn1 N2 . 1.860(2) ?
    Mn1 N1 . 1.945(2) ?
    Mn1 N3 . 1.947(2) ?
    Mn1 P1 . 2.2067(8) ?
    Mn1 P2 . 2.2158(7) ?
    Mn1 H1M . 1.57(3) ?
    P1 C19 . 1.827(3) ?
    P1 C12 . 1.838(3) ?
    P1 C13 . 1.845(3) ?
    P2 C34 . 1.832(3) ?
    P2 C27 . 1.841(3) ?
    P2 C28 . 1.845(3) ?
    N1 C2 . 1.351(3) ?
    N1 C10 . 1.469(3) ?
    N2 C3 . 1.387(3) ?
    N2 C7 . 1.393(3) ?
    N3 C8 . 1.342(3) ?
    N3 C25 . 1.462(3) ?
    C1 C2 . 1.504(4) ?
    C1 H1A . 0.98 ?
    C1 H1B . 0.98 ?
    C1 H1C . 0.98 ?
    C2 C3 . 1.424(4) ?
    C3 C4 . 1.398(4) ?
    C4 C5 . 1.385(4) ?
    C4 H4 . 0.95 ?
    C5 C6 . 1.387(4) ?
    C5 H5 . 0.95 ?
    C6 C7 . 1.391(3) ?
    C6 H6 . 0.95 ?
    C7 C8 . 1.418(3) ?
    C8 C9 . 1.505(3) ?
    C9 H9A . 0.98 ?
    C9 H9B . 0.98 ?
    C9 H9C . 0.98 ?
    C10 C11 . 1.526(4) ?
    C10 H10A . 0.99 ?
    C10 H10B . 0.99 ?
    C11 C12 . 1.531(4) ?
    C11 H11A . 0.99 ?
    C11 H11B . 0.99 ?
    C12 H12A . 0.99 ?
    C12 H12B . 0.99 ?
    C13 C18 . 1.379(3) ?
    C13 C14 . 1.392(4) ?
    C14 C15 . 1.381(4) ?
    C14 H14 . 0.95 ?
    C15 C16 . 1.378(4) ?
    C15 H15 . 0.95 ?
    C16 C17 . 1.376(4) ?
    C16 H16 . 0.95 ?
    C17 C18 . 1.387(4) ?
    C17 H17 . 0.95 ?
    C18 H18 . 0.95 ?
    C19 C20 . 1.392(4) ?
    C19 C24 . 1.398(4) ?
    C20 C21 . 1.394(4) ?
    C20 H20 . 0.95 ?
    C21 C22 . 1.381(4) ?
    C21 H21 . 0.95 ?
    C22 C23 . 1.373(4) ?
    C22 H22 . 0.95 ?
    C23 C24 . 1.379(4) ?
    C23 H23 . 0.95 ?
    C24 H24 . 0.95 ?
    C25 C26 . 1.528(3) ?
    C25 H25A . 0.99 ?
    C25 H25B . 0.99 ?
    C26 C27 . 1.528(3) ?
    C26 H26A . 0.99 ?
    C26 H26B . 0.99 ?
    C27 H27A . 0.99 ?
    C27 H27B . 0.99 ?
    C28 C33 . 1.377(4) ?
    C28 C29 . 1.399(4) ?
    C29 C30 . 1.380(4) ?
    C29 H29 . 0.95 ?
    C30 C31 . 1.378(4) ?
    C30 H30 . 0.95 ?
    C31 C32 . 1.377(4) ?
    C31 H31 . 0.95 ?
    C32 C33 . 1.390(4) ?
    C32 H32 . 0.95 ?
    C33 H33 . 0.95 ?
    C34 C35 . 1.390(4) ?
    C34 C39 . 1.391(4) ?
    C35 C36 . 1.382(4) ?
    C35 H35 . 0.95 ?
    C36 C37 . 1.365(5) ?
    C36 H36 . 0.95 ?
    C37 C38 . 1.373(5) ?
    C37 H37 . 0.95 ?
    C38 C39 . 1.396(4) ?
    C38 H38 . 0.95 ?
    C39 H39 . 0.95 ?
    Mn2 N5 . 1.862(2) ?
    Mn2 N6 . 1.948(2) ?
    Mn2 N4 . 1.951(2) ?
    Mn2 P4 . 2.2064(7) ?
    Mn2 P3 . 2.2117(8) ?
    Mn2 H2M . 1.51(3) ?
    P3 C52 . 1.837(3) ?
    P3 C58 . 1.837(3) ?
    P3 C51 . 1.841(3) ?
    P4 C73 . 1.835(3) ?
    P4 C66 . 1.840(3) ?
    P4 C67 . 1.843(3) ?
    N4 C41 . 1.343(3) ?
    N4 C49 . 1.467(3) ?
    N5 C42 . 1.388(3) ?
    N5 C46 . 1.398(3) ?
    N6 C47 . 1.346(3) ?
    N6 C64 . 1.473(3) ?
    C40 C41 . 1.506(3) ?
    C40 H40A . 0.98 ?
    C40 H40B . 0.98 ?
    C40 H40C . 0.98 ?
    C41 C42 . 1.418(4) ?
    C42 C43 . 1.390(4) ?
    C43 C44 . 1.398(4) ?
    C43 H43 . 0.95 ?
    C44 C45 . 1.380(4) ?
    C44 H44 . 0.95 ?
    C45 C46 . 1.399(4) ?
    C45 H45 . 0.95 ?
    C46 C47 . 1.419(4) ?
    C47 C48 . 1.507(3) ?
    C48 H48A . 0.98 ?
    C48 H48B . 0.98 ?
    C48 H48C . 0.98 ?
    C49 C50 . 1.528(4) ?
    C49 H49A . 0.99 ?
    C49 H49B . 0.99 ?
    C50 C51 . 1.537(4) ?
    C50 H50A . 0.99 ?
    C50 H50B . 0.99 ?
    C51 H51A . 0.99 ?
    C51 H51B . 0.99 ?
    C52 C53 . 1.390(3) ?
    C52 C57 . 1.394(3) ?
    C53 C54 . 1.390(4) ?
    C53 H53 . 0.95 ?
    C54 C55 . 1.382(4) ?
    C54 H54 . 0.95 ?
    C55 C56 . 1.381(4) ?
    C55 H55 . 0.95 ?
    C56 C57 . 1.383(4) ?
    C56 H56 . 0.95 ?
    C57 H57 . 0.95 ?
    C58 C59 . 1.395(3) ?
    C58 C63 . 1.396(3) ?
    C59 C60 . 1.386(4) ?
    C59 H59 . 0.95 ?
    C60 C61 . 1.380(4) ?
    C60 H60 . 0.95 ?
    C61 C62 . 1.374(4) ?
    C61 H61 . 0.95 ?
    C62 C63 . 1.390(4) ?
    C62 H62 . 0.95 ?
    C63 H63 . 0.95 ?
    C64 C65 . 1.526(3) ?
    C64 H64A . 0.99 ?
    C64 H64B . 0.99 ?
    C65 C66 . 1.533(4) ?
    C65 H65A . 0.99 ?
    C65 H65B . 0.99 ?
    C66 H66A . 0.99 ?
    C66 H66B . 0.99 ?
    C67 C68 . 1.391(4) ?
    C67 C72 . 1.394(4) ?
    C68 C69 . 1.386(4) ?
    C68 H68 . 0.95 ?
    C69 C70 . 1.382(4) ?
    C69 H69 . 0.95 ?
    C70 C71 . 1.381(4) ?
    C70 H70 . 0.95 ?
    C71 C72 . 1.382(4) ?
    C71 H71 . 0.95 ?
    C72 H72 . 0.95 ?
    C73 C78 . 1.394(4) ?
    C73 C74 . 1.395(4) ?
    C74 C75 . 1.381(4) ?
    C74 H74 . 0.95 ?
    C75 C76 . 1.380(4) ?
    C75 H75 . 0.95 ?
    C76 C77 . 1.380(4) ?
    C76 H76 . 0.95 ?
    C77 C78 . 1.385(4) ?
    C77 H77 . 0.95 ?
    C78 H78 . 0.95 ?

loop_
    _geom_angle_atom_site_label_1
    _geom_angle_atom_site_label_2
    _geom_angle_atom_site_label_3
    _geom_angle_site_symmetry_1
    _geom_angle_site_symmetry_3
    _geom_angle
    _geom_angle_publ_flag
    N2 Mn1 N1 . . 79.32(9) ?
    N2 Mn1 N3 . . 79.49(9) ?
    N1 Mn1 N3 . . 158.81(9) ?
    N2 Mn1 P1 . . 114.01(6) ?
    N1 Mn1 P1 . . 86.64(7) ?
    N3 Mn1 P1 . . 101.59(6) ?
    N2 Mn1 P2 . . 122.13(6) ?
    N1 Mn1 P2 . . 103.15(6) ?
    N3 Mn1 P2 . . 88.56(6) ?
    P1 Mn1 P2 . . 123.85(3) ?
    N2 Mn1 H1M . . 175.0(10) ?
    N1 Mn1 H1M . . 102.5(10) ?
    N3 Mn1 H1M . . 98.5(10) ?
    P1 Mn1 H1M . . 61.7(10) ?
    P2 Mn1 H1M . . 62.2(10) ?
    C19 P1 C12 . . 104.92(12) ?
    C19 P1 C13 . . 99.66(12) ?
    C12 P1 C13 . . 100.69(12) ?
    C19 P1 Mn1 . . 117.26(8) ?
    C12 P1 Mn1 . . 112.03(9) ?
    C13 P1 Mn1 . . 119.93(8) ?
    C34 P2 C27 . . 102.12(12) ?
    C34 P2 C28 . . 100.74(11) ?
    C27 P2 C28 . . 100.83(11) ?
    C34 P2 Mn1 . . 119.12(8) ?
    C27 P2 Mn1 . . 111.67(8) ?
    C28 P2 Mn1 . . 119.53(8) ?
    C2 N1 C10 . . 117.9(2) ?
    C2 N1 Mn1 . . 117.21(17) ?
    C10 N1 Mn1 . . 124.07(17) ?
    C3 N2 C7 . . 119.9(2) ?
    C3 N2 Mn1 . . 120.09(17) ?
    C7 N2 Mn1 . . 119.78(16) ?
    C8 N3 C25 . . 117.9(2) ?
    C8 N3 Mn1 . . 116.96(17) ?
    C25 N3 Mn1 . . 124.92(16) ?
    C2 C1 H1A . . 109.5 ?
    C2 C1 H1B . . 109.5 ?
    H1A C1 H1B . . 109.5 ?
    C2 C1 H1C . . 109.5 ?
    H1A C1 H1C . . 109.5 ?
    H1B C1 H1C . . 109.5 ?
    N1 C2 C3 . . 112.7(2) ?
    N1 C2 C1 . . 125.0(2) ?
    C3 C2 C1 . . 122.2(2) ?
    N2 C3 C4 . . 119.8(2) ?
    N2 C3 C2 . . 110.4(2) ?
    C4 C3 C2 . . 129.7(2) ?
    C5 C4 C3 . . 119.7(2) ?
    C5 C4 H4 . . 120.1 ?
    C3 C4 H4 . . 120.1 ?
    C4 C5 C6 . . 120.8(2) ?
    C4 C5 H5 . . 119.6 ?
    C6 C5 H5 . . 119.6 ?
    C5 C6 C7 . . 119.2(2) ?
    C5 C6 H6 . . 120.4 ?
    C7 C6 H6 . . 120.4 ?
    C6 C7 N2 . . 120.5(2) ?
    C6 C7 C8 . . 129.3(2) ?
    N2 C7 C8 . . 110.1(2) ?
    N3 C8 C7 . . 113.4(2) ?
    N3 C8 C9 . . 124.0(2) ?
    C7 C8 C9 . . 122.7(2) ?
    C8 C9 H9A . . 109.5 ?
    C8 C9 H9B . . 109.5 ?
    H9A C9 H9B . . 109.5 ?
    C8 C9 H9C . . 109.5 ?
    H9A C9 H9C . . 109.5 ?
    H9B C9 H9C . . 109.5 ?
    N1 C10 C11 . . 110.7(2) ?
    N1 C10 H10A . . 109.5 ?
    C11 C10 H10A . . 109.5 ?
    N1 C10 H10B . . 109.5 ?
    C11 C10 H10B . . 109.5 ?
    H10A C10 H10B . . 108.1 ?
    C10 C11 C12 . . 114.0(2) ?
    C10 C11 H11A . . 108.8 ?
    C12 C11 H11A . . 108.8 ?
    C10 C11 H11B . . 108.8 ?
    C12 C11 H11B . . 108.8 ?
    H11A C11 H11B . . 107.6 ?
    C11 C12 P1 . . 111.62(19) ?
    C11 C12 H12A . . 109.3 ?
    P1 C12 H12A . . 109.3 ?
    C11 C12 H12B . . 109.3 ?
    P1 C12 H12B . . 109.3 ?
    H12A C12 H12B . . 108.0 ?
    C18 C13 C14 . . 118.6(2) ?
    C18 C13 P1 . . 119.69(19) ?
    C14 C13 P1 . . 121.71(19) ?
    C15 C14 C13 . . 121.0(3) ?
    C15 C14 H14 . . 119.5 ?
    C13 C14 H14 . . 119.5 ?
    C16 C15 C14 . . 119.7(3) ?
    C16 C15 H15 . . 120.2 ?
    C14 C15 H15 . . 120.2 ?
    C17 C16 C15 . . 120.0(3) ?
    C17 C16 H16 . . 120.0 ?
    C15 C16 H16 . . 120.0 ?
    C16 C17 C18 . . 120.1(3) ?
    C16 C17 H17 . . 120.0 ?
    C18 C17 H17 . . 120.0 ?
    C13 C18 C17 . . 120.7(2) ?
    C13 C18 H18 . . 119.7 ?
    C17 C18 H18 . . 119.7 ?
    C20 C19 C24 . . 118.0(3) ?
    C20 C19 P1 . . 122.4(2) ?
    C24 C19 P1 . . 119.1(2) ?
    C19 C20 C21 . . 120.5(3) ?
    C19 C20 H20 . . 119.8 ?
    C21 C20 H20 . . 119.8 ?
    C22 C21 C20 . . 120.0(3) ?
    C22 C21 H21 . . 120.0 ?
    C20 C21 H21 . . 120.0 ?
    C23 C22 C21 . . 120.1(3) ?
    C23 C22 H22 . . 119.9 ?
    C21 C22 H22 . . 119.9 ?
    C22 C23 C24 . . 120.1(3) ?
    C22 C23 H23 . . 120.0 ?
    C24 C23 H23 . . 120.0 ?
    C23 C24 C19 . . 121.2(3) ?
    C23 C24 H24 . . 119.4 ?
    C19 C24 H24 . . 119.4 ?
    N3 C25 C26 . . 111.5(2) ?
    N3 C25 H25A . . 109.3 ?
    C26 C25 H25A . . 109.3 ?
    N3 C25 H25B . . 109.3 ?
    C26 C25 H25B . . 109.3 ?
    H25A C25 H25B . . 108.0 ?
    C27 C26 C25 . . 113.1(2) ?
    C27 C26 H26A . . 109.0 ?
    C25 C26 H26A . . 109.0 ?
    C27 C26 H26B . . 109.0 ?
    C25 C26 H26B . . 109.0 ?
    H26A C26 H26B . . 107.8 ?
    C26 C27 P2 . . 112.81(17) ?
    C26 C27 H27A . . 109.0 ?
    P2 C27 H27A . . 109.0 ?
    C26 C27 H27B . . 109.0 ?
    P2 C27 H27B . . 109.0 ?
    H27A C27 H27B . . 107.8 ?
    C33 C28 C29 . . 118.7(2) ?
    C33 C28 P2 . . 118.9(2) ?
    C29 C28 P2 . . 122.4(2) ?
    C30 C29 C28 . . 120.4(3) ?
    C30 C29 H29 . . 119.8 ?
    C28 C29 H29 . . 119.8 ?
    C31 C30 C29 . . 120.4(3) ?
    C31 C30 H30 . . 119.8 ?
    C29 C30 H30 . . 119.8 ?
    C32 C31 C30 . . 119.6(3) ?
    C32 C31 H31 . . 120.2 ?
    C30 C31 H31 . . 120.2 ?
    C31 C32 C33 . . 120.2(3) ?
    C31 C32 H32 . . 119.9 ?
    C33 C32 H32 . . 119.9 ?
    C28 C33 C32 . . 120.7(3) ?
    C28 C33 H33 . . 119.7 ?
    C32 C33 H33 . . 119.7 ?
    C35 C34 C39 . . 118.1(3) ?
    C35 C34 P2 . . 120.9(2) ?
    C39 C34 P2 . . 120.8(2) ?
    C36 C35 C34 . . 121.2(3) ?
    C36 C35 H35 . . 119.4 ?
    C34 C35 H35 . . 119.4 ?
    C37 C36 C35 . . 120.2(3) ?
    C37 C36 H36 . . 119.9 ?
    C35 C36 H36 . . 119.9 ?
    C36 C37 C38 . . 120.0(3) ?
    C36 C37 H37 . . 120.0 ?
    C38 C37 H37 . . 120.0 ?
    C37 C38 C39 . . 120.4(3) ?
    C37 C38 H38 . . 119.8 ?
    C39 C38 H38 . . 119.8 ?
    C34 C39 C38 . . 120.1(3) ?
    C34 C39 H39 . . 120.0 ?
    C38 C39 H39 . . 120.0 ?
    N5 Mn2 N6 . . 79.42(9) ?
    N5 Mn2 N4 . . 79.26(9) ?
    N6 Mn2 N4 . . 158.64(9) ?
    N5 Mn2 P4 . . 122.08(7) ?
    N6 Mn2 P4 . . 89.74(6) ?
    N4 Mn2 P4 . . 100.48(6) ?
    N5 Mn2 P3 . . 109.40(6) ?
    N6 Mn2 P3 . . 104.73(6) ?
    N4 Mn2 P3 . . 83.67(6) ?
    P4 Mn2 P3 . . 128.30(3) ?
    N5 Mn2 H2M . . 172.9(10) ?
    N6 Mn2 H2M . . 96.9(10) ?
    N4 Mn2 H2M . . 104.5(10) ?
    P4 Mn2 H2M . . 63.5(10) ?
    P3 Mn2 H2M . . 65.6(10) ?
    C52 P3 C58 . . 102.58(11) ?
    C52 P3 C51 . . 101.07(12) ?
    C58 P3 C51 . . 103.80(12) ?
    C52 P3 Mn2 . . 120.46(8) ?
    C58 P3 Mn2 . . 114.78(8) ?
    C51 P3 Mn2 . . 112.05(9) ?
    C73 P4 C66 . . 101.67(12) ?
    C73 P4 C67 . . 100.56(11) ?
    C66 P4 C67 . . 100.05(12) ?
    C73 P4 Mn2 . . 121.48(8) ?
    C66 P4 Mn2 . . 111.75(9) ?
    C67 P4 Mn2 . . 118.12(9) ?
    C41 N4 C49 . . 118.9(2) ?
    C41 N4 Mn2 . . 116.65(17) ?
    C49 N4 Mn2 . . 123.90(17) ?
    C42 N5 C46 . . 119.9(2) ?
    C42 N5 Mn2 . . 120.09(17) ?
    C46 N5 Mn2 . . 119.76(17) ?
    C47 N6 C64 . . 117.8(2) ?
    C47 N6 Mn2 . . 117.29(16) ?
    C64 N6 Mn2 . . 124.65(16) ?
    C41 C40 H40A . . 109.5 ?
    C41 C40 H40B . . 109.5 ?
    H40A C40 H40B . . 109.5 ?
    C41 C40 H40C . . 109.5 ?
    H40A C40 H40C . . 109.5 ?
    H40B C40 H40C . . 109.5 ?
    N4 C41 C42 . . 113.7(2) ?
    N4 C41 C40 . . 125.0(2) ?
    C42 C41 C40 . . 121.3(2) ?
    N5 C42 C43 . . 120.4(2) ?
    N5 C42 C41 . . 110.0(2) ?
    C43 C42 C41 . . 129.6(2) ?
    C42 C43 C44 . . 119.5(3) ?
    C42 C43 H43 . . 120.3 ?
    C44 C43 H43 . . 120.3 ?
    C45 C44 C43 . . 120.5(3) ?
    C45 C44 H44 . . 119.7 ?
    C43 C44 H44 . . 119.7 ?
    C44 C45 C46 . . 120.0(3) ?
    C44 C45 H45 . . 120.0 ?
    C46 C45 H45 . . 120.0 ?
    N5 C46 C45 . . 119.7(2) ?
    N5 C46 C47 . . 110.3(2) ?
    C45 C46 C47 . . 130.0(2) ?
    N6 C47 C46 . . 113.1(2) ?
    N6 C47 C48 . . 125.4(2) ?
    C46 C47 C48 . . 121.5(2) ?
    C47 C48 H48A . . 109.5 ?
    C47 C48 H48B . . 109.5 ?
    H48A C48 H48B . . 109.5 ?
    C47 C48 H48C . . 109.5 ?
    H48A C48 H48C . . 109.5 ?
    H48B C48 H48C . . 109.5 ?
    N4 C49 C50 . . 110.6(2) ?
    N4 C49 H49A . . 109.5 ?
    C50 C49 H49A . . 109.5 ?
    N4 C49 H49B . . 109.5 ?
    C50 C49 H49B . . 109.5 ?
    H49A C49 H49B . . 108.1 ?
    C49 C50 C51 . . 113.6(2) ?
    C49 C50 H50A . . 108.8 ?
    C51 C50 H50A . . 108.8 ?
    C49 C50 H50B . . 108.8 ?
    C51 C50 H50B . . 108.8 ?
    H50A C50 H50B . . 107.7 ?
    C50 C51 P3 . . 114.11(18) ?
    C50 C51 H51A . . 108.7 ?
    P3 C51 H51A . . 108.7 ?
    C50 C51 H51B . . 108.7 ?
    P3 C51 H51B . . 108.7 ?
    H51A C51 H51B . . 107.6 ?
    C53 C52 C57 . . 117.6(2) ?
    C53 C52 P3 . . 123.01(19) ?
    C57 C52 P3 . . 119.33(19) ?
    C52 C53 C54 . . 121.0(2) ?
    C52 C53 H53 . . 119.5 ?
    C54 C53 H53 . . 119.5 ?
    C55 C54 C53 . . 120.3(3) ?
    C55 C54 H54 . . 119.9 ?
    C53 C54 H54 . . 119.9 ?
    C56 C55 C54 . . 119.5(3) ?
    C56 C55 H55 . . 120.3 ?
    C54 C55 H55 . . 120.3 ?
    C55 C56 C57 . . 120.0(3) ?
    C55 C56 H56 . . 120.0 ?
    C57 C56 H56 . . 120.0 ?
    C56 C57 C52 . . 121.5(2) ?
    C56 C57 H57 . . 119.2 ?
    C52 C57 H57 . . 119.2 ?
    C59 C58 C63 . . 118.7(2) ?
    C59 C58 P3 . . 116.90(19) ?
    C63 C58 P3 . . 124.3(2) ?
    C60 C59 C58 . . 120.5(2) ?
    C60 C59 H59 . . 119.8 ?
    C58 C59 H59 . . 119.8 ?
    C61 C60 C59 . . 120.1(3) ?
    C61 C60 H60 . . 120.0 ?
    C59 C60 H60 . . 120.0 ?
    C62 C61 C60 . . 120.2(3) ?
    C62 C61 H61 . . 119.9 ?
    C60 C61 H61 . . 119.9 ?
    C61 C62 C63 . . 120.3(3) ?
    C61 C62 H62 . . 119.9 ?
    C63 C62 H62 . . 119.9 ?
    C62 C63 C58 . . 120.2(3) ?
    C62 C63 H63 . . 119.9 ?
    C58 C63 H63 . . 119.9 ?
    N6 C64 C65 . . 111.9(2) ?
    N6 C64 H64A . . 109.2 ?
    C65 C64 H64A . . 109.2 ?
    N6 C64 H64B . . 109.2 ?
    C65 C64 H64B . . 109.2 ?
    H64A C64 H64B . . 107.9 ?
    C64 C65 C66 . . 113.4(2) ?
    C64 C65 H65A . . 108.9 ?
    C66 C65 H65A . . 108.9 ?
    C64 C65 H65B . . 108.9 ?
    C66 C65 H65B . . 108.9 ?
    H65A C65 H65B . . 107.7 ?
    C65 C66 P4 . . 111.92(17) ?
    C65 C66 H66A . . 109.2 ?
    P4 C66 H66A . . 109.2 ?
    C65 C66 H66B . . 109.2 ?
    P4 C66 H66B . . 109.2 ?
    H66A C66 H66B . . 107.9 ?
    C68 C67 C72 . . 118.8(2) ?
    C68 C67 P4 . . 119.13(19) ?
    C72 C67 P4 . . 122.0(2) ?
    C69 C68 C67 . . 120.4(3) ?
    C69 C68 H68 . . 119.8 ?
    C67 C68 H68 . . 119.8 ?
    C70 C69 C68 . . 120.0(3) ?
    C70 C69 H69 . . 120.0 ?
    C68 C69 H69 . . 120.0 ?
    C71 C70 C69 . . 120.2(3) ?
    C71 C70 H70 . . 119.9 ?
    C69 C70 H70 . . 119.9 ?
    C70 C71 C72 . . 119.8(3) ?
    C70 C71 H71 . . 120.1 ?
    C72 C71 H71 . . 120.1 ?
    C71 C72 C67 . . 120.7(3) ?
    C71 C72 H72 . . 119.6 ?
    C67 C72 H72 . . 119.6 ?
    C78 C73 C74 . . 117.7(2) ?
    C78 C73 P4 . . 121.8(2) ?
    C74 C73 P4 . . 120.4(2) ?
    C75 C74 C73 . . 121.3(3) ?
    C75 C74 H74 . . 119.4 ?
    C73 C74 H74 . . 119.4 ?
    C76 C75 C74 . . 120.2(3) ?
    C76 C75 H75 . . 119.9 ?
    C74 C75 H75 . . 119.9 ?
    C75 C76 C77 . . 119.4(3) ?
    C75 C76 H76 . . 120.3 ?
    C77 C76 H76 . . 120.3 ?
    C76 C77 C78 . . 120.5(3) ?
    C76 C77 H77 . . 119.7 ?
    C78 C77 H77 . . 119.7 ?
    C77 C78 C73 . . 120.8(3) ?
    C77 C78 H78 . . 119.6 ?
    C73 C78 H78 . . 119.6 ?

loop_
    _geom_torsion_atom_site_label_1
    _geom_torsion_atom_site_label_2
    _geom_torsion_atom_site_label_3
    _geom_torsion_atom_site_label_4
    _geom_torsion_site_symmetry_1
    _geom_torsion_site_symmetry_2
    _geom_torsion_site_symmetry_3
    _geom_torsion_site_symmetry_4
    _geom_torsion
    _geom_torsion_publ_flag
    N1 Mn1 N2 C3 . . . . -4.68(18) ?
    N3 Mn1 N2 C3 . . . . 174.84(19) ?
    P1 Mn1 N2 C3 . . . . 76.73(18) ?
    P2 Mn1 N2 C3 . . . . -103.60(17) ?
    N1 Mn1 N2 C7 . . . . -179.10(19) ?
    N3 Mn1 N2 C7 . . . . 0.42(17) ?
    P1 Mn1 N2 C7 . . . . -97.69(17) ?
    P2 Mn1 N2 C7 . . . . 81.98(18) ?
    C10 N1 C2 C3 . . . . -174.0(2) ?
    Mn1 N1 C2 C3 . . . . -4.2(3) ?
    C10 N1 C2 C1 . . . . 3.3(4) ?
    Mn1 N1 C2 C1 . . . . 173.2(2) ?
    C7 N2 C3 C4 . . . . 1.1(3) ?
    Mn1 N2 C3 C4 . . . . -173.30(19) ?
    C7 N2 C3 C2 . . . . 178.1(2) ?
    Mn1 N2 C3 C2 . . . . 3.7(3) ?
    N1 C2 C3 N2 . . . . 0.5(3) ?
    C1 C2 C3 N2 . . . . -177.0(2) ?
    N1 C2 C3 C4 . . . . 177.1(3) ?
    C1 C2 C3 C4 . . . . -0.3(4) ?
    N2 C3 C4 C5 . . . . -0.3(4) ?
    C2 C3 C4 C5 . . . . -176.6(3) ?
    C3 C4 C5 C6 . . . . -1.1(4) ?
    C4 C5 C6 C7 . . . . 1.6(4) ?
    C5 C6 C7 N2 . . . . -0.7(4) ?
    C5 C6 C7 C8 . . . . 175.7(2) ?
    C3 N2 C7 C6 . . . . -0.6(3) ?
    Mn1 N2 C7 C6 . . . . 173.80(18) ?
    C3 N2 C7 C8 . . . . -177.7(2) ?
    Mn1 N2 C7 C8 . . . . -3.3(3) ?
    C25 N3 C8 C7 . . . . 179.9(2) ?
    Mn1 N3 C8 C7 . . . . -5.4(3) ?
    C25 N3 C8 C9 . . . . -1.2(3) ?
    Mn1 N3 C8 C9 . . . . 173.47(19) ?
    C6 C7 C8 N3 . . . . -171.4(2) ?
    N2 C7 C8 N3 . . . . 5.3(3) ?
    C6 C7 C8 C9 . . . . 9.7(4) ?
    N2 C7 C8 C9 . . . . -173.5(2) ?
    C2 N1 C10 C11 . . . . 93.1(3) ?
    Mn1 N1 C10 C11 . . . . -75.9(3) ?
    N1 C10 C11 C12 . . . . 67.7(3) ?
    C10 C11 C12 P1 . . . . -60.4(3) ?
    C19 P1 C12 C11 . . . . -179.11(19) ?
    C13 P1 C12 C11 . . . . -76.0(2) ?
    Mn1 P1 C12 C11 . . . . 52.6(2) ?
    C19 P1 C13 C18 . . . . -121.2(2) ?
    C12 P1 C13 C18 . . . . 131.4(2) ?
    Mn1 P1 C13 C18 . . . . 8.1(2) ?
    C19 P1 C13 C14 . . . . 56.1(2) ?
    C12 P1 C13 C14 . . . . -51.2(2) ?
    Mn1 P1 C13 C14 . . . . -174.49(18) ?
    C18 C13 C14 C15 . . . . -0.5(4) ?
    P1 C13 C14 C15 . . . . -177.9(2) ?
    C13 C14 C15 C16 . . . . 0.5(4) ?
    C14 C15 C16 C17 . . . . 0.1(4) ?
    C15 C16 C17 C18 . . . . -0.5(4) ?
    C14 C13 C18 C17 . . . . 0.0(4) ?
    P1 C13 C18 C17 . . . . 177.5(2) ?
    C16 C17 C18 C13 . . . . 0.5(4) ?
    C12 P1 C19 C20 . . . . -45.7(2) ?
    C13 P1 C19 C20 . . . . -149.6(2) ?
    Mn1 P1 C19 C20 . . . . 79.3(2) ?
    C12 P1 C19 C24 . . . . 142.3(2) ?
    C13 P1 C19 C24 . . . . 38.4(2) ?
    Mn1 P1 C19 C24 . . . . -92.7(2) ?
    C24 C19 C20 C21 . . . . -0.5(4) ?
    P1 C19 C20 C21 . . . . -172.6(2) ?
    C19 C20 C21 C22 . . . . -0.5(4) ?
    C20 C21 C22 C23 . . . . 1.5(4) ?
    C21 C22 C23 C24 . . . . -1.3(4) ?
    C22 C23 C24 C19 . . . . 0.2(4) ?
    C20 C19 C24 C23 . . . . 0.7(4) ?
    P1 C19 C24 C23 . . . . 173.1(2) ?
    C8 N3 C25 C26 . . . . 100.9(3) ?
    Mn1 N3 C25 C26 . . . . -73.4(3) ?
    N3 C25 C26 C27 . . . . 69.0(3) ?
    C25 C26 C27 P2 . . . . -61.6(2) ?
    C34 P2 C27 C26 . . . . 178.92(18) ?
    C28 P2 C27 C26 . . . . -77.49(19) ?
    Mn1 P2 C27 C26 . . . . 50.54(19) ?
    C34 P2 C28 C33 . . . . -122.4(2) ?
    C27 P2 C28 C33 . . . . 132.9(2) ?
    Mn1 P2 C28 C33 . . . . 10.2(2) ?
    C34 P2 C28 C29 . . . . 56.7(2) ?
    C27 P2 C28 C29 . . . . -48.0(2) ?
    Mn1 P2 C28 C29 . . . . -170.71(18) ?
    C33 C28 C29 C30 . . . . -0.9(4) ?
    P2 C28 C29 C30 . . . . -179.9(2) ?
    C28 C29 C30 C31 . . . . 1.3(4) ?
    C29 C30 C31 C32 . . . . 0.1(4) ?
    C30 C31 C32 C33 . . . . -1.8(4) ?
    C29 C28 C33 C32 . . . . -0.9(4) ?
    P2 C28 C33 C32 . . . . 178.2(2) ?
    C31 C32 C33 C28 . . . . 2.2(4) ?
    C27 P2 C34 C35 . . . . -44.5(2) ?
    C28 P2 C34 C35 . . . . -148.2(2) ?
    Mn1 P2 C34 C35 . . . . 79.0(2) ?
    C27 P2 C34 C39 . . . . 140.9(2) ?
    C28 P2 C34 C39 . . . . 37.2(2) ?
    Mn1 P2 C34 C39 . . . . -95.6(2) ?
    C39 C34 C35 C36 . . . . -0.5(4) ?
    P2 C34 C35 C36 . . . . -175.3(2) ?
    C34 C35 C36 C37 . . . . 0.2(5) ?
    C35 C36 C37 C38 . . . . 0.2(5) ?
    C36 C37 C38 C39 . . . . -0.2(5) ?
    C35 C34 C39 C38 . . . . 0.5(4) ?
    P2 C34 C39 C38 . . . . 175.2(2) ?
    C37 C38 C39 C34 . . . . -0.1(5) ?
    N6 Mn2 N5 C42 . . . . -176.09(19) ?
    N4 Mn2 N5 C42 . . . . 5.24(18) ?
    P4 Mn2 N5 C42 . . . . 100.95(18) ?
    P3 Mn2 N5 C42 . . . . -74.05(18) ?
    N6 Mn2 N5 C46 . . . . -1.61(17) ?
    N4 Mn2 N5 C46 . . . . 179.71(19) ?
    P4 Mn2 N5 C46 . . . . -84.57(18) ?
    P3 Mn2 N5 C46 . . . . 100.42(17) ?
    C49 N4 C41 C42 . . . . 175.8(2) ?
    Mn2 N4 C41 C42 . . . . 3.6(3) ?
    C49 N4 C41 C40 . . . . -2.5(4) ?
    Mn2 N4 C41 C40 . . . . -174.7(2) ?
    C46 N5 C42 C43 . . . . -0.4(3) ?
    Mn2 N5 C42 C43 . . . . 174.09(19) ?
    C46 N5 C42 C41 . . . . -179.2(2) ?
    Mn2 N5 C42 C41 . . . . -4.7(3) ?
    N4 C41 C42 N5 . . . . 0.5(3) ?
    C40 C41 C42 N5 . . . . 178.8(2) ?
    N4 C41 C42 C43 . . . . -178.2(3) ?
    C40 C41 C42 C43 . . . . 0.2(4) ?
    N5 C42 C43 C44 . . . . 0.2(4) ?
    C41 C42 C43 C44 . . . . 178.7(3) ?
    C42 C43 C44 C45 . . . . 0.2(4) ?
    C43 C44 C45 C46 . . . . -0.4(4) ?
    C42 N5 C46 C45 . . . . 0.2(3) ?
    Mn2 N5 C46 C45 . . . . -174.31(18) ?
    C42 N5 C46 C47 . . . . 177.8(2) ?
    Mn2 N5 C46 C47 . . . . 3.3(3) ?
    C44 C45 C46 N5 . . . . 0.2(4) ?
    C44 C45 C46 C47 . . . . -176.9(3) ?
    C64 N6 C47 C46 . . . . 176.6(2) ?
    Mn2 N6 C47 C46 . . . . 2.5(3) ?
    C64 N6 C47 C48 . . . . -3.3(4) ?
    Mn2 N6 C47 C48 . . . . -177.4(2) ?
    N5 C46 C47 N6 . . . . -3.5(3) ?
    C45 C46 C47 N6 . . . . 173.8(2) ?
    N5 C46 C47 C48 . . . . 176.3(2) ?
    C45 C46 C47 C48 . . . . -6.4(4) ?
    C41 N4 C49 C50 . . . . -90.8(3) ?
    Mn2 N4 C49 C50 . . . . 80.8(2) ?
    N4 C49 C50 C51 . . . . -62.7(3) ?
    C49 C50 C51 P3 . . . . 54.5(3) ?
    C52 P3 C51 C50 . . . . 178.65(19) ?
    C58 P3 C51 C50 . . . . 72.6(2) ?
    Mn2 P3 C51 C50 . . . . -51.8(2) ?
    C58 P3 C52 C53 . . . . -4.2(2) ?
    C51 P3 C52 C53 . . . . -111.2(2) ?
    Mn2 P3 C52 C53 . . . . 124.79(19) ?
    C58 P3 C52 C57 . . . . 177.2(2) ?
    C51 P3 C52 C57 . . . . 70.1(2) ?
    Mn2 P3 C52 C57 . . . . -53.8(2) ?
    C57 C52 C53 C54 . . . . 0.3(4) ?
    P3 C52 C53 C54 . . . . -178.35(19) ?
    C52 C53 C54 C55 . . . . -0.6(4) ?
    C53 C54 C55 C56 . . . . 0.4(4) ?
    C54 C55 C56 C57 . . . . 0.2(4) ?
    C55 C56 C57 C52 . . . . -0.5(4) ?
    C53 C52 C57 C56 . . . . 0.3(4) ?
    P3 C52 C57 C56 . . . . 178.9(2) ?
    C52 P3 C58 C59 . . . . 88.4(2) ?
    C51 P3 C58 C59 . . . . -166.68(19) ?
    Mn2 P3 C58 C59 . . . . -44.0(2) ?
    C52 P3 C58 C63 . . . . -94.2(2) ?
    C51 P3 C58 C63 . . . . 10.7(2) ?
    Mn2 P3 C58 C63 . . . . 133.3(2) ?
    C63 C58 C59 C60 . . . . 0.7(4) ?
    P3 C58 C59 C60 . . . . 178.25(19) ?
    C58 C59 C60 C61 . . . . -1.1(4) ?
    C59 C60 C61 C62 . . . . 0.5(4) ?
    C60 C61 C62 C63 . . . . 0.5(4) ?
    C61 C62 C63 C58 . . . . -1.0(4) ?
    C59 C58 C63 C62 . . . . 0.3(4) ?
    P3 C58 C63 C62 . . . . -177.0(2) ?
    C47 N6 C64 C65 . . . . -102.8(2) ?
    Mn2 N6 C64 C65 . . . . 70.8(3) ?
    N6 C64 C65 C66 . . . . -69.9(3) ?
    C64 C65 C66 P4 . . . . 63.2(3) ?
    C73 P4 C66 C65 . . . . 177.93(18) ?
    C67 P4 C66 C65 . . . . 74.8(2) ?
    Mn2 P4 C66 C65 . . . . -51.0(2) ?
    C73 P4 C67 C68 . . . . 124.3(2) ?
    C66 P4 C67 C68 . . . . -131.7(2) ?
    Mn2 P4 C67 C68 . . . . -10.2(2) ?
    C73 P4 C67 C72 . . . . -56.0(2) ?
    C66 P4 C67 C72 . . . . 48.0(2) ?
    Mn2 P4 C67 C72 . . . . 169.44(18) ?
    C72 C67 C68 C69 . . . . 0.6(4) ?
    P4 C67 C68 C69 . . . . -179.7(2) ?
    C67 C68 C69 C70 . . . . -1.4(4) ?
    C68 C69 C70 C71 . . . . 0.7(4) ?
    C69 C70 C71 C72 . . . . 0.8(4) ?
    C70 C71 C72 C67 . . . . -1.5(4) ?
    C68 C67 C72 C71 . . . . 0.8(4) ?
    P4 C67 C72 C71 . . . . -178.9(2) ?
    C66 P4 C73 C78 . . . . -131.9(2) ?
    C67 P4 C73 C78 . . . . -29.2(2) ?
    Mn2 P4 C73 C78 . . . . 103.3(2) ?
    C66 P4 C73 C74 . . . . 51.1(2) ?
    C67 P4 C73 C74 . . . . 153.8(2) ?
    Mn2 P4 C73 C74 . . . . -73.6(2) ?
    C78 C73 C74 C75 . . . . 0.5(4) ?
    P4 C73 C74 C75 . . . . 177.6(2) ?
    C73 C74 C75 C76 . . . . 0.2(5) ?
    C74 C75 C76 C77 . . . . -0.9(5) ?
    C75 C76 C77 C78 . . . . 0.8(5) ?
    C76 C77 C78 C73 . . . . 0.0(4) ?
    C74 C73 C78 C77 . . . . -0.6(4) ?
    P4 C73 C78 C77 . . . . -177.7(2) ?

loop_
    _geom_hbond_atom_site_label_D
    _geom_hbond_atom_site_label_H
    _geom_hbond_atom_site_label_A
    _geom_hbond_site_symmetry_A
    _geom_hbond_distance_DH
    _geom_hbond_distance_HA
    _geom_hbond_distance_DA
    _geom_hbond_angle_DHA
    _geom_hbond_publ_flag
    C18 H18 N2 . 0.95 2.50 3.378(3) 153.5 ?


# start Validation Reply Form
_vrf_PLAT906_Ph2PPrPDIMnH
;
PROBLEM: Large K value in the Analysis of Variance ......      2.004 Check 
RESPONSE: Large K appears only in the weakest data (0.000 < Fc/Fc(max) < 0.012),
probably due to signal/noise effects.
;
_vrf_PLAT910_Ph2PPrPDIMnH
;
PROBLEM: Missing # of FCF Reflection(s) Below Theta(Min)           5 Note  
RESPONSE: Small data collection strategy error.
;
# end Validation Reply Form


_shelx_res_file                         
;
     Tufan_1_200_0m.res created by SHELXL-2014/7


TITL Tufan_1_200_0m in P-1
CELL 0.71073 10.6382 17.4039 18.8993 79.892 87.553 77.840
ZERR 4.00 0.0004 0.0007 0.0007 0.001 0.001 0.001
LATT 1
SFAC C  H  N  P  Mn
UNIT 156  168  12  8  4
L.S. 4
ACTA 50
BOND $H
FMAP 2
PLAN -5
HTAB C18 N2
HTAB C68 N5
CONF
HTAB
SIZE 0.075 0.090 0.200
TEMP -150.000
WGHT    0.040700    0.999000
FVAR       0.09987
MN1   5    0.834484    0.742311    0.377038    11.00000    0.01881    0.01774 =
         0.01866   -0.00174   -0.00241   -0.00526
P1    4    0.769467    0.850738    0.425254    11.00000    0.01994    0.02252 =
         0.01800   -0.00347    0.00118   -0.00610
P2    4    0.733811    0.641307    0.392085    11.00000    0.01651    0.01789 =
         0.01999   -0.00210   -0.00022   -0.00373
N1    3    0.965527    0.709339    0.451136    11.00000    0.02521    0.02130 =
         0.02088    0.00068   -0.00570   -0.00665
N2    3    0.982795    0.742641    0.321263    11.00000    0.02039    0.01492 =
         0.02060   -0.00391   -0.00285   -0.00503
N3    3    0.760250    0.776379    0.281424    11.00000    0.01939    0.01607 =
         0.02224   -0.00267   -0.00385   -0.00336
C1    1    1.201131    0.693586    0.479698    11.00000    0.02787    0.04118 =
         0.03724    0.00119   -0.01223   -0.00764
AFIX 137
H1A   2    1.186020    0.733065    0.511907    11.00000   -1.50000
H1B   2    1.279479    0.697944    0.451422    11.00000   -1.50000
H1C   2    1.211193    0.639904    0.508182    11.00000   -1.50000
AFIX   0
C2    1    1.088632    0.708698    0.429946    11.00000    0.02374    0.02161 =
         0.02812   -0.00013   -0.00938   -0.00465
C3    1    1.101829    0.727676    0.353946    11.00000    0.01900    0.01717 =
         0.03082   -0.00393   -0.00557   -0.00167
C4    1    1.211331    0.736200    0.312182    11.00000    0.01639    0.02450 =
         0.03999   -0.00469   -0.00360   -0.00167
AFIX  43
H4    2    1.293009    0.726227    0.334339    11.00000   -1.20000
AFIX   0
C5    1    1.200211    0.759249    0.238356    11.00000    0.02044    0.02043 =
         0.03589   -0.00473    0.00597   -0.00339
AFIX  43
H5    2    1.274492    0.765917    0.210179    11.00000   -1.20000
AFIX   0
C6    1    1.081969    0.772719    0.205047    11.00000    0.02844    0.02001 =
         0.02406   -0.00480    0.00045   -0.00300
AFIX  43
H6    2    1.075408    0.787213    0.154277    11.00000   -1.20000
AFIX   0
C7    1    0.973145    0.764753    0.246858    11.00000    0.02167    0.01504 =
         0.02217   -0.00518    0.00142   -0.00480
C8    1    0.842670    0.779994    0.225725    11.00000    0.02476    0.01742 =
         0.01912   -0.00170   -0.00154   -0.00604
C9    1    0.802485    0.796868    0.148182    11.00000    0.02904    0.03453 =
         0.02094   -0.00221   -0.00353   -0.00991
AFIX 137
H9A   2    0.752510    0.758060    0.139761    11.00000   -1.50000
H9B   2    0.879105    0.792697    0.117263    11.00000   -1.50000
H9C   2    0.749681    0.850833    0.137042    11.00000   -1.50000
AFIX   0
C10   1    0.937557    0.698609    0.528626    11.00000    0.03250    0.03045 =
         0.02154    0.00424   -0.00713   -0.01194
AFIX  23
H10A  2    1.014808    0.666964    0.555302    11.00000   -1.20000
H10B  2    0.867389    0.668815    0.539249    11.00000   -1.20000
AFIX   0
C11   1    0.897938    0.779168    0.553429    11.00000    0.03696    0.03452 =
         0.01624    0.00019   -0.00233   -0.01800
AFIX  23
H11A  2    0.965085    0.810460    0.538349    11.00000   -1.20000
H11B  2    0.893786    0.770139    0.606598    11.00000   -1.20000
AFIX   0
C12   1    0.768320    0.828228    0.523972    11.00000    0.03365    0.03069 =
         0.02113   -0.00586    0.00382   -0.01048
AFIX  23
H12A  2    0.748214    0.878767    0.543322    11.00000   -1.20000
H12B  2    0.700047    0.798206    0.540333    11.00000   -1.20000
AFIX   0
C13   1    0.862664    0.930405    0.409900    11.00000    0.02183    0.02244 =
         0.01618   -0.00310   -0.00265   -0.00500
C14   1    0.831178    0.996565    0.444160    11.00000    0.03130    0.03286 =
         0.02591   -0.01009    0.00284   -0.01191
AFIX  43
H14   2    0.761738    1.000254    0.477551    11.00000   -1.20000
AFIX   0
C15   1    0.899438    1.056926    0.430308    11.00000    0.03476    0.02603 =
         0.03540   -0.01442    0.00008   -0.00809
AFIX  43
H15   2    0.877413    1.101578    0.454308    11.00000   -1.20000
AFIX   0
C16   1    0.999616    1.052077    0.381524    11.00000    0.03499    0.02619 =
         0.03406   -0.00367   -0.00302   -0.01582
AFIX  43
H16   2    1.046865    1.093433    0.371865    11.00000   -1.20000
AFIX   0
C17   1    1.031280    0.987351    0.346774    11.00000    0.03176    0.03355 =
         0.03034   -0.00941    0.00836   -0.01299
AFIX  43
H17   2    1.099908    0.984300    0.312852    11.00000   -1.20000
AFIX   0
C18   1    0.963118    0.926573    0.361218    11.00000    0.02731    0.02311 =
         0.02459   -0.00731    0.00242   -0.00882
AFIX  43
H18   2    0.985885    0.881866    0.337328    11.00000   -1.20000
AFIX   0
C19   1    0.609336    0.910177    0.401062    11.00000    0.02131    0.02451 =
         0.02401   -0.01292    0.00256   -0.00311
C20   1    0.497747    0.889266    0.432341    11.00000    0.02857    0.03980 =
         0.03102   -0.01441    0.00591   -0.00955
AFIX  43
H20   2    0.503727    0.846241    0.471526    11.00000   -1.20000
AFIX   0
C21   1    0.377259    0.930994    0.406591    11.00000    0.02152    0.05287 =
         0.05122   -0.03007    0.01215   -0.00997
AFIX  43
H21   2    0.301578    0.916064    0.427973    11.00000   -1.20000
AFIX   0
C22   1    0.367874    0.994006    0.350031    11.00000    0.02991    0.04000 =
         0.04722   -0.02048   -0.00527    0.00355
AFIX  43
H22   2    0.285690    1.023167    0.333279    11.00000   -1.20000
AFIX   0
C23   1    0.477102    1.014587    0.317965    11.00000    0.03161    0.03101 =
         0.03977   -0.01394   -0.00651   -0.00044
AFIX  43
H23   2    0.470419    1.057250    0.278418    11.00000   -1.20000
AFIX   0
C24   1    0.596542    0.973380    0.343112    11.00000    0.02509    0.03111 =
         0.03017   -0.00984   -0.00331   -0.00277
AFIX  43
H24   2    0.671507    0.988223    0.320636    11.00000   -1.20000
AFIX   0
C25   1    0.623003    0.791267    0.265651    11.00000    0.02094    0.02062 =
         0.02113    0.00020   -0.00438   -0.00466
AFIX  23
H25A  2    0.607429    0.820714    0.215976    11.00000   -1.20000
H25B  2    0.574241    0.824999    0.298831    11.00000   -1.20000
AFIX   0
C26   1    0.574609    0.713483    0.273536    11.00000    0.01867    0.02437 =
         0.02678   -0.00503   -0.00455   -0.00465
AFIX  23
H26A  2    0.486495    0.725226    0.253930    11.00000   -1.20000
H26B  2    0.630377    0.677397    0.244652    11.00000   -1.20000
AFIX   0
C27   1    0.572883    0.670841    0.351344    11.00000    0.01874    0.01941 =
         0.02904   -0.00513   -0.00293   -0.00503
AFIX  23
H27A  2    0.536556    0.622657    0.352950    11.00000   -1.20000
H27B  2    0.515892    0.706507    0.380105    11.00000   -1.20000
AFIX   0
C28   1    0.801880    0.552247    0.351675    11.00000    0.01900    0.02090 =
         0.01895    0.00069   -0.00143   -0.00369
C29   1    0.734667    0.491560    0.350302    11.00000    0.02396    0.02574 =
         0.03476   -0.00746    0.00079   -0.00559
AFIX  43
H29   2    0.650811    0.495545    0.370650    11.00000   -1.20000
AFIX   0
C30   1    0.789410    0.425936    0.319575    11.00000    0.03405    0.02036 =
         0.03458   -0.00464   -0.00755   -0.00397
AFIX  43
H30   2    0.742350    0.385540    0.318026    11.00000   -1.20000
AFIX   0
C31   1    0.911963    0.418671    0.291123    11.00000    0.03749    0.02238 =
         0.02633   -0.01000   -0.00084    0.00419
AFIX  43
H31   2    0.949352    0.373458    0.269955    11.00000   -1.20000
AFIX   0
C32   1    0.979919    0.477308    0.293547    11.00000    0.02889    0.03601 =
         0.04180   -0.01077    0.01147   -0.00551
AFIX  43
H32   2    1.065331    0.471787    0.275247    11.00000   -1.20000
AFIX   0
C33   1    0.923937    0.544543    0.322683    11.00000    0.02703    0.02603 =
         0.03495   -0.00722    0.00531   -0.00851
AFIX  43
H33   2    0.970352    0.585598    0.322594    11.00000   -1.20000
AFIX   0
C34   1    0.698962    0.594753    0.483476    11.00000    0.02726    0.02270 =
         0.02166   -0.00190   -0.00169   -0.01367
C35   1    0.595694    0.630179    0.522363    11.00000    0.03594    0.03345 =
         0.02934   -0.00482    0.00530   -0.01234
AFIX  43
H35   2    0.538825    0.676978    0.499909    11.00000   -1.20000
AFIX   0
C36   1    0.574213    0.598600    0.593063    11.00000    0.05882    0.04549 =
         0.03172   -0.00672    0.01371   -0.02350
AFIX  43
H36   2    0.502896    0.623634    0.618643    11.00000   -1.20000
AFIX   0
C37   1    0.655178    0.531517    0.626280    11.00000    0.08723    0.04685 =
         0.02332   -0.00252    0.00620   -0.03087
AFIX  43
H37   2    0.640041    0.509846    0.674858    11.00000   -1.20000
AFIX   0
C38   1    0.758484    0.495398    0.589432    11.00000    0.07420    0.03015 =
         0.03300    0.00811   -0.01676   -0.01481
AFIX  43
H38   2    0.814831    0.448835    0.612726    11.00000   -1.20000
AFIX   0
C39   1    0.781263    0.526655    0.517948    11.00000    0.04248    0.02688 =
         0.02730   -0.00176   -0.00548   -0.01071
AFIX  43
H39   2    0.853027    0.501403    0.492819    11.00000   -1.20000
AFIX   0
MN2   5    0.508892    0.749089    0.873872    11.00000    0.01803    0.01609 =
         0.01769   -0.00114    0.00092   -0.00357
P3    4    0.500948    0.860282    0.916917    11.00000    0.01734    0.01879 =
         0.01605   -0.00199   -0.00070   -0.00322
P4    4    0.668113    0.643900    0.880365    11.00000    0.01809    0.01613 =
         0.01987   -0.00163   -0.00001   -0.00387
N4    3    0.413994    0.719335    0.961522    11.00000    0.02534    0.01929 =
         0.01874   -0.00094    0.00062   -0.00427
N5    3    0.349375    0.750799    0.836054    11.00000    0.01858    0.01498 =
         0.02314   -0.00188    0.00059   -0.00377
N6    3    0.543159    0.776917    0.771502    11.00000    0.01953    0.01569 =
         0.01910   -0.00171    0.00079   -0.00200
C40   1    0.196252    0.706246    1.015265    11.00000    0.02984    0.04320 =
         0.02899    0.00347    0.00978   -0.01202
AFIX 137
H40A  2    0.215963    0.649861    1.037578    11.00000   -1.50000
H40B  2    0.108104    0.720291    0.996948    11.00000   -1.50000
H40C  2    0.204582    0.739322    1.051068    11.00000   -1.50000
AFIX   0
C41   1    0.288630    0.720486    0.954100    11.00000    0.02336    0.02170 =
         0.02528    0.00078    0.00602   -0.00660
C42   1    0.246907    0.738980    0.881665    11.00000    0.02214    0.01784 =
         0.02534   -0.00243    0.00232   -0.00502
C43   1    0.124739    0.747385    0.854080    11.00000    0.02228    0.02560 =
         0.04167   -0.00301    0.00637   -0.00860
AFIX  43
H43   2    0.054695    0.739426    0.885433    11.00000   -1.20000
AFIX   0
C44   1    0.105813    0.767645    0.779828    11.00000    0.02444    0.02999 =
         0.04109   -0.00675   -0.00719   -0.00721
AFIX  43
H44   2    0.022449    0.773606    0.760761    11.00000   -1.20000
AFIX   0
C45   1    0.207299    0.779052    0.734012    11.00000    0.02833    0.02551 =
         0.02786   -0.00527   -0.00474   -0.00615
AFIX  43
H45   2    0.193755    0.792482    0.683599    11.00000   -1.20000
AFIX   0
C46   1    0.330093    0.770836    0.761812    11.00000    0.02678    0.01493 =
         0.02218   -0.00402   -0.00250   -0.00244
C47   1    0.446145    0.782956    0.726057    11.00000    0.02431    0.01877 =
         0.01843   -0.00358   -0.00161   -0.00218
C48   1    0.454850    0.800480    0.645248    11.00000    0.03531    0.03248 =
         0.02293   -0.00601    0.00058   -0.00667
AFIX 137
H48A  2    0.470827    0.854392    0.629996    11.00000   -1.50000
H48B  2    0.373864    0.796777    0.624554    11.00000   -1.50000
H48C  2    0.525523    0.761670    0.628636    11.00000   -1.50000
AFIX   0
C49   1    0.466921    0.706390    1.034072    11.00000    0.02839    0.02687 =
         0.01903    0.00271    0.00335   -0.00367
AFIX  23
H49A  2    0.557783    0.677742    1.033955    11.00000   -1.20000
H49B  2    0.418282    0.672867    1.067654    11.00000   -1.20000
AFIX   0
C50   1    0.458908    0.785883    1.059600    11.00000    0.02854    0.03339 =
         0.01571   -0.00128   -0.00023   -0.00268
AFIX  23
H50A  2    0.489271    0.775187    1.109861    11.00000   -1.20000
H50B  2    0.367810    0.814191    1.059166    11.00000   -1.20000
AFIX   0
C51   1    0.538415    0.840457    1.013440    11.00000    0.02280    0.02769 =
         0.01980   -0.00544   -0.00307   -0.00284
AFIX  23
H51A  2    0.630786    0.815582    1.019797    11.00000   -1.20000
H51B  2    0.523493    0.891911    1.031160    11.00000   -1.20000
AFIX   0
C52   1    0.609444    0.927518    0.881729    11.00000    0.02212    0.02000 =
         0.01598   -0.00629   -0.00040   -0.00431
C53   1    0.565946    1.007828    0.854221    11.00000    0.02147    0.02323 =
         0.02233   -0.00667   -0.00136   -0.00387
AFIX  43
H53   2    0.476402    1.030132    0.854383    11.00000   -1.20000
AFIX   0
C54   1    0.651420    1.056025    0.826478    11.00000    0.02938    0.02156 =
         0.02644   -0.00380   -0.00097   -0.00678
AFIX  43
H54   2    0.619887    1.110685    0.807463    11.00000   -1.20000
AFIX   0
C55   1    0.782086    1.024767    0.826437    11.00000    0.02764    0.02891 =
         0.02692   -0.00722    0.00190   -0.01443
AFIX  43
H55   2    0.840522    1.057805    0.807734    11.00000   -1.20000
AFIX   0
C56   1    0.827065    0.945149    0.853788    11.00000    0.01885    0.02987 =
         0.04090   -0.01100    0.00088   -0.00507
AFIX  43
H56   2    0.916773    0.923256    0.854058    11.00000   -1.20000
AFIX   0
C57   1    0.741589    0.897280    0.880780    11.00000    0.02451    0.01959 =
         0.03520   -0.00631   -0.00292   -0.00470
AFIX  43
H57   2    0.773668    0.842500    0.899108    11.00000   -1.20000
AFIX   0
C58   1    0.342650    0.928121    0.911072    11.00000    0.01637    0.01880 =
         0.02226   -0.00201    0.00249   -0.00536
C59   1    0.276292    0.940460    0.846623    11.00000    0.02174    0.02104 =
         0.02025   -0.00287   -0.00047   -0.00440
AFIX  43
H59   2    0.314667    0.915354    0.807975    11.00000   -1.20000
AFIX   0
C60   1    0.154751    0.989091    0.838560    11.00000    0.02597    0.02573 =
         0.03005   -0.00168   -0.00902   -0.00758
AFIX  43
H60   2    0.110844    0.997965    0.794200    11.00000   -1.20000
AFIX   0
C61   1    0.097468    1.024628    0.894903    11.00000    0.01951    0.02324 =
         0.04346   -0.00589   -0.00303   -0.00105
AFIX  43
H61   2    0.013870    1.057558    0.889358    11.00000   -1.20000
AFIX   0
C62   1    0.160952    1.012534    0.958990    11.00000    0.02322    0.02886 =
         0.03172   -0.00914    0.00743   -0.00604
AFIX  43
H62   2    0.120799    1.036790    0.997729    11.00000   -1.20000
AFIX   0
C63   1    0.283729    0.964935    0.967364    11.00000    0.02430    0.02425 =
         0.02285   -0.00363    0.00084   -0.00706
AFIX  43
H63   2    0.327674    0.957440    1.011555    11.00000   -1.20000
AFIX   0
C64   1    0.670267    0.783887    0.740199    11.00000    0.02288    0.02383 =
         0.01984    0.00004    0.00179   -0.00559
AFIX  23
H64A  2    0.708153    0.818562    0.765702    11.00000   -1.20000
H64B  2    0.659920    0.809415    0.689098    11.00000   -1.20000
AFIX   0
C65   1    0.761542    0.702772    0.745329    11.00000    0.02106    0.02712 =
         0.02375   -0.00297    0.00706   -0.00549
AFIX  23
H65A  2    0.838592    0.708966    0.715378    11.00000   -1.20000
H65B  2    0.718426    0.666132    0.725455    11.00000   -1.20000
AFIX   0
C66   1    0.804333    0.665159    0.822352    11.00000    0.01880    0.02218 =
         0.02829   -0.00440    0.00310   -0.00418
AFIX  23
H66A  2    0.846533    0.701884    0.842712    11.00000   -1.20000
H66B  2    0.868201    0.614930    0.821459    11.00000   -1.20000
AFIX   0
C67   1    0.639565    0.555389    0.847557    11.00000    0.02690    0.01688 =
         0.02065   -0.00012   -0.00101   -0.00618
C68   1    0.514927    0.552265    0.830747    11.00000    0.02959    0.02091 =
         0.02843   -0.00414    0.00166   -0.00597
AFIX  43
H68   2    0.446100    0.595599    0.836042    11.00000   -1.20000
AFIX   0
C69   1    0.490583    0.486250    0.806304    11.00000    0.03240    0.02741 =
         0.03416   -0.00335   -0.00410   -0.01206
AFIX  43
H69   2    0.405016    0.483927    0.795899    11.00000   -1.20000
AFIX   0
C70   1    0.590830    0.423809    0.797074    11.00000    0.05070    0.02285 =
         0.02342   -0.00355   -0.00230   -0.01558
AFIX  43
H70   2    0.574090    0.378877    0.779831    11.00000   -1.20000
AFIX   0
C71   1    0.715235    0.426526    0.812835    11.00000    0.04107    0.01928 =
         0.02702   -0.00311    0.00035   -0.00276
AFIX  43
H71   2    0.784109    0.383841    0.805909    11.00000   -1.20000
AFIX   0
C72   1    0.739255    0.491487    0.838699    11.00000    0.02625    0.02351 =
         0.02824   -0.00341   -0.00014   -0.00384
AFIX  43
H72   2    0.824648    0.492615    0.850577    11.00000   -1.20000
AFIX   0
C73   1    0.749037    0.596942    0.965661    11.00000    0.01953    0.02111 =
         0.01985   -0.00115    0.00014    0.00066
C74   1    0.833541    0.633881    0.995265    11.00000    0.02895    0.03160 =
         0.02972    0.00493   -0.00557   -0.01039
AFIX  43
H74   2    0.851355    0.682642    0.969948    11.00000   -1.20000
AFIX   0
C75   1    0.891794    0.600904    1.060682    11.00000    0.03671    0.05481 =
         0.03562   -0.00016   -0.01313   -0.01475
AFIX  43
H75   2    0.948758    0.627156    1.079951    11.00000   -1.20000
AFIX   0
C76   1    0.867512    0.529959    1.098129    11.00000    0.03757    0.05295 =
         0.03012    0.01029   -0.01035   -0.00150
AFIX  43
H76   2    0.908505    0.506829    1.142777    11.00000   -1.20000
AFIX   0
C77   1    0.783157    0.492894    1.070157    11.00000    0.04414    0.03265 =
         0.03270    0.00714    0.00004   -0.00537
AFIX  43
H77   2    0.765255    0.444409    1.096042    11.00000   -1.20000
AFIX   0
C78   1    0.724402    0.525838    1.004642    11.00000    0.03131    0.02639 =
         0.02564   -0.00201    0.00113   -0.00488
AFIX  43
H78   2    0.666588    0.499645    0.986041    11.00000   -1.20000
AFIX   0
H1M   2    0.706181    0.750239    0.422219    11.00000    0.04097
H2M   2    0.635960    0.758246    0.899983    11.00000    0.04007
HKLF 4 1 1 0 0 0 1 0 0 0 1

REM  Tufan_1_200_0m in P-1
REM R1 =  0.0416 for    9258 Fo > 4sig(Fo)  and  0.0641 for all   12336 data
REM    823 parameters refined using      0 restraints

END

WGHT      0.0407      0.9990

REM Instructions for potential hydrogen bonds
HTAB C18 N2
HTAB C68 N5

REM Highest difference peak  0.376,  deepest hole -0.447,  1-sigma level  0.062
Q1    1   0.6445  0.6014  0.8591  11.00000  0.05    0.38
Q2    1   0.9148  0.7258  0.3509  11.00000  0.05    0.35
Q3    1   0.5504  0.7994  0.8828  11.00000  0.05    0.30
Q4    1   0.6042  0.7445  0.8515  11.00000  0.05    0.28
Q5    1   0.5208  0.7854  0.9203  11.00000  0.05    0.28
;
_shelx_res_checksum                     95302

_shelx_hkl_file                         
;
  -2   0   0   44.29    0.99
   2   0   0   43.11    1.02
   2   0   0   44.25    1.01
  -3   0   0  226.35    4.32
   3   0   0  227.84    4.43
   3   0   0  221.92    4.39
  -4   0   0   83.69    1.86
   4   0   0   82.89    1.89
   4   0   0   83.82    1.92
  -5   0   0    0.39    0.28
   5   0   0    1.28    0.36
   5   0   0    0.63    0.32
  -6   0   0   13.55    0.73
   6   0   0   15.17    0.79
   6   0   0   15.27    0.77
  -7   0   0   20.35    0.92
   7   0   0   21.87    0.98
   7   0   0   22.58    1.00
  -8   0   0   16.80    0.90
   8   0   0   17.45    0.95
   8   0   0   16.49    0.99
  -9   0   0    5.60    0.66
   9   0   0    5.81    0.69
   9   0   0    5.53    0.72
 -10   0   0    1.17    0.51
  10   0   0    0.61    0.51
  10   0   0    0.45    0.49
 -11   0   0    0.33    0.51
  11   0   0    0.17    0.53
  11   0   0    0.30    0.50
  12   0   0   18.16    1.20
  12   0   0   15.21    1.25
  12  -1   0    3.83    0.72
  12  -1   0    5.01    0.85
  11  -1   0   10.40    0.96
  11  -1   0   10.50    1.02
 -11   1   0   10.48    0.95
  10  -1   0    0.69    0.51
  10  -1   0    0.24    0.47
 -10   1   0   -0.07    0.48
   9  -1   0    9.31    0.82
   9  -1   0   10.69    0.93
  -9   1   0   12.25    0.91
   8  -1   0   32.49    1.34
   8  -1   0   32.03    1.24
  -8   1   0   33.07    1.24
   7  -1   0    6.50    0.61
   7  -1   0    5.34    0.59
  -7   1   0    6.15    0.60
   6  -1   0   17.57    0.81
   6  -1   0   18.15    0.85
  -6   1   0   18.30    0.83
   5  -1   0    4.59    0.45
   5  -1   0    4.65    0.48
  -5   1   0    5.57    0.48
   4  -1   0   48.07    1.23
   4  -1   0   48.44    1.31
  -4   1   0   46.42    1.23
   3  -1   0    7.88    0.49
   3  -1   0    9.00    0.49
  -3   1   0    8.52    0.50
   2  -1   0   89.51    1.88
   2  -1   0   87.33    1.80
  -2   1   0   89.42    1.81
   1  -1   0   75.27    1.55
  -1   1   0   78.00    1.51
  -1  -1   0  176.08    3.32
   1   1   0  181.26    3.39
  -2  -1   0   54.45    1.18
   2   1   0   55.21    1.17
   2   1   0   54.25    1.22
  -3  -1   0    1.71    0.28
   3   1   0    1.08    0.27
   3   1   0    1.07    0.29
  -4  -1   0   -0.35    0.24
   4   1   0    0.48    0.27
   4   1   0    0.09    0.25
  -5  -1   0    0.00    0.27
   5   1   0   -0.14    0.29
   5   1   0    0.37    0.29
  -6  -1   0    8.69    0.60
   6   1   0    8.83    0.65
   6   1   0    8.42    0.61
  -7  -1   0   15.40    0.80
   7   1   0   15.46    0.82
   7   1   0   15.91    0.88
  -8  -1   0    2.68    0.51
   8   1   0    2.21    0.50
   8   1   0    2.44    0.50
  -9  -1   0   27.04    1.15
   9   1   0   24.85    1.21
   9   1   0   26.00    1.22
 -10  -1   0    1.44    0.50
  10   1   0    1.95    0.56
  10   1   0    1.14    0.53
 -11  -1   0    2.23    0.54
  11   1   0    2.84    0.75
  11   1   0    2.10    0.64
  12   1   0    2.66    0.64
  12  -2   0   13.87    1.24
  11  -2   0    8.15    0.86
  11  -2   0    8.00    0.97
 -11   2   0    7.72    0.86
  10  -2   0    0.61    0.53
  10  -2   0    0.34    0.44
 -10   2   0   -0.12    0.45
   9  -2   0    0.29    0.42
   9  -2   0   -0.47    0.46
  -9   2   0   -0.01    0.44
   8  -2   0    1.10    0.44
   8  -2   0    0.36    0.45
  -8   2   0    0.16    0.41
   7  -2   0    0.43    0.42
   7  -2   0   -0.04    0.32
  -7   2   0    0.29    0.35
   6  -2   0    1.65    0.35
   6  -2   0    1.38    0.42
  -6   2   0    1.79    0.42
   5  -2   0   14.49    0.74
   5  -2   0   13.73    0.69
  -5   2   0   14.27    0.71
   4  -2   0   66.45    1.55
   4  -2   0   64.80    1.68
  -4   2   0   66.89    1.59
   3  -2   0   70.72    1.56
   3  -2   0   68.79    1.68
  -3   2   0   75.59    1.64
   2  -2   0    0.27    0.25
   2  -2   0    0.41    0.20
  -2   2   0    0.17    0.24
   1  -2   0    1.68    0.23
  -1   2   0    1.44    0.21
   0  -2   0  135.23    2.64
   0  -2   0  139.94    2.66
  -1  -2   0   41.65    0.91
   1   2   0   42.49    0.93
  -2  -2   0  137.25    2.68
  -2  -2   0  137.34    2.65
   2   2   0  136.66    2.74
  -3  -2   0  180.91    3.50
   3   2   0  179.29    3.61
   3   2   0  176.90    3.50
  -4  -2   0    1.39    0.31
   4   2   0    1.47    0.34
   4   2   0    1.59    0.29
  -5  -2   0    4.77    0.45
   5   2   0    5.01    0.43
   5   2   0    4.25    0.47
  -6  -2   0   45.85    1.32
   6   2   0   47.04    1.41
   6   2   0   48.17    1.33
  -7  -2   0   24.50    0.97
   7   2   0   23.39    0.96
   7   2   0   25.02    1.08
  -8  -2   0    6.19    0.62
   8   2   0    5.42    0.60
   8   2   0    4.51    0.64
  -9  -2   0   -0.10    0.42
   9   2   0    0.39    0.43
   9   2   0    1.14    0.47
 -10  -2   0    0.48    0.47
  10   2   0    1.73    0.51
  10   2   0    0.66    0.50
 -11  -2   0    1.38    0.56
 -11  -2   0    1.32    0.49
  11   2   0    1.12    0.59
 -12  -2   0    1.18    0.59
  12   2   0   -0.10    0.51
  12  -3   0    2.40    0.72
  11  -3   0    3.67    0.80
 -11   3   0    5.87    0.80
  10  -3   0    0.99    0.62
  10  -3   0    0.72    0.47
 -10   3   0    0.59    0.54
   9  -3   0    7.50    0.85
   9  -3   0    6.51    0.72
  -9   3   0    7.33    0.77
   8  -3   0   37.57    1.48
   8  -3   0   37.28    1.31
  -8   3   0   38.31    1.38
   7  -3   0    0.70    0.36
   7  -3   0    0.71    0.44
  -7   3   0    0.34    0.39
   6  -3   0    0.19    0.36
   6  -3   0    0.20    0.29
  -6   3   0    0.20    0.31
   5  -3   0   18.05    0.84
   5  -3   0   17.23    0.71
  -5   3   0   16.66    0.79
   4  -3   0   45.49    1.16
   4  -3   0   45.34    1.35
  -4   3   0   43.91    1.24
   3  -3   0   19.83    0.77
   3  -3   0   18.88    0.62
  -3   3   0   19.52    0.75
   2  -3   0    1.80    0.32
   2  -3   0    1.73    0.22
  -2   3   0    1.84    0.30
   1  -3   0  143.41    2.79
   1  -3   0  151.82    2.95
  -1   3   0  145.40    2.88
   0  -3   0   20.05    0.60
   0  -3   0   20.23    0.59
   0   3   0   20.20    0.54
  -1  -3   0    2.71    0.21
  -1  -3   0    2.77    0.28
   1   3   0    3.14    0.28
  -2  -3   0    0.78    0.18
  -2  -3   0    0.73    0.24
   2   3   0    0.76    0.26
  -3  -3   0    4.12    0.38
  -3  -3   0    3.90    0.31
   3   3   0    4.10    0.39
  -4  -3   0   83.62    1.81
  -4  -3   0   85.16    1.88
   4   3   0   81.19    1.96
  -5  -3   0   -0.14    0.25
  -5  -3   0   -0.10    0.27
   5   3   0    0.31    0.34
  -6  -3   0    1.60    0.37
   6   3   0    2.53    0.36
   6   3   0    1.11    0.38
  -7  -3   0   96.11    2.29
   7   3   0   96.70    2.43
   7   3   0   92.13    2.26
  -8  -3   0    0.76    0.39
   8   3   0    0.23    0.46
  -9  -3   0    0.17    0.44
  -9  -3   0    0.04    0.42
   9   3   0   -0.06    0.40
 -10  -3   0    6.26    0.74
 -10  -3   0    6.30    0.72
  10   3   0    6.69    0.79
 -11  -3   0    1.38    0.53
 -11  -3   0    2.28    0.57
  11   3   0    0.73    0.55
  12   3   0   -0.64    0.46
  11  -4   0    0.49    0.56
 -11   4   0   -0.17    0.51
  10  -4   0   -0.13    0.50
 -10   4   0    0.20    0.49
   9  -4   0    2.76    0.66
   9  -4   0    2.47    0.51
  -9   4   0    2.88    0.62
   8  -4   0    8.18    0.69
   8  -4   0    8.17    0.86
  -8   4   0    7.98    0.77
   7  -4   0    2.62    0.43
   7  -4   0    1.94    0.51
  -7   4   0    2.42    0.48
   6  -4   0   19.00    0.82
   6  -4   0   19.66    0.98
  -6   4   0   19.14    0.91
   5  -4   0    4.26    0.42
   5  -4   0    4.69    0.57
  -5   4   0    3.45    0.47
   4  -4   0    5.67    0.53
   4  -4   0    5.78    0.41
  -4   4   0    5.31    0.49
   3  -4   0   22.28    0.68
   3  -4   0   20.88    0.83
  -3   4   0   20.87    0.81
   2  -4   0   13.22    0.48
   2  -4   0   11.99    0.65
  -2   4   0   12.13    0.63
   1  -4   0    0.26    0.26
   1  -4   0    0.33    0.18
   1  -4   0    0.59    0.26
   0  -4   0  880.27   16.54
   0  -4   0 1000.00   16.32
   0   4   0  788.12   16.41
  -1  -4   0  184.11    3.63
  -1  -4   0  183.85    3.59
   1   4   0  190.34    3.63
  -2  -4   0    0.15    0.17
  -2  -4   0    0.18    0.25
   2   4   0   -0.23    0.27
  -3  -4   0  199.50    3.85
  -3  -4   0  204.48    3.95
   3   4   0  193.88    4.02
  -4  -4   0    2.23    0.36
  -4  -4   0    2.16    0.29
   4   4   0    2.25    0.39
  -5  -4   0    0.98    0.31
  -5  -4   0   -0.14    0.24
   5   4   0    0.42    0.36
  -6  -4   0   37.16    1.09
  -6  -4   0   34.38    1.14
   6   4   0   37.72    1.30
  -7  -4   0    3.50    0.42
  -7  -4   0    3.24    0.48
   7   4   0    2.96    0.51
  -8  -4   0   20.26    0.90
  -8  -4   0   19.57    0.94
   8   4   0   20.23    1.08
  -9  -4   0    0.67    0.43
  -9  -4   0    1.00    0.46
   9   4   0    0.79    0.49
 -10  -4   0    0.14    0.43
 -10  -4   0    0.48    0.45
  10   4   0   -0.11    0.47
 -11  -4   0    9.84    0.89
 -11  -4   0   12.02    0.94
  11   4   0    9.90    1.01
  12   4   0   -0.49    0.52
  11  -5   0    5.72    0.94
 -11   5   0    4.41    0.79
  10  -5   0   16.77    1.33
 -10   5   0   15.89    1.11
   9  -5   0    9.93    0.99
  -9   5   0    7.55    0.80
   8  -5   0    3.55    0.70
   8  -5   0    4.30    0.54
  -8   5   0    4.55    0.66
   7  -5   0   23.85    0.95
   7  -5   0   22.93    1.17
  -7   5   0   24.35    1.11
   6  -5   0   -0.03    0.27
   6  -5   0    0.10    0.38
  -6   5   0   -0.01    0.36
   5  -5   0   15.99    0.92
   5  -5   0   16.12    0.67
  -5   5   0   15.50    0.83
   4  -5   0   63.69    1.49
  -4   5   0   64.38    1.68
   3  -5   0   27.40    1.00
   3  -5   0   28.93    0.78
  -3   5   0   28.91    0.98
   2  -5   0   36.84    1.14
   2  -5   0   36.31    0.87
  -2   5   0   36.52    1.09
   1  -5   0  144.31    3.00
   1  -5   0  143.92    2.80
   1  -5   0  142.60    2.96
   0  -5   0    2.58    0.35
   0  -5   0    2.38    0.33
   0   5   0    3.90    0.30
  -1  -5   0   75.86    1.63
   1   5   0   77.28    1.68
  -2  -5   0   40.56    0.96
  -2  -5   0   41.55    1.13
   2   5   0   40.06    1.08
  -3  -5   0   65.93    1.41
  -3  -5   0   65.57    1.56
   3   5   0   65.15    1.61
  -4  -5   0    0.12    0.21
  -4  -5   0    0.02    0.29
   4   5   0    0.40    0.28
  -5  -5   0   13.48    0.70
  -5  -5   0   13.46    0.60
   5   5   0   15.26    0.84
  -6  -5   0   -0.01    0.25
  -6  -5   0   -0.04    0.29
   6   5   0   -0.03    0.35
  -7  -5   0   14.16    0.74
  -7  -5   0   12.98    0.76
   7   5   0   13.68    0.87
  -8  -5   0   40.05    1.25
  -8  -5   0   37.92    1.32
   8   5   0   39.45    1.48
  -9  -5   0    1.55    0.45
  -9  -5   0    0.65    0.39
   9   5   0    1.02    0.48
 -10  -5   0    6.65    0.69
 -10  -5   0    6.53    0.72
  10   5   0    7.41    0.85
 -11  -5   0    0.37    0.47
  11   5   0    0.47    0.54
 -12  -5   0    0.90    0.55
  12   5   0    2.35    0.71
  11  -6   0   -0.82    0.63
  10  -6   0    3.90    0.78
 -10   6   0    3.91    0.75
   9  -6   0    2.27    0.68
  -9   6   0    2.23    0.63
   8  -6   0   -0.01    0.55
  -8   6   0    1.24    0.52
   7  -6   0    0.71    0.35
   7  -6   0    0.36    0.51
  -7   6   0    0.59    0.45
   6  -6   0   26.66    1.23
   6  -6   0   27.70    0.95
  -6   6   0   29.22    1.17
   5  -6   0    0.23    0.36
   5  -6   0   -0.01    0.24
  -5   6   0    0.40    0.37
   4  -6   0   12.92    0.56
   4  -6   0   13.00    0.77
  -4   6   0   11.29    0.73
   3  -6   0    1.36    0.37
   3  -6   0    1.14    0.23
  -3   6   0    1.64    0.38
   2  -6   0   26.47    0.95
   2  -6   0   26.30    0.71
  -2   6   0   26.63    0.92
   1  -6   0    0.13    0.31
   1  -6   0   -0.35    0.25
   1  -6   0    0.32    0.19
   0  -6   0   89.69    2.02
   0  -6   0   91.63    2.07
   0   6   0   91.97    1.93
  -1  -6   0   15.98    0.67
  -1  -6   0   17.09    0.64
   1   6   0   15.90    0.63
  -2  -6   0   24.14    0.86
  -2  -6   0   23.60    0.70
   2   6   0   22.82    0.83
  -3  -6   0    2.78    0.27
  -3  -6   0    2.87    0.38
   3   6   0    2.40    0.40
  -4  -6   0   20.68    0.67
  -4  -6   0   20.66    0.83
   4   6   0   21.18    0.92
  -5  -6   0   20.02    0.86
  -5  -6   0   20.60    0.71
   5   6   0   20.66    0.91
  -6  -6   0    8.30    0.54
  -6  -6   0    7.85    0.61
   6   6   0    5.42    0.61
  -7  -6   0    1.51    0.40
  -7  -6   0    1.76    0.34
   7   6   0    2.02    0.49
  -8  -6   0    7.72    0.61
  -8  -6   0    8.05    0.72
   8   6   0    7.34    0.79
  -9  -6   0   13.46    0.84
  -9  -6   0   15.62    0.92
   9   6   0   13.98    1.07
 -10  -6   0    2.35    0.56
  10   6   0    2.51    0.67
 -11  -6   0    0.76    0.49
  11   6   0    0.63    0.66
 -12  -6   0    1.92    0.59
  12   6   0    0.97    0.67
  10  -7   0   15.75    1.35
 -10   7   0   14.09    1.13
   9  -7   0   12.34    1.14
  -9   7   0   10.46    0.96
   8  -7   0   11.76    1.08
  -8   7   0   10.64    0.93
   7  -7   0   20.36    1.18
  -7   7   0   20.56    1.11
   6  -7   0    1.70    0.35
   6  -7   0    1.84    0.54
  -6   7   0    1.51    0.48
   5  -7   0    0.58    0.28
   5  -7   0    1.11    0.47
  -5   7   0    0.82    0.42
   4  -7   0   12.64    0.55
   4  -7   0   14.68    0.88
  -4   7   0   12.19    0.79
   3  -7   0   36.32    0.93
   3  -7   0   35.77    1.22
  -3   7   0   36.41    1.18
   2  -7   0   14.23    0.51
   2  -7   0   14.24    0.79
  -2   7   0   13.95    0.71
   1  -7   0    4.89    0.48
   1  -7   0    4.14    0.46
  -1   7   0    5.50    0.36
   0  -7   0    7.29    0.53
   0  -7   0    8.25    0.57
   0   7   0    7.06    0.47
  -1  -7   0    0.80    0.26
  -1  -7   0    1.15    0.32
   1   7   0    1.22    0.30
  -2  -7   0   27.53    0.80
  -2  -7   0   26.32    0.93
   2   7   0   27.75    0.93
  -3  -7   0   93.53    1.96
  -3  -7   0   92.76    2.15
   3   7   0   89.70    2.15
  -4  -7   0    4.39    0.49
  -4  -7   0    4.67    0.34
   4   7   0    4.65    0.51
  -5  -7   0    1.91    0.28
  -5  -7   0    1.56    0.36
   5   7   0    2.50    0.46
  -6  -7   0    8.57    0.68
  -6  -7   0    6.77    0.48
   6   7   0    8.58    0.73
  -7  -7   0    0.84    0.33
  -7  -7   0    1.11    0.42
   7   7   0    1.33    0.47
  -8  -7   0   16.22    0.81
  -8  -7   0   15.86    0.90
   8   7   0   14.38    0.97
  -9  -7   0    0.31    0.45
   9   7   0    0.50    0.50
 -10  -7   0   -0.32    0.40
  10   7   0   -0.37    0.52
 -11  -7   0    6.21    0.75
  11   7   0    8.91    1.05
 -12  -7   0    0.04    0.48
  12   7   0    0.35    0.62
  10  -8   0   -0.11    0.60
 -10   8   0    0.36    0.56
   9  -8   0    3.90    0.78
  -9   8   0    3.31    0.68
   8  -8   0    7.45    0.94
  -8   8   0    7.33    0.85
   7  -8   0    0.92    0.52
  -7   8   0   -0.04    0.45
   6  -8   0   26.73    1.28
  -6   8   0   25.02    1.18
   5  -8   0    4.76    0.40
   5  -8   0    4.16    0.64
  -5   8   0    4.60    0.62
   4  -8   0    5.96    0.65
   4  -8   0    6.31    0.42
  -4   8   0    5.08    0.60
   3  -8   0   44.27    1.09
   3  -8   0   43.29    1.45
  -3   8   0   45.67    1.43
   2  -8   0    3.54    0.46
   2  -8   0    3.64    0.31
  -2   8   0    3.51    0.47
   1  -8   0   53.48    1.48
   1  -8   0   52.05    1.48
  -1   8   0   54.47    1.27
   0  -8   0  133.71    2.95
   0  -8   0  132.47    2.89
   0   8   0  133.04    2.76
  -1  -8   0   12.95    0.61
  -1  -8   0   11.94    0.68
   1   8   0   11.42    0.62
  -2  -8   0    7.58    0.45
  -2  -8   0    7.16    0.59
   2   8   0    7.47    0.54
  -3  -8   0   66.60    1.54
  -3  -8   0   68.87    1.77
   3   8   0   67.16    1.75
  -4  -8   0   78.93    1.72
  -4  -8   0   77.17    1.96
   4   8   0   78.52    2.03
  -5  -8   0   34.26    1.21
  -5  -8   0   34.19    0.93
   5   8   0   32.85    1.22
  -6  -8   0   28.99    0.88
  -6  -8   0   28.69    1.12
   6   8   0   29.41    1.20
  -7  -8   0    2.44    0.49
  -7  -8   0    3.06    0.36
   7   8   0    2.25    0.55
  -8  -8   0   19.64    1.04
  -8  -8   0   21.11    0.85
   8   8   0   19.07    1.17
  -9  -8   0   19.31    1.06
   9   8   0   19.49    1.16
 -10  -8   0    1.08    0.51
  10   8   0    0.94    0.62
 -11  -8   0    2.21    0.60
  11   8   0    2.02    0.62
 -12  -8   0   37.69    1.58
  12   8   0   33.94    1.69
  10  -9   0    5.80    0.97
 -10   9   0    5.40    0.83
   9  -9   0    2.12    0.71
  -9   9   0    1.43    0.62
   8  -9   0    7.12    0.97
  -8   9   0    6.81    0.84
   7  -9   0    1.11    0.56
  -7   9   0    1.52    0.56
   6  -9   0    1.67    0.54
  -6   9   0    1.44    0.53
   5  -9   0    0.42    0.43
  -5   9   0    0.64    0.47
   4  -9   0   18.60    0.66
   4  -9   0   17.84    1.05
  -4   9   0   19.08    1.00
   3  -9   0    1.14    0.45
   3  -9   0    0.99    0.23
  -3   9   0    0.77    0.43
   2  -9   0    5.72    0.60
   2  -9   0    6.47    0.41
  -2   9   0    6.37    0.62
   1  -9   0    8.57    0.65
   1  -9   0    8.13    0.65
  -1   9   0    8.46    0.47
   0  -9   0    1.21    0.35
   0  -9   0    1.58    0.39
   0   9   0    1.69    0.30
  -1  -9   0   57.72    1.60
  -1  -9   0   57.27    1.46
   1   9   0   53.19    1.43
  -2  -9   0    4.90    0.53
  -2  -9   0    6.14    0.47
   2   9   0    5.99    0.52
  -3  -9   0    0.67    0.37
  -3  -9   0    0.90    0.28
   3   9   0    0.31    0.32
  -4  -9   0    0.64    0.33
  -4  -9   0    1.84    0.28
   4   9   0    1.89    0.43
  -5  -9   0   -0.16    0.21
  -5  -9   0    0.16    0.36
   5   9   0    0.43    0.40
  -6  -9   0   22.08    1.03
  -6  -9   0   21.82    0.75
   6   9   0   22.15    1.08
  -7  -9   0   26.52    0.90
  -7  -9   0   29.16    1.19
   7   9   0   27.01    1.31
  -8  -9   0    0.67    0.45
   8   9   0    0.64    0.46
  -9  -9   0   -0.44    0.40
   9   9   0   -0.08    0.48
 -10  -9   0    5.57    0.71
  10   9   0    7.52    0.92
 -11  -9   0    3.26    0.64
  11   9   0    2.30    0.77
 -12  -9   0    1.24    0.59
  12   9   0    1.18    0.72
   9 -10   0    2.86    0.76
  -9  10   0    2.66    0.69
   8 -10   0    9.61    1.05
  -8  10   0   11.56    1.03
   7 -10   0    2.80    0.73
  -7  10   0    1.82    0.60
   6 -10   0   33.50    1.48
  -6  10   0   32.36    1.41
   5 -10   0    6.80    0.78
  -5  10   0    8.62    0.81
   4 -10   0    3.01    0.57
  -4  10   0    3.48    0.56
   3 -10   0    5.71    0.64
   3 -10   0    6.71    0.44
  -3  10   0    6.99    0.70
   2 -10   0    0.92    0.40
  -2  10   0    0.70    0.25
  -2  10   0    0.87    0.38
   1 -10   0    1.44    0.42
   1 -10   0    1.44    0.41
  -1  10   0    2.15    0.31
   0 -10   0   44.63    1.35
   0 -10   0   42.59    1.43
   0  10   0   45.42    1.21
  -1 -10   0   13.92    0.85
  -1 -10   0   15.40    0.73
   1  10   0   14.74    0.73
  -2 -10   0    3.19    0.48
  -2 -10   0    3.34    0.39
   2  10   0    4.40    0.47
  -3 -10   0    9.84    0.69
  -3 -10   0    9.64    0.56
   3  10   0    8.12    0.64
  -4 -10   0   13.20    0.83
  -4 -10   0   13.43    0.59
   4  10   0   13.61    0.86
  -5 -10   0    7.47    0.48
  -5 -10   0    6.85    0.67
   5  10   0    7.88    0.73
  -6 -10   0   43.22    1.46
  -6 -10   0   43.34    1.15
   6  10   0   41.45    1.53
  -7 -10   0   24.44    1.18
   7  10   0   26.06    1.26
  -8 -10   0    3.88    0.62
   8  10   0    3.97    0.73
  -9 -10   0    2.01    0.56
   9  10   0    2.39    0.64
 -10 -10   0    1.51    0.57
  10  10   0    0.61    0.55
 -11 -10   0    0.84    0.55
  11  10   0    0.21    0.63
 -12 -10   0   19.46    1.28
  12  10   0   17.55    1.48
   9 -11   0    8.73    1.09
  -9  11   0    6.26    0.93
   8 -11   0    2.36    0.78
  -8  11   0    2.05    0.67
   7 -11   0    1.75    0.65
  -7  11   0    0.45    0.57
   6 -11   0    1.19    0.56
  -6  11   0    2.35    0.59
   5 -11   0   -0.08    0.43
  -5  11   0   -0.14    0.39
   4 -11   0   -0.03    0.45
  -4  11   0   -0.01    0.43
   3 -11   0    4.03    0.59
  -3  11   0    4.41    0.65
   2 -11   0    7.15    0.70
  -2  11   0    7.49    0.72
  -2  11   0    7.37    0.50
   1 -11   0    0.12    0.35
   1 -11   0    0.69    0.42
  -1  11   0   -0.15    0.24
   0 -11   0   -0.40    0.35
   0 -11   0    0.53    0.34
   0  11   0    0.30    0.29
  -1 -11   0    1.99    0.39
  -1 -11   0    1.76    0.49
   1  11   0    1.63    0.38
  -2 -11   0    0.10    0.31
  -2 -11   0    0.26    0.35
   2  11   0    0.50    0.35
  -3 -11   0    0.33    0.28
  -3 -11   0   -0.08    0.34
   3  11   0    0.45    0.37
  -4 -11   0   75.31    2.06
  -4 -11   0   74.43    1.76
   4  11   0   73.95    2.06
  -5 -11   0   13.12    0.89
  -5 -11   0   13.98    0.64
   5  11   0   14.54    0.90
  -6 -11   0    1.31    0.48
   6  11   0    1.75    0.51
  -7 -11   0   44.62    1.56
   7  11   0   45.18    1.69
  -8 -11   0    0.75    0.43
   8  11   0   -0.04    0.49
  -9 -11   0    1.20    0.52
   9  11   0   -0.05    0.55
 -10 -11   0    7.45    0.86
  10  11   0    8.01    0.96
 -11 -11   0    1.86    0.60
  11  11   0    0.94    0.63
 -12 -11   0    1.03    0.59
  12  11   0    0.55    0.63
   8 -12   0    2.52    0.80
  -8  12   0    2.63    0.68
   7 -12   0    1.13    0.67
  -7  12   0    0.41    0.56
   6 -12   0    2.81    0.73
  -6  12   0    4.10    0.73
   5 -12   0    3.39    0.68
  -5  12   0    4.86    0.72
   4 -12   0    4.62    0.73
  -4  12   0    6.20    0.78
   3 -12   0    7.20    0.74
  -3  12   0    7.07    0.76
   2 -12   0    3.14    0.59
  -2  12   0    3.41    0.61
   1 -12   0    0.74    0.40
   1 -12   0    1.14    0.48
  -1  12   0    1.39    0.33
   0 -12   0   14.02    0.82
   0 -12   0   13.09    0.94
   0  12   0   13.26    0.70
  -1 -12   0    2.86    0.54
  -1 -12   0    2.61    0.44
   1  12   0    2.24    0.42
  -2 -12   0    0.74    0.41
  -2 -12   0    0.35    0.34
   2  12   0    0.04    0.33
  -3 -12   0   10.38    0.65
  -3 -12   0   11.31    0.87
   3  12   0   11.14    0.80
  -4 -12   0    0.35    0.43
  -4 -12   0    1.14    0.33
   4  12   0    0.89    0.41
  -5 -12   0   20.82    1.11
  -5 -12   0   20.43    0.77
   5  12   0   20.99    1.06
  -6 -12   0   10.86    0.89
   6  12   0    9.65    0.90
  -7 -12   0    5.02    0.69
   7  12   0    3.61    0.66
  -8 -12   0    2.86    0.57
   8  12   0    3.41    0.73
  -9 -12   0    2.59    0.62
   9  12   0    1.94    0.71
 -10 -12   0    6.43    0.81
  10  12   0    4.58    0.86
 -11 -12   0    0.68    0.57
  11  12   0    1.19    0.71
   8 -13   0    1.43    0.72
  -8  13   0    0.97    0.57
   7 -13   0    0.41    0.58
  -7  13   0    1.04    0.58
   6 -13   0    4.72    0.86
  -6  13   0    3.70    0.74
   5 -13   0    0.97    0.62
  -5  13   0    0.87    0.56
   4 -13   0    6.91    0.83
  -4  13   0    6.39    0.78
   3 -13   0    1.25    0.56
  -3  13   0    2.54    0.63
   2 -13   0   12.42    0.95
  -2  13   0   11.59    0.95
   1 -13   0   -0.14    0.38
   1 -13   0    0.18    0.44
   0 -13   0    2.57    0.55
   0 -13   0    1.84    0.45
   0  13   0    1.84    0.39
  -1 -13   0    0.46    0.38
  -1 -13   0   -0.27    0.42
   1  13   0    1.05    0.38
  -2 -13   0    5.08    0.52
  -2 -13   0    4.61    0.63
   2  13   0    4.48    0.56
  -3 -13   0   10.07    0.87
  -3 -13   0   10.24    0.67
   3  13   0   11.33    0.82
  -4 -13   0    4.55    0.64
  -4 -13   0    6.55    0.53
   4  13   0    5.56    0.67
  -5 -13   0   -0.03    0.48
   5  13   0   -0.07    0.46
  -6 -13   0    5.07    0.72
   6  13   0    6.21    0.80
  -7 -13   0   20.07    1.16
   7  13   0   18.98    1.17
  -8 -13   0   -0.58    0.44
   8  13   0    0.27    0.55
  -9 -13   0    8.21    0.89
   9  13   0    7.36    0.93
 -10 -13   0    3.55    0.73
  10  13   0    1.50    0.65
 -11 -13   0    5.35    0.84
  11  13   0    7.54    1.05
   7 -14   0    4.78    0.92
  -7  14   0    5.90    0.86
   6 -14   0    4.42    0.78
  -6  14   0    3.49    0.78
   5 -14   0    6.52    0.93
  -5  14   0    6.05    0.80
   4 -14   0    1.22    0.64
  -4  14   0    1.05    0.56
   3 -14   0    7.26    0.87
  -3  14   0    8.53    0.90
   2 -14   0   11.19    0.96
  -2  14   0   11.33    0.99
   1 -14   0    0.29    0.45
   1 -14   0   -0.16    0.46
   0 -14   0   26.42    1.20
   0 -14   0   28.94    1.36
   0  14   0   28.48    1.07
  -1 -14   0    5.78    0.76
  -1 -14   0    5.26    0.60
   1  14   0    6.94    0.61
  -2 -14   0    1.52    0.41
  -2 -14   0    0.92    0.48
   2  14   0    1.78    0.43
  -3 -14   0    5.45    0.73
  -3 -14   0    6.05    0.57
   3  14   0    4.85    0.63
  -4 -14   0    0.83    0.35
  -4 -14   0    0.82    0.51
   4  14   0    1.30    0.47
  -5 -14   0    9.88    0.91
   5  14   0   11.01    0.92
  -6 -14   0    8.56    0.88
   6  14   0    9.71    0.93
  -7 -14   0    6.82    0.82
   7  14   0    5.77    0.81
  -8 -14   0   -0.18    0.45
   8  14   0    0.18    0.56
  -9 -14   0   -0.17    0.46
   9  14   0    0.34    0.58
 -10 -14   0    3.33    0.74
  10  14   0    2.10    0.73
 -11 -14   0    0.20    0.59
  11  14   0   -0.05    0.57
   6 -15   0    5.27    0.89
  -6  15   0    7.29    0.97
   5 -15   0   -0.06    0.54
  -5  15   0   -0.34    0.43
   4 -15   0    0.10    0.53
  -4  15   0   -0.28    0.50
   3 -15   0   16.18    1.08
  -3  15   0   16.85    1.25
   2 -15   0   -0.44    0.43
  -2  15   0    0.11    0.53
   1 -15   0    1.21    0.53
   1 -15   0    1.09    0.55
   0 -15   0    0.39    0.47
   0 -15   0    0.36    0.48
  -1 -15   0    1.74    0.60
  -1 -15   0    1.34    0.46
   1  15   0    2.00    0.47
  -2 -15   0   13.94    1.09
  -2 -15   0   14.48    0.90
   2  15   0   14.62    0.93
  -3 -15   0    0.31    0.47
  -3 -15   0    0.09    0.35
   3  15   0    0.73    0.44
  -4 -15   0   22.80    1.22
   4  15   0   24.72    1.22
  -5 -15   0    0.98    0.58
   5  15   0    1.01    0.53
  -6 -15   0   11.18    1.02
   6  15   0   10.67    1.01
  -7 -15   0    9.86    1.00
   7  15   0   11.18    1.08
  -8 -15   0    2.36    0.69
   8  15   0    2.30    0.69
  -9 -15   0    6.32    0.88
   9  15   0    6.12    0.96
 -10 -15   0    4.82    0.83
  10  15   0    3.88    0.83
   5 -16   0    1.75    1.06
  -5  16   0    0.87    0.56
   4 -16   0    2.64    0.68
  -4  16   0    3.28    0.73
   3 -16   0    1.49    0.54
  -3  16   0    0.59    0.59
   2 -16   0   13.18    1.11
  -2  16   0   13.90    1.13
   1 -16   0    0.98    0.58
   1 -16   0    0.75    0.47
   0 -16   0    0.34    0.50
   0 -16   0    0.72    0.43
  -1 -16   0    2.89    0.58
  -1 -16   0    4.78    0.76
  -2 -16   0    0.47    0.42
  -2 -16   0    0.38    0.52
   2  16   0    0.49    0.45
  -3 -16   0   17.56    0.93
  -3 -16   0   20.06    1.22
   3  16   0   19.66    1.06
  -4 -16   0    5.37    0.78
   4  16   0    5.58    0.77
  -5 -16   0    3.20    0.69
   5  16   0    2.27    0.64
  -6 -16   0   16.53    1.11
   6  16   0   18.46    1.24
  -7 -16   0    0.76    0.57
   7  16   0    1.39    0.65
  -8 -16   0    4.42    0.81
   8  16   0    3.23    0.80
  -9 -16   0    3.77    0.78
   9  16   0    5.58    1.06
   4 -17   0   -0.17    0.61
  -4  17   0    0.92    0.62
   3 -17   0   17.43    1.19
  -3  17   0   16.43    1.31
   2 -17   0    0.23    0.53
  -2  17   0    0.55    0.58
   1 -17   0    0.26    0.52
  -1  17   0    1.00    0.53
   0 -17   0    0.02    0.45
   0 -17   0    0.78    0.58
  -1 -17   0    4.55    0.65
  -1 -17   0    2.98    0.67
  -2 -17   0    1.29    0.62
  -2 -17   0    1.04    0.49
  -3 -17   0    9.24    0.99
   3  17   0    9.15    0.86
  -4 -17   0   -0.34    0.54
   4  17   0    1.79    0.58
  -5 -17   0    1.57    0.64
   5  17   0    0.55    0.53
  -6 -17   0    1.30    0.60
   6  17   0    0.67    0.57
  -7 -17   0    0.53    0.56
   7  17   0    0.36    0.58
  -8 -17   0    7.01    0.94
   8  17   0    6.95    0.98
  -9 -17   0    1.40    0.62
   9  17   0    1.13    0.64
   3 -18   0    0.40    0.61
  -3  18   0    0.29    0.53
   2 -18   0    1.48    0.63
  -2  18   0    0.42    0.62
   1 -18   0    1.73    0.70
  -1  18   0    1.26    0.57
   0 -18   0   10.55    1.09
   0 -18   0    9.96    0.92
  -1 -18   0    2.06    0.70
  -1 -18   0    2.51    0.58
  -2 -18   0   -0.36    0.46
  -3 -18   0    3.37    0.75
  -4 -18   0   16.26    1.33
   4  18   0   16.94    1.17
  -5 -18   0    0.32    0.54
   5  18   0   -0.20    0.53
  -6 -18   0    3.96    0.78
   6  18   0    5.75    0.86
  -7 -18   0    7.92    0.99
   7  18   0    5.84    0.94
  -8 -18   0    4.63    0.84
   8  18   0    4.32    0.84
   2 -19   0    1.51    0.66
  -2  19   0    1.33    0.67
   1 -19   0    8.21    0.94
  -1  19   0    9.54    1.08
   0 -19   0    3.08    0.81
   0 -19   0    3.88    0.70
  -1 -19   0   20.56    1.43
  -1 -19   0   20.84    1.20
  -2 -19   0    6.46    0.97
  -3 -19   0    7.35    1.00
  -4 -19   0    0.54    0.63
  -5 -19   0    4.68    0.85
   5  19   0    5.61    0.83
  -6 -19   0    1.08    0.67
   6  19   0    1.41    0.69
  -7 -19   0    3.98    0.85
   7  19   0    3.31    0.81
   0 -20   0   11.03    1.21
   0 -20   0    8.30    0.97
  -1 -20   0   13.78    1.33
  -2 -20   0    0.22    0.61
  -3 -20   0   -1.27    0.57
  -4 -20   0    5.09    0.92
  -5 -20   0    0.02    0.63
   5  20   0    0.01    0.59
   5  20  -1    3.39    0.76
  -5 -20   1    2.11    0.79
  -4 -20   1    0.18    0.59
  -3 -20   1   -0.62    0.63
  -2 -20   1    4.99    0.94
  -1 -20   1    3.87    0.90
   0 -20   1    0.72    0.73
   7  19  -1   13.16    1.26
  -7 -19   1   12.44    1.23
   6  19  -1    9.39    1.04
  -6 -19   1   10.44    1.16
   5  19  -1    1.44    0.67
  -5 -19   1    1.87    0.75
   4  19  -1    1.71    0.62
  -4 -19   1    1.93    0.75
  -3 -19   1    8.98    1.08
  -2 -19   1   20.28    1.43
  -1 -19   1    0.48    0.65
   0 -19   1    7.43    0.85
   0 -19   1    8.08    1.05
  -1  19  -1   11.31    1.12
   1 -19   1    9.01    0.96
  -2  19  -1    0.83    0.63
   2 -19   1    0.24    0.57
   8  18  -1    0.72    0.63
  -8 -18   1    0.61    0.55
   7  18  -1    6.56    0.92
  -7 -18   1    6.52    1.00
   6  18  -1    1.41    0.65
  -6 -18   1    2.39    0.73
   5  18  -1   13.31    1.13
  -5 -18   1   12.93    1.21
   4  18  -1    1.86    0.65
  -4 -18   1    2.11    0.70
   3  18  -1    1.44    0.56
  -3 -18   1    1.79    0.71
  -2 -18   1    9.56    1.08
  -1 -18   1   -0.15    0.45
  -1 -18   1    0.70    0.61
   0 -18   1   -0.12    0.59
   0 -18   1   -0.03    0.48
  -1  18  -1    0.38    0.54
   1 -18   1    0.59    0.53
   1 -18   1    1.11    0.62
  -2  18  -1   11.96    1.14
   2 -18   1   14.68    1.21
  -3  18  -1    0.16    0.62
   3 -18   1    0.38    0.59
   9  17  -1    1.42    0.81
  -9 -17   1    1.27    0.60
   8  17  -1    0.98    0.65
  -8 -17   1    0.77    0.59
   7  17  -1    1.11    0.67
  -7 -17   1    1.63    0.67
   6  17  -1    4.28    0.81
  -6 -17   1    4.80    0.82
   5  17  -1    5.02    0.76
  -5 -17   1    4.03    0.75
   4  17  -1   10.13    0.97
  -4 -17   1    9.38    1.01
   3  17  -1    1.05    0.53
  -3 -17   1    0.48    0.59
   2  17  -1    0.83    0.48
  -2 -17   1    0.87    0.62
  -1 -17   1    0.75    0.48
  -1 -17   1    1.19    0.59
   0 -17   1    0.50    0.59
   0 -17   1    0.26    0.46
   1 -17   1   10.27    0.97
   1 -17   1    8.74    1.04
  -2  17  -1    0.38    0.58
   2 -17   1    0.52    0.61
  -3  17  -1    1.24    0.63
   3 -17   1    1.60    0.68
  -4  17  -1   -0.59    0.48
   4 -17   1    0.18    0.59
   9  16  -1    2.45    0.77
  -9 -16   1    1.38    0.66
   8  16  -1    8.63    1.04
  -8 -16   1    9.18    1.02
   7  16  -1    6.24    0.90
  -7 -16   1    4.56    0.76
   6  16  -1   -0.34    0.52
  -6 -16   1   -0.38    0.49
   5  16  -1   11.70    1.02
  -5 -16   1   11.24    1.04
   4  16  -1    4.20    0.68
  -4 -16   1    2.70    0.66
   3  16  -1   -0.41    0.43
  -3 -16   1   -0.05    0.52
   2  16  -1    2.05    0.56
  -2 -16   1    3.12    0.67
  -2 -16   1    3.00    0.53
  -1 -16   1   12.54    1.11
  -1 -16   1   11.99    0.92
   0 -16   1    1.64    0.50
   0 -16   1    0.57    0.63
   1 -16   1   25.99    1.29
   1 -16   1   27.83    1.47
  -2  16  -1   10.93    1.03
   2 -16   1   10.82    0.97
  -3  16  -1    1.02    0.61
   3 -16   1    1.56    0.66
  -4  16  -1   17.59    1.15
   4 -16   1   16.25    1.30
  -5  16  -1    1.63    0.65
   5 -16   1    1.66    0.74
  10  15  -1    0.31    0.58
 -10 -15   1    0.52    0.67
   9  15  -1    0.17    0.67
  -9 -15   1    0.77    0.59
   8  15  -1    6.49    0.95
  -8 -15   1    6.72    0.89
   7  15  -1   10.48    1.07
  -7 -15   1    8.18    0.95
   6  15  -1    0.22    0.57
  -6 -15   1    0.57    0.50
   5  15  -1   15.63    1.12
  -5 -15   1   16.78    1.07
   4  15  -1    0.05    0.46
  -4 -15   1   -0.09    0.49
   3  15  -1   -0.05    0.44
  -3 -15   1    0.02    0.45
  -3 -15   1    0.07    0.34
   2  15  -1    5.38    0.66
  -2 -15   1    5.82    0.78
  -2 -15   1    7.06    0.67
   1  15  -1   -0.29    0.39
  -1 -15   1    0.17    0.39
  -1 -15   1   -0.99    0.43
   0 -15   1    2.07    0.53
   0 -15   1    1.98    0.63
   1 -15   1    0.19    0.53
   1 -15   1    1.08    0.51
  -2  15  -1    1.42    0.56
   2 -15   1    1.35    0.56
  -3  15  -1    2.47    0.66
   3 -15   1    1.68    0.60
  -4  15  -1    0.25    0.54
   4 -15   1    0.21    0.55
  -5  15  -1    7.05    0.90
   5 -15   1    7.21    0.98
  -6  15  -1   -0.28    0.48
   6 -15   1    0.48    0.58
  10  14  -1   -0.02    0.64
 -10 -14   1    0.35    0.56
   9  14  -1    1.86    0.72
  -9 -14   1    1.10    0.59
   8  14  -1   13.48    1.17
  -8 -14   1   15.27    1.18
   7  14  -1   -0.42    0.49
  -7 -14   1    0.50    0.54
   6  14  -1   40.82    1.65
  -6 -14   1   36.74    1.59
   5  14  -1   -0.18    0.43
  -5 -14   1   -0.09    0.46
   4  14  -1    4.63    0.70
  -4 -14   1    5.01    0.70
   3  14  -1    3.09    0.57
  -3 -14   1    3.62    0.48
  -3 -14   1    2.89    0.59
   2  14  -1    0.00    0.38
  -2 -14   1   -0.21    0.32
  -2 -14   1    0.14    0.42
   1  14  -1    9.63    0.74
  -1 -14   1    9.59    0.76
  -1 -14   1    9.65    0.92
   0  14  -1    0.05    0.37
   0 -14   1    0.85    0.53
   0 -14   1    0.52    0.41
   1 -14   1    8.76    0.79
   1 -14   1    8.68    0.89
  -2  14  -1    0.39    0.49
   2 -14   1    1.05    0.50
  -3  14  -1    9.46    0.94
   3 -14   1    9.71    0.98
  -4  14  -1   20.79    1.22
   4 -14   1   23.39    1.32
  -5  14  -1    2.85    0.65
   5 -14   1    2.16    0.67
  -6  14  -1   16.37    1.14
   6 -14   1   13.67    1.27
  -7  14  -1    1.06    0.61
   7 -14   1   -0.01    0.62
  11  13  -1   -0.08    0.58
 -11 -13   1    0.58    0.55
  10  13  -1    3.13    0.77
 -10 -13   1    1.82    0.65
   9  13  -1   18.86    1.33
  -9 -13   1   18.02    1.29
   8  13  -1   11.29    1.08
  -8 -13   1   11.58    1.03
   7  13  -1    4.45    0.77
  -7 -13   1    3.68    0.65
   6  13  -1    1.43    0.53
  -6 -13   1    1.88    0.54
   5  13  -1   43.83    1.60
  -5 -13   1   43.85    1.64
   4  13  -1    3.61    0.61
  -4 -13   1    2.97    0.60
  -4 -13   1    3.20    0.42
   3  13  -1    0.07    0.40
  -3 -13   1   -0.08    0.28
  -3 -13   1    0.50    0.41
   2  13  -1    5.23    0.60
  -2 -13   1    5.26    0.69
  -2 -13   1    4.85    0.50
   1  13  -1    1.04    0.39
  -1 -13   1    1.90    0.44
  -1 -13   1    1.76    0.50
   0  13  -1    3.32    0.48
   0 -13   1    3.74    0.52
   0 -13   1    2.70    0.61
  -1  13  -1   -0.15    0.31
   1 -13   1    0.78    0.46
   1 -13   1    0.15    0.39
  -2  13  -1    3.32    0.60
   2 -13   1    1.89    0.53
  -3  13  -1   14.84    1.11
   3 -13   1   14.01    1.07
  -4  13  -1   10.49    0.96
   4 -13   1   12.84    1.07
  -5  13  -1   -0.45    0.47
   5 -13   1    1.08    0.60
  -6  13  -1    0.46    0.55
   6 -13   1    0.17    0.50
  -7  13  -1    1.23    0.62
   7 -13   1    0.88    0.68
  11  12  -1    0.57    0.62
 -11 -12   1   -0.20    0.51
  10  12  -1   15.97    1.36
 -10 -12   1   17.17    1.19
   9  12  -1   -0.28    0.51
  -9 -12   1    0.36    0.50
   8  12  -1   38.17    1.69
  -8 -12   1   36.11    1.56
   7  12  -1   38.58    1.58
  -7 -12   1   36.41    1.52
   6  12  -1    3.59    0.62
  -6 -12   1    4.40    0.67
   5  12  -1    1.35    0.54
  -5 -12   1    0.04    0.41
   4  12  -1    1.84    0.51
  -4 -12   1    3.63    0.56
  -4 -12   1    2.89    0.37
   3  12  -1    0.81    0.43
  -3 -12   1    0.30    0.40
  -3 -12   1    0.52    0.31
   2  12  -1    0.57    0.39
  -2 -12   1    0.14    0.29
  -2 -12   1    1.09    0.43
   1  12  -1    4.35    0.51
  -1 -12   1    4.69    0.62
  -1 -12   1    5.92    0.55
   0  12  -1    9.82    0.66
   0 -12   1    9.00    0.81
   0 -12   1    8.50    0.69
  -1  12  -1    0.36    0.30
   1 -12   1    0.65    0.46
   1 -12   1    0.19    0.37
  -2  12  -1   13.38    0.69
  -2  12  -1   11.70    0.92
   2 -12   1   11.56    0.90
   2 -12   1   13.02    0.85
  -3  12  -1    3.74    0.63
   3 -12   1    7.03    0.78
  -4  12  -1    9.34    0.87
   4 -12   1   11.36    0.99
  -5  12  -1   22.08    1.19
   5 -12   1   20.14    1.20
  -6  12  -1   -0.07    0.50
   6 -12   1    0.87    0.59
  -7  12  -1    1.62    0.58
   7 -12   1    0.79    0.65
  -8  12  -1    1.25    0.61
   8 -12   1    1.59    0.77
  11  11  -1   11.38    1.16
 -11 -11   1   11.45    1.07
  10  11  -1    2.26    0.72
 -10 -11   1    1.18    0.61
   9  11  -1    7.71    0.90
  -9 -11   1    7.40    0.84
   8  11  -1   62.88    2.11
  -8 -11   1   59.37    1.98
   7  11  -1   34.64    1.46
  -7 -11   1   34.17    1.43
   6  11  -1    1.71    0.52
  -6 -11   1    0.71    0.46
   5  11  -1   29.42    1.24
  -5 -11   1   28.79    1.20
  -5 -11   1   30.25    0.87
   4  11  -1   -0.01    0.37
  -4 -11   1    0.14    0.41
  -4 -11   1   -0.09    0.23
   3  11  -1   40.71    1.35
  -3 -11   1   39.92    1.40
  -3 -11   1   43.19    1.17
   2  11  -1   89.08    2.20
  -2 -11   1   88.14    2.30
  -2 -11   1   87.52    2.07
   1  11  -1    0.76    0.34
  -1 -11   1    1.37    0.44
  -1 -11   1    0.58    0.32
   0  11  -1   10.48    0.66
   0 -11   1   10.28    0.71
   0 -11   1    9.58    0.79
  -1  11  -1   29.83    1.00
   1 -11   1   29.10    1.19
   1 -11   1   30.84    1.18
  -2  11  -1    2.13    0.35
   2 -11   1    1.95    0.50
   2 -11   1    3.09    0.53
  -3  11  -1    0.11    0.42
   3 -11   1   -0.12    0.26
   3 -11   1    0.55    0.47
  -4  11  -1    5.38    0.71
   4 -11   1    5.55    0.70
  -5  11  -1    5.25    0.71
   5 -11   1    4.47    0.73
  -6  11  -1    3.70    0.66
   6 -11   1    3.51    0.74
  -7  11  -1    6.05    0.80
   7 -11   1    4.99    0.88
  -8  11  -1    0.10    0.54
   8 -11   1   -0.79    0.59
  -9  11  -1    8.58    0.98
   9 -11   1    9.28    1.14
  12  10  -1    0.75    0.65
 -12 -10   1   -0.27    0.54
  11  10  -1    2.47    0.79
 -11 -10   1    2.47    0.69
  10  10  -1    3.95    0.76
 -10 -10   1    3.06    0.67
   9  10  -1    3.21    0.70
  -9 -10   1    1.41    0.57
   8  10  -1    0.39    0.48
  -8 -10   1    0.03    0.40
   7  10  -1   -0.50    0.43
  -7 -10   1    0.21    0.43
   6  10  -1   19.85    1.12
  -6 -10   1   20.39    1.06
   5  10  -1   30.59    1.22
  -5 -10   1   28.38    1.20
  -5 -10   1   28.56    0.83
   4  10  -1    1.52    0.46
  -4 -10   1    1.76    0.43
  -4 -10   1    1.65    0.27
   3  10  -1   31.34    1.16
  -3 -10   1   30.01    1.18
  -3 -10   1   30.92    0.91
   2  10  -1    6.25    0.54
  -2 -10   1    7.73    0.52
  -2 -10   1    6.75    0.66
   1  10  -1   34.29    1.12
  -1 -10   1   36.24    1.13
  -1 -10   1   37.71    1.28
   0  10  -1    0.22    0.28
   0 -10   1    0.77    0.33
   0 -10   1    0.84    0.40
  -1  10  -1   19.52    0.75
   1 -10   1   19.18    0.93
   1 -10   1   18.51    0.87
   2 -10   1   37.82    1.06
   2 -10   1   34.91    1.30
   2 -10   1   35.67    1.27
  -3  10  -1   13.59    0.89
   3 -10   1   12.01    0.82
   3 -10   1   12.98    0.61
  -4  10  -1    4.52    0.64
   4 -10   1    3.77    0.61
  -5  10  -1    2.43    0.57
   5 -10   1    2.33    0.60
  -6  10  -1    1.37    0.54
   6 -10   1    1.02    0.60
  -7  10  -1   17.92    1.11
   7 -10   1   17.74    1.21
  -8  10  -1    3.38    0.69
   8 -10   1    1.31    0.70
  -9  10  -1    2.04    0.64
   9 -10   1    0.43    0.70
  12   9  -1    2.89    0.72
 -12  -9   1    3.27    0.70
  11   9  -1   12.98    1.22
 -11  -9   1   14.06    1.15
  10   9  -1   -0.17    0.58
 -10  -9   1    0.53    0.49
   9   9  -1    0.74    0.53
  -9  -9   1    0.81    0.48
   8   9  -1    8.74    0.89
  -8  -9   1   13.73    0.88
   7   9  -1   18.95    1.12
  -7  -9   1   18.10    1.00
   6   9  -1   16.49    1.03
  -6  -9   1   19.11    0.99
  -6  -9   1   18.77    0.64
   5   9  -1    2.97    0.50
  -5  -9   1    3.06    0.28
  -5  -9   1    3.14    0.52
   4   9  -1    5.72    0.61
  -4  -9   1    6.19    0.62
  -4  -9   1    6.48    0.41
   3   9  -1    3.76    0.47
  -3  -9   1    3.79    0.35
  -3  -9   1    3.83    0.52
   2   9  -1   32.45    1.09
  -2  -9   1   31.26    0.93
  -2  -9   1   31.31    1.11
   1   9  -1    0.24    0.29
  -1  -9   1   -0.20    0.29
  -1  -9   1   -0.08    0.27
   0   9  -1    0.26    0.26
   0  -9   1   -0.43    0.26
   0  -9   1    0.39    0.36
  -1   9  -1   35.27    1.02
   1  -9   1   33.73    1.15
   1  -9   1   36.94    1.25
   2  -9   1   18.27    0.68
   2  -9   1   18.68    0.92
   2  -9   1   16.12    0.82
  -3   9  -1   14.05    0.85
   3  -9   1   13.42    0.83
   3  -9   1   13.35    0.60
  -4   9  -1    1.76    0.49
   4  -9   1    1.68    0.33
   4  -9   1    2.09    0.49
  -5   9  -1   19.06    1.03
   5  -9   1   19.18    1.08
  -6   9  -1    8.14    0.81
   6  -9   1    8.85    0.89
  -7   9  -1   -0.45    0.41
   7  -9   1    0.65    0.58
  -8   9  -1    0.33    0.52
   8  -9   1   -0.79    0.51
  -9   9  -1   -0.61    0.45
   9  -9   1    0.59    0.66
 -10   9  -1    3.10    0.69
  10  -9   1    1.67    0.75
 -12  -8   1    2.70    0.68
  11   8  -1    2.16    0.69
 -11  -8   1    1.15    0.55
  10   8  -1   14.48    1.18
 -10  -8   1   16.91    1.03
   9   8  -1   19.70    1.18
  -9  -8   1   19.96    1.07
   8   8  -1    5.70    0.75
  -8  -8   1    7.47    0.74
   7   8  -1    0.12    0.41
  -7  -8   1    0.58    0.23
  -7  -8   1   -0.21    0.38
   6   8  -1    0.26    0.38
  -6  -8   1   -0.04    0.21
  -6  -8   1    0.06    0.35
   5   8  -1    1.28    0.41
  -5  -8   1    1.85    0.40
  -5  -8   1    2.29    0.26
   4   8  -1    5.63    0.56
  -4  -8   1    5.64    0.58
  -4  -8   1    5.19    0.35
   3   8  -1   33.06    1.12
  -3  -8   1   33.53    1.13
  -3  -8   1   35.42    0.89
   2   8  -1    0.73    0.31
  -2  -8   1    0.62    0.25
  -2  -8   1    1.22    0.37
   1   8  -1    3.12    0.38
  -1  -8   1    2.06    0.41
  -1  -8   1    2.74    0.34
   0   8  -1    1.32    0.30
   0  -8   1    2.22    0.35
   0  -8   1    0.85    0.38
   1  -8   1    0.14    0.21
   1  -8   1    0.27    0.30
   1  -8   1   -0.24    0.29
   2  -8   1   86.84    2.15
   2  -8   1   87.91    1.93
   2  -8   1   86.51    2.18
  -3   8  -1    5.26    0.55
   3  -8   1    6.85    0.45
   3  -8   1    6.06    0.62
  -4   8  -1   22.17    1.00
   4  -8   1   20.62    0.74
   4  -8   1   21.31    1.03
  -5   8  -1   45.24    1.50
   5  -8   1   44.38    1.63
   5  -8   1   45.07    1.24
  -6   8  -1    0.56    0.45
   6  -8   1    0.59    0.46
  -7   8  -1   23.75    1.18
   7  -8   1   25.68    1.39
  -8   8  -1   19.92    1.14
   8  -8   1   21.17    1.37
  -9   8  -1    0.79    0.54
   9  -8   1    1.57    0.73
 -10   8  -1    0.17    0.55
  10  -8   1   -0.32    0.57
  12   7  -1    0.01    0.64
 -12  -7   1    0.18    0.52
  11   7  -1   21.14    1.32
 -11  -7   1   18.82    1.11
  10   7  -1    0.15    0.61
 -10  -7   1   -0.15    0.43
   9   7  -1    0.93    0.54
  -9  -7   1    0.84    0.45
   8   7  -1   -0.26    0.43
  -8  -7   1   -0.42    0.37
  -8  -7   1    0.74    0.32
   7   7  -1    5.83    0.70
  -7  -7   1    4.67    0.57
  -7  -7   1    5.74    0.44
   6   7  -1    0.57    0.38
  -6  -7   1    0.61    0.37
  -6  -7   1    0.64    0.23
   5   7  -1   77.23    2.05
  -5  -7   1   77.61    1.67
  -5  -7   1   77.61    1.97
   4   7  -1    9.36    0.69
  -4  -7   1    8.21    0.39
  -4  -7   1    8.52    0.63
   3   7  -1   14.44    0.77
  -3  -7   1   14.23    0.50
  -3  -7   1   14.25    0.72
   2   7  -1    4.07    0.45
  -2  -7   1    4.00    0.45
  -2  -7   1    4.81    0.35
   1   7  -1    1.45    0.32
  -1  -7   1    1.69    0.29
  -1  -7   1    2.06    0.39
   0   7  -1    2.34    0.32
   0  -7   1    3.13    0.38
   0  -7   1    2.36    0.40
   1  -7   1    4.48    0.48
   1  -7   1    3.57    0.34
   1  -7   1    3.95    0.45
   2  -7   1   10.33    0.51
   2  -7   1   11.48    0.67
   2  -7   1   10.17    0.67
  -3   7  -1    3.81    0.49
   3  -7   1    3.62    0.34
   3  -7   1    3.59    0.51
  -4   7  -1    0.86    0.37
   4  -7   1    0.46    0.37
   4  -7   1    0.19    0.24
  -5   7  -1   21.02    1.00
   5  -7   1   21.29    1.06
   5  -7   1   21.61    0.81
  -6   7  -1    0.86    0.45
   6  -7   1    0.03    0.29
   6  -7   1    0.50    0.46
  -7   7  -1   49.99    1.67
   7  -7   1   49.25    1.84
  -8   7  -1    6.35    0.76
   8  -7   1    5.09    0.82
  -9   7  -1   24.02    1.25
   9  -7   1   24.98    1.49
 -10   7  -1   -0.05    0.49
  10  -7   1   -0.19    0.64
  12   6  -1    4.79    0.82
 -12  -6   1    3.37    0.66
  11   6  -1    0.29    0.57
 -11  -6   1    0.01    0.47
  10   6  -1    0.76    0.58
 -10  -6   1    0.58    0.45
   9   6  -1    6.88    0.83
  -9  -6   1    8.47    0.79
   8   6  -1   27.70    1.27
  -8  -6   1   29.61    1.03
  -8  -6   1   27.41    1.17
   7   6  -1   16.29    0.95
  -7  -6   1   17.39    0.72
  -7  -6   1   17.64    0.90
   6   6  -1   13.10    0.82
  -6  -6   1   13.28    0.59
  -6  -6   1   13.31    0.78
   5   6  -1    3.41    0.49
  -5  -6   1    4.38    0.50
  -5  -6   1    4.14    0.31
   4   6  -1    9.42    0.66
  -4  -6   1    8.55    0.60
  -4  -6   1    9.41    0.41
   3   6  -1   24.85    0.90
  -3  -6   1   24.91    0.89
  -3  -6   1   24.72    0.65
   2   6  -1   16.58    0.75
  -2  -6   1   16.92    0.54
  -2  -6   1   15.82    0.76
   1   6  -1   29.33    0.90
  -1  -6   1   28.93    0.94
  -1  -6   1   30.22    0.82
   0   6  -1    0.21    0.23
   0  -6   1    0.69    0.26
   0  -6   1    0.35    0.29
   1  -6   1    3.36    0.32
   1  -6   1    3.10    0.39
   1  -6   1    2.71    0.38
  -2   6  -1    1.80    0.37
   2  -6   1    2.84    0.30
   2  -6   1    2.38    0.40
  -3   6  -1    2.45    0.40
   3  -6   1    2.47    0.42
   3  -6   1    2.41    0.30
  -4   6  -1   93.22    2.24
   4  -6   1   92.43    2.36
   4  -6   1   93.97    2.07
  -5   6  -1    3.96    0.51
   5  -6   1    4.73    0.44
   5  -6   1    4.37    0.57
  -6   6  -1   34.08    1.26
   6  -6   1   32.70    1.08
   6  -6   1   31.75    1.39
  -7   6  -1   10.23    0.81
   7  -6   1    9.24    0.91
   7  -6   1    9.79    0.69
  -8   6  -1   58.89    1.85
   8  -6   1   55.92    2.04
  -9   6  -1    2.09    0.58
   9  -6   1    1.16    0.68
 -10   6  -1    0.84    0.52
  10  -6   1    0.41    0.63
  11  -6   1    2.41    0.81
  12   5  -1    1.04    0.64
 -12  -5   1    0.05    0.51
  11   5  -1    1.65    0.59
 -11  -5   1    0.63    0.52
  10   5  -1    0.92    0.51
 -10  -5   1    0.20    0.48
   9   5  -1    0.16    0.44
  -9  -5   1   -0.18    0.36
  -9  -5   1   -0.22    0.39
   8   5  -1   36.23    1.44
  -8  -5   1   33.01    1.13
  -8  -5   1   32.20    1.24
   7   5  -1   28.40    1.20
  -7  -5   1   30.20    0.99
  -7  -5   1   31.01    1.14
   6   5  -1    6.79    0.63
  -6  -5   1    7.81    0.51
  -6  -5   1    7.10    0.60
   5   5  -1   71.51    1.89
  -5  -5   1   70.76    1.78
  -5  -5   1   70.67    1.58
   4   5  -1   11.51    0.72
  -4  -5   1   10.25    0.44
  -4  -5   1   11.09    0.65
   3   5  -1   18.62    0.77
  -3  -5   1   17.67    0.52
  -3  -5   1   18.86    0.79
   2   5  -1    0.19    0.30
  -2  -5   1    0.34    0.17
  -2  -5   1    0.47    0.28
   1   5  -1    0.23    0.27
  -1  -5   1    0.13    0.29
  -1  -5   1    0.31    0.22
   0   5  -1    1.04    0.27
   0  -5   1    0.57    0.27
   0  -5   1    0.83    0.27
   1  -5   1    3.38    0.30
   1  -5   1    2.64    0.35
   1  -5   1    2.65    0.35
  -2   5  -1   58.66    1.49
   2  -5   1   60.62    1.36
   2  -5   1   60.76    1.54
  -3   5  -1   21.24    0.82
   3  -5   1   19.85    0.85
   3  -5   1   21.52    0.70
  -4   5  -1    0.13    0.31
   4  -5   1    0.28    0.36
   4  -5   1   -0.10    0.23
  -5   5  -1   -0.44    0.28
   5  -5   1    0.00    0.38
   5  -5   1    0.31    0.27
  -6   5  -1    0.45    0.36
   6  -5   1    0.36    0.30
   6  -5   1    0.17    0.40
  -7   5  -1   51.18    1.65
   7  -5   1   55.30    1.56
   7  -5   1   55.20    1.85
  -8   5  -1   -0.34    0.41
   8  -5   1   -0.68    0.31
   8  -5   1    0.17    0.49
  -9   5  -1    3.77    0.65
   9  -5   1    1.76    0.60
 -10   5  -1    1.90    0.60
  10  -5   1    2.33    0.76
  11  -5   1    2.92    0.80
  12   4  -1    0.30    0.62
 -12  -4   1    1.12    0.56
  11   4  -1    0.76    0.58
 -11  -4   1    0.70    0.52
  10   4  -1    0.44    0.52
 -10  -4   1    0.07    0.45
 -10  -4   1    0.40    0.42
   9   4  -1   -0.19    0.41
  -9  -4   1    0.95    0.39
  -9  -4   1    0.61    0.45
   8   4  -1    4.37    0.62
  -8  -4   1    2.97    0.45
  -8  -4   1    3.46    0.55
   7   4  -1   -0.26    0.33
  -7  -4   1   -0.07    0.28
  -7  -4   1   -0.28    0.32
   6   4  -1   58.53    1.70
  -6  -4   1   56.34    1.57
  -6  -4   1   57.22    1.43
   5   4  -1   34.15    1.13
  -5  -4   1   32.16    0.89
  -5  -4   1   32.41    1.07
   4   4  -1   37.33    1.16
  -4  -4   1   37.38    1.09
  -4  -4   1   39.28    0.94
   3   4  -1    1.99    0.35
  -3  -4   1    2.90    0.22
  -3  -4   1    3.57    0.40
   2   4  -1  144.49    2.98
  -2  -4   1  142.54    2.75
  -2  -4   1  146.01    2.94
   1   4  -1   64.78    1.48
  -1  -4   1   67.98    1.38
  -1  -4   1   66.22    1.50
   0  -4   1    0.24    0.22
   0  -4   1    0.04    0.23
   0  -4   1    0.30    0.24
   1  -4   1    2.03    0.26
   1  -4   1    1.81    0.31
   1  -4   1    1.33    0.29
  -2   4  -1    1.64    0.32
   2  -4   1    1.20    0.25
   2  -4   1    0.70    0.30
  -3   4  -1    1.39    0.31
   3  -4   1    1.42    0.27
   3  -4   1    1.40    0.34
  -4   4  -1   23.38    0.87
   4  -4   1   23.49    0.95
   4  -4   1   23.71    0.77
  -5   4  -1   66.44    1.73
   5  -4   1   69.26    1.67
   5  -4   1   66.58    1.87
  -6   4  -1    5.19    0.54
   6  -4   1    3.79    0.45
   6  -4   1    3.42    0.55
  -7   4  -1    0.77    0.40
   7  -4   1    0.18    0.40
   7  -4   1    0.14    0.31
  -8   4  -1    9.50    0.80
   8  -4   1    8.62    0.87
   8  -4   1    8.81    0.72
  -9   4  -1    7.55    0.78
   9  -4   1    7.36    0.74
   9  -4   1    8.72    0.95
 -10   4  -1    8.47    0.88
  10  -4   1    7.98    0.98
  11  -4   1    5.70    0.90
  12   3  -1    0.60    0.59
 -12  -3   1    0.14    0.52
  11   3  -1   10.04    1.00
 -11  -3   1   10.85    0.89
 -11  -3   1   10.09    0.95
  10   3  -1    0.77    0.54
 -10  -3   1    1.03    0.48
 -10  -3   1    1.83    0.51
   9   3  -1    5.22    0.67
   9   3  -1    5.03    0.61
  -9  -3   1    5.66    0.67
   8   3  -1   64.77    1.78
   8   3  -1   66.10    1.96
  -8  -3   1   64.97    1.86
   7   3  -1    1.92    0.45
   7   3  -1    2.42    0.40
  -7  -3   1    2.61    0.46
   6   3  -1   23.15    0.82
   6   3  -1   21.14    0.94
  -6  -3   1   24.79    0.94
   5   3  -1   94.86    2.07
   5   3  -1   94.26    2.27
  -5  -3   1   96.15    2.19
   4   3  -1   16.94    0.75
  -4  -3   1   17.36    0.73
  -4  -3   1   17.85    0.60
   3   3  -1   20.47    0.77
  -3  -3   1   22.76    0.60
  -3  -3   1   20.91    0.73
   2   3  -1  282.79    5.50
  -2  -3   1  286.54    5.41
   1   3  -1  110.15    2.24
   0  -3   1    1.62    0.23
   0  -3   1    1.60    0.25
   0  -3   1    1.28    0.21
   1  -3   1  101.58    2.08
   1  -3   1  104.36    2.15
   1  -3   1  100.27    2.04
  -2   3  -1   39.00    1.02
   2  -3   1   40.19    0.98
   2  -3   1   40.03    1.09
  -3   3  -1    8.45    0.52
   3  -3   1    8.39    0.46
   3  -3   1    8.00    0.54
  -4   3  -1    0.49    0.28
   4  -3   1   -0.06    0.29
   4  -3   1    0.65    0.26
  -5   3  -1   15.23    0.72
   5  -3   1   14.98    0.84
   5  -3   1   15.07    0.71
  -6   3  -1    6.45    0.57
   6  -3   1    6.47    0.54
   6  -3   1    6.61    0.67
  -7   3  -1    0.07    0.37
   7  -3   1    0.27    0.34
   7  -3   1    0.00    0.40
  -8   3  -1    0.61    0.44
   8  -3   1    0.90    0.39
   8  -3   1    1.20    0.54
  -9   3  -1   11.09    0.88
   9  -3   1    9.72    0.80
   9  -3   1    9.19    0.91
 -10   3  -1    9.92    0.93
  10  -3   1   10.26    1.05
  10  -3   1    9.71    0.88
  11  -3   1    3.30    0.75
  12   2  -1    2.86    0.71
 -12  -2   1    1.65    0.61
  11   2  -1    0.28    0.51
  11   2  -1    0.52    0.50
 -11  -2   1   -0.08    0.47
  10   2  -1    3.01    0.64
  10   2  -1    2.73    0.58
 -10  -2   1    3.30    0.62
   9   2  -1    0.65    0.51
   9   2  -1    0.71    0.62
  -9  -2   1    0.75    0.47
   8   2  -1    1.80    0.45
   8   2  -1    1.99    0.52
  -8  -2   1    2.15    0.49
   7   2  -1   40.95    1.28
   7   2  -1   43.48    1.40
  -7  -2   1   42.54    1.35
   6   2  -1    2.29    0.42
   6   2  -1    1.70    0.35
  -6  -2   1    2.20    0.40
   5   2  -1   45.15    1.22
   5   2  -1   48.47    1.35
  -5  -2   1   45.89    1.27
   4   2  -1    3.23    0.39
   4   2  -1    3.29    0.32
  -4  -2   1    2.89    0.38
   3   2  -1   23.13    0.79
   3   2  -1   22.40    0.63
  -3  -2   1   22.32    0.74
  -2  -2   1   60.12    1.34
   1   2  -1  282.89    5.30
  -1  -2   1  277.09    5.22
   0  -2   1   -0.25    0.14
   0  -2   1   -0.26    0.12
   0  -2   1   -0.09    0.15
   1  -2   1    2.01    0.21
   1  -2   1    2.26    0.25
   1  -2   1    1.62    0.22
  -2   2  -1    6.26    0.43
   2  -2   1    6.60    0.41
   2  -2   1    7.06    0.46
  -3   2  -1    1.64    0.29
   3  -2   1    1.03    0.31
   3  -2   1    1.29    0.28
  -4   2  -1    0.91    0.28
   4  -2   1    0.37    0.27
   4  -2   1    0.25    0.29
  -5   2  -1   12.33    0.68
   5  -2   1   12.60    0.72
   5  -2   1   11.36    0.63
  -6   2  -1   45.25    1.32
   6  -2   1   45.53    1.49
   6  -2   1   44.36    1.32
  -7   2  -1   23.97    0.97
   7  -2   1   25.11    1.03
   7  -2   1   23.07    1.10
  -8   2  -1    3.92    0.55
   8  -2   1    4.30    0.64
   8  -2   1    3.50    0.55
  -9   2  -1   17.44    0.97
   9  -2   1   18.61    1.00
   9  -2   1   16.32    1.05
 -10   2  -1   18.15    1.04
  10  -2   1   16.29    1.16
  10  -2   1   19.75    1.17
  11  -2   1   28.31    1.49
  11  -2   1   25.02    1.30
  12  -2   1    0.50    0.70
  12   1  -1    2.94    0.74
  12   1  -1    2.91    0.70
 -12  -1   1    2.82    0.69
  11   1  -1    2.71    0.66
  11   1  -1    5.11    0.75
 -11  -1   1    4.56    0.73
  10   1  -1    0.66    0.53
  10   1  -1    0.73    0.51
 -10  -1   1    0.81    0.53
   9   1  -1    0.79    0.46
   9   1  -1    0.20    0.46
  -9  -1   1    1.05    0.47
   8   1  -1   12.55    0.82
   8   1  -1   13.50    0.89
  -8  -1   1   12.62    0.83
   7   1  -1   15.71    0.81
   7   1  -1   16.49    0.87
  -7  -1   1   14.76    0.82
   6   1  -1   22.65    0.88
   6   1  -1   23.31    0.95
  -6  -1   1   24.14    0.93
   5   1  -1   13.92    0.69
   5   1  -1   13.49    0.64
  -5  -1   1   13.56    0.70
   4   1  -1    7.16    0.48
   4   1  -1    7.14    0.51
  -4  -1   1    6.74    0.47
   3   1  -1    0.87    0.28
   3   1  -1    0.94    0.25
  -3  -1   1    1.04    0.29
   2   1  -1   15.48    0.46
   2   1  -1   15.30    0.54
  -2  -1   1   15.79    0.56
   1   1  -1   41.06    0.89
  -1  -1   1   39.17    0.87
  -1   1  -1  392.26    7.29
   1  -1   1  392.22    7.43
   1  -1   1  413.55    7.49
  -2   1  -1    0.06    0.18
   2  -1   1   -0.09    0.21
   2  -1   1   -0.17    0.22
   3  -1   1    0.43    0.26
   3  -1   1    0.80    0.34
  -4   1  -1   22.15    0.77
   4  -1   1   22.99    0.82
   4  -1   1   23.19    0.88
  -5   1  -1  193.40    3.94
   5  -1   1  194.78    4.13
   5  -1   1  199.31    4.05
  -6   1  -1    0.61    0.33
   6  -1   1    0.48    0.33
   6  -1   1    0.37    0.34
  -7   1  -1    5.72    0.57
   7  -1   1    7.71    0.72
   7  -1   1    5.75    0.56
  -8   1  -1   13.77    0.81
   8  -1   1   12.41    0.85
   8  -1   1   14.69    0.93
  -9   1  -1   -0.01    0.40
   9  -1   1    0.00    0.47
   9  -1   1   -0.20    0.40
 -10   1  -1    2.70    0.60
  10  -1   1    3.45    0.64
  10  -1   1    3.14    0.68
  11  -1   1   -0.06    0.58
  11  -1   1    1.12    0.54
  12  -1   1    0.69    0.56
  12  -1   1    0.05    0.61
  12   0  -1    0.26    0.60
  12   0  -1    0.38    0.57
 -12   0   1    0.35    0.58
  11   0  -1    0.67    0.58
  11   0  -1    0.48    0.48
 -11   0   1    0.00    0.50
  10   0  -1    0.20    0.48
  10   0  -1    0.08    0.45
 -10   0   1    0.45    0.50
   9   0  -1    1.26    0.48
   9   0  -1    1.12    0.48
  -9   0   1    0.79    0.46
   8   0  -1   13.01    0.87
   8   0  -1   12.33    0.85
  -8   0   1   14.30    0.88
   7   0  -1    0.44    0.34
   7   0  -1    1.19    0.40
  -7   0   1    1.11    0.41
   6   0  -1   25.30    0.95
   6   0  -1   23.98    0.94
  -6   0   1   22.62    0.94
   5   0  -1   75.49    1.81
   5   0  -1   73.05    1.80
  -5   0   1   72.44    1.78
   4   0  -1    8.78    0.55
   4   0  -1    7.58    0.50
  -4   0   1    9.58    0.58
   3   0  -1   40.86    1.05
   3   0  -1   42.10    1.07
  -3   0   1   41.29    1.06
   2   0  -1   74.96    1.59
   2   0  -1   76.79    1.59
  -2   0   1   77.49    1.61
   1   0  -1  392.57    7.22
  -1   0   1  386.58    7.14
   1   0   1   76.92    1.54
   1   0   1   78.07    1.55
  -2   0  -1  152.38    2.90
   2   0   1  152.45    3.03
   2   0   1  154.16    3.01
  -3   0  -1    8.17    0.44
   3   0   1    7.92    0.48
   3   0   1    7.72    0.55
  -4   0  -1   -0.01    0.25
   4   0   1   -0.08    0.29
   4   0   1   -0.14    0.28
  -5   0  -1   74.08    1.75
   5   0   1   77.32    1.85
   5   0   1   73.08    1.86
  -6   0  -1   32.63    1.06
   6   0   1   32.24    1.15
   6   0   1   33.71    1.14
  -7   0  -1   11.52    0.68
   7   0   1   10.90    0.72
   7   0   1   11.14    0.78
  -8   0  -1   46.68    1.44
   8   0   1   46.49    1.56
   8   0   1   45.75    1.54
  -9   0  -1    0.25    0.42
   9   0   1    0.64    0.47
   9   0   1   -0.18    0.42
 -10   0  -1    3.37    0.64
  10   0   1    2.62    0.63
  10   0   1    3.88    0.69
  11   0   1    5.74    0.81
  11   0   1    3.86    0.72
  12   0   1    5.16    0.84
  12   0   1    5.06    0.77
  12  -1  -1    1.12    0.67
 -12   1   1    0.30    0.55
  11  -1  -1   22.15    1.29
  11  -1  -1   23.14    1.29
 -11   1   1   22.71    1.25
  10  -1  -1    2.73    0.66
  10  -1  -1    3.59    0.60
 -10   1   1    4.29    0.70
   9  -1  -1   13.09    0.91
   9  -1  -1   12.67    0.89
  -9   1   1   11.69    0.94
   8  -1  -1   40.61    1.44
   8  -1  -1   46.60    1.56
  -8   1   1   44.49    1.50
   7  -1  -1   28.74    1.16
   7  -1  -1   28.72    1.08
  -7   1   1   30.27    1.15
   6  -1  -1   15.11    0.80
   6  -1  -1   14.38    0.73
  -6   1   1   14.37    0.78
   5  -1  -1   46.00    1.32
   5  -1  -1   43.57    1.23
  -5   1   1   43.92    1.27
   4  -1  -1   -0.23    0.26
   4  -1  -1   -0.02    0.29
  -4   1   1   -0.06    0.27
   3  -1  -1    0.18    0.27
   3  -1  -1    0.11    0.23
  -3   1   1    0.05    0.26
   2  -1  -1    6.51    0.46
   2  -1  -1    5.63    0.31
  -2   1   1    6.35    0.44
   1  -1  -1    2.48    0.22
  -1   1   1    1.75    0.19
  -1  -1  -1  352.26    7.43
   1   1   1  445.87    7.44
  -2  -1  -1   64.86    1.30
   2   1   1   64.29    1.38
   2   1   1   62.75    1.40
  -3  -1  -1    4.41    0.32
   3   1   1    4.34    0.38
   3   1   1    4.82    0.38
  -4  -1  -1    0.99    0.27
   4   1   1    1.46    0.34
   4   1   1    1.34    0.32
  -5  -1  -1   49.58    1.28
   5   1   1   51.05    1.39
   5   1   1   51.18    1.39
  -6  -1  -1   16.80    0.74
   6   1   1   16.78    0.84
   6   1   1   15.54    0.79
  -7  -1  -1    9.94    0.66
   7   1   1   10.47    0.75
   7   1   1    9.65    0.72
  -8  -1  -1    1.19    0.45
   8   1   1    1.47    0.48
   8   1   1    0.67    0.45
  -9  -1  -1    9.34    0.75
   9   1   1    8.81    0.84
   9   1   1    8.20    0.79
 -10  -1  -1    0.37    0.46
  10   1   1    1.43    0.56
  10   1   1    0.38    0.48
 -11  -1  -1    0.14    0.47
  11   1   1    0.18    0.49
  11   1   1    0.15    0.54
 -12  -1  -1    0.37    0.58
  12   1   1    0.62    0.57
  12  -2  -1    5.83    0.90
  11  -2  -1    0.98    0.55
  11  -2  -1    1.17    0.65
 -11   2   1    1.15    0.61
  10  -2  -1   22.19    1.26
  10  -2  -1   21.28    1.10
 -10   2   1   19.46    1.15
   9  -2  -1    8.62    0.75
   9  -2  -1    8.16    0.84
  -9   2   1    8.10    0.82
   8  -2  -1   17.58    0.91
   8  -2  -1   17.56    1.05
  -8   2   1   17.26    0.99
   7  -2  -1    0.59    0.36
   7  -2  -1    1.05    0.44
  -7   2   1    0.15    0.37
   6  -2  -1    1.01    0.41
   6  -2  -1    0.19    0.26
  -6   2   1    0.21    0.32
   5  -2  -1   25.92    0.90
   5  -2  -1   25.59    0.96
  -5   2   1   25.30    0.95
   4  -2  -1  107.92    2.24
   4  -2  -1  104.90    2.38
  -4   2   1  103.18    2.33
   3  -2  -1   27.25    0.76
   3  -2  -1   28.60    0.88
  -3   2   1   28.25    0.89
   2  -2  -1  341.59    6.39
   2  -2  -1  346.07    6.56
  -2   2   1  339.22    6.43
   1  -2  -1  241.18    4.58
  -1   2   1  235.97    4.49
   0  -2  -1   -0.34    0.16
   0  -2  -1   -0.68    0.15
  -1  -2  -1   69.16    1.38
  -1  -2  -1   69.42    1.41
   1   2   1   69.97    1.43
  -2  -2  -1    5.39    0.35
  -2  -2  -1    5.46    0.32
   2   2   1    4.84    0.35
  -3  -2  -1    7.36    0.47
  -3  -2  -1    6.37    0.38
   3   2   1    6.17    0.44
  -4  -2  -1    0.09    0.25
   4   2   1    0.24    0.26
   4   2   1    0.02    0.28
  -5  -2  -1    8.12    0.55
   5   2   1    9.61    0.62
   5   2   1    9.35    0.59
  -6  -2  -1    3.37    0.40
   6   2   1    1.82    0.42
   6   2   1    2.79    0.41
  -7  -2  -1    0.08    0.31
   7   2   1   -0.22    0.35
   7   2   1    0.02    0.33
  -8  -2  -1   73.92    1.95
   8   2   1   74.67    2.06
   8   2   1   74.25    2.12
  -9  -2  -1   -0.04    0.36
   9   2   1    0.23    0.44
   9   2   1   -0.26    0.43
 -10  -2  -1    0.43    0.49
 -10  -2  -1    0.66    0.46
  10   2   1    0.70    0.56
 -11  -2  -1    1.74    0.53
 -11  -2  -1    3.05    0.66
  11   2   1    2.49    0.65
 -12  -2  -1    4.58    0.76
  12   2   1    4.23    0.78
  12  -3  -1    0.52    0.68
  11  -3  -1   10.91    1.09
 -11   3   1    9.69    0.99
  10  -3  -1    0.59    0.46
  10  -3  -1   -0.08    0.52
 -10   3   1    0.11    0.51
   9  -3  -1   20.14    1.00
   9  -3  -1   22.19    1.23
  -9   3   1   21.53    1.14
   8  -3  -1    1.40    0.42
   8  -3  -1    2.03    0.55
  -8   3   1    2.34    0.54
   7  -3  -1    0.17    0.30
   7  -3  -1    0.36    0.41
  -7   3   1   -0.09    0.38
   6  -3  -1    2.86    0.40
   6  -3  -1    3.83    0.54
  -6   3   1    3.26    0.50
   5  -3  -1   22.65    0.80
   5  -3  -1   22.73    0.93
  -5   3   1   22.47    0.93
   4  -3  -1   10.32    0.64
   4  -3  -1   10.98    0.51
  -4   3   1   10.09    0.64
   3  -3  -1   11.55    0.63
   3  -3  -1   12.55    0.47
  -3   3   1   12.15    0.60
   2  -3  -1    3.92    0.39
   2  -3  -1    4.54    0.29
  -2   3   1    5.02    0.42
   1  -3  -1    2.96    0.34
  -1   3   1    2.51    0.29
   0  -3  -1    1.90    0.25
   0  -3  -1    2.69    0.27
  -1  -3  -1  289.66    5.41
  -1  -3  -1  287.87    5.47
   1   3   1  291.39    5.47
  -2  -3  -1  183.12    3.52
  -2  -3  -1  183.81    3.56
   2   3   1  184.30    3.64
  -3  -3  -1    6.17    0.43
  -3  -3  -1    6.28    0.40
   3   3   1    5.99    0.46
  -4  -3  -1    3.28    0.35
  -4  -3  -1    3.41    0.36
   4   3   1    2.89    0.40
  -5  -3  -1    0.71    0.28
  -5  -3  -1    0.53    0.28
   5   3   1    0.47    0.33
  -6  -3  -1   26.95    0.97
  -6  -3  -1   25.95    0.89
   6   3   1   23.64    0.99
  -7  -3  -1   23.67    0.94
  -7  -3  -1   21.76    0.88
   7   3   1   22.28    1.06
  -8  -3  -1    4.64    0.55
  -8  -3  -1    7.20    0.64
   8   3   1    5.70    0.68
  -9  -3  -1   12.44    0.88
  -9  -3  -1   13.70    0.86
   9   3   1   11.86    0.94
 -10  -3  -1    2.15    0.53
 -10  -3  -1    2.31    0.50
  10   3   1    2.60    0.63
 -11  -3  -1    4.55    0.73
 -11  -3  -1    3.74    0.64
  11   3   1    3.87    0.79
 -12  -3  -1    1.67    0.63
  12   3   1    1.26    0.71
  11  -4  -1    1.06    0.60
 -11   4   1    1.57    0.65
  10  -4  -1    0.72    0.59
 -10   4   1   -0.69    0.51
   9  -4  -1    0.14    0.48
   9  -4  -1    0.20    0.44
  -9   4   1   -0.72    0.43
   8  -4  -1   14.12    0.83
   8  -4  -1   13.79    0.97
  -8   4   1   15.67    0.97
   7  -4  -1    9.23    0.64
   7  -4  -1    9.20    0.84
  -7   4   1    8.94    0.78
   6  -4  -1    5.80    0.52
   6  -4  -1    4.40    0.57
  -6   4   1    5.12    0.59
   5  -4  -1    1.95    0.42
   5  -4  -1    2.53    0.33
  -5   4   1    2.44    0.42
   4  -4  -1   14.64    0.80
   4  -4  -1   14.78    0.57
  -4   4   1   13.52    0.74
   3  -4  -1   14.33    0.51
   3  -4  -1   14.65    0.76
  -3   4   1   15.01    0.72
   2  -4  -1   35.23    0.78
   2  -4  -1   34.62    1.04
  -2   4   1   34.70    1.00
   1  -4  -1  290.09    5.59
  -1   4   1  284.55    5.49
   0  -4  -1   35.42    0.94
   0  -4  -1   35.77    0.94
   0   4   1   37.80    0.82
  -1  -4  -1   41.25    1.03
  -1  -4  -1   41.14    0.99
   1   4   1   40.39    0.98
  -2  -4  -1   36.61    0.97
  -2  -4  -1   36.72    0.90
   2   4   1   36.88    1.01
  -3  -4  -1    5.15    0.35
  -3  -4  -1    4.88    0.40
   3   4   1    4.42    0.42
  -4  -4  -1    4.22    0.39
  -4  -4  -1    4.05    0.38
   4   4   1    4.16    0.45
  -5  -4  -1   52.87    1.34
  -5  -4  -1   53.07    1.36
   5   4   1   52.65    1.53
  -6  -4  -1   23.39    0.88
  -6  -4  -1   23.19    0.86
   6   4   1   22.24    0.97
  -7  -4  -1   11.60    0.74
  -7  -4  -1   10.60    0.71
   7   4   1   11.70    0.85
  -8  -4  -1   75.98    2.04
  -8  -4  -1   78.16    2.03
   8   4   1   81.51    2.27
  -9  -4  -1    6.74    0.69
  -9  -4  -1    6.78    0.69
   9   4   1    6.56    0.75
 -10  -4  -1    0.50    0.43
 -10  -4  -1    0.51    0.48
  10   4   1    0.30    0.50
 -11  -4  -1   10.43    0.90
 -11  -4  -1   10.45    0.91
  11   4   1   10.07    1.05
  12   4   1    0.63    0.62
  11  -5  -1    2.62    0.76
 -11   5   1    2.71    0.72
  10  -5  -1    0.50    0.58
 -10   5   1   -0.76    0.46
   9  -5  -1    1.49    0.62
  -9   5   1    1.01    0.54
   8  -5  -1   12.40    1.03
   8  -5  -1   13.52    0.83
  -8   5   1   13.86    0.95
   7  -5  -1    3.32    0.60
   7  -5  -1    5.74    0.52
  -7   5   1    5.00    0.66
   6  -5  -1    2.12    0.36
   6  -5  -1    2.50    0.50
  -6   5   1    2.63    0.50
   5  -5  -1   80.35    2.15
   5  -5  -1   80.26    1.81
  -5   5   1   79.02    2.05
   4  -5  -1   20.64    0.90
   4  -5  -1   19.96    0.65
  -4   5   1   21.04    0.89
   3  -5  -1    0.15    0.34
   3  -5  -1    0.43    0.19
  -3   5   1    0.03    0.29
   2  -5  -1   27.71    0.65
   2  -5  -1   27.36    0.94
  -2   5   1   28.20    0.95
   1  -5  -1   36.51    1.07
  -1   5   1   35.77    0.80
  -1   5   1   36.75    1.07
   0  -5  -1   10.13    0.52
   0  -5  -1    8.61    0.54
   0   5   1    9.69    0.42
  -1  -5  -1  536.28    9.89
  -1  -5  -1  534.29   10.01
   1   5   1  524.53    9.96
  -2  -5  -1   26.09    0.85
  -2  -5  -1   27.78    0.76
   2   5   1   26.22    0.87
  -3  -5  -1   20.35    0.75
  -3  -5  -1   20.87    0.66
   3   5   1   18.82    0.81
  -4  -5  -1   47.35    1.25
  -4  -5  -1   47.07    1.18
   4   5   1   46.63    1.34
  -5  -5  -1    1.21    0.32
  -5  -5  -1    1.19    0.27
   5   5   1    0.88    0.37
  -6  -5  -1    9.00    0.60
  -6  -5  -1    9.92    0.62
   6   5   1    9.17    0.74
  -7  -5  -1   12.62    0.72
  -7  -5  -1   13.06    0.74
   7   5   1   11.80    0.81
  -8  -5  -1   13.91    0.80
  -8  -5  -1   13.87    0.78
   8   5   1   13.85    0.92
  -9  -5  -1    2.02    0.50
  -9  -5  -1    2.21    0.62
   9   5   1    2.07    0.60
 -10  -5  -1    2.28    0.53
 -10  -5  -1    3.33    0.57
  10   5   1    2.48    0.65
 -11  -5  -1    1.92    0.54
 -11  -5  -1    1.77    0.56
  11   5   1    1.23    0.61
  12   5   1    1.11    0.71
  11  -6  -1    0.98    0.74
 -11   6   1    1.26    0.61
  10  -6  -1    6.77    0.94
 -10   6   1    6.83    0.87
   9  -6  -1    6.04    0.88
  -9   6   1    7.47    0.83
   8  -6  -1   -0.60    0.43
  -8   6   1    0.46    0.48
   7  -6  -1   25.76    0.96
   7  -6  -1   26.01    1.24
  -7   6   1   26.81    1.21
   6  -6  -1   39.86    1.49
   6  -6  -1   41.70    1.16
  -6   6   1   41.29    1.45
   5  -6  -1    4.43    0.37
   5  -6  -1    3.82    0.56
  -5   6   1    3.80    0.53
   4  -6  -1   11.90    0.75
   4  -6  -1   11.74    0.49
  -4   6   1   11.83    0.76
   3  -6  -1   -0.23    0.32
   3  -6  -1    0.14    0.16
  -3   6   1    0.10    0.33
   2  -6  -1   30.63    0.72
   2  -6  -1   31.74    1.04
  -2   6   1   29.41    1.04
   1  -6  -1  105.11    2.38
   1  -6  -1  104.27    2.33
  -1   6   1  108.20    2.10
   0  -6  -1   12.81    0.63
   0  -6  -1   12.18    0.59
   0   6   1   12.66    0.50
  -1  -6  -1   -0.41    0.25
  -1  -6  -1    0.44    0.29
   1   6   1   -0.08    0.24
  -2  -6  -1   51.24    1.22
  -2  -6  -1   49.41    1.28
   2   6   1   49.36    1.29
  -3  -6  -1    3.96    0.40
  -3  -6  -1    3.43    0.33
   3   6   1    3.76    0.44
  -4  -6  -1   17.32    0.75
  -4  -6  -1   17.43    0.64
   4   6   1   18.37    0.81
  -5  -6  -1   43.70    1.16
  -5  -6  -1   43.02    1.26
   5   6   1   44.99    1.41
  -6  -6  -1    8.31    0.62
  -6  -6  -1    9.05    0.57
   6   6   1    8.34    0.70
  -7  -6  -1   13.63    0.72
  -7  -6  -1   13.48    0.75
   7   6   1   12.91    0.85
  -8  -6  -1   -0.34    0.33
  -8  -6  -1   -0.13    0.35
   8   6   1    0.49    0.43
  -9  -6  -1    6.86    0.69
  -9  -6  -1    6.85    0.67
   9   6   1    6.04    0.77
 -10  -6  -1    7.09    0.72
 -10  -6  -1    7.46    0.75
  10   6   1    7.03    0.89
 -11  -6  -1    6.57    0.74
  11   6   1    6.78    0.89
  12   6   1   -0.04    0.55
  10  -7  -1    0.77    0.67
 -10   7   1    0.19    0.53
   9  -7  -1    0.15    0.59
  -9   7   1    0.59    0.54
   8  -7  -1   52.30    2.00
  -8   7   1   53.51    1.84
   7  -7  -1   -0.05    0.48
  -7   7   1    0.13    0.43
   6  -7  -1   19.93    1.13
   6  -7  -1   19.68    0.76
  -6   7   1   20.19    1.05
   5  -7  -1   41.44    1.07
   5  -7  -1   40.69    1.49
  -5   7   1   39.50    1.40
   4  -7  -1    1.46    0.24
   4  -7  -1    1.26    0.44
  -4   7   1    0.89    0.40
   3  -7  -1   -0.49    0.28
   3  -7  -1    0.22    0.17
  -3   7   1    0.45    0.34
   2  -7  -1   43.97    0.98
   2  -7  -1   43.17    1.32
  -2   7   1   44.27    1.33
   1  -7  -1   56.85    1.51
   1  -7  -1   58.06    1.51
  -1   7   1   56.98    1.25
   0  -7  -1    0.42    0.30
   0  -7  -1    0.14    0.32
   0   7   1    0.34    0.22
  -1  -7  -1  189.16    3.77
  -1  -7  -1  180.30    3.78
   1   7   1  187.17    3.71
  -2  -7  -1   43.28    1.24
  -2  -7  -1   43.31    1.14
   2   7   1   43.16    1.19
  -3  -7  -1   23.76    0.87
  -3  -7  -1   24.93    0.79
   3   7   1   26.08    0.91
  -4  -7  -1    3.85    0.46
  -4  -7  -1    3.32    0.34
   4   7   1    3.59    0.48
  -5  -7  -1   36.25    1.14
  -5  -7  -1   36.33    1.02
   5   7   1   37.90    1.27
  -6  -7  -1    9.93    0.69
  -6  -7  -1   12.28    0.64
   6   7   1   11.62    0.80
  -7  -7  -1   -0.54    0.32
  -7  -7  -1    0.09    0.30
   7   7   1   -0.49    0.35
  -8  -7  -1    1.83    0.46
  -8  -7  -1    2.07    0.42
   8   7   1    1.18    0.53
  -9  -7  -1    6.50    0.67
  -9  -7  -1    7.44    0.66
   9   7   1    7.06    0.86
 -10  -7  -1   12.03    0.91
  10   7   1   13.25    1.10
 -11  -7  -1    3.64    0.63
  11   7   1    2.76    0.71
  12   7   1    5.17    0.88
  10  -8  -1    1.09    0.64
 -10   8   1    0.93    0.58
   9  -8  -1    4.52    0.86
  -9   8   1    5.20    0.79
   8  -8  -1   18.84    1.30
  -8   8   1   19.96    1.17
   7  -8  -1   17.02    1.08
  -7   8   1   16.12    1.05
   6  -8  -1    0.95    0.48
   5  -8  -1   -0.91    0.36
  -5   8   1   -0.24    0.41
   4  -8  -1    1.20    0.43
   4  -8  -1    0.86    0.21
  -4   8   1    0.31    0.38
   3  -8  -1   14.64    0.88
   3  -8  -1   14.10    0.48
  -3   8   1   14.27    0.79
   2  -8  -1   29.89    1.10
  -2   8   1   31.11    0.77
  -2   8   1   29.35    1.07
   1  -8  -1   63.57    1.69
   1  -8  -1   61.74    1.68
  -1   8   1   64.90    1.41
   0  -8  -1   33.67    1.09
   0  -8  -1   35.43    1.12
   0   8   1   34.07    0.93
  -1  -8  -1   23.26    0.83
  -1  -8  -1   23.71    0.92
   1   8   1   21.98    0.77
  -2  -8  -1   15.30    0.65
  -2  -8  -1   14.75    0.76
   2   8   1   14.72    0.70
  -3  -8  -1   14.51    0.62
  -3  -8  -1   14.17    0.71
   3   8   1   14.54    0.77
  -4  -8  -1    2.26    0.31
  -4  -8  -1    2.19    0.38
   4   8   1    2.03    0.40
  -5  -8  -1   41.25    1.13
  -5  -8  -1   41.90    1.30
   5   8   1   41.77    1.38
  -6  -8  -1   12.72    0.60
  -6  -8  -1   11.53    0.75
   6   8   1   14.19    0.86
  -7  -8  -1    2.70    0.38
  -7  -8  -1    1.82    0.44
   7   8   1    3.15    0.55
  -8  -8  -1   17.04    0.85
  -8  -8  -1   16.04    0.94
   8   8   1   19.03    1.11
  -9  -8  -1   36.54    1.39
   9   8   1   37.84    1.61
 -10  -8  -1    5.60    0.69
  10   8   1    5.12    0.83
 -11  -8  -1   24.94    1.22
  11   8   1   20.43    1.32
  12   8   1    1.00    0.69
  10  -9  -1    2.34    0.75
 -10   9   1    2.76    0.72
   9  -9  -1    3.83    0.84
  -9   9   1    3.38    0.73
   8  -9  -1    4.63    0.82
  -8   9   1    4.24    0.71
   7  -9  -1   34.39    1.59
  -7   9   1   31.07    1.41
   6  -9  -1   30.69    1.39
  -6   9   1   30.88    1.30
   5  -9  -1   19.32    1.12
  -5   9   1   19.42    1.02
   4  -9  -1    8.06    0.74
  -4   9   1    8.15    0.72
   3  -9  -1    8.40    0.73
   3  -9  -1    9.95    0.41
  -3   9   1   10.74    0.75
   2  -9  -1   78.91    2.10
  -2   9   1   79.89    1.68
  -2   9   1   77.61    2.06
   1  -9  -1   17.53    0.84
   1  -9  -1   18.46    0.92
  -1   9   1   19.38    0.64
   0  -9  -1    1.82    0.39
   0  -9  -1    1.90    0.37
   0   9   1    2.14    0.29
  -1  -9  -1  181.09    3.75
  -1  -9  -1  177.78    3.80
   1   9   1  174.61    3.63
  -2  -9  -1    0.41    0.27
  -2  -9  -1    0.28    0.31
   2   9   1    0.21    0.29
  -3  -9  -1   44.39    1.19
  -3  -9  -1   43.33    1.32
   3   9   1   43.45    1.30
  -4  -9  -1   19.89    0.88
  -4  -9  -1   20.80    0.75
   4   9   1   21.09    0.92
  -5  -9  -1   18.13    0.86
  -5  -9  -1   18.45    0.73
   5   9   1   19.53    0.94
  -6  -9  -1    0.45    0.27
  -6  -9  -1    0.98    0.40
   6   9   1   -0.16    0.42
  -7  -9  -1    4.46    0.45
  -7  -9  -1    5.60    0.62
   7   9   1    3.99    0.64
  -8  -9  -1    1.88    0.38
  -8  -9  -1    1.42    0.47
   8   9   1    0.96    0.51
  -9  -9  -1    0.30    0.44
   9   9   1   -0.15    0.50
 -10  -9  -1    9.09    0.86
  10   9   1    8.81    0.97
 -11  -9  -1   -0.18    0.46
  11   9   1   -0.47    0.60
  12   9   1    0.45    0.70
   9 -10  -1    3.60    0.82
  -9  10   1    4.05    0.78
   8 -10  -1    3.98    0.75
  -8  10   1    4.43    0.76
   7 -10  -1    4.69    0.78
  -7  10   1    4.02    0.70
   6 -10  -1   12.54    1.06
  -6  10   1   13.27    1.02
   5 -10  -1   48.44    1.74
  -5  10   1   50.51    1.70
   4 -10  -1    1.46    0.47
  -4  10   1    0.98    0.49
   3 -10  -1    1.00    0.43
  -3  10   1    1.04    0.45
   2 -10  -1    5.20    0.60
  -2  10   1    5.96    0.39
  -2  10   1    6.21    0.66
   1 -10  -1   79.49    2.07
   1 -10  -1   77.29    2.08
  -1  10   1   78.11    1.73
   0 -10  -1   11.07    0.73
   0 -10  -1   11.28    0.74
   0  10   1   12.24    0.60
  -1 -10  -1    2.79    0.47
  -1 -10  -1    2.42    0.39
   1  10   1    1.74    0.33
  -2 -10  -1  115.21    2.70
  -2 -10  -1  116.18    2.57
   2  10   1  112.33    2.58
  -3 -10  -1   29.40    1.13
  -3 -10  -1   28.51    0.94
   3  10   1   29.63    1.08
  -4 -10  -1    0.67    0.29
  -4 -10  -1    0.62    0.39
   4  10   1    0.73    0.41
  -5 -10  -1   22.67    0.82
  -5 -10  -1   23.90    1.04
   5  10   1   24.37    1.12
  -6 -10  -1   56.79    1.69
  -6 -10  -1   55.26    1.43
   6  10   1   57.25    1.81
  -7 -10  -1   30.41    1.02
  -7 -10  -1   31.55    1.23
   7  10   1   29.45    1.34
  -8 -10  -1   16.20    1.00
   8  10   1   15.99    1.07
  -9 -10  -1    0.49    0.45
   9  10   1   -0.52    0.45
 -10 -10  -1    6.17    0.76
  10  10   1    4.35    0.79
 -11 -10  -1   12.79    1.05
  11  10   1   14.51    1.29
  12  10   1    2.54    0.74
   9 -11  -1    6.59    1.02
  -9  11   1    7.81    0.97
   8 -11  -1    0.69    0.60
  -8  11   1   -0.69    0.49
   7 -11  -1   13.88    1.22
  -7  11   1   15.75    1.09
   6 -11  -1    0.66    0.58
  -6  11   1    0.76    0.53
   5 -11  -1    9.80    0.92
  -5  11   1   11.16    0.95
   4 -11  -1    0.21    0.47
  -4  11   1    0.04    0.45
   3 -11  -1    0.22    0.46
  -3  11   1   -0.20    0.38
   2 -11  -1   14.64    0.89
  -2  11   1   15.60    0.90
  -2  11   1   16.68    0.61
   1 -11  -1   -0.26    0.39
   1 -11  -1    0.73    0.41
  -1  11   1    0.48    0.24
   0 -11  -1    0.16    0.36
   0 -11  -1   -0.54    0.30
   0  11   1    0.46    0.26
  -1 -11  -1   40.78    1.27
  -1 -11  -1   40.53    1.39
   1  11   1   37.74    1.16
  -2 -11  -1    0.15    0.30
  -2 -11  -1    0.23    0.35
   2  11   1    0.20    0.31
  -3 -11  -1   12.43    0.67
  -3 -11  -1   11.92    0.76
   3  11   1   12.39    0.77
  -4 -11  -1   10.41    0.81
  -4 -11  -1   10.93    0.62
   4  11   1   10.57    0.74
  -5 -11  -1    2.54    0.38
  -5 -11  -1    2.21    0.51
   5  11   1    1.48    0.49
  -6 -11  -1   -0.35    0.37
  -6 -11  -1    0.34    0.27
   6  11   1    0.53    0.45
  -7 -11  -1    2.76    0.56
   7  11   1    2.19    0.56
  -8 -11  -1    2.37    0.56
   8  11   1    2.70    0.64
  -9 -11  -1    1.57    0.53
   9  11   1    0.84    0.58
 -10 -11  -1   -0.01    0.50
  10  11   1    0.30    0.56
 -11 -11  -1    0.82    0.52
  11  11   1   -0.23    0.58
  12  11   1    0.84    0.71
  -8  12   1    4.72    0.81
   7 -12  -1    0.05    0.60
  -7  12   1   -0.03    0.49
   6 -12  -1    0.30    0.53
  -6  12   1   -0.66    0.46
   5 -12  -1    0.15    0.48
  -5  12   1    0.24    0.47
   4 -12  -1    2.80    0.61
  -4  12   1    2.74    0.61
   3 -12  -1    0.02    0.42
  -3  12   1   -0.88    0.43
   2 -12  -1    1.55    0.48
  -2  12   1    1.44    0.47
   1 -12  -1    4.51    0.66
   1 -12  -1    2.75    0.53
  -1  12   1    3.05    0.36
   0 -12  -1    4.99    0.62
   0 -12  -1    5.43    0.60
   0  12   1    5.90    0.48
  -1 -12  -1    0.13    0.40
  -1 -12  -1   -0.14    0.32
   1  12   1   -0.27    0.26
  -2 -12  -1   38.03    1.37
  -2 -12  -1   37.46    1.20
   2  12   1   36.40    1.22
  -3 -12  -1   -0.05    0.35
  -3 -12  -1    0.03    0.31
   3  12   1    0.33    0.35
  -4 -12  -1    0.15    0.28
  -4 -12  -1    0.29    0.42
   4  12   1    0.10    0.35
  -5 -12  -1   16.54    0.75
  -5 -12  -1   17.27    0.96
   5  12   1   17.80    0.99
  -6 -12  -1    7.27    0.76
  -6 -12  -1    7.76    0.56
   6  12   1    7.74    0.80
  -7 -12  -1    1.42    0.49
   7  12   1    0.59    0.50
  -8 -12  -1   28.31    1.29
   8  12   1   24.85    1.37
  -9 -12  -1    0.85    0.52
   9  12   1    1.02    0.58
 -10 -12  -1   -0.15    0.51
  10  12   1    1.09    0.60
 -11 -12  -1    0.49    0.56
  11  12   1    1.69    0.67
   8 -13  -1    2.11    0.75
  -8  13   1    1.50    0.66
   7 -13  -1   -0.39    0.59
  -7  13   1    0.38    0.60
   6 -13  -1    1.25    0.59
  -6  13   1    0.96    0.59
   5 -13  -1   18.41    1.16
  -5  13   1   16.68    1.08
   4 -13  -1    3.14    0.66
  -4  13   1    3.13    0.67
   3 -13  -1    1.89    0.53
  -3  13   1    1.59    0.56
   2 -13  -1    1.65    0.52
  -2  13   1    0.20    0.49
   1 -13  -1    1.47    0.51
   1 -13  -1    1.41    0.47
   0 -13  -1   -0.58    0.37
   0 -13  -1   -0.08    0.37
   0  13   1   -0.60    0.30
  -1 -13  -1    0.16    0.45
  -1 -13  -1    1.37    0.42
   1  13   1    1.49    0.37
  -2 -13  -1    7.34    0.64
  -2 -13  -1    6.51    0.71
   2  13   1    6.70    0.62
  -3 -13  -1    5.02    0.53
  -3 -13  -1    5.30    0.67
   3  13   1    5.29    0.61
  -4 -13  -1    1.55    0.37
  -4 -13  -1    2.45    0.51
   4  13   1    2.32    0.51
  -5 -13  -1   14.37    0.74
  -5 -13  -1   14.87    0.94
   5  13   1   14.51    1.00
  -6 -13  -1   23.79    1.20
   6  13   1   23.90    1.22
  -7 -13  -1   20.52    1.11
   7  13   1   21.43    1.25
  -8 -13  -1    6.69    0.79
   8  13   1    5.92    0.82
  -9 -13  -1    5.03    0.75
   9  13   1    4.51    0.80
 -10 -13  -1    9.25    0.96
  10  13   1    8.05    1.00
 -11 -13  -1    0.30    0.52
  11  13   1   -0.41    0.57
   7 -14  -1    4.12    0.88
  -7  14   1    5.15    0.79
   6 -14  -1    0.08    0.55
  -6  14   1    0.78    0.61
   5 -14  -1    2.72    0.76
  -5  14   1    2.19    0.65
   4 -14  -1   -0.27    0.54
  -4  14   1    0.25    0.52
   3 -14  -1    7.18    0.85
  -3  14   1    8.42    0.94
   2 -14  -1    0.24    0.46
  -2  14   1   -0.40    0.47
   1 -14  -1    0.33    0.43
   1 -14  -1    0.00    0.43
   0 -14  -1   -0.24    0.38
   0 -14  -1   -0.31    0.43
  -1 -14  -1   -0.14    0.44
  -1 -14  -1    0.46    0.41
   1  14   1    0.43    0.34
  -2 -14  -1    2.28    0.56
  -2 -14  -1    2.54    0.49
   2  14   1    3.08    0.50
  -3 -14  -1    5.09    0.55
  -3 -14  -1    4.25    0.65
   3  14   1    3.93    0.60
  -4 -14  -1    3.60    0.64
  -4 -14  -1    3.84    0.50
   4  14   1    4.32    0.62
  -5 -14  -1   60.09    1.94
   5  14   1   54.94    1.88
  -6 -14  -1    9.15    0.89
   6  14   1    9.56    0.91
  -7 -14  -1    3.82    0.65
   7  14   1    4.04    0.77
  -8 -14  -1   36.46    1.62
   8  14   1   34.56    1.65
  -9 -14  -1    0.27    0.53
   9  14   1    0.92    0.60
 -10 -14  -1    1.46    0.65
  10  14   1    0.95    0.68
 -11 -14  -1    3.10    0.71
  11  14   1    2.71    0.79
   6 -15  -1    2.93    0.77
  -6  15   1    4.09    0.77
   5 -15  -1   12.28    1.17
  -5  15   1   11.15    1.06
   4 -15  -1   17.53    1.21
  -4  15   1   17.09    1.17
   3 -15  -1    0.18    0.50
  -3  15   1    0.11    0.48
   2 -15  -1    1.62    0.54
  -2  15   1    2.75    0.66
   1 -15  -1   15.19    1.01
  -1  15   1   13.30    1.06
   0 -15  -1    0.83    0.55
   0 -15  -1    0.80    0.48
  -1 -15  -1    1.50    0.49
  -1 -15  -1    1.72    0.55
   1  15   1    1.15    0.40
  -2 -15  -1    4.34    0.71
  -2 -15  -1    2.02    0.48
   2  15   1    2.52    0.52
  -3 -15  -1    2.26    0.60
  -3 -15  -1    1.98    0.46
   3  15   1    1.14    0.49
  -4 -15  -1    7.93    0.87
  -4 -15  -1    9.22    0.69
   4  15   1    6.96    0.77
  -5 -15  -1    0.93    0.54
   5  15   1   -0.51    0.43
  -6 -15  -1   22.18    1.25
   6  15   1   23.58    1.31
  -7 -15  -1    4.25    0.74
   7  15   1    4.60    0.80
  -8 -15  -1   26.91    1.40
   8  15   1   27.62    1.51
  -9 -15  -1    2.85    0.71
   9  15   1    3.27    0.78
 -10 -15  -1    1.16    0.60
  10  15   1    1.25    0.67
   5 -16  -1   10.05    1.07
  -5  16   1    9.23    1.00
   4 -16  -1    0.24    0.55
  -4  16   1    0.59    0.59
   3 -16  -1    0.17    0.46
  -3  16   1    0.28    0.55
   2 -16  -1    3.46    0.71
  -2  16   1    5.60    0.83
   1 -16  -1   -0.14    0.49
  -1  16   1    0.54    0.57
   0 -16  -1    2.74    0.72
   0 -16  -1    2.55    0.60
  -1 -16  -1    4.32    0.63
  -1 -16  -1    3.81    0.71
  -2 -16  -1    2.74    0.71
  -2 -16  -1    3.78    0.59
   2  16   1    4.10    0.56
  -3 -16  -1    0.12    0.50
  -3 -16  -1   -0.20    0.39
   3  16   1    0.78    0.43
  -4 -16  -1    0.26    0.48
   4  16   1    0.08    0.49
  -5 -16  -1    6.74    0.85
   5  16   1    6.36    0.79
  -6 -16  -1    0.37    0.55
   6  16   1   -0.59    0.52
  -7 -16  -1    0.33    0.50
   7  16   1   -0.06    0.50
  -8 -16  -1   -0.82    0.47
   8  16   1   -0.25    0.55
  -9 -16  -1    3.92    0.72
   9  16   1    4.02    0.84
 -10 -16  -1    0.83    0.63
  10  16   1    2.65    0.81
   5 -17  -1    5.33    0.87
  -5  17   1    5.18    0.82
   4 -17  -1    9.16    1.04
  -4  17   1    7.15    0.96
   3 -17  -1    2.69    0.80
  -3  17   1    2.07    0.69
   2 -17  -1   22.07    1.27
  -2  17   1   18.55    1.21
   1 -17  -1    4.13    0.73
  -1  17   1    4.07    0.79
   0 -17  -1   -0.07    0.50
   0 -17  -1   -0.43    0.46
  -1 -17  -1    0.10    0.54
  -1 -17  -1   -0.18    0.53
  -2 -17  -1    2.62    0.67
  -2 -17  -1    2.81    0.59
  -3 -17  -1   -0.21    0.54
  -3 -17  -1    0.23    0.41
   3  17   1   -0.72    0.42
  -4 -17  -1    0.56    0.55
   4  17   1    0.51    0.53
  -5 -17  -1   21.55    1.26
   5  17   1   23.06    1.32
  -6 -17  -1    0.41    0.58
   6  17   1    2.69    0.73
  -7 -17  -1    5.20    0.79
   7  17   1    5.29    0.86
  -8 -17  -1    3.12    0.72
   8  17   1    2.85    0.76
  -9 -17  -1    5.09    0.85
   9  17   1    6.22    0.94
   3 -18  -1    2.24    0.70
  -3  18   1    2.20    0.72
   2 -18  -1   -0.86    0.51
  -2  18   1   -0.15    0.56
   1 -18  -1   14.62    1.19
  -1  18   1   15.22    1.29
   0 -18  -1    3.40    0.78
   0 -18  -1    2.16    0.61
  -1 -18  -1    1.13    0.60
  -1 -18  -1    0.81    0.61
  -2 -18  -1    5.92    0.74
  -2 -18  -1    8.33    1.00
  -3 -18  -1    2.45    0.72
  -4 -18  -1    0.08    0.47
   4  18   1    0.32    0.53
  -5 -18  -1   18.58    1.29
   5  18   1   18.62    1.20
  -6 -18  -1   19.64    1.30
   6  18   1   22.60    1.34
  -7 -18  -1   15.16    1.22
   7  18   1   12.58    1.19
  -8 -18  -1    7.32    0.96
   8  18   1    7.42    1.02
   2 -19  -1    3.45    0.78
  -2  19   1    3.92    0.77
   1 -19  -1    4.36    0.79
  -1  19   1    4.65    0.86
   0 -19  -1    1.88    0.74
   0 -19  -1    0.75    0.59
   0  19   1    1.19    0.64
  -1 -19  -1    3.80    0.70
  -1 -19  -1    2.84    0.82
  -2 -19  -1    9.68    1.11
  -3 -19  -1    2.64    0.73
  -4 -19  -1    0.20    0.60
  -5 -19  -1    9.08    1.10
   5  19   1    9.54    1.00
  -6 -19  -1    0.21    0.59
   6  19   1    0.30    0.59
  -7 -19  -1   -0.15    0.59
   7  19   1    0.11    0.59
   0 -20  -1    1.06    0.62
   0  20   1    1.23    0.66
  -1 -20  -1    0.31    0.49
  -1 -20  -1    0.72    0.69
  -2 -20  -1    9.12    1.14
  -3 -20  -1    5.52    0.97
  -4 -20  -1   -0.01    0.54
  -5 -20  -1    2.95    0.77
  -4 -20   2    3.31    0.89
  -3 -20   2    3.03    0.80
  -2 -20   2    5.48    0.97
  -1 -20   2    6.56    0.99
   6  19  -2   14.81    1.28
  -6 -19   2   13.19    1.24
   5  19  -2    8.67    1.03
  -5 -19   2    9.68    1.13
   4  19  -2   11.08    1.04
  -4 -19   2    8.02    1.03
  -3 -19   2    1.32    0.66
  -2 -19   2   -0.36    0.63
  -1 -19   2   15.35    1.37
   0 -19   2   22.13    1.39
  -1  19  -2   -0.12    0.59
   1 -19   2    0.99    0.65
   1 -19   2   -0.40    0.56
   7  18  -2    0.00    0.55
  -7 -18   2   -0.38    0.57
   6  18  -2    0.27    0.58
  -6 -18   2    0.58    0.60
   5  18  -2   -0.04    0.58
  -5 -18   2    1.21    0.60
   4  18  -2    5.45    0.78
  -4 -18   2    4.75    0.84
   3  18  -2   18.77    1.21
  -3 -18   2   16.05    1.30
  -2 -18   2    2.69    0.77
  -1 -18   2    1.69    0.66
   0 -18   2    3.19    0.68
   0 -18   2    3.80    0.78
   1 -18   2    3.31    0.76
   1 -18   2    2.54    0.76
  -2  18  -2    0.49    0.53
   2 -18   2    0.18    0.59
  -3  18  -2    4.32    0.82
   3 -18   2    3.58    0.78
   8  17  -2   -0.10    0.57
  -8 -17   2    0.36    0.58
   7  17  -2    0.66    0.63
  -7 -17   2    2.64    0.76
   6  17  -2   12.88    1.19
  -6 -17   2   14.32    1.20
   5  17  -2    0.30    0.57
  -5 -17   2    0.91    0.57
   4  17  -2    8.47    0.93
  -4 -17   2    8.70    0.96
   3  17  -2    6.18    0.78
  -3 -17   2    7.09    0.92
   2  17  -2    1.25    0.54
  -2 -17   2    0.81    0.58
  -1 -17   2    7.54    0.77
  -1 -17   2    7.86    0.99
   0 -17   2   14.57    0.99
   0 -17   2   11.49    1.12
   1 -17   2    1.44    0.71
   1 -17   2    1.26    0.53
  -2  17  -2    3.38    0.71
   2 -17   2    2.60    0.67
  -3  17  -2    0.85    0.55
   3 -17   2    0.05    0.54
  -4  17  -2    5.32    0.86
   4 -17   2    7.07    0.94
   9  16  -2    4.07    0.88
  -9 -16   2    5.51    0.92
   8  16  -2    4.22    0.82
  -8 -16   2    3.37    0.79
   7  16  -2    0.20    0.54
  -7 -16   2    0.53    0.53
   6  16  -2    1.30    0.58
  -6 -16   2    0.70    0.60
   5  16  -2    0.43    0.52
  -5 -16   2    0.49    0.55
   4  16  -2    0.78    0.55
  -4 -16   2   -0.04    0.52
   3  16  -2    0.78    0.52
  -3 -16   2    0.91    0.55
   2  16  -2    9.62    0.86
  -2 -16   2    9.95    1.00
   1  16  -2    3.58    0.60
  -1 -16   2    4.94    0.60
  -1 -16   2    5.86    0.83
   0 -16   2    8.45    0.83
   0 -16   2    8.75    0.96
   1 -16   2   -0.53    0.54
   1 -16   2    0.28    0.50
  -2  16  -2    1.43    0.59
   2 -16   2    1.90    0.57
  -3  16  -2   24.97    1.39
   3 -16   2   24.47    1.35
  -4  16  -2    2.09    0.66
   4 -16   2    1.83    0.71
  -5  16  -2    7.70    0.95
   5 -16   2    8.63    1.05
  10  15  -2    2.80    0.79
 -10 -15   2    1.17    0.63
   9  15  -2    4.65    0.92
  -9 -15   2    4.42    0.77
   8  15  -2    3.45    0.80
  -8 -15   2    1.95    0.65
   7  15  -2    8.11    0.93
  -7 -15   2    8.09    0.96
   6  15  -2   11.82    1.07
  -6 -15   2   10.66    1.01
   5  15  -2    2.60    0.65
  -5 -15   2    3.84    0.73
   4  15  -2    8.55    0.87
  -4 -15   2    6.94    0.83
   3  15  -2   55.75    1.86
  -3 -15   2   59.42    2.03
   2  15  -2    4.10    0.61
  -2 -15   2    3.25    0.50
  -2 -15   2    4.78    0.77
   1  15  -2    4.88    0.63
  -1 -15   2    4.96    0.61
  -1 -15   2    3.12    0.72
   0  15  -2    0.87    0.42
   0 -15   2    1.04    0.46
   0 -15   2    1.35    0.54
   1 -15   2    6.56    0.72
   1 -15   2    7.48    0.92
  -2  15  -2    9.08    0.92
   2 -15   2   10.66    0.94
  -3  15  -2    2.51    0.63
   3 -15   2    3.49    0.70
  -4  15  -2    5.70    0.84
   4 -15   2    4.74    0.76
  -5  15  -2    3.38    0.78
   5 -15   2    2.19    0.71
  -6  15  -2    4.42    0.78
   6 -15   2    3.74    0.83
  10  14  -2    8.27    1.08
 -10 -14   2    8.66    1.00
   9  14  -2    3.37    0.81
  -9 -14   2    3.92    0.74
   8  14  -2    0.53    0.58
  -8 -14   2    0.52    0.58
   7  14  -2   13.37    1.14
  -7 -14   2   11.72    1.05
   6  14  -2    1.31    0.61
  -6 -14   2    2.33    0.63
   5  14  -2   12.07    1.03
  -5 -14   2    7.53    0.83
   4  14  -2   13.47    1.02
  -4 -14   2   11.76    1.02
   3  14  -2    0.03    0.37
  -3 -14   2    0.23    0.49
   2  14  -2    1.94    0.53
  -2 -14   2    1.82    0.42
  -2 -14   2    0.65    0.50
   1  14  -2    4.61    0.59
  -1 -14   2    4.90    0.72
  -1 -14   2    5.87    0.61
   0  14  -2    0.16    0.38
   0 -14   2   -0.02    0.51
   0 -14   2    0.15    0.39
   1 -14   2    3.21    0.63
   1 -14   2    3.46    0.60
   2 -14   2   14.18    1.00
   2 -14   2   13.31    1.05
  -3  14  -2   14.56    1.01
   3 -14   2   15.82    1.09
  -4  14  -2    2.83    0.66
   4 -14   2    3.39    0.68
  -5  14  -2    0.89    0.60
   5 -14   2    1.00    0.56
  -6  14  -2    0.62    0.55
   6 -14   2   -0.30    0.55
  -7  14  -2   -0.01    0.54
   7 -14   2    0.18    0.65
  11  13  -2    0.83    0.73
 -11 -13   2    2.24    0.71
  10  13  -2    7.29    1.00
 -10 -13   2    5.68    0.83
   9  13  -2    2.59    0.77
  -9 -13   2    3.48    0.74
   8  13  -2    0.44    0.56
  -8 -13   2   -0.28    0.49
   7  13  -2    3.46    0.72
  -7 -13   2    3.44    0.67
   6  13  -2   18.69    1.12
  -6 -13   2   18.10    1.13
   5  13  -2   33.69    1.45
  -5 -13   2   33.04    1.46
   4  13  -2   -0.11    0.46
  -4 -13   2   -0.08    0.41
   3  13  -2   21.85    1.12
  -3 -13   2   23.42    1.15
  -3 -13   2   22.96    0.88
   2  13  -2   10.36    0.79
  -2 -13   2   10.61    0.89
  -2 -13   2   10.28    0.68
   1  13  -2   20.04    0.95
  -1 -13   2   19.84    1.14
  -1 -13   2   20.14    0.91
   0  13  -2    1.09    0.40
   0 -13   2    0.71    0.41
   0 -13   2    0.79    0.51
  -1  13  -2   21.08    0.93
   1 -13   2   20.60    1.17
   1 -13   2   22.68    1.10
   2 -13   2   -0.61    0.47
   2 -13   2    0.94    0.47
  -3  13  -2   16.18    1.01
   3 -13   2   15.85    1.05
  -4  13  -2   -0.61    0.45
   4 -13   2   -0.60    0.41
  -5  13  -2    0.76    0.71
   5 -13   2    0.36    0.57
  -6  13  -2    0.70    0.56
   6 -13   2    2.07    0.71
  -7  13  -2   -0.50    0.46
   7 -13   2    1.40    0.67
  11  12  -2    5.83    0.93
 -11 -12   2    6.24    0.89
  10  12  -2   16.95    1.39
 -10 -12   2   15.46    1.23
   9  12  -2    1.03    0.55
  -9 -12   2   -0.29    0.47
   8  12  -2    1.97    0.63
  -8 -12   2    2.38    0.63
   7  12  -2    4.38    0.72
  -7 -12   2    3.84    0.66
   6  12  -2    0.26    0.46
  -6 -12   2   -0.06    0.42
   5  12  -2    0.28    0.49
  -5 -12   2    0.19    0.40
   4  12  -2    9.66    0.81
  -4 -12   2    8.36    0.80
   3  12  -2    2.60    0.54
  -3 -12   2    3.43    0.39
  -3 -12   2    2.32    0.57
   2  12  -2    1.91    0.46
  -2 -12   2    2.34    0.39
  -2 -12   2    2.19    0.53
   1  12  -2    9.95    0.72
  -1 -12   2    9.03    0.67
  -1 -12   2    8.72    0.81
   0  12  -2    8.52    0.67
   0 -12   2    9.43    0.71
   0 -12   2    8.16    0.78
  -1  12  -2    6.89    0.57
   1 -12   2    5.97    0.65
   1 -12   2    5.52    0.71
  -2  12  -2   19.78    0.83
   2 -12   2   17.09    1.04
   2 -12   2   19.24    1.04
  -3  12  -2    2.42    0.56
   3 -12   2    1.61    0.51
  -4  12  -2    1.29    0.55
   4 -12   2    1.05    0.58
  -5  12  -2   -0.23    0.47
   5 -12   2    1.30    0.57
  -6  12  -2    2.33    0.63
   6 -12   2    1.52    0.68
  -7  12  -2    1.91    0.63
   7 -12   2    2.38    0.77
  -8  12  -2    1.33    0.62
   8 -12   2    1.48    0.73
  11  11  -2   -0.27    0.62
 -11 -11   2   -0.95    0.51
  10  11  -2    4.88    0.87
 -10 -11   2    3.67    0.74
   9  11  -2   -0.20    0.57
  -9 -11   2    0.59    0.47
   8  11  -2   14.58    1.16
  -8 -11   2   11.59    1.00
   7  11  -2   20.22    1.16
  -7 -11   2   19.54    1.09
   6  11  -2   38.17    1.51
  -6 -11   2   41.86    1.52
   5  11  -2    3.17    0.57
  -5 -11   2    3.13    0.54
   4  11  -2   19.00    0.97
  -4 -11   2   18.10    0.64
  -4 -11   2   16.37    0.95
   3  11  -2   21.41    1.04
  -3 -11   2   23.34    0.78
  -3 -11   2   24.38    1.12
   2  11  -2   14.03    0.82
  -2 -11   2   15.47    0.70
  -2 -11   2   13.02    0.82
   1  11  -2   42.23    1.34
  -1 -11   2   41.60    1.43
  -1 -11   2   43.65    1.30
   0  11  -2   83.50    2.08
   0 -11   2   82.77    2.26
   0 -11   2   83.96    2.11
  -1  11  -2    0.99    0.34
   1 -11   2    0.52    0.40
   1 -11   2    0.97    0.41
   2 -11   2    0.66    0.45
   2 -11   2    0.91    0.29
   2 -11   2    0.77    0.44
  -3  11  -2   35.34    1.39
   3 -11   2   35.61    1.42
   3 -11   2   36.54    1.10
  -4  11  -2    2.94    0.59
   4 -11   2    1.55    0.52
  -5  11  -2    9.85    0.88
   5 -11   2    9.09    0.95
  -6  11  -2    6.94    0.82
   6 -11   2    9.59    1.00
  -7  11  -2    1.94    0.61
   7 -11   2    2.54    0.74
  -8  11  -2    2.80    0.67
   8 -11   2    1.94    0.74
  -9  11  -2    1.57    0.65
   9 -11   2    2.00    0.79
  12  10  -2    1.10    0.75
 -12 -10   2    1.13    0.63
  11  10  -2    0.59    0.64
 -11 -10   2    1.23    0.58
  10  10  -2    6.22    0.93
 -10 -10   2    6.65    0.82
   9  10  -2    3.62    0.79
  -9 -10   2    4.05    0.68
   8  10  -2    1.50    0.57
  -8 -10   2    1.51    0.49
   7  10  -2   15.09    1.11
  -7 -10   2   12.94    0.97
   6  10  -2    1.63    0.52
  -6 -10   2    1.79    0.49
   5  10  -2    8.33    0.78
  -5 -10   2    7.41    0.73
   4  10  -2    3.98    0.55
  -4 -10   2    4.67    0.33
  -4 -10   2    3.77    0.55
   3  10  -2    1.08    0.41
  -3 -10   2    1.25    0.45
  -3 -10   2    1.22    0.27
   2  10  -2    1.45    0.39
  -2 -10   2    1.78    0.43
  -2 -10   2    1.65    0.29
   1  10  -2   27.85    1.02
  -1 -10   2   27.59    0.96
  -1 -10   2   27.94    1.10
   0  10  -2   16.45    0.74
   0 -10   2   15.69    0.78
   0 -10   2   15.19    0.85
  -1  10  -2   34.25    1.09
   1 -10   2   36.08    1.23
   1 -10   2   35.63    1.31
   2 -10   2   28.12    1.18
   2 -10   2   29.74    1.15
   2 -10   2   30.11    0.97
  -3  10  -2    3.69    0.57
   3 -10   2    4.65    0.45
   3 -10   2    2.93    0.57
  -4  10  -2   -0.27    0.39
   4 -10   2    0.10    0.40
   4 -10   2    0.13    0.28
  -5  10  -2    1.91    0.57
   5 -10   2    2.16    0.58
  -6  10  -2    3.81    0.65
   6 -10   2    3.45    0.73
  -7  10  -2    1.18    0.51
   7 -10   2    1.79    0.64
  -8  10  -2    3.98    0.71
   8 -10   2    5.13    0.87
  -9  10  -2    1.09    0.59
   9 -10   2    0.94    0.68
  12   9  -2   26.55    1.57
 -12  -9   2   24.88    1.43
  11   9  -2    0.82    0.68
 -11  -9   2    0.12    0.51
  10   9  -2    0.19    0.61
 -10  -9   2    0.79    0.50
   9   9  -2   34.57    1.56
  -9  -9   2   35.70    1.48
   8   9  -2    2.75    0.66
  -8  -9   2    3.57    0.59
   7   9  -2    5.62    0.76
  -7  -9   2    4.98    0.64
   6   9  -2   23.71    1.13
  -6  -9   2   21.57    1.03
   5   9  -2    0.09    0.37
  -5  -9   2    0.21    0.16
  -5  -9   2   -0.13    0.37
   4   9  -2   40.15    1.39
  -4  -9   2   41.92    1.40
  -4  -9   2   40.16    0.96
   3   9  -2   18.15    0.91
  -3  -9   2   17.79    0.60
  -3  -9   2   18.86    0.89
   2   9  -2   12.39    0.69
  -2  -9   2   12.98    0.57
  -2  -9   2   12.87    0.79
   1   9  -2   28.13    0.98
  -1  -9   2   28.03    1.05
  -1  -9   2   26.33    0.88
   0   9  -2    2.79    0.38
   0  -9   2    2.03    0.42
   0  -9   2    3.06    0.42
   1  -9   2    0.35    0.27
   1  -9   2    0.53    0.33
   1  -9   2    0.15    0.34
   2  -9   2   18.17    0.93
   2  -9   2   19.70    0.76
   2  -9   2   20.34    0.95
  -3   9  -2   43.96    1.42
   3  -9   2   44.31    1.51
   3  -9   2   44.82    1.23
  -4   9  -2    1.38    0.42
   4  -9   2    1.26    0.33
   4  -9   2    1.15    0.45
  -5   9  -2   40.31    1.43
   5  -9   2   40.00    1.19
   5  -9   2   37.19    1.55
  -6   9  -2   46.22    1.59
   6  -9   2   41.35    1.69
  -7   9  -2   -0.18    0.47
   7  -9   2    0.60    0.54
  -8   9  -2    4.68    0.74
   8  -9   2    5.51    0.88
  -9   9  -2    0.94    0.59
   9  -9   2    2.37    0.74
  12   8  -2    6.87    0.98
 -12  -8   2    6.36    0.87
  11   8  -2    8.23    1.03
 -11  -8   2    3.85    0.69
  10   8  -2    4.67    0.83
 -10  -8   2    5.39    0.75
   9   8  -2   14.44    1.14
  -9  -8   2   14.34    0.97
   8   8  -2   15.45    1.04
  -8  -8   2   15.98    0.96
   7   8  -2    3.14    0.58
  -7  -8   2    3.35    0.57
   6   8  -2    6.35    0.66
  -6  -8   2    6.28    0.36
  -6  -8   2    6.02    0.64
   5   8  -2    0.08    0.37
  -5  -8   2    0.75    0.36
  -5  -8   2    0.18    0.15
   4   8  -2    0.28    0.35
  -4  -8   2    0.56    0.40
  -4  -8   2    0.65    0.16
   3   8  -2  102.91    2.48
  -3  -8   2  102.64    2.46
  -3  -8   2  105.68    2.13
   2   8  -2    6.81    0.54
  -2  -8   2    6.15    0.56
  -2  -8   2    6.11    0.41
   1   8  -2   -0.19    0.26
  -1  -8   2   -0.11    0.28
  -1  -8   2    0.29    0.24
   0   8  -2    1.28    0.32
   0  -8   2    1.35    0.36
   0  -8   2    1.54    0.35
   1  -8   2    0.48    0.34
   1  -8   2    0.49    0.27
   1  -8   2   -0.05    0.25
   2  -8   2   -0.18    0.26
   2  -8   2   -0.14    0.29
   2  -8   2   -0.37    0.29
  -3   8  -2    2.10    0.43
   3  -8   2    1.53    0.45
   3  -8   2    2.56    0.35
  -4   8  -2    0.80    0.41
   4  -8   2    0.87    0.44
   4  -8   2    1.58    0.35
  -5   8  -2   -0.16    0.37
   5  -8   2    0.14    0.47
   5  -8   2    0.96    0.32
  -6   8  -2   11.54    0.88
   6  -8   2   12.96    0.73
   6  -8   2   12.07    1.03
  -7   8  -2    0.35    0.48
   7  -8   2    1.01    0.57
  -8   8  -2    2.33    0.59
   8  -8   2    1.89    0.72
  -9   8  -2    2.41    0.63
   9  -8   2    1.74    0.69
  10  -8   2    5.75    0.97
  12   7  -2   11.54    1.14
 -12  -7   2   10.61    1.02
  11   7  -2    2.72    0.70
 -11  -7   2    2.74    0.63
  10   7  -2   -0.13    0.52
 -10  -7   2    0.99    0.50
   9   7  -2    1.13    0.59
  -9  -7   2    0.96    0.44
   8   7  -2   42.42    1.65
  -8  -7   2   41.24    1.48
   7   7  -2    0.76    0.43
  -7  -7   2    0.71    0.39
  -7  -7   2    0.39    0.22
   6   7  -2    2.48    0.50
  -6  -7   2    4.14    0.53
  -6  -7   2    3.61    0.28
   5   7  -2   -0.03    0.34
  -5  -7   2    0.35    0.16
  -5  -7   2   -0.03    0.32
   4   7  -2   12.62    0.81
  -4  -7   2   13.68    0.42
  -4  -7   2   12.95    0.77
   3   7  -2    3.61    0.47
  -3  -7   2    3.29    0.24
  -3  -7   2    2.66    0.42
   2   7  -2    0.94    0.32
  -2  -7   2    0.64    0.20
  -2  -7   2    0.92    0.34
   1   7  -2    6.04    0.49
  -1  -7   2    5.87    0.50
  -1  -7   2    5.86    0.41
   0   7  -2   20.51    0.77
   0  -7   2   21.35    0.77
   0  -7   2   20.07    0.84
   1  -7   2    0.01    0.28
   1  -7   2    0.21    0.29
   1  -7   2   -0.02    0.24
   2  -7   2    5.02    0.49
   2  -7   2    5.82    0.55
   2  -7   2    5.48    0.42
  -3   7  -2   15.74    0.80
   3  -7   2   16.37    0.67
   3  -7   2   16.12    0.83
  -4   7  -2   13.04    0.77
   4  -7   2   12.55    0.63
   4  -7   2   13.32    0.88
  -5   7  -2   15.77    0.86
   5  -7   2   14.81    0.93
   5  -7   2   15.45    0.74
  -6   7  -2   29.49    1.17
   6  -7   2   30.42    1.33
   6  -7   2   27.19    1.02
  -7   7  -2    0.59    0.44
   7  -7   2    0.22    0.53
   7  -7   2    0.55    0.39
  -8   7  -2    2.72    0.59
   8  -7   2    2.75    0.69
  -9   7  -2   20.79    1.17
   9  -7   2   21.31    1.39
  10  -7   2   -0.32    0.58
  12   6  -2    0.30    0.56
 -12  -6   2    0.79    0.55
  11   6  -2    1.83    0.66
 -11  -6   2    0.35    0.54
  10   6  -2    1.53    0.56
 -10  -6   2    0.96    0.52
   9   6  -2    2.67    0.57
  -9  -6   2    1.44    0.51
   8   6  -2    4.63    0.68
  -8  -6   2    5.75    0.66
  -8  -6   2    5.19    0.48
   7   6  -2    4.41    0.65
  -7  -6   2    4.21    0.56
  -7  -6   2    4.39    0.38
   6   6  -2   -0.54    0.31
  -6  -6   2    0.27    0.22
  -6  -6   2   -0.38    0.32
   5   6  -2   18.35    0.89
  -5  -6   2   17.92    0.55
  -5  -6   2   19.02    0.83
   4   6  -2   31.66    1.11
  -4  -6   2   32.14    0.73
  -4  -6   2   32.91    1.08
   3   6  -2    0.07    0.30
  -3  -6   2    0.77    0.32
  -3  -6   2    0.59    0.15
   2   6  -2  243.15    4.95
  -2  -6   2  250.27    4.71
  -2  -6   2  248.72    4.93
   1   6  -2    5.82    0.47
  -1  -6   2    6.94    0.51
  -1  -6   2    6.64    0.42
   0  -6   2    1.58    0.30
   0  -6   2    1.71    0.34
   0  -6   2    1.19    0.30
   1  -6   2   22.10    0.73
   1  -6   2   22.06    0.83
   1  -6   2   21.50    0.84
   2  -6   2    0.36    0.30
   2  -6   2    0.93    0.33
   2  -6   2    0.52    0.26
  -3   6  -2   75.05    1.85
   3  -6   2   75.52    1.96
   3  -6   2   73.44    1.73
  -4   6  -2   22.12    0.90
   4  -6   2   21.67    1.02
   4  -6   2   21.79    0.81
  -5   6  -2    1.58    0.42
   5  -6   2    2.86    0.55
   5  -6   2    2.25    0.42
  -6   6  -2    0.36    0.37
   6  -6   2   -0.09    0.42
   6  -6   2    0.74    0.35
  -7   6  -2   13.44    0.89
   7  -6   2   13.83    1.08
   7  -6   2   13.13    0.81
  -8   6  -2    1.26    0.53
   8  -6   2    0.35    0.40
   8  -6   2    1.13    0.56
  -9   6  -2    0.11    0.47
   9  -6   2    0.45    0.61
  10  -6   2   26.14    1.56
  11  -6   2   -0.25    0.57
  12   5  -2   -0.02    0.59
 -12  -5   2   -0.25    0.52
  11   5  -2    1.05    0.59
 -11  -5   2    0.73    0.52
  10   5  -2   -1.03    0.44
 -10  -5   2    1.12    0.51
   9   5  -2   20.39    1.20
  -9  -5   2   20.68    1.11
  -9  -5   2   23.55    0.95
   8   5  -2    0.85    0.50
  -8  -5   2    0.16    0.29
  -8  -5   2    0.25    0.37
   7   5  -2    5.80    0.65
  -7  -5   2    5.25    0.43
  -7  -5   2    5.18    0.60
   6   5  -2    9.83    0.74
  -6  -5   2   10.82    0.51
  -6  -5   2   10.97    0.69
   5   5  -2   31.48    1.17
  -5  -5   2   30.57    0.81
  -5  -5   2   32.35    1.11
   4   5  -2   21.27    0.87
  -4  -5   2   20.34    0.54
  -4  -5   2   21.46    0.84
   3   5  -2   30.85    1.02
  -3  -5   2   32.59    1.05
   2   5  -2   17.46    0.77
  -2  -5   2   17.80    0.72
  -2  -5   2   17.00    0.46
   1   5  -2    3.87    0.41
  -1  -5   2    3.62    0.40
  -1  -5   2    4.25    0.30
   0  -5   2   18.06    0.67
   0  -5   2   19.31    0.75
   0  -5   2   18.15    0.64
   1  -5   2    0.20    0.28
   1  -5   2    0.30    0.28
   1  -5   2    0.06    0.24
   2  -5   2   54.16    1.46
   2  -5   2   53.27    1.39
   2  -5   2   56.64    1.32
  -3   5  -2    5.83    0.49
   3  -5   2    5.80    0.54
   3  -5   2    5.54    0.41
  -4   5  -2    3.35    0.42
   4  -5   2    3.18    0.47
   4  -5   2    3.60    0.40
  -5   5  -2   11.17    0.68
   5  -5   2   11.52    0.67
   5  -5   2   11.95    0.84
  -6   5  -2   23.42    0.96
   6  -5   2   21.83    0.91
   6  -5   2   21.30    1.09
  -7   5  -2    5.83    0.63
   7  -5   2    5.91    0.61
   7  -5   2    7.07    0.80
  -8   5  -2    9.22    0.77
   8  -5   2    9.46    0.76
   8  -5   2    8.68    0.96
  -9   5  -2   23.26    1.14
   9  -5   2   23.31    1.07
   9  -5   2   21.35    1.34
  10  -5   2    0.28    0.58
  11  -5   2    1.65    0.77
  12   4  -2    1.56    0.71
 -12  -4   2    1.47    0.62
  11   4  -2    9.93    1.04
 -11  -4   2    8.62    0.90
  10   4  -2    6.61    0.80
 -10  -4   2    7.09    0.78
   9   4  -2   28.19    1.33
  -9  -4   2   26.54    1.24
  -9  -4   2   29.05    1.11
   8   4  -2    4.13    0.64
  -8  -4   2    4.52    0.59
  -8  -4   2    4.44    0.49
   7   4  -2   75.84    2.13
  -7  -4   2   78.10    2.06
  -7  -4   2   76.37    1.84
   6   4  -2   13.30    0.80
  -6  -4   2   14.24    0.80
  -6  -4   2   13.68    0.61
   5   4  -2   17.36    0.82
  -5  -4   2   15.67    0.56
  -5  -4   2   16.46    0.76
   4   4  -2  263.96    5.32
  -4  -4   2  262.58    5.00
  -4  -4   2  264.35    5.23
   3   4  -2   13.74    0.68
  -3  -4   2   13.28    0.65
   2   4  -2   19.28    0.73
  -2  -4   2   18.59    0.76
   1   4  -2    4.66    0.40
  -1  -4   2    4.60    0.41
  -1  -4   2    5.05    0.31
   0  -4   2   -0.25    0.26
   0  -4   2    0.18    0.25
   0  -4   2   -0.14    0.21
   1  -4   2    6.40    0.45
   1  -4   2    6.05    0.39
   1  -4   2    6.01    0.43
   2  -4   2   37.96    1.01
   2  -4   2   41.26    1.07
  -3   4  -2    1.89    0.32
   3  -4   2    1.35    0.34
   3  -4   2    1.75    0.31
  -4   4  -2    3.38    0.40
   4  -4   2    3.87    0.41
   4  -4   2    3.56    0.48
  -5   4  -2    3.83    0.47
   5  -4   2    3.33    0.41
   5  -4   2    2.89    0.50
  -6   4  -2   -0.32    0.29
   6  -4   2   -0.35    0.38
   6  -4   2    0.25    0.32
  -7   4  -2    1.93    0.44
   7  -4   2    2.08    0.58
   7  -4   2    2.24    0.45
  -8   4  -2   19.30    1.01
   8  -4   2   16.79    0.98
   8  -4   2   20.89    1.21
  -9   4  -2   -0.52    0.43
   9  -4   2   -0.47    0.50
   9  -4   2    0.33    0.42
  10  -4   2    3.00    0.56
  10  -4   2    1.42    0.70
  11  -4   2   -0.17    0.54
  12   3  -2    0.76    0.60
 -12  -3   2    0.09    0.55
  11   3  -2    0.85    0.61
 -11  -3   2    2.08    0.58
  10   3  -2    1.26    0.60
  10   3  -2    0.70    0.46
 -10  -3   2    0.23    0.45
   9   3  -2    9.70    0.76
   9   3  -2    7.88    0.80
  -9  -3   2    8.59    0.81
   8   3  -2   19.20    1.01
   8   3  -2   19.66    0.89
  -8  -3   2   20.24    1.02
   7   3  -2   15.11    0.73
   7   3  -2   15.18    0.91
  -7  -3   2   14.00    0.83
   6   3  -2    3.17    0.36
   6   3  -2    3.49    0.51
  -6  -3   2    3.14    0.47
   5   3  -2   24.62    0.97
   5   3  -2   22.42    0.73
  -5  -3   2   22.71    0.90
   4   3  -2    3.04    0.27
   4   3  -2    2.60    0.39
  -4  -3   2    3.01    0.39
   3   3  -2   69.92    1.69
  -3  -3   2   71.32    1.64
  -3  -3   2   68.50    1.40
   2   3  -2    0.87    0.29
  -2  -3   2   -0.27    0.24
   1   3  -2   28.94    0.85
  -1  -3   2   29.75    0.81
   0  -3   2    0.60    0.22
   0  -3   2    0.76    0.25
   0  -3   2    0.59    0.21
   1  -3   2   24.66    0.73
   1  -3   2   25.48    0.74
   1  -3   2   25.68    0.79
  -2   3  -2   17.75    0.63
   2  -3   2   19.11    0.76
   2  -3   2   17.73    0.64
  -3   3  -2   59.68    1.42
   3  -3   2   61.96    1.48
  -4   3  -2   24.53    0.84
   4  -3   2   24.72    0.85
   4  -3   2   23.74    0.99
  -5   3  -2   40.75    1.17
   5  -3   2   40.17    1.19
   5  -3   2   40.59    1.33
  -6   3  -2   11.42    0.71
   6  -3   2   10.48    0.66
   6  -3   2   11.97    0.84
  -7   3  -2    2.44    0.45
   7  -3   2    1.89    0.53
   7  -3   2    1.80    0.43
  -8   3  -2    1.72    0.46
   8  -3   2    2.91    0.52
   8  -3   2    0.75    0.47
  -9   3  -2    1.55    0.51
   9  -3   2    1.80    0.59
   9  -3   2    1.32    0.46
 -10   3  -2    3.96    0.64
  10  -3   2    3.18    0.62
  10  -3   2    2.84    0.68
  11  -3   2    6.17    0.81
  11  -3   2    5.97    0.89
  12   2  -2    1.65    0.62
 -12  -2   2    1.94    0.66
  11   2  -2    5.56    0.77
  11   2  -2    5.55    0.77
 -11  -2   2    5.39    0.77
  10   2  -2    6.09    0.80
  10   2  -2    6.27    0.71
 -10  -2   2    3.84    0.64
   9   2  -2   10.83    0.77
   9   2  -2   10.13    0.88
  -9  -2   2    8.96    0.82
   8   2  -2   23.29    0.99
   8   2  -2   24.78    1.13
  -8  -2   2   21.82    1.07
   7   2  -2   38.61    1.35
   7   2  -2   39.15    1.21
  -7  -2   2   39.25    1.32
   6   2  -2    0.35    0.35
   6   2  -2   -0.42    0.23
  -6  -2   2    0.28    0.34
   5   2  -2    4.35    0.48
   5   2  -2    3.63    0.36
  -5  -2   2    3.83    0.46
   4   2  -2   47.34    1.28
   4   2  -2   47.69    1.12
  -4  -2   2   46.30    1.28
   3   2  -2    0.43    0.18
   3   2  -2    0.53    0.27
  -3  -2   2    1.13    0.31
   2   2  -2   42.63    1.09
  -2  -2   2   41.43    1.05
   1   2  -2    0.40    0.24
  -1  -2   2    0.21    0.23
   0  -2   2   39.23    0.91
   0  -2   2   39.63    0.87
   1  -2   2    4.86    0.33
   1  -2   2    5.05    0.33
   1  -2   2    4.29    0.33
  -2   2  -2   10.38    0.48
   2  -2   2   10.23    0.55
   2  -2   2   10.76    0.53
  -3   2  -2   10.91    0.49
   3  -2   2   10.99    0.57
   3  -2   2   10.06    0.66
  -4   2  -2   74.44    1.65
   4  -2   2   72.08    1.73
   4  -2   2   71.68    1.85
  -5   2  -2    4.95    0.44
   5  -2   2    5.01    0.53
   5  -2   2    5.10    0.48
  -6   2  -2    1.21    0.33
   6  -2   2    0.87    0.39
   6  -2   2    0.26    0.32
  -7   2  -2   19.89    0.89
   7  -2   2   19.36    0.91
   7  -2   2   20.43    1.02
  -8   2  -2    1.60    0.46
   8  -2   2    1.20    0.46
   8  -2   2    2.18    0.58
  -9   2  -2    7.56    0.72
   9  -2   2    7.27    0.83
   9  -2   2    6.90    0.75
 -10   2  -2    0.32    0.46
  10  -2   2    0.00    0.47
  10  -2   2    0.97    0.63
  11  -2   2    6.20    0.93
  11  -2   2    4.73    0.75
  12  -2   2    4.44    0.89
  12   1  -2   12.25    1.09
 -12  -1   2   10.73    1.07
  11   1  -2    3.62    0.69
  11   1  -2    2.96    0.71
 -11  -1   2    2.48    0.63
  10   1  -2    8.68    0.86
  10   1  -2    6.55    0.75
 -10  -1   2    5.64    0.74
   9   1  -2   26.27    1.17
   9   1  -2   25.53    1.20
  -9  -1   2   25.53    1.20
   8   1  -2   41.53    1.44
   8   1  -2   39.90    1.36
  -8  -1   2   41.50    1.45
   7   1  -2   14.23    0.76
   7   1  -2   16.68    0.88
  -7  -1   2   14.71    0.85
   6   1  -2   62.72    1.70
   6   1  -2   61.20    1.61
  -6  -1   2   63.43    1.70
   5   1  -2   23.55    0.91
   5   1  -2   22.00    0.79
  -5  -1   2   22.79    0.86
   4   1  -2   10.43    0.52
   4   1  -2   10.53    0.62
  -4  -1   2   10.06    0.62
   3   1  -2    6.91    0.41
   3   1  -2    7.42    0.48
  -3  -1   2    7.87    0.51
   2   1  -2    1.87    0.27
   2   1  -2    2.09    0.20
  -2  -1   2    2.17    0.29
   1   1  -2  118.00    2.30
  -1  -1   2  113.77    2.27
   0   1  -2  499.38    9.62
   0  -1   2  517.15    9.47
   0  -1   2  540.67    9.65
   1  -1   2    1.30    0.22
   1  -1   2    1.41    0.21
   1  -1   2    1.19    0.16
  -2   1  -2   13.60    0.46
   2  -1   2   13.71    0.53
  -3   1  -2   88.10    1.82
   3  -1   2   87.74    2.01
   3  -1   2   88.84    1.95
  -4   1  -2  166.68    3.26
   4  -1   2  164.30    3.40
   4  -1   2  161.61    3.47
  -5   1  -2   14.31    0.63
   5  -1   2   14.67    0.80
   5  -1   2   14.79    0.73
  -6   1  -2   23.84    0.88
   6  -1   2   26.11    1.00
   6  -1   2   26.00    1.08
  -7   1  -2    9.19    0.65
   7  -1   2    7.68    0.73
   7  -1   2    8.40    0.68
  -8   1  -2   14.52    0.79
   8  -1   2   14.72    0.90
   8  -1   2   13.73    0.97
  -9   1  -2   15.79    0.90
   9  -1   2   16.85    0.99
   9  -1   2   14.44    1.03
 -10   1  -2    0.63    0.45
  10  -1   2   -0.34    0.47
  10  -1   2   -0.16    0.49
  11  -1   2    8.17    0.89
  11  -1   2    7.55    0.95
  12  -1   2   35.60    1.74
  12  -1   2   35.38    1.60
  12   0  -2    1.19    0.62
  12   0  -2    0.73    0.57
 -12   0   2   -0.82    0.54
  11   0  -2    6.61    0.82
  11   0  -2    7.41    0.88
 -11   0   2    7.88    0.88
  10   0  -2    3.04    0.63
  10   0  -2    2.55    0.60
 -10   0   2    2.45    0.61
   9   0  -2   -0.19    0.41
   9   0  -2   -0.04    0.42
  -9   0   2    0.31    0.45
   8   0  -2    8.36    0.74
   8   0  -2    8.15    0.71
  -8   0   2   10.36    0.82
   7   0  -2   25.04    1.02
   7   0  -2   24.97    1.03
  -7   0   2   25.88    1.08
   6   0  -2    0.13    0.29
   6   0  -2    0.30    0.32
  -6   0   2    0.32    0.33
   5   0  -2    0.93    0.31
   5   0  -2    0.88    0.31
  -5   0   2    0.86    0.34
   4   0  -2   30.63    0.92
   4   0  -2   31.55    0.95
  -4   0   2   31.02    1.01
   3   0  -2   43.79    1.08
   3   0  -2   43.71    1.11
  -3   0   2   44.28    1.17
   2   0  -2   52.80    1.15
   2   0  -2   53.55    1.18
  -2   0   2   51.08    1.21
   1   0  -2  151.49    2.84
   1   0  -2  152.67    2.87
  -1   0   2  143.07    2.85
   0   0  -2    0.21    0.13
   0   0   2    0.19    0.13
  -1   0  -2  138.53    2.68
   1   0   2  135.06    2.67
  -2   0  -2    1.67    0.17
   2   0   2    1.47    0.26
   2   0   2    1.47    0.27
  -3   0  -2    5.14    0.31
   3   0   2    5.73    0.46
   3   0   2    5.80    0.42
  -4   0  -2   84.22    1.80
   4   0   2   84.26    1.98
   4   0   2   85.18    1.97
  -5   0  -2   47.24    1.20
   5   0   2   46.38    1.37
   5   0   2   44.69    1.31
  -6   0  -2    5.72    0.47
  -7   0  -2   12.47    0.73
   7   0   2   12.36    0.83
   7   0   2   12.67    0.80
  -8   0  -2    0.54    0.37
   8   0   2    0.19    0.46
   8   0   2    0.30    0.43
  -9   0  -2   17.79    0.92
   9   0   2   12.99    0.93
   9   0   2   15.78    0.95
 -10   0  -2    5.59    0.65
  10   0   2    6.22    0.81
  10   0   2    3.30    0.66
  11   0   2    2.01    0.62
  11   0   2    1.77    0.65
 -12   0  -2    2.01    0.73
  12   0   2    1.89    0.63
  12  -1  -2   27.46    1.46
 -12   1   2   25.78    1.41
  11  -1  -2    3.44    0.67
  11  -1  -2    4.17    0.75
 -11   1   2    4.05    0.73
  10  -1  -2    5.25    0.76
  10  -1  -2    6.29    0.76
 -10   1   2    7.89    0.83
   9  -1  -2    4.70    0.67
   9  -1  -2    5.10    0.65
  -9   1   2    5.74    0.71
   8  -1  -2   18.47    0.97
   8  -1  -2   20.19    1.04
  -8   1   2   20.12    1.05
   7  -1  -2    3.33    0.47
   7  -1  -2    4.23    0.55
   6  -1  -2   13.12    0.75
   6  -1  -2   13.48    0.69
  -6   1   2   14.59    0.81
   5  -1  -2    1.52    0.32
   5  -1  -2    1.47    0.36
  -5   1   2    2.18    0.39
   4  -1  -2   34.87    1.05
   4  -1  -2   35.07    1.00
  -4   1   2   35.45    1.05
   3  -1  -2   38.17    1.03
   3  -1  -2   35.87    0.95
  -3   1   2   36.46    1.02
   2  -1  -2  179.24    3.50
   2  -1  -2  175.68    3.42
  -2   1   2  178.74    3.48
   1  -1  -2   15.00    0.48
   0  -1  -2  480.88    8.66
   0   1   2  448.03    8.47
  -1  -1  -2   14.82    0.50
  -2  -1  -2    0.31    0.23
   2   1   2    0.10    0.22
  -3  -1  -2    1.04    0.22
   3   1   2    0.95    0.29
   3   1   2    0.95    0.29
  -4  -1  -2    0.52    0.23
   4   1   2    0.33    0.30
   4   1   2    0.50    0.28
  -5  -1  -2    0.48    0.25
   5   1   2    0.37    0.32
   5   1   2    0.90    0.34
  -6  -1  -2   42.15    1.15
   6   1   2   42.15    1.35
   6   1   2   42.23    1.31
  -7  -1  -2   14.81    0.74
   7   1   2   14.26    0.84
   7   1   2   16.30    0.92
  -8  -1  -2    0.61    0.34
   8   1   2    0.78    0.45
   8   1   2    1.12    0.46
  -9  -1  -2   20.47    0.96
   9   1   2   18.78    1.09
   9   1   2   17.29    1.01
 -10  -1  -2    5.01    0.62
  10   1   2    5.32    0.75
  10   1   2    5.34    0.74
 -11  -1  -2    0.71    0.53
  11   1   2    1.70    0.59
 -12  -1  -2    2.54    0.70
  12   1   2    0.70    0.57
  12  -2  -2    3.29    0.79
 -12   2   2    2.43    0.67
  11  -2  -2   10.27    1.05
 -11   2   2    8.72    0.95
  10  -2  -2    0.76    0.49
  10  -2  -2    1.18    0.59
 -10   2   2    1.28    0.55
   9  -2  -2    1.05    0.53
   9  -2  -2    1.82    0.51
  -9   2   2    1.69    0.56
   8  -2  -2   35.23    1.25
   8  -2  -2   33.18    1.33
  -8   2   2   34.29    1.37
   7  -2  -2    8.42    0.64
   7  -2  -2    7.57    0.70
  -7   2   2    7.85    0.73
   6  -2  -2   16.75    0.73
   6  -2  -2   16.27    0.87
  -6   2   2   17.68    0.90
   5  -2  -2    2.30    0.35
   5  -2  -2    2.60    0.42
  -5   2   2    2.40    0.43
   4  -2  -2    3.33    0.33
   4  -2  -2    2.96    0.41
  -4   2   2    3.34    0.43
   3  -2  -2    0.08    0.26
   3  -2  -2    0.25    0.21
  -3   2   2    0.66    0.29
   2  -2  -2   75.59    1.69
   2  -2  -2   74.41    1.51
  -2   2   2   75.31    1.68
   1  -2  -2   15.59    0.57
  -1   2   2   14.65    0.52
   0  -2  -2   21.64    0.59
   0   2   2   20.73    0.55
  -1  -2  -2   33.25    0.72
  -1  -2  -2   32.32    0.80
   1   2   2   32.62    0.80
  -2  -2  -2  152.15    3.05
  -2  -2  -2  154.81    2.90
  -3  -2  -2   29.95    0.91
  -3  -2  -2   29.89    0.76
   3   2   2   29.91    0.91
  -4  -2  -2   11.12    0.50
  -4  -2  -2   11.46    0.64
   4   2   2    9.84    0.66
  -5  -2  -2    1.58    0.33
  -5  -2  -2    2.17    0.32
   5   2   2    2.63    0.43
  -6  -2  -2    2.95    0.37
   6   2   2    3.49    0.46
   6   2   2    3.09    0.49
  -7  -2  -2   54.67    1.48
   7   2   2   55.94    1.64
   7   2   2   58.70    1.71
  -8  -2  -2    0.14    0.38
  -8  -2  -2    0.57    0.34
   8   2   2    0.20    0.43
  -9  -2  -2   44.45    1.56
  -9  -2  -2   44.80    1.44
   9   2   2   44.92    1.61
 -10  -2  -2   20.38    0.98
 -10  -2  -2   21.56    1.14
  10   2   2   23.33    1.26
 -11  -2  -2    4.62    0.73
  11   2   2    5.05    0.79
 -12  -2  -2    1.02    0.62
  12   2   2    0.27    0.55
  11  -3  -2    0.66    0.61
 -11   3   2    0.12    0.54
  10  -3  -2    5.69    0.82
 -10   3   2    5.90    0.80
   9  -3  -2    3.16    0.55
   9  -3  -2    2.31    0.65
  -9   3   2    3.23    0.62
   8  -3  -2    2.77    0.52
   8  -3  -2    2.99    0.51
  -8   3   2    4.50    0.64
   7  -3  -2   12.54    0.82
   7  -3  -2   11.22    0.67
  -7   3   2   12.19    0.88
   6  -3  -2   10.23    0.63
   6  -3  -2   10.48    0.73
  -6   3   2   12.14    0.74
   5  -3  -2    2.02    0.40
   5  -3  -2    1.88    0.32
  -5   3   2    1.82    0.41
   4  -3  -2   59.15    1.55
   4  -3  -2   55.87    1.32
  -4   3   2   54.70    1.48
   3  -3  -2   36.55    1.13
   3  -3  -2   36.78    0.88
  -3   3   2   38.39    1.09
   2  -3  -2   -0.16    0.26
  -2   3   2    0.28    0.27
   1  -3  -2  324.19    6.29
  -1   3   2  332.58    6.18
   0  -3  -2  140.21    2.83
   0   3   2  144.12    2.78
  -1  -3  -2    5.12    0.34
  -1  -3  -2    4.78    0.33
   1   3   2    4.93    0.31
  -2  -3  -2  117.76    2.41
  -2  -3  -2  115.76    2.32
   2   3   2  121.98    2.46
  -3  -3  -2    0.19    0.20
  -3  -3  -2    0.04    0.25
   3   3   2    0.59    0.31
  -4  -3  -2    2.46    0.30
  -4  -3  -2    1.96    0.34
   4   3   2    2.13    0.37
  -5  -3  -2    1.21    0.32
  -5  -3  -2    1.55    0.31
   5   3   2    1.56    0.39
  -6  -3  -2   34.99    1.15
  -6  -3  -2   35.79    1.06
   6   3   2   36.59    1.22
  -7  -3  -2    3.15    0.43
  -7  -3  -2    2.67    0.44
   7   3   2    1.91    0.49
  -8  -3  -2   18.61    0.97
  -8  -3  -2   19.98    0.88
   8   3   2   20.02    1.09
  -9  -3  -2    3.38    0.52
  -9  -3  -2    1.83    0.52
   9   3   2    3.49    0.61
 -10  -3  -2    0.00    0.42
 -10  -3  -2    0.52    0.45
  10   3   2    0.46    0.50
 -11  -3  -2   11.56    1.00
  11   3   2    8.33    0.96
 -12  -3  -2    3.24    0.69
  12   3   2    1.95    0.71
  11  -4  -2   -0.20    0.59
 -11   4   2    0.45    0.59
  10  -4  -2    9.45    1.00
 -10   4   2    6.59    0.85
   9  -4  -2    3.38    0.68
  -9   4   2    2.32    0.60
   8  -4  -2    6.35    0.77
   8  -4  -2    8.20    0.66
  -8   4   2    7.39    0.77
   7  -4  -2   24.25    0.92
   7  -4  -2   23.57    1.16
  -7   4   2   23.15    1.12
   6  -4  -2    0.37    0.36
   6  -4  -2    0.53    0.27
  -6   4   2    0.23    0.35
   5  -4  -2   22.17    0.75
   5  -4  -2   21.20    0.95
  -5   4   2   21.78    0.96
   4  -4  -2   16.47    0.58
   4  -4  -2   17.46    0.86
  -4   4   2   17.55    0.82
   3  -4  -2   30.80    0.74
   3  -4  -2   30.27    1.01
  -3   4   2   29.43    0.96
   2  -4  -2    2.56    0.38
  -2   4   2    1.28    0.31
   1  -4  -2  130.01    2.73
  -1   4   2  129.66    2.67
   0  -4  -2  846.22   15.16
   0  -4  -2  850.15   14.90
   0   4   2  737.42   14.94
  -1  -4  -2  538.22    9.95
  -1  -4  -2  534.84   10.13
   1   4   2  544.31   10.07
  -2  -4  -2    0.22    0.24
  -2  -4  -2    0.31    0.24
   2   4   2    0.02    0.28
  -3  -4  -2   34.23    0.95
  -3  -4  -2   35.70    0.92
   3   4   2   34.27    1.02
  -4  -4  -2   27.05    0.80
  -4  -4  -2   25.94    0.84
   4   4   2   25.28    0.92
  -5  -4  -2   11.33    0.62
  -5  -4  -2   11.43    0.56
   5   4   2   11.64    0.74
  -6  -4  -2    1.39    0.32
  -6  -4  -2    1.48    0.35
   6   4   2    1.15    0.39
  -7  -4  -2   63.05    1.62
  -7  -4  -2   62.15    1.71
   7   4   2   63.39    1.87
  -8  -4  -2   24.45    1.05
  -8  -4  -2   26.18    1.02
   8   4   2   24.62    1.20
  -9  -4  -2    1.35    0.45
  -9  -4  -2    0.89    0.41
   9   4   2    1.00    0.51
 -10  -4  -2   21.52    1.14
 -10  -4  -2   20.18    1.02
  10   4   2   17.58    1.13
 -11  -4  -2    1.65    0.62
  11   4   2    1.61    0.62
 -12  -4  -2    0.59    0.54
  12   4   2   -0.51    0.50
  11  -5  -2    0.08    0.55
 -11   5   2    0.87    0.59
  10  -5  -2   -0.40    0.52
 -10   5   2    0.26    0.55
   9  -5  -2    1.63    0.64
  -9   5   2    1.90    0.59
   8  -5  -2    3.86    0.66
  -8   5   2    3.44    0.64
   7  -5  -2    1.75    0.36
   7  -5  -2    0.66    0.42
  -7   5   2    1.34    0.46
   6  -5  -2   22.05    0.79
   6  -5  -2   21.51    1.08
  -6   5   2   20.89    0.99
   5  -5  -2    8.64    0.72
   5  -5  -2    8.89    0.50
  -5   5   2    8.05    0.67
   4  -5  -2   22.08    0.95
   4  -5  -2   23.13    0.67
  -4   5   2   22.44    0.96
   3  -5  -2    7.90    0.59
   3  -5  -2    8.09    0.35
  -3   5   2    7.62    0.57
   2  -5  -2   22.76    0.85
  -2   5   2   22.26    0.84
   1  -5  -2    2.46    0.38
  -1   5   2    2.70    0.39
   0  -5  -2  306.60    5.86
   0  -5  -2  308.51    5.95
   0   5   2  304.64    5.75
  -1  -5  -2    0.70    0.28
  -1  -5  -2    0.30    0.25
   1   5   2   -0.18    0.21
  -2  -5  -2   17.90    0.67
  -2  -5  -2   17.71    0.65
   2   5   2   16.33    0.70
  -3  -5  -2   99.35    2.10
  -3  -5  -2   97.51    2.10
   3   5   2   97.67    2.22
  -4  -5  -2    3.70    0.38
  -4  -5  -2    3.41    0.37
   4   5   2    3.30    0.45
  -5  -5  -2    3.64    0.39
  -5  -5  -2    2.72    0.37
   5   5   2    3.45    0.49
  -6  -5  -2   23.95    0.85
  -6  -5  -2   23.96    0.88
   6   5   2   22.31    1.03
  -7  -5  -2    9.43    0.65
  -7  -5  -2   12.43    0.73
   7   5   2   10.65    0.84
  -8  -5  -2   14.13    0.80
  -8  -5  -2   15.37    0.86
   8   5   2   16.18    1.02
  -9  -5  -2   58.33    1.79
  -9  -5  -2   58.33    1.69
   9   5   2   61.75    2.02
 -10  -5  -2    3.13    0.55
 -10  -5  -2    3.91    0.63
  10   5   2    1.64    0.63
 -11  -5  -2   -0.46    0.45
  11   5   2   -0.03    0.57
  12   5   2   -0.24    0.58
  11  -6  -2    6.10    0.93
 -11   6   2    4.14    0.83
  10  -6  -2   24.96    1.40
 -10   6   2   23.10    1.33
   9  -6  -2    0.99    0.63
  -9   6   2    2.05    0.63
   8  -6  -2    5.13    0.74
  -8   6   2    6.12    0.76
   7  -6  -2   65.25    2.05
  -7   6   2   64.79    2.00
   6  -6  -2    0.50    0.27
   6  -6  -2    0.14    0.43
  -6   6   2    0.32    0.41
   5  -6  -2    9.55    0.77
   5  -6  -2   10.16    0.49
  -5   6   2    8.45    0.70
   4  -6  -2   28.42    0.73
   4  -6  -2   26.03    1.07
  -4   6   2   27.64    1.04
   3  -6  -2  106.57    2.52
   3  -6  -2  105.60    2.07
  -3   6   2  107.63    2.46
   2  -6  -2    1.69    0.39
  -2   6   2    1.57    0.35
   1  -6  -2   32.13    1.03
  -1   6   2   30.04    0.99
   0  -6  -2  305.52    5.86
   0  -6  -2  298.82    5.92
   0   6   2  302.39    5.70
  -1  -6  -2    1.55    0.33
  -1  -6  -2    1.84    0.33
   1   6   2    1.76    0.27
  -2  -6  -2   59.09    1.44
  -2  -6  -2   60.88    1.43
   2   6   2   60.22    1.46
  -3  -6  -2   75.19    1.71
  -3  -6  -2   72.28    1.67
   3   6   2   72.16    1.79
  -4  -6  -2   12.10    0.63
  -4  -6  -2   11.87    0.61
   4   6   2   12.65    0.70
  -5  -6  -2    0.09    0.28
  -5  -6  -2   -0.32    0.23
   5   6   2    0.12    0.31
  -6  -6  -2    5.24    0.48
  -6  -6  -2    5.08    0.51
   6   6   2    4.85    0.57
  -7  -6  -2    0.27    0.30
  -7  -6  -2    0.67    0.33
   7   6   2    0.32    0.38
  -8  -6  -2    7.75    0.65
  -8  -6  -2    7.73    0.67
   8   6   2    8.24    0.83
  -9  -6  -2   34.81    1.24
  -9  -6  -2   36.57    1.34
   9   6   2   34.93    1.51
 -10  -6  -2    1.02    0.49
 -10  -6  -2    1.47    0.47
  10   6   2    1.10    0.55
 -11  -6  -2    1.29    0.54
  11   6   2    1.15    0.62
  12   6   2    5.32    0.91
  10  -7  -2    1.33    0.69
 -10   7   2    1.07    0.65
   9  -7  -2    1.03    0.60
  -9   7   2   -0.12    0.51
   8  -7  -2    9.41    0.98
  -8   7   2    9.50    0.91
   7  -7  -2    0.74    0.47
  -7   7   2    0.67    0.47
   6  -7  -2   70.65    2.15
  -6   7   2   70.62    2.06
   5  -7  -2    5.62    0.68
   5  -7  -2    5.93    0.42
  -5   7   2    6.76    0.66
   4  -7  -2    6.20    0.65
   4  -7  -2    5.84    0.33
  -4   7   2    6.02    0.60
   3  -7  -2   73.52    1.47
  -3   7   2   73.52    1.90
   2  -7  -2   24.52    0.96
  -2   7   2   26.37    1.01
   1  -7  -2   59.81    1.59
  -1   7   2   61.76    1.60
  -1   7   2   61.86    1.26
   0  -7  -2  368.97    7.32
   0  -7  -2  383.17    7.27
   0   7   2  376.23    7.08
  -1  -7  -2   15.80    0.70
  -1  -7  -2   15.62    0.70
   1   7   2   16.59    0.64
  -2  -7  -2    0.53    0.30
  -2  -7  -2    0.21    0.26
   2   7   2   -0.42    0.25
  -3  -7  -2    8.95    0.59
  -3  -7  -2    8.76    0.52
   3   7   2    8.54    0.58
  -4  -7  -2  119.93    2.62
  -4  -7  -2  118.57    2.56
   4   7   2  119.21    2.73
  -5  -7  -2   20.55    0.79
  -5  -7  -2   20.64    0.85
   5   7   2   22.12    1.00
  -6  -7  -2   23.19    0.95
  -6  -7  -2   24.41    0.89
  -7  -7  -2   18.90    0.87
  -7  -7  -2   17.90    0.80
   7   7   2   19.81    1.07
  -8  -7  -2    7.63    0.67
  -8  -7  -2    7.63    0.64
   8   7   2    7.95    0.80
  -9  -7  -2   15.46    0.92
  -9  -7  -2   14.39    0.93
   9   7   2   14.03    1.10
 -10  -7  -2    2.72    0.54
 -10  -7  -2    2.99    0.56
  10   7   2    3.24    0.71
  11   7   2    0.74    0.62
  12   7   2   16.76    1.35
  10  -8  -2    2.15    0.74
 -10   8   2    2.38    0.69
   9  -8  -2    4.74    0.83
  -9   8   2    2.19    0.67
   8  -8  -2    0.26    0.54
  -8   8   2   -0.25    0.49
   7  -8  -2    5.02    0.72
  -7   8   2    3.54    0.67
   6  -8  -2    1.95    0.55
  -6   8   2    2.58    0.59
   5  -8  -2    0.41    0.39
  -5   8   2    0.03    0.38
   4  -8  -2    3.64    0.24
   4  -8  -2    2.92    0.55
  -4   8   2    4.27    0.58
   3  -8  -2    6.60    0.63
   3  -8  -2    6.97    0.28
  -3   8   2    6.02    0.60
   2  -8  -2    8.17    0.64
  -2   8   2    8.23    0.31
  -2   8   2    8.30    0.66
   1  -8  -2    7.90    0.63
  -1   8   2    7.65    0.60
  -1   8   2    7.98    0.37
   0  -8  -2    3.41    0.43
   0  -8  -2    4.56    0.51
   0   8   2    3.89    0.32
  -1  -8  -2   56.95    1.54
  -1  -8  -2   57.47    1.48
   1   8   2   55.49    1.36
  -2  -8  -2   20.22    0.85
  -2  -8  -2   21.06    0.78
   2   8   2   21.36    0.80
  -3  -8  -2   59.92    1.59
  -3  -8  -2   60.14    1.49
   3   8   2   61.00    1.60
  -4  -8  -2    0.30    0.31
  -4  -8  -2    0.31    0.27
   4   8   2    0.21    0.34
  -5  -8  -2    1.23    0.34
  -5  -8  -2    1.25    0.30
   5   8   2    0.98    0.42
  -6  -8  -2    2.18    0.44
  -6  -8  -2    1.69    0.34
   6   8   2    2.20    0.48
  -7  -8  -2    8.25    0.67
  -7  -8  -2    8.79    0.62
   7   8   2    9.48    0.83
  -8  -8  -2    1.51    0.45
  -8  -8  -2    1.09    0.39
   8   8   2    1.09    0.48
  -9  -8  -2   10.81    0.77
  -9  -8  -2   10.39    0.82
   9   8   2    8.60    0.91
 -10  -8  -2    2.09    0.56
  10   8   2    2.37    0.67
 -11  -8  -2    7.71    0.79
  11   8   2    8.56    1.03
  12   8   2   10.41    1.14
  10  -9  -2   -0.63    0.49
 -10   9   2   -0.75    0.52
   9  -9  -2   -0.61    0.52
  -9   9   2    0.95    0.55
   8  -9  -2   13.37    1.15
  -8   9   2    9.28    0.98
   7  -9  -2    2.89    0.68
  -7   9   2    3.42    0.67
   6  -9  -2    8.55    0.88
  -6   9   2    9.25    0.88
   5  -9  -2   15.67    0.97
  -5   9   2   14.82    0.92
   4  -9  -2   45.63    1.57
  -4   9   2   44.96    1.51
   3  -9  -2   14.67    0.93
  -3   9   2   16.51    0.45
  -3   9   2   14.65    0.85
   2  -9  -2    0.78    0.40
  -2   9   2    1.15    0.17
  -2   9   2    1.38    0.44
   1  -9  -2   80.39    2.05
  -1   9   2   80.18    1.67
  -1   9   2   78.79    2.04
   0  -9  -2  480.39    9.29
   0  -9  -2  477.67    9.38
   0   9   2  485.77    9.08
  -1  -9  -2    4.62    0.50
  -1  -9  -2    4.01    0.44
   1   9   2    5.68    0.42
  -2  -9  -2   31.06    1.07
  -2  -9  -2   31.93    1.03
   2   9   2   30.07    0.99
  -3  -9  -2   62.33    1.67
  -3  -9  -2   62.84    1.58
   3   9   2   64.05    1.66
  -4  -9  -2    3.05    0.38
  -4  -9  -2    2.73    0.44
   4   9   2    3.31    0.47
  -5  -9  -2    0.15    0.34
  -5  -9  -2    0.34    0.26
   5   9   2   -0.04    0.33
  -6  -9  -2   22.50    0.86
  -6  -9  -2   22.03    0.98
   6   9   2   22.12    1.10
  -7  -9  -2   26.17    1.10
  -7  -9  -2   27.37    0.98
   7   9   2   27.47    1.24
  -8  -9  -2    8.93    0.77
  -8  -9  -2    9.82    0.69
   8   9   2    9.15    0.88
  -9  -9  -2    7.53    0.74
   9   9   2    7.35    0.87
 -10  -9  -2    2.07    0.54
  10   9   2    0.49    0.55
 -11  -9  -2    2.49    0.57
  11   9   2    2.11    0.68
  12   9   2   17.88    1.45
   9 -10  -2    3.43    0.85
  -9  10   2    5.55    0.85
   8 -10  -2    4.55    0.83
  -8  10   2    5.08    0.76
   7 -10  -2    7.82    0.95
  -7  10   2    8.19    0.88
   6 -10  -2    0.59    0.53
  -6  10   2    1.25    0.49
   5 -10  -2    2.68    0.62
  -5  10   2    2.97    0.59
   4 -10  -2    0.47    0.42
  -4  10   2    0.48    0.42
   3 -10  -2    6.39    0.69
  -3  10   2    5.96    0.67
   2 -10  -2   12.73    0.85
  -2  10   2   13.52    0.83
  -2  10   2   13.97    0.46
   1 -10  -2    1.47    0.43
  -1  10   2    1.38    0.41
  -1  10   2    1.25    0.22
   0 -10  -2   52.76    1.58
   0 -10  -2   51.56    1.51
   0  10   2   54.61    1.30
  -1 -10  -2  123.22    2.79
  -1 -10  -2  121.89    2.85
   1  10   2  123.32    2.64
  -2 -10  -2   -0.17    0.27
  -2 -10  -2   -0.03    0.32
   2  10   2    0.09    0.27
  -3 -10  -2    3.21    0.50
  -3 -10  -2    3.13    0.40
   3  10   2    3.44    0.47
  -4 -10  -2   30.64    1.01
  -4 -10  -2   30.92    1.12
   4  10   2   28.90    1.15
  -5 -10  -2    1.27    0.34
  -5 -10  -2    0.86    0.36
   5  10   2    0.93    0.43
  -6 -10  -2    3.28    0.48
  -6 -10  -2    2.86    0.40
   6  10   2    2.36    0.56
  -7 -10  -2   21.97    1.05
  -7 -10  -2   21.52    0.89
   7  10   2   22.76    1.21
  -8 -10  -2    7.68    0.75
  -8 -10  -2    7.97    0.62
   8  10   2    7.44    0.84
  -9 -10  -2    6.76    0.74
   9  10   2    6.75    0.84
 -10 -10  -2    2.20    0.55
  10  10   2    1.37    0.67
 -11 -10  -2    2.04    0.58
  11  10   2    1.45    0.63
  12  10   2    4.10    0.85
   9 -11  -2    0.40    0.68
  -9  11   2    0.03    0.57
   8 -11  -2   11.57    1.16
  -8  11   2    7.23    0.91
   7 -11  -2    0.80    0.60
  -7  11   2    1.54    0.58
   6 -11  -2   10.79    1.01
  -6  11   2   12.39    1.03
   5 -11  -2    2.10    0.63
  -5  11   2    1.47    0.61
   4 -11  -2    6.58    0.77
  -4  11   2    6.23    0.71
   3 -11  -2   14.24    1.01
  -3  11   2   13.18    0.88
   2 -11  -2    0.32    0.40
  -2  11   2    1.17    0.45
   1 -11  -2   11.02    0.74
  -1  11   2   12.70    0.88
  -1  11   2   11.50    0.50
   0 -11  -2  255.63    5.31
   0 -11  -2  249.23    5.31
   0  11   2  254.94    4.99
  -1 -11  -2    2.83    0.51
  -1 -11  -2    3.40    0.47
   1  11   2    2.91    0.37
  -2 -11  -2    9.06    0.65
  -2 -11  -2    8.36    0.72
   2  11   2    8.83    0.62
  -3 -11  -2   35.85    1.25
  -3 -11  -2   35.71    1.14
   3  11   2   36.03    1.21
  -4 -11  -2    7.13    0.54
  -4 -11  -2    6.08    0.63
   4  11   2    6.72    0.65
  -5 -11  -2    4.93    0.60
  -5 -11  -2    3.85    0.45
   5  11   2    3.63    0.59
  -6 -11  -2   27.56    0.99
  -6 -11  -2   27.77    1.17
   6  11   2   27.26    1.23
  -7 -11  -2   13.64    0.90
  -7 -11  -2   13.98    0.76
   7  11   2   12.77    1.01
  -8 -11  -2    6.33    0.70
   8  11   2    5.86    0.82
  -9 -11  -2    4.90    0.70
   9  11   2    5.45    0.84
 -10 -11  -2    0.04    0.44
  10  11   2   -0.01    0.51
 -11 -11  -2    0.92    0.54
  11  11   2    0.20    0.61
  12  11   2    1.40    0.72
   8 -12  -2    3.88    0.81
  -8  12   2    5.95    0.89
   7 -12  -2   -0.14    0.55
  -7  12   2   -0.18    0.56
   6 -12  -2    0.53    0.55
  -6  12   2    1.28    0.58
   5 -12  -2   -0.71    0.47
  -5  12   2    0.35    0.48
   4 -12  -2    1.91    0.60
  -4  12   2    3.90    0.68
   3 -12  -2    2.53    0.58
  -3  12   2    1.74    0.52
   2 -12  -2    6.79    0.73
  -2  12   2    5.29    0.68
   1 -12  -2    2.65    0.50
  -1  12   2    2.31    0.51
   0 -12  -2   37.29    1.31
   0 -12  -2   37.88    1.41
   0  12   2   36.41    1.06
  -1 -12  -2    8.41    0.67
  -1 -12  -2    8.59    0.76
   1  12   2    8.92    0.60
  -2 -12  -2    9.72    0.68
  -2 -12  -2   11.25    0.78
   2  12   2    9.80    0.67
  -3 -12  -2    9.93    0.81
  -3 -12  -2    7.82    0.62
   3  12   2    9.95    0.72
  -4 -12  -2   21.14    0.90
  -4 -12  -2   22.45    1.03
   4  12   2   22.48    1.06
  -5 -12  -2   12.21    0.90
  -5 -12  -2   13.18    0.72
   5  12   2   12.23    0.93
  -6 -12  -2    2.41    0.44
  -6 -12  -2    3.24    0.59
   6  12   2    2.79    0.60
  -7 -12  -2   19.02    1.08
   7  12   2   21.01    1.16
  -8 -12  -2    5.58    0.72
   8  12   2    5.27    0.78
  -9 -12  -2    3.96    0.66
   9  12   2    4.30    0.76
 -10 -12  -2    1.97    0.57
  10  12   2    0.67    0.55
 -11 -12  -2    3.92    0.73
  11  12   2    4.82    0.92
   8 -13  -2    1.46    0.71
  -8  13   2    1.57    0.67
   7 -13  -2    6.75    1.00
  -7  13   2    4.63    0.81
   6 -13  -2    3.93    0.75
  -6  13   2    3.21    0.71
   5 -13  -2    1.91    0.67
  -5  13   2    2.28    0.64
   4 -13  -2    0.55    0.52
  -4  13   2    0.85    0.58
   3 -13  -2    3.54    0.70
  -3  13   2    3.93    0.70
   2 -13  -2    1.00    0.47
  -2  13   2    1.65    0.52
   1 -13  -2    0.30    0.45
  -1  13   2    0.27    0.46
   0 -13  -2    0.41    0.40
   0 -13  -2   -0.38    0.39
   0  13   2    0.21    0.25
  -1 -13  -2    3.68    0.61
  -1 -13  -2    1.94    0.47
   1  13   2    2.88    0.42
  -2 -13  -2   10.93    0.76
  -2 -13  -2   13.05    0.95
   2  13   2   11.81    0.75
  -3 -13  -2    5.80    0.57
  -3 -13  -2    6.14    0.69
   3  13   2    6.81    0.65
  -4 -13  -2    6.51    0.57
  -4 -13  -2    6.07    0.69
   4  13   2    5.99    0.67
  -5 -13  -2   11.31    0.70
  -5 -13  -2   12.43    0.85
   5  13   2   12.77    0.96
  -6 -13  -2   19.18    1.07
  -6 -13  -2   18.02    0.87
   6  13   2   18.62    1.13
  -7 -13  -2    2.14    0.57
   7  13   2    0.72    0.52
  -8 -13  -2    7.30    0.81
   8  13   2    7.88    0.90
  -9 -13  -2    2.70    0.61
   9  13   2    3.45    0.72
 -10 -13  -2    0.74    0.53
  10  13   2    0.66    0.59
 -11 -13  -2    2.98    0.66
  11  13   2    2.04    0.73
   7 -14  -2    2.56    0.77
  -7  14   2    1.48    0.68
   6 -14  -2    3.40    0.77
  -6  14   2    3.04    0.74
   5 -14  -2   -0.11    0.51
  -5  14   2   -0.17    0.55
   4 -14  -2    4.36    0.72
  -4  14   2    3.06    0.67
   3 -14  -2    9.55    0.95
  -3  14   2   10.19    0.98
   2 -14  -2    0.38    0.46
  -2  14   2    0.23    0.47
   1 -14  -2   12.79    0.97
  -1  14   2   13.38    1.04
   0 -14  -2   -0.28    0.41
   0 -14  -2    0.30    0.44
  -1 -14  -2    0.78    0.47
  -1 -14  -2    1.17    0.45
   1  14   2    1.15    0.35
  -2 -14  -2    5.26    0.59
  -2 -14  -2    5.06    0.73
   2  14   2    5.26    0.59
  -3 -14  -2    9.93    0.73
  -3 -14  -2   11.25    0.93
   3  14   2    9.73    0.77
  -4 -14  -2    5.13    0.71
  -4 -14  -2    4.81    0.59
   4  14   2    5.19    0.65
  -5 -14  -2    1.19    0.51
  -5 -14  -2    0.69    0.37
   5  14   2    0.73    0.52
  -6 -14  -2    3.13    0.64
   6  14   2    4.21    0.67
  -7 -14  -2    3.05    0.63
   7  14   2    3.09    0.66
  -8 -14  -2   -0.60    0.47
   8  14   2    0.82    0.61
  -9 -14  -2    2.62    0.64
   9  14   2    1.42    0.69
 -10 -14  -2    2.53    0.69
  10  14   2    2.95    0.77
 -11 -14  -2   -0.60    0.52
  11  14   2    0.61    0.68
   6 -15  -2    7.28    1.03
  -6  15   2    7.05    0.96
   5 -15  -2    1.44    0.69
  -5  15   2    2.42    0.67
   4 -15  -2    0.22    0.52
  -4  15   2   -0.65    0.49
   3 -15  -2   12.99    1.09
  -3  15   2   12.56    1.11
   2 -15  -2   29.64    1.40
  -2  15   2   28.11    1.41
   1 -15  -2    2.80    0.62
  -1  15   2    3.78    0.68
   0 -15  -2   11.23    0.91
   0 -15  -2    9.88    0.97
  -1 -15  -2    0.27    0.51
  -1 -15  -2    0.44    0.42
  -2 -15  -2    9.95    0.79
  -2 -15  -2    9.77    0.92
   2  15   2    9.14    0.72
  -3 -15  -2   56.41    1.95
  -3 -15  -2   53.39    1.68
   3  15   2   58.65    1.78
  -4 -15  -2    5.68    0.74
  -4 -15  -2    6.89    0.66
   4  15   2    5.77    0.74
  -5 -15  -2    4.95    0.74
   5  15   2    6.24    0.75
  -6 -15  -2    5.07    0.73
   6  15   2    7.87    0.88
  -7 -15  -2    4.32    0.74
   7  15   2    3.60    0.70
  -8 -15  -2    0.08    0.51
   8  15   2    0.05    0.57
  -9 -15  -2    1.35    0.61
   9  15   2    3.22    0.76
 -10 -15  -2    1.29    0.62
  10  15   2    1.13    0.65
   6 -16  -2    3.75    0.82
  -6  16   2    5.00    0.87
   5 -16  -2    3.08    0.77
  -5  16   2    2.97    0.75
   4 -16  -2   11.76    1.11
  -4  16   2    9.53    1.00
   3 -16  -2    4.98    0.79
  -3  16   2    6.42    0.85
   2 -16  -2    1.36    0.58
  -2  16   2    3.68    0.72
   1 -16  -2    0.27    0.54
  -1  16   2    0.45    0.54
   0 -16  -2   18.55    1.10
   0 -16  -2   18.71    1.22
  -1 -16  -2    0.78    0.48
  -1 -16  -2    0.34    0.48
  -2 -16  -2   13.19    0.94
  -2 -16  -2   12.24    1.06
   2  16   2   14.40    0.89
  -3 -16  -2   -0.14    0.39
  -3 -16  -2   -0.02    0.50
   3  16   2    0.53    0.46
  -4 -16  -2    1.71    0.48
  -4 -16  -2    1.81    0.59
   4  16   2    1.70    0.52
  -5 -16  -2    0.38    0.54
   5  16   2    1.18    0.53
  -6 -16  -2    1.95    0.59
   6  16   2    2.12    0.60
  -7 -16  -2    1.30    0.56
   7  16   2    1.21    0.61
  -8 -16  -2   10.65    1.00
   8  16   2   10.45    1.10
  -9 -16  -2    1.43    0.62
   9  16   2    2.07    0.71
 -10 -16  -2   -0.20    0.53
  10  16   2    0.45    0.65
   5 -17  -2    1.47    0.67
  -5  17   2    1.02    0.71
   4 -17  -2    2.56    0.72
  -4  17   2    1.94    0.68
   3 -17  -2    1.70    0.62
  -3  17   2    1.54    0.62
   2 -17  -2    6.64    0.87
  -2  17   2    7.09    0.94
   1 -17  -2    4.88    0.77
  -1  17   2    6.27    0.84
   0 -17  -2    9.76    0.90
   0 -17  -2   10.12    1.06
  -1 -17  -2   -0.03    0.50
  -1 -17  -2   -0.14    0.44
  -2 -17  -2    2.34    0.54
  -2 -17  -2    2.09    0.64
  -3 -17  -2    3.39    0.62
  -3 -17  -2    2.77    0.66
   3  17   2    2.96    0.61
  -4 -17  -2    6.11    0.85
   4  17   2    5.54    0.72
  -5 -17  -2    1.11    0.59
   5  17   2    1.79    0.61
  -6 -17  -2    7.09    0.90
   6  17   2    8.96    0.96
  -7 -17  -2    0.56    0.52
   7  17   2    1.30    0.64
  -8 -17  -2   11.50    1.06
   8  17   2   13.33    1.19
  -9 -17  -2    4.32    0.76
   9  17   2    4.77    0.90
   4 -18  -2   -0.47    0.56
  -4  18   2    0.46    0.60
   3 -18  -2    1.31    0.64
  -3  18   2    2.26    0.66
   2 -18  -2    0.59    0.58
  -2  18   2   -0.82    0.51
   1 -18  -2    0.20    0.56
  -1  18   2    0.56    0.56
   0 -18  -2    7.13    0.86
   0  18   2    4.30    0.83
  -1 -18  -2    9.92    0.93
  -1 -18  -2    9.21    1.03
  -2 -18  -2    0.08    0.53
  -2 -18  -2   -0.75    0.42
  -3 -18  -2    7.78    0.93
  -3 -18  -2    8.98    0.83
  -4 -18  -2    3.02    0.69
   4  18   2    2.68    0.59
  -5 -18  -2    9.92    1.05
   5  18   2   13.89    1.12
  -6 -18  -2    0.85    0.59
   6  18   2    0.89    0.62
  -7 -18  -2    0.70    0.60
   7  18   2    0.39    0.61
  -8 -18  -2    2.17    0.67
   8  18   2    2.68    0.76
   2 -19  -2    1.09    0.66
  -2  19   2    0.39    0.57
   1 -19  -2    1.84    0.65
  -1  19   2    1.59    0.71
   0 -19  -2   23.37    1.28
   0  19   2   20.28    1.32
  -1 -19  -2    6.23    0.78
  -1 -19  -2    3.41    1.15
  -2 -19  -2    6.91    0.95
  -2 -19  -2    7.00    0.81
  -3 -19  -2    6.04    0.93
  -4 -19  -2   11.82    1.19
  -5 -19  -2    2.21    0.69
   5  19   2    3.54    0.72
  -6 -19  -2    5.41    0.88
   6  19   2    7.52    0.95
  -7 -19  -2    6.32    0.95
   7  19   2    4.91    0.86
   1 -20  -2    2.92    0.71
  -1  20   2    5.40    0.88
   0 -20  -2    0.21    0.53
   0  20   2   -0.43    0.57
  -1 -20  -2   18.24    1.49
  -1 -20  -2   16.35    1.13
  -2 -20  -2    7.28    1.02
  -3 -20  -2   -0.11    0.57
  -4 -20  -2    1.99    0.78
  -5 -20  -2   -0.20    0.53
  -6 -20  -2    0.54    0.66
   6  20   2    0.91    0.60
   6  19  -3    0.88    0.67
  -6 -19   3    1.01    0.69
   5  19  -3    4.15    0.81
  -5 -19   3    3.01    0.78
   4  19  -3    1.27    0.64
  -4 -19   3    0.77    0.64
  -3 -19   3    0.21    0.69
  -2 -19   3    5.68    0.94
  -1 -19   3    6.69    1.00
   0 -19   3   -0.77    0.55
   1 -19   3   14.28    1.15
   1 -19   3   12.20    1.30
   7  18  -3    6.93    1.00
  -7 -18   3    6.75    0.98
   6  18  -3   -0.21    0.61
  -6 -18   3    0.43    0.65
   5  18  -3   -0.03    0.57
  -5 -18   3   -0.06    0.58
   4  18  -3   -0.14    0.57
  -4 -18   3    0.65    0.53
   3  18  -3    2.11    0.62
  -3 -18   3    1.85    0.67
  -2 -18   3    0.81    0.63
  -1 -18   3   -0.14    0.66
   0 -18   3    0.55    0.63
   1 -18   3   12.22    1.05
   1 -18   3   13.83    1.24
  -2  18  -3    0.64    0.60
   2 -18   3   -0.08    0.55
  -3  18  -3    0.57    0.55
   3 -18   3    1.51    0.66
   8  17  -3    0.92    0.67
  -8 -17   3    1.29    0.62
   7  17  -3   12.19    1.21
  -7 -17   3   11.04    1.11
   6  17  -3    7.71    0.99
  -6 -17   3    7.93    1.01
   5  17  -3    2.56    0.73
  -5 -17   3    2.09    0.69
   4  17  -3   12.04    1.08
  -4 -17   3   11.23    1.07
   3  17  -3   -0.02    0.51
  -3 -17   3   -0.36    0.57
   2  17  -3    5.83    0.76
  -2 -17   3    5.71    0.88
  -1 -17   3   14.62    1.20
   0 -17   3    1.15    0.55
   0 -17   3    1.76    0.67
   1 -17   3   13.50    1.20
   1 -17   3   14.42    1.02
  -2  17  -3    7.99    0.97
   2 -17   3   11.70    1.07
  -3  17  -3    1.60    0.63
   3 -17   3    1.25    0.57
  -4  17  -3    3.87    0.80
   4 -17   3    4.08    0.89
   9  16  -3   -0.56    0.59
  -9 -16   3   -0.12    0.58
   8  16  -3    0.77    0.66
  -8 -16   3    0.69    0.62
   7  16  -3    7.84    1.03
  -7 -16   3    7.15    0.96
   6  16  -3    0.28    0.53
  -6 -16   3    0.13    0.51
   5  16  -3    4.06    0.78
  -5 -16   3    3.44    0.74
   4  16  -3    9.32    0.92
  -4 -16   3    6.83    0.87
   3  16  -3   -0.21    0.47
  -3 -16   3    1.19    0.54
   2  16  -3    6.94    0.78
  -2 -16   3    6.29    0.87
   1  16  -3    1.11    0.51
  -1 -16   3   -0.27    0.52
  -1 -16   3    0.19    0.37
   0 -16   3    8.13    0.93
   0 -16   3    9.03    0.84
   1 -16   3   10.14    1.05
   1 -16   3    9.09    0.87
  -2  16  -3    6.16    0.83
   2 -16   3    4.19    0.72
   2 -16   3    4.12    0.73
  -3  16  -3    1.01    0.55
   3 -16   3    0.08    0.55
  -4  16  -3   -0.49    0.45
   4 -16   3   -0.59    0.54
  -5  16  -3    4.03    0.76
   5 -16   3    2.11    0.75
  10  15  -3    0.41    0.71
 -10 -15   3   -0.41    0.53
   9  15  -3    3.20    0.79
  -9 -15   3    2.86    0.72
   8  15  -3    1.97    0.73
  -8 -15   3    2.35    0.69
   7  15  -3    0.22    0.56
  -7 -15   3    0.65    0.56
   6  15  -3    9.23    1.00
  -6 -15   3   11.24    1.04
   5  15  -3    0.64    0.58
  -5 -15   3    0.74    0.59
   4  15  -3   14.63    1.11
  -4 -15   3   11.89    1.05
   3  15  -3    2.75    0.63
  -3 -15   3    2.37    0.61
   2  15  -3    0.33    0.44
  -2 -15   3    0.56    0.57
   1  15  -3    0.62    0.44
  -1 -15   3    0.57    0.53
  -1 -15   3    0.83    0.43
   0  15  -3    0.50    0.43
   0 -15   3    0.11    0.40
   0 -15   3   -0.12    0.50
   1 -15   3    0.39    0.45
   1 -15   3    0.71    0.57
   2 -15   3    0.28    0.58
   2 -15   3    0.01    0.47
  -3  15  -3    2.37    0.65
   3 -15   3    2.07    0.62
  -4  15  -3   13.72    1.14
   4 -15   3   14.91    1.23
  -5  15  -3    0.07    0.53
   5 -15   3    0.17    0.60
  -6  15  -3    0.85    0.59
   6 -15   3   -0.70    0.57
  10  14  -3   -0.10    0.68
 -10 -14   3    0.65    0.57
   9  14  -3    1.89    0.69
  -9 -14   3    2.33    0.66
   8  14  -3    5.92    0.89
  -8 -14   3    4.34    0.75
   7  14  -3    0.51    0.56
  -7 -14   3    1.78    0.61
   6  14  -3    0.23    0.51
  -6 -14   3    1.04    0.53
   5  14  -3   22.77    1.28
  -5 -14   3   26.45    1.33
   4  14  -3    2.02    0.58
  -4 -14   3    2.51    0.64
   3  14  -3   -0.06    0.46
  -3 -14   3    0.04    0.45
   2  14  -3    0.09    0.41
  -2 -14   3   -0.32    0.47
  -2 -14   3    0.37    0.35
   1  14  -3    0.10    0.40
  -1 -14   3    0.08    0.37
  -1 -14   3    0.30    0.48
   0  14  -3    2.97    0.54
   0 -14   3    3.25    0.64
   0 -14   3    3.52    0.56
  -1  14  -3    0.47    0.40
   1 -14   3    0.64    0.55
   1 -14   3    0.16    0.44
   2 -14   3    1.35    0.55
   2 -14   3    2.41    0.66
  -3  14  -3   16.21    1.09
   3 -14   3   14.78    1.07
  -4  14  -3    1.16    0.53
   4 -14   3    0.21    0.58
  -5  14  -3    3.88    0.69
   5 -14   3    4.52    0.81
  -6  14  -3   -0.83    0.43
   6 -14   3   -0.37    0.62
  11  13  -3    1.09    0.74
  10  13  -3   12.29    1.26
 -10 -13   3   10.48    1.09
   9  13  -3    0.59    0.62
  -9 -13   3    0.27    0.55
   8  13  -3    6.48    0.93
  -8 -13   3    9.22    1.01
   7  13  -3   15.03    1.20
  -7 -13   3   11.63    1.00
   6  13  -3    3.87    0.66
  -6 -13   3    4.44    0.68
   5  13  -3    0.66    0.53
  -5 -13   3    0.56    0.53
   4  13  -3   58.82    1.89
  -4 -13   3   60.55    1.98
   3  13  -3    1.04    0.50
  -3 -13   3    1.03    0.51
   2  13  -3   -0.30    0.38
  -2 -13   3    0.05    0.30
  -2 -13   3    0.61    0.48
   1  13  -3   14.91    0.89
  -1 -13   3   14.69    0.97
  -1 -13   3   13.40    0.75
   0  13  -3    3.62    0.54
   0 -13   3    3.67    0.54
   0 -13   3    3.61    0.65
  -1  13  -3    1.02    0.44
   1 -13   3    0.84    0.47
   1 -13   3    1.14    0.48
  -2  13  -3    0.74    0.37
   2 -13   3    0.98    0.50
   2 -13   3    0.32    0.52
  -3  13  -3    7.41    0.82
   3 -13   3    4.37    0.70
  -4  13  -3   13.41    1.06
   4 -13   3   10.70    1.02
  -5  13  -3    5.52    0.77
   5 -13   3    5.37    0.86
  -6  13  -3    0.98    0.60
   6 -13   3    1.15    0.65
  -7  13  -3   -0.24    0.49
   7 -13   3   -0.17    0.56
  11  12  -3    0.24    0.63
 -11 -12   3    0.34    0.59
  10  12  -3    1.65    0.71
 -10 -12   3    0.71    0.61
   9  12  -3   26.52    1.44
  -9 -12   3   23.49    1.37
   8  12  -3   31.87    1.59
  -8 -12   3   31.92    1.46
   7  12  -3    0.81    0.50
  -7 -12   3    0.52    0.53
   6  12  -3    3.40    0.65
  -6 -12   3    3.95    0.64
   5  12  -3   40.39    1.54
  -5 -12   3   41.86    1.54
   4  12  -3   10.31    0.88
  -4 -12   3   10.42    0.89
   3  12  -3    9.93    0.81
  -3 -12   3   10.85    0.59
  -3 -12   3   12.39    0.93
   2  12  -3   34.22    1.28
  -2 -12   3   31.56    1.34
  -2 -12   3   33.81    1.07
   1  12  -3    0.74    0.40
  -1 -12   3    0.73    0.34
  -1 -12   3    0.16    0.37
   0  12  -3    6.73    0.63
   0 -12   3    6.98    0.76
   0 -12   3    7.50    0.65
  -1  12  -3   21.00    0.90
   1 -12   3   20.82    1.06
   1 -12   3   21.19    1.01
  -2  12  -3    1.39    0.41
   2 -12   3    1.88    0.50
   2 -12   3    1.48    0.48
  -3  12  -3   13.59    0.96
   3 -12   3   14.03    1.03
   3 -12   3   12.22    0.74
  -4  12  -3   48.69    1.72
   4 -12   3   51.51    1.85
  -5  12  -3    0.19    0.49
   5 -12   3    0.30    0.53
  -6  12  -3   -1.10    0.42
   6 -12   3   -0.45    0.53
  -7  12  -3    3.30    0.71
   7 -12   3    3.81    0.76
  -8  12  -3   -0.81    0.49
   8 -12   3   -0.12    0.64
  11  11  -3    3.64    0.82
 -11 -11   3    3.76    0.77
  10  11  -3   -0.39    0.55
 -10 -11   3    0.16    0.52
   9  11  -3   10.75    1.11
  -9 -11   3   11.32    1.03
   8  11  -3    7.51    0.88
  -8 -11   3    6.78    0.81
   7  11  -3   23.31    1.25
  -7 -11   3   22.16    1.16
   6  11  -3    5.32    0.70
  -6 -11   3    4.54    0.65
   5  11  -3    9.59    0.84
  -5 -11   3   11.20    0.89
   4  11  -3   -0.07    0.42
  -4 -11   3    0.44    0.43
   3  11  -3    0.06    0.39
  -3 -11   3    0.29    0.40
  -3 -11   3    0.19    0.22
   2  11  -3   33.57    1.22
  -2 -11   3   34.98    1.05
  -2 -11   3   34.55    1.30
   1  11  -3   18.10    0.89
  -1 -11   3   16.65    0.97
  -1 -11   3   16.57    0.78
   0  11  -3    0.69    0.36
   0 -11   3   -0.06    0.32
   0 -11   3    0.31    0.39
  -1  11  -3   18.19    0.83
   1 -11   3   17.27    0.90
   1 -11   3   16.92    0.99
   2 -11   3   16.95    0.96
   2 -11   3   17.01    0.80
   2 -11   3   15.96    0.93
  -3  11  -3    6.72    0.73
   3 -11   3    7.33    0.57
   3 -11   3    5.85    0.72
  -4  11  -3   15.65    0.99
   4 -11   3   14.63    1.02
  -5  11  -3    6.94    0.78
   5 -11   3    6.75    0.84
  -6  11  -3    2.66    0.60
   6 -11   3    3.51    0.70
  -7  11  -3    0.92    0.52
   7 -11   3    1.13    0.63
  -8  11  -3   -0.06    0.49
   8 -11   3    1.44    0.72
  11  10  -3   12.02    1.18
 -11 -10   3   10.50    1.01
  10  10  -3    6.59    0.90
 -10 -10   3    5.34    0.81
   9  10  -3    0.28    0.57
  -9 -10   3    0.93    0.56
   8  10  -3   53.37    1.95
  -8 -10   3   52.51    1.85
   7  10  -3    9.99    0.94
  -7 -10   3   12.60    0.98
   6  10  -3    1.97    0.52
  -6 -10   3    1.02    0.45
   5  10  -3    1.25    0.50
  -5 -10   3    1.35    0.44
   4  10  -3    0.42    0.41
  -4 -10   3   -0.11    0.15
  -4 -10   3    0.14    0.35
   3  10  -3   13.75    0.86
  -3 -10   3   13.91    0.54
  -3 -10   3   13.83    0.89
   2  10  -3   41.57    1.35
  -2 -10   3   42.68    1.45
  -2 -10   3   43.09    1.14
   1  10  -3    1.59    0.39
  -1 -10   3    1.57    0.32
  -1 -10   3    0.93    0.38
   0  10  -3    5.32    0.53
   0 -10   3    3.87    0.45
   0 -10   3    4.78    0.56
   1 -10   3   38.29    1.18
   1 -10   3   34.79    1.23
   1 -10   3   36.11    1.33
   2 -10   3    5.90    0.53
   2 -10   3    6.42    0.65
   2 -10   3    6.98    0.68
  -3  10  -3    7.08    0.71
   3 -10   3    6.78    0.55
   3 -10   3    6.06    0.71
  -4  10  -3    8.15    0.78
   4 -10   3    8.37    0.82
   4 -10   3    7.34    0.59
  -5  10  -3   14.92    0.96
   5 -10   3   16.18    1.11
  -6  10  -3    5.36    0.71
   6 -10   3    3.72    0.77
  -7  10  -3    2.25    0.58
   7 -10   3    1.26    0.63
  -8  10  -3    6.34    0.80
   8 -10   3    4.64    0.92
   9 -10   3    6.49    1.02
  12   9  -3    1.37    0.75
 -12  -9   3    1.40    0.63
  11   9  -3    4.63    0.90
  10   9  -3   34.15    1.67
 -10  -9   3   33.55    1.54
   9   9  -3    1.20    0.63
  -9  -9   3    1.70    0.56
   8   9  -3    0.00    0.51
  -8  -9   3    0.41    0.49
   7   9  -3   47.52    1.71
  -7  -9   3   49.95    1.70
   6   9  -3   13.70    0.92
  -6  -9   3   11.93    0.83
   5   9  -3    5.67    0.67
  -5  -9   3    5.64    0.62
   4   9  -3   50.91    1.59
  -4  -9   3   51.80    1.09
  -4  -9   3   50.11    1.57
   3   9  -3    0.15    0.33
  -3  -9   3    0.68    0.37
  -3  -9   3    0.31    0.19
   2   9  -3   12.50    0.73
  -2  -9   3   13.98    0.84
  -2  -9   3   13.39    0.56
   1   9  -3   20.46    0.89
  -1  -9   3   19.22    0.75
  -1  -9   3   21.93    0.97
   0   9  -3   -0.09    0.30
   0  -9   3    0.16    0.27
   0  -9   3    0.16    0.36
   1  -9   3   25.47    0.98
   1  -9   3   26.18    0.92
   1  -9   3   23.30    1.02
   2  -9   3   44.39    1.43
   2  -9   3   41.99    1.37
   2  -9   3   41.98    1.23
  -3   9  -3    2.04    0.47
   3  -9   3    1.76    0.37
   3  -9   3    1.71    0.51
  -4   9  -3    1.04    0.44
   4  -9   3    0.66    0.46
   4  -9   3    1.12    0.35
  -5   9  -3   11.55    0.86
   5  -9   3   13.38    1.06
   5  -9   3   11.77    0.67
  -6   9  -3    5.60    0.71
   6  -9   3    6.18    0.84
  -7   9  -3   19.25    1.08
   7  -9   3   19.63    1.31
  -8   9  -3   10.08    0.92
   8  -9   3    9.57    1.08
   9  -9   3   -0.06    0.68
  12   8  -3    0.68    0.66
 -12  -8   3    0.98    0.57
  11   8  -3   17.62    1.38
 -11  -8   3   16.82    1.11
  10   8  -3    3.04    0.72
 -10  -8   3    3.46    0.66
   9   8  -3   15.23    1.19
  -9  -8   3   15.99    1.02
   8   8  -3    2.84    0.61
  -8  -8   3    4.21    0.66
   7   8  -3   22.42    1.18
  -7  -8   3   17.83    0.99
   6   8  -3   -0.07    0.38
  -6  -8   3    0.75    0.39
   5   8  -3   24.88    1.14
  -5  -8   3   25.97    1.12
   4   8  -3   93.16    2.40
  -4  -8   3  101.82    2.44
   3   8  -3    5.59    0.57
  -3  -8   3    6.05    0.33
  -3  -8   3    6.37    0.59
   2   8  -3   15.35    0.80
  -2  -8   3   12.74    0.72
  -2  -8   3   14.38    0.53
   1   8  -3   19.19    0.83
  -1  -8   3   16.00    0.65
  -1  -8   3   17.70    0.81
   0   8  -3    0.38    0.31
   0  -8   3    0.04    0.32
   0  -8   3    0.17    0.26
   1  -8   3    2.66    0.45
   1  -8   3    2.02    0.35
   1  -8   3    2.51    0.40
   2  -8   3    1.50    0.37
   2  -8   3    1.85    0.33
   2  -8   3    1.50    0.38
  -3   8  -3   -0.04    0.32
   3  -8   3    0.27    0.33
   3  -8   3    0.09    0.27
  -4   8  -3   25.68    1.06
   4  -8   3   26.32    0.94
   4  -8   3   24.18    1.12
  -5   8  -3   -0.20    0.36
   5  -8   3    1.13    0.36
   5  -8   3    0.50    0.44
  -6   8  -3   -0.32    0.41
   6  -8   3    0.49    0.35
   6  -8   3    0.07    0.52
  -7   8  -3   22.46    1.11
   7  -8   3   24.73    1.39
  -8   8  -3    1.06    0.49
   8  -8   3    0.49    0.60
   9  -8   3    8.22    1.07
  10  -8   3    2.03    0.81
  12   7  -3   12.42    1.24
 -12  -7   3   10.61    1.02
  11   7  -3    1.42    0.64
 -11  -7   3    0.65    0.55
  10   7  -3    1.64    0.66
 -10  -7   3    0.56    0.51
   9   7  -3    1.16    0.61
  -9  -7   3    1.23    0.51
   8   7  -3    4.50    0.71
  -8  -7   3    4.40    0.64
   7   7  -3    0.35    0.45
  -7  -7   3    0.23    0.42
   6   7  -3    7.69    0.73
  -6  -7   3    5.83    0.61
   5   7  -3    0.49    0.38
  -5  -7   3    0.64    0.38
   4   7  -3   35.78    1.27
  -4  -7   3   38.13    1.26
   3   7  -3    1.45    0.35
  -3  -7   3    1.86    0.16
  -3  -7   3    2.14    0.40
   2   7  -3    4.02    0.46
  -2  -7   3    4.07    0.28
  -2  -7   3    3.77    0.46
   1   7  -3   -0.26    0.29
  -1  -7   3    0.11    0.30
  -1  -7   3    0.18    0.21
   0  -7   3    1.76    0.36
   0  -7   3    1.66    0.34
   0  -7   3    2.11    0.33
   1  -7   3   17.05    0.71
   1  -7   3   17.93    0.82
   1  -7   3   16.72    0.77
   2  -7   3   36.60    1.19
   2  -7   3   38.84    1.10
   2  -7   3   36.65    1.18
  -3   7  -3    1.18    0.34
   3  -7   3    0.58    0.35
   3  -7   3    0.94    0.30
  -4   7  -3   70.01    1.82
   4  -7   3   66.74    1.72
   4  -7   3   68.01    1.97
  -5   7  -3    2.01    0.47
   5  -7   3    2.19    0.40
   5  -7   3    2.07    0.55
  -6   7  -3   10.13    0.78
   6  -7   3   10.12    0.71
   6  -7   3    9.74    0.90
  -7   7  -3   -0.53    0.36
   7  -7   3    0.65    0.39
   7  -7   3    0.00    0.52
  -8   7  -3   16.51    1.01
   8  -7   3   19.14    1.23
   9  -7   3   -0.02    0.57
  10  -7   3    4.21    0.85
  12   6  -3    0.31    0.64
 -12  -6   3    1.36    0.60
  11   6  -3    3.66    0.75
 -11  -6   3    2.85    0.65
  10   6  -3    0.42    0.53
 -10  -6   3    0.70    0.46
   9   6  -3   10.17    0.94
  -9  -6   3    9.49    0.87
   8   6  -3   21.87    1.20
  -8  -6   3   21.78    1.09
   7   6  -3   11.48    0.87
  -7  -6   3    9.79    0.78
  -7  -6   3   11.30    0.53
   6   6  -3    1.52    0.43
  -6  -6   3    2.02    0.43
   5   6  -3   93.14    2.31
  -5  -6   3   91.77    2.25
  -5  -6   3   88.85    1.79
   4   6  -3    1.87    0.40
  -4  -6   3    0.62    0.36
   3   6  -3   37.18    1.18
  -3  -6   3   37.98    1.17
   2   6  -3    2.45    0.39
  -2  -6   3    3.02    0.22
  -2  -6   3    1.98    0.38
   1   6  -3   15.56    0.74
  -1  -6   3   17.33    0.57
  -1  -6   3   15.75    0.74
   0  -6   3    7.69    0.53
   0  -6   3    7.47    0.53
   0  -6   3    7.85    0.51
   1  -6   3    4.50    0.42
   1  -6   3    3.86    0.43
   1  -6   3    4.09    0.39
   2  -6   3    7.12    0.49
   2  -6   3    6.21    0.51
   2  -6   3    6.72    0.56
  -3   6  -3    3.03    0.41
   3  -6   3    3.32    0.40
   3  -6   3    2.60    0.45
  -4   6  -3    0.18    0.29
   4  -6   3   -0.17    0.38
   4  -6   3    0.26    0.29
  -5   6  -3   10.70    0.75
   5  -6   3   11.22    0.66
   5  -6   3   10.89    0.85
  -6   6  -3    1.17    0.41
   6  -6   3    0.19    0.42
   6  -6   3    0.97    0.36
  -7   6  -3   25.17    1.13
   7  -6   3   26.27    1.06
   7  -6   3   22.83    1.29
  -8   6  -3    1.43    0.48
   8  -6   3    0.98    0.45
   8  -6   3    1.03    0.60
  -9   6  -3    4.94    0.69
   9  -6   3    4.62    0.81
  10  -6   3   -0.77    0.52
  11  -6   3    1.51    0.75
  12   5  -3    1.57    0.69
 -12  -5   3    2.47    0.67
  11   5  -3    4.37    0.75
 -11  -5   3    3.93    0.72
  10   5  -3    0.30    0.53
 -10  -5   3   -0.01    0.45
   9   5  -3    0.38    0.50
  -9  -5   3    0.92    0.50
   8   5  -3   20.04    1.15
  -8  -5   3   21.45    1.09
  -8  -5   3   19.34    0.80
   7   5  -3   12.86    0.86
  -7  -5   3   13.45    0.59
  -7  -5   3   13.50    0.81
   6   5  -3   32.39    1.26
  -6  -5   3   33.23    0.88
  -6  -5   3   33.37    1.18
   5   5  -3   10.66    0.71
  -5  -5   3   10.24    0.39
  -5  -5   3    8.77    0.65
   4   5  -3   30.48    1.11
  -4  -5   3   29.65    1.03
   3   5  -3    9.77    0.68
  -3  -5   3    9.60    0.59
   2   5  -3   11.13    0.68
  -2  -5   3    9.99    0.60
   1   5  -3   24.62    0.85
  -1  -5   3   26.37    0.69
  -1  -5   3   25.80    0.91
   0  -5   3    2.72    0.35
   0  -5   3    2.79    0.35
   0  -5   3    2.85    0.32
   1  -5   3    2.86    0.37
   1  -5   3    2.89    0.37
   1  -5   3    3.57    0.39
   2  -5   3    0.23    0.25
   2  -5   3    0.30    0.29
   2  -5   3    0.07    0.25
  -3   5  -3    0.30    0.29
   3  -5   3    0.15    0.31
   3  -5   3   -0.28    0.25
  -4   5  -3  118.39    2.64
   4  -5   3  121.18    2.86
   4  -5   3  119.50    2.65
  -5   5  -3    9.09    0.63
   5  -5   3    8.04    0.60
   5  -5   3    7.41    0.70
  -6   5  -3   20.51    0.91
   6  -5   3   21.41    0.91
   6  -5   3   19.97    1.11
  -7   5  -3    6.66    0.65
   7  -5   3    5.25    0.71
   7  -5   3    6.74    0.62
  -8   5  -3   22.39    1.09
   8  -5   3   21.73    1.24
   8  -5   3   22.24    1.05
  -9   5  -3    3.26    0.59
   9  -5   3    4.53    0.80
   9  -5   3    4.04    0.62
  10  -5   3   -0.16    0.60
  11  -5   3    1.67    0.74
  12   4  -3   -0.76    0.50
 -12  -4   3    0.38    0.54
  11   4  -3    6.59    0.90
 -11  -4   3    7.60    0.85
  10   4  -3    0.53    0.49
 -10  -4   3   -0.04    0.47
   9   4  -3   19.47    1.11
  -9  -4   3   18.69    0.93
  -9  -4   3   19.64    1.09
   8   4  -3   39.85    1.18
   8   4  -3   35.98    1.41
  -8  -4   3   37.39    1.38
   7   4  -3   -0.24    0.26
   7   4  -3    0.11    0.39
  -7  -4   3   -0.06    0.39
   6   4  -3    2.45    0.30
   6   4  -3    2.75    0.46
  -6  -4   3    2.81    0.49
   5   4  -3   75.99    2.00
  -5  -4   3   81.45    1.99
  -5  -4   3   80.29    1.68
   4   4  -3    7.98    0.60
  -4  -4   3    6.08    0.30
  -4  -4   3    6.81    0.54
   3   4  -3  102.60    2.33
  -3  -4   3  101.39    2.28
   2   4  -3   70.66    1.75
  -2  -4   3   74.22    1.73
   1   4  -3    5.24    0.44
  -1  -4   3    4.93    0.41
  -1  -4   3    4.90    0.31
   0  -4   3    0.94    0.25
   0  -4   3    0.39    0.27
   0  -4   3    0.48    0.28
   1  -4   3   17.22    0.64
   1  -4   3   16.85    0.67
   1  -4   3   15.34    0.64
   2  -4   3    7.83    0.51
   2  -4   3    7.64    0.49
   2  -4   3    7.49    0.54
  -3   4  -3   40.89    1.12
   3  -4   3   40.36    1.13
  -4   4  -3   44.22    1.21
   4  -4   3   42.51    1.23
   4  -4   3   44.11    1.39
  -5   4  -3    1.12    0.31
   5  -4   3    1.16    0.42
   5  -4   3    0.62    0.32
  -6   4  -3    1.16    0.37
   6  -4   3    1.31    0.38
   6  -4   3    1.15    0.46
  -7   4  -3   29.96    1.10
   7  -4   3   28.21    1.11
   7  -4   3   29.26    1.36
  -8   4  -3    6.47    0.66
   8  -4   3    9.53    0.77
   8  -4   3    6.13    0.81
  -9   4  -3    6.10    0.69
   9  -4   3    7.57    0.95
   9  -4   3    7.60    0.80
  10  -4   3    0.22    0.48
  10  -4   3   -0.13    0.55
  11  -4   3    1.44    0.70
  12   3  -3    0.22    0.64
 -12  -3   3    0.20    0.56
  11   3  -3    1.46    0.59
 -11  -3   3    0.95    0.53
  10   3  -3    2.44    0.61
 -10  -3   3    1.78    0.56
   9   3  -3    0.97    0.51
   9   3  -3    2.42    0.48
  -9  -3   3    2.16    0.55
   8   3  -3   12.23    0.93
  -8  -3   3   11.83    0.91
   7   3  -3   11.86    0.85
   7   3  -3   12.57    0.65
  -7  -3   3   12.31    0.84
   6   3  -3   22.24    0.76
   6   3  -3   20.59    0.93
  -6  -3   3   20.51    0.96
   5   3  -3   32.84    0.90
   5   3  -3   33.39    1.17
  -5  -3   3   34.04    1.14
   4   3  -3    0.13    0.18
   4   3  -3   -0.01    0.28
  -4  -3   3    0.12    0.30
   3   3  -3    0.96    0.34
  -3  -3   3    0.81    0.30
   2   3  -3    8.81    0.55
  -2  -3   3    8.14    0.51
  -1  -3   3   35.52    0.98
  -1  -3   3   36.45    0.79
  -1  -3   3   36.19    0.97
   0  -3   3    2.21    0.27
   0  -3   3    2.63    0.31
   0  -3   3    2.33    0.31
   1  -3   3   -0.16    0.24
   1  -3   3   -0.19    0.21
   1  -3   3    0.07    0.24
   2  -3   3    3.26    0.32
   2  -3   3    2.59    0.37
   2  -3   3    3.50    0.37
  -3   3  -3    1.03    0.27
   3  -3   3    0.98    0.33
   3  -3   3    0.86    0.30
  -4   3  -3    3.44    0.37
   4  -3   3    3.68    0.41
   4  -3   3    3.24    0.48
  -5   3  -3   49.18    1.31
   5  -3   3   50.15    1.41
   5  -3   3   48.97    1.54
  -6   3  -3    3.84    0.46
   6  -3   3    3.55    0.48
   6  -3   3    3.06    0.54
  -7   3  -3    2.07    0.42
   7  -3   3    0.83    0.49
   7  -3   3    2.13    0.44
  -8   3  -3    0.42    0.39
   8  -3   3    0.70    0.44
   8  -3   3    0.45    0.53
  -9   3  -3    1.91    0.49
   9  -3   3    0.31    0.40
   9  -3   3    1.35    0.54
  10  -3   3   15.64    1.08
  10  -3   3   14.87    1.20
  11  -3   3    8.85    1.05
  11  -3   3    9.86    0.98
  12   2  -3    0.51    0.53
 -12  -2   3    1.61    0.63
  11   2  -3    4.22    0.81
 -11  -2   3    4.01    0.72
  10   2  -3    1.90    0.54
  10   2  -3    1.70    0.57
 -10  -2   3    0.81    0.51
   9   2  -3   10.01    0.88
   9   2  -3   11.38    0.82
  -9  -2   3   10.48    0.89
   8   2  -3   77.93    2.21
   8   2  -3   79.03    2.05
  -8  -2   3   80.42    2.22
   7   2  -3   32.72    1.07
   7   2  -3   31.65    1.19
  -7  -2   3   30.48    1.21
   6   2  -3    3.20    0.45
   6   2  -3    3.61    0.40
  -6  -2   3    4.17    0.50
   5   2  -3   22.65    0.76
   5   2  -3   22.50    0.92
  -5  -2   3   22.23    0.93
   4   2  -3    0.10    0.30
   4   2  -3    0.05    0.20
  -4  -2   3   -0.20    0.27
   3   2  -3   33.51    0.78
   3   2  -3   34.57    1.01
  -3  -2   3   35.60    1.01
   2   2  -3   17.05    0.68
  -1  -2   3   90.65    1.93
  -1  -2   3   88.91    1.88
   0  -2   3    2.61    0.27
   0  -2   3    2.59    0.29
   0  -2   3    2.83    0.26
   1  -2   3   86.06    1.84
   1  -2   3   84.22    1.72
   2  -2   3   18.49    0.72
   2  -2   3   18.03    0.70
  -3   2  -3  127.93    2.59
   3  -2   3  131.38    2.83
   3  -2   3  131.53    2.76
  -4   2  -3   93.62    2.02
   4  -2   3   96.24    2.18
   4  -2   3   94.93    2.28
  -5   2  -3   80.63    1.83
   5  -2   3   78.21    1.95
   5  -2   3   83.43    2.12
  -6   2  -3    1.66    0.34
   6  -2   3    1.28    0.38
   6  -2   3    1.32    0.41
  -7   2  -3    7.23    0.58
   7  -2   3    5.98    0.61
   7  -2   3    6.89    0.75
  -8   2  -3   -0.32    0.34
   8  -2   3   -0.24    0.35
   8  -2   3    0.13    0.44
  -9   2  -3   12.70    0.84
   9  -2   3   11.56    0.99
   9  -2   3   11.00    0.90
  10  -2   3   16.83    1.14
  10  -2   3   16.43    1.02
  11  -2   3    8.58    1.05
  11  -2   3    8.79    0.88
  12  -2   3    0.05    0.62
  12  -2   3    1.16    0.69
  12   1  -3   -0.48    0.55
 -12  -1   3   -0.36    0.54
  11   1  -3   -0.28    0.50
  11   1  -3    0.85    0.52
 -11  -1   3    1.66    0.59
  10   1  -3    5.34    0.76
  10   1  -3    6.63    0.73
 -10  -1   3    6.25    0.79
   9   1  -3    5.53    0.66
   9   1  -3    6.21    0.72
  -9  -1   3    7.13    0.77
   8   1  -3    3.71    0.53
   8   1  -3    4.08    0.59
  -8  -1   3    2.18    0.51
   7   1  -3   10.11    0.70
   7   1  -3   10.02    0.66
  -7  -1   3    8.76    0.72
   6   1  -3   16.86    0.84
   6   1  -3   17.48    0.77
  -6  -1   3   16.26    0.86
   5   1  -3    2.24    0.32
   5   1  -3    2.09    0.36
  -5  -1   3    2.08    0.40
   4   1  -3    0.15    0.22
   4   1  -3   -0.13    0.28
  -4  -1   3    0.33    0.29
   3   1  -3   14.18    0.51
   3   1  -3   12.48    0.59
  -3  -1   3   13.55    0.62
   2   1  -3  102.17    2.13
   2   1  -3  100.15    1.99
  -2  -1   3  101.92    2.14
   1   1  -3  257.74    4.95
  -1  -1   3  267.83    5.06
  -1  -1   3  268.02    4.99
   0   1  -3    7.56    0.39
   0  -1   3    8.55    0.41
   0  -1   3    6.76    0.38
   1  -1   3   68.54    1.49
   1  -1   3   66.49    1.33
  -2   1  -3  290.14    5.41
   2  -1   3  292.56    5.66
   2  -1   3  295.44    5.68
  -3   1  -3   60.37    1.30
   3  -1   3   59.71    1.51
   3  -1   3   62.16    1.50
  -4   1  -3   12.50    0.53
   4  -1   3   12.65    0.74
   4  -1   3   10.16    0.64
  -5   1  -3   48.71    1.22
   5  -1   3   50.66    1.46
   5  -1   3   47.59    1.40
  -6   1  -3   21.72    0.79
   6  -1   3   21.76    1.02
   6  -1   3   20.34    0.92
  -7   1  -3    7.89    0.58
   7  -1   3    6.66    0.69
   7  -1   3    7.86    0.68
  -8   1  -3   19.38    0.89
   8  -1   3   19.32    1.06
   8  -1   3   19.93    1.04
  -9   1  -3    1.89    0.45
   9  -1   3    0.78    0.56
   9  -1   3    1.48    0.53
  10  -1   3   14.38    1.16
  10  -1   3   15.08    1.05
  11  -1   3   46.59    1.79
  11  -1   3   45.22    1.90
 -12   1  -3    1.90    0.70
  12  -1   3    0.86    0.59
  12   0  -3    1.00    0.61
 -12   0   3    2.32    0.68
  11   0  -3   17.75    1.13
  11   0  -3   17.41    1.13
 -11   0   3   16.63    1.12
  10   0  -3    1.37    0.52
  10   0  -3    0.35    0.52
 -10   0   3    1.51    0.54
   9   0  -3    0.41    0.45
   9   0  -3    1.24    0.49
  -9   0   3    1.15    0.50
   8   0  -3   26.77    1.13
   8   0  -3   25.98    1.11
  -8   0   3   27.24    1.22
   7   0  -3   46.19    1.43
   7   0  -3   42.37    1.37
  -7   0   3   45.18    1.49
   6   0  -3    0.94    0.34
   6   0  -3    0.88    0.31
  -6   0   3    1.24    0.42
   5   0  -3   34.77    1.11
   5   0  -3   38.49    1.10
  -5   0   3   38.21    1.19
   4   0  -3    9.93    0.52
   4   0  -3   10.52    0.60
  -4   0   3   10.58    0.62
   3   0  -3   80.19    1.79
   3   0  -3   81.93    1.76
  -3   0   3   79.59    1.86
   2   0  -3   32.64    0.81
   2   0  -3   32.03    0.86
  -2   0   3   31.32    0.90
   1   0  -3    6.33    0.35
  -1   0   3    6.61    0.42
  -1   0   3    6.93    0.38
   0   0  -3    0.56    0.19
   0   0   3    1.17    0.20
   0   0   3    1.43    0.17
  -1   0  -3  149.49    2.96
   1   0   3  149.24    2.96
  -2   0  -3  132.52    2.73
  -3   0  -3   20.60    0.55
   3   0   3   21.45    0.82
   3   0   3   19.69    0.79
  -4   0  -3    4.45    0.32
   4   0   3    4.27    0.45
   4   0   3    3.58    0.40
  -5   0  -3   25.25    0.78
   5   0   3   23.79    0.97
   5   0   3   25.23    0.96
  -6   0  -3   15.25    0.66
   6   0   3   13.64    0.80
   6   0   3   13.37    0.78
  -7   0  -3   18.99    0.79
   7   0   3   20.44    0.95
   7   0   3   20.52    1.02
  -8   0  -3    3.07    0.45
   8   0   3    2.30    0.51
   8   0   3    2.18    0.54
  -9   0  -3    0.87    0.39
   9   0   3    0.10    0.40
   9   0   3    0.28    0.50
  10   0   3    3.58    0.66
  10   0   3    3.26    0.66
  11   0   3    3.11    0.72
 -12   0  -3    0.90    0.72
  12   0   3    1.08    0.63
  12  -1  -3    0.06    0.57
 -12   1   3    0.28    0.58
  11  -1  -3    0.71    0.58
  11  -1  -3    0.32    0.49
 -11   1   3    0.30    0.58
  10  -1  -3   16.98    1.09
  10  -1  -3   14.09    0.97
 -10   1   3   17.92    1.13
   9  -1  -3    5.77    0.68
   9  -1  -3    4.65    0.67
  -9   1   3    5.67    0.73
   8  -1  -3   10.82    0.79
   8  -1  -3   11.62    0.87
  -8   1   3   12.31    0.93
   7  -1  -3   -0.26    0.34
   7  -1  -3    0.32    0.35
  -7   1   3   -0.07    0.40
   6  -1  -3    0.13    0.30
   6  -1  -3    0.85    0.32
  -6   1   3    0.12    0.34
   5  -1  -3   -0.20    0.27
   5  -1  -3   -0.07    0.28
  -5   1   3    0.01    0.33
   4  -1  -3    2.91    0.34
   4  -1  -3    2.61    0.37
  -4   1   3    2.21    0.37
   3  -1  -3    0.94    0.28
   3  -1  -3    1.35    0.28
  -3   1   3    1.05    0.33
   2  -1  -3    4.13    0.30
   2  -1  -3    3.19    0.32
  -2   1   3    3.50    0.35
   1  -1  -3    8.09    0.42
  -1   1   3    7.77    0.44
  -1   1   3    8.15    0.35
   0  -1  -3    3.42    0.27
   0   1   3    3.40    0.23
   0   1   3    3.27    0.25
  -1  -1  -3    6.04    0.41
   1   1   3    6.56    0.38
  -2  -1  -3    1.45    0.29
   2   1   3    1.10    0.27
  -3  -1  -3    7.81    0.32
  -3  -1  -3    8.66    0.53
   3   1   3    7.70    0.52
  -4  -1  -3    3.95    0.29
  -4  -1  -3    3.97    0.44
   4   1   3    3.64    0.43
  -5  -1  -3   11.89    0.53
   5   1   3   11.30    0.66
   5   1   3   11.85    0.66
  -6  -1  -3    2.97    0.35
   6   1   3    2.34    0.43
   6   1   3    2.61    0.44
  -7  -1  -3   23.35    0.87
   7   1   3   24.43    1.07
   7   1   3   22.85    1.02
  -8  -1  -3   59.17    1.59
   8   1   3   60.32    1.86
   8   1   3   59.85    1.87
  -9  -1  -3    0.09    0.38
   9   1   3   -0.89    0.43
   9   1   3    0.07    0.44
 -10  -1  -3   -0.67    0.43
  10   1   3    0.64    0.52
 -11  -1  -3    8.41    0.91
  11   1   3    7.44    0.87
 -12  -1  -3   21.47    1.39
  12   1   3   18.17    1.27
  12  -2  -3    2.40    0.76
 -12   2   3    2.74    0.74
  11  -2  -3   15.09    1.22
 -11   2   3   14.44    1.17
  10  -2  -3    2.08    0.52
  10  -2  -3    1.66    0.56
 -10   2   3    1.01    0.56
   9  -2  -3    4.54    0.69
   9  -2  -3    4.03    0.59
  -9   2   3    4.14    0.68
   8  -2  -3    0.63    0.45
   8  -2  -3    0.70    0.39
  -8   2   3    1.81    0.55
   7  -2  -3    4.75    0.59
   7  -2  -3    5.35    0.53
  -7   2   3    4.36    0.61
   6  -2  -3   11.02    0.77
   6  -2  -3   12.34    0.68
  -6   2   3   14.03    0.79
   5  -2  -3    6.67    0.56
   5  -2  -3    6.65    0.49
  -5   2   3    6.28    0.56
   4  -2  -3    0.95    0.29
   4  -2  -3    1.00    0.31
  -4   2   3    1.14    0.36
   3  -2  -3   28.29    0.77
   3  -2  -3   28.58    0.92
  -3   2   3   27.96    0.91
   2  -2  -3    1.08    0.29
   2  -2  -3    1.11    0.20
  -2   2   3    1.45    0.33
   1  -2  -3    9.79    0.46
  -1   2   3    9.73    0.47
  -1   2   3    9.29    0.35
   0  -2  -3   -0.10    0.21
   0   2   3   -0.04    0.17
   0   2   3   -0.11    0.18
  -1  -2  -3   -0.02    0.21
   1   2   3    0.37    0.15
   1   2   3    0.18    0.20
  -2  -2  -3   79.94    1.58
  -2  -2  -3   81.43    1.81
   2   2   3   84.36    1.80
  -3  -2  -3  106.84    2.33
  -3  -2  -3  106.96    2.09
   3   2   3  109.04    2.35
  -4  -2  -3    4.56    0.31
  -4  -2  -3    3.94    0.44
   4   2   3    3.77    0.43
  -5  -2  -3    1.74    0.27
  -5  -2  -3    1.22    0.34
   5   2   3    1.43    0.36
  -6  -2  -3    7.25    0.48
  -6  -2  -3    8.17    0.62
   6   2   3    6.99    0.62
  -7  -2  -3   55.98    1.45
  -7  -2  -3   55.48    1.66
   7   2   3   56.14    1.70
  -8  -2  -3    0.10    0.33
  -8  -2  -3   -0.04    0.40
   8   2   3    0.98    0.48
  -9  -2  -3   10.14    0.72
  -9  -2  -3    9.24    0.85
   9   2   3    8.95    0.84
 -10  -2  -3    0.11    0.50
  10   2   3    0.38    0.51
 -11  -2  -3    4.06    0.74
  11   2   3    3.22    0.76
 -12  -2  -3    1.40    0.63
  12   2   3    0.46    0.54
  11  -3  -3   -0.85    0.51
 -11   3   3   -0.02    0.55
  10  -3  -3   12.68    1.09
 -10   3   3   14.05    1.12
   9  -3  -3   14.70    1.10
   9  -3  -3   13.68    0.89
  -9   3   3   16.19    1.09
   8  -3  -3    4.29    0.53
   8  -3  -3    4.18    0.65
  -8   3   3    3.66    0.65
   7  -3  -3   -0.12    0.31
   7  -3  -3    0.07    0.40
  -7   3   3    0.09    0.37
   6  -3  -3   13.94    0.83
   6  -3  -3   14.06    0.67
  -6   3   3   15.61    0.88
   5  -3  -3    6.37    0.45
   5  -3  -3    5.86    0.56
  -5   3   3    5.85    0.56
   4  -3  -3    7.86    0.46
   4  -3  -3    8.54    0.59
  -4   3   3    8.12    0.61
   3  -3  -3    1.52    0.23
   3  -3  -3    1.41    0.32
  -3   3   3    1.38    0.34
   2  -3  -3    0.43    0.15
   2  -3  -3    0.45    0.28
  -2   3   3    0.43    0.31
   1  -3  -3    9.19    0.56
  -1   3   3    7.54    0.48
   0  -3  -3    3.57    0.33
   0   3   3    4.09    0.25
   0   3   3    3.90    0.32
  -1  -3  -3   18.39    0.57
  -1  -3  -3   18.33    0.68
   1   3   3   19.13    0.61
  -2  -3  -3   81.95    1.79
  -2  -3  -3   78.78    1.63
   2   3   3   83.49    1.80
  -3  -3  -3   35.29    0.85
  -3  -3  -3   35.79    1.03
   3   3   3   35.49    1.05
  -4  -3  -3   36.17    1.07
  -4  -3  -3   36.98    0.92
   4   3   3   36.61    1.13
  -5  -3  -3   37.56    1.18
  -5  -3  -3   38.10    1.00
   5   3   3   39.58    1.27
  -6  -3  -3   12.22    0.74
  -6  -3  -3   13.35    0.60
   6   3   3   12.84    0.82
  -7  -3  -3    2.10    0.45
  -7  -3  -3    1.57    0.36
   7   3   3    2.07    0.49
  -8  -3  -3  103.46    2.61
  -8  -3  -3  102.74    2.38
   8   3   3  102.38    2.72
  -9  -3  -3    2.45    0.54
  -9  -3  -3    1.98    0.44
   9   3   3    1.26    0.54
 -10  -3  -3    0.13    0.48
  10   3   3   -0.02    0.47
 -11  -3  -3   11.77    0.99
  11   3   3   10.70    1.06
 -12  -3  -3    0.53    0.61
  12   3   3    1.35    0.60
  11  -4  -3    4.77    0.85
 -11   4   3    7.00    0.92
  10  -4  -3    0.71    0.57
 -10   4   3    1.91    0.70
   9  -4  -3   -0.39    0.50
  -9   4   3    0.07    0.52
   8  -4  -3    5.55    0.57
   8  -4  -3    6.67    0.77
  -8   4   3    4.89    0.70
   7  -4  -3    0.04    0.41
   7  -4  -3    0.27    0.30
  -7   4   3   -0.32    0.37
   6  -4  -3    0.06    0.31
   6  -4  -3    0.12    0.26
  -6   4   3   -0.12    0.36
   5  -4  -3   95.53    2.07
   5  -4  -3   93.21    2.34
  -5   4   3   95.10    2.33
   4  -4  -3    9.25    0.64
   4  -4  -3    8.03    0.42
  -4   4   3   10.04    0.68
   3  -4  -3   11.24    0.41
   3  -4  -3   12.31    0.72
  -3   4   3   12.76    0.72
   2  -4  -3   30.47    0.96
  -2   4   3   29.28    0.94
   1  -4  -3    0.22    0.30
  -1   4   3   -0.14    0.29
   0  -4  -3   13.11    0.66
   0   4   3   12.16    0.59
   0   4   3   12.07    0.40
  -1  -4  -3    1.62    0.31
  -1  -4  -3    1.75    0.28
   1   4   3    1.42    0.26
  -2  -4  -3   -0.28    0.24
  -2  -4  -3   -0.03    0.22
   2   4   3   -0.27    0.26
  -3  -4  -3   19.76    0.74
  -3  -4  -3   20.60    0.64
   3   4   3   18.50    0.74
  -4  -4  -3   -0.13    0.22
  -4  -4  -3   -0.10    0.30
   4   4   3   -0.21    0.30
  -5  -4  -3    0.25    0.31
  -5  -4  -3    0.54    0.24
   5   4   3    0.46    0.34
  -6  -4  -3   -0.50    0.28
  -6  -4  -3    0.21    0.26
   6   4   3    0.38    0.34
  -7  -4  -3   26.58    1.05
  -7  -4  -3   25.24    0.90
   7   4   3   24.26    1.15
  -8  -4  -3    3.66    0.47
  -8  -4  -3    2.91    0.55
   8   4   3    2.91    0.60
  -9  -4  -3   38.05    1.26
  -9  -4  -3   38.02    1.43
   9   4   3   38.33    1.53
 -10  -4  -3    1.69    0.55
  10   4   3    3.64    0.72
 -11  -4  -3    2.30    0.63
  11   4   3    1.87    0.64
 -12  -4  -3    0.47    0.57
  12   4   3   -0.35    0.55
  11  -5  -3    7.18    0.97
 -11   5   3    7.98    0.96
  10  -5  -3    1.86    0.70
 -10   5   3    1.16    0.62
   9  -5  -3    0.20    0.50
  -9   5   3   -0.08    0.48
   8  -5  -3    0.22    0.46
  -8   5   3    0.50    0.49
   7  -5  -3    0.18    0.32
   7  -5  -3   -0.35    0.44
  -7   5   3    0.28    0.43
   6  -5  -3   61.55    1.88
   6  -5  -3   62.88    1.53
  -6   5   3   62.00    1.86
   5  -5  -3   17.90    0.91
   5  -5  -3   19.10    0.66
  -5   5   3   17.67    0.94
   4  -5  -3   11.35    0.71
   4  -5  -3   11.13    0.43
  -4   5   3   11.69    0.76
   3  -5  -3    5.73    0.52
   3  -5  -3    5.90    0.28
  -3   5   3    6.03    0.54
   2  -5  -3   17.80    0.81
  -2   5   3   17.77    0.78
   1  -5  -3   73.23    1.78
  -1   5   3   75.54    1.76
   0  -5  -3   13.63    0.67
   0   5   3   12.38    0.43
   0   5   3   13.09    0.65
  -1  -5  -3   54.13    1.38
  -1  -5  -3   58.03    1.35
   1   5   3   56.63    1.29
  -2  -5  -3   12.00    0.61
  -2  -5  -3   12.83    0.55
   2   5   3   11.86    0.62
  -3  -5  -3    5.54    0.40
  -3  -5  -3    5.76    0.44
   3   5   3    5.11    0.47
  -4  -5  -3   41.38    1.10
  -4  -5  -3   41.79    1.17
   4   5   3   42.84    1.29
  -5  -5  -3    8.32    0.57
  -5  -5  -3    7.02    0.48
   5   5   3    7.42    0.62
  -6  -5  -3    3.35    0.38
  -6  -5  -3    3.76    0.46
   6   5   3    2.38    0.47
  -7  -5  -3    1.95    0.36
  -7  -5  -3    1.95    0.43
   7   5   3    2.02    0.49
  -8  -5  -3   10.01    0.67
  -8  -5  -3   10.39    0.78
   8   5   3    9.45    0.87
  -9  -5  -3    1.87    0.51
  -9  -5  -3    1.53    0.45
   9   5   3    0.96    0.56
 -10  -5  -3   22.01    1.02
 -10  -5  -3   23.83    1.17
  10   5   3   23.44    1.27
 -11  -5  -3    8.18    0.87
  11   5   3    8.98    1.07
 -12  -5  -3   -0.16    0.53
  12   5   3   -0.80    0.59
  11  -6  -3    0.86    0.67
 -11   6   3    0.09    0.57
  10  -6  -3    1.07    0.63
 -10   6   3    1.59    0.61
   9  -6  -3    7.53    0.92
  -9   6   3    7.47    0.99
   8  -6  -3   14.28    1.03
  -8   6   3   18.11    1.10
   7  -6  -3    1.44    0.53
  -7   6   3    0.95    0.50
   6  -6  -3    0.86    0.46
   6  -6  -3    1.25    0.26
  -6   6   3    0.91    0.41
   5  -6  -3  107.06    2.21
   5  -6  -3  104.01    2.67
  -5   6   3  108.16    2.65
   4  -6  -3   12.01    0.41
   4  -6  -3   11.62    0.80
  -4   6   3   10.52    0.71
   3  -6  -3   10.76    0.72
  -3   6   3    9.02    0.65
   2  -6  -3   46.42    1.35
  -2   6   3   47.27    1.33
   1  -6  -3  187.54    3.97
  -1   6   3  195.06    3.92
   0  -6  -3    1.11    0.34
   0  -6  -3    1.15    0.31
   0   6   3    1.21    0.20
  -1  -6  -3  327.25    6.37
  -1  -6  -3  326.56    6.26
   1   6   3  325.30    6.22
  -2  -6  -3   37.38    1.08
  -2  -6  -3   39.55    1.07
   2   6   3   39.23    1.08
  -3  -6  -3    4.13    0.41
  -3  -6  -3    4.30    0.40
   3   6   3    4.35    0.43
  -4  -6  -3    2.33    0.33
  -4  -6  -3    2.74    0.35
   4   6   3    2.10    0.41
  -5  -6  -3   44.10    1.28
  -5  -6  -3   44.13    1.23
   5   6   3   45.62    1.40
  -6  -6  -3    1.77    0.33
  -6  -6  -3    2.40    0.39
   6   6   3    1.70    0.43
  -7  -6  -3    0.07    0.30
  -7  -6  -3   -0.13    0.31
   7   6   3   -0.47    0.34
  -8  -6  -3    2.85    0.45
  -8  -6  -3    2.41    0.48
   8   6   3    2.53    0.56
  -9  -6  -3   16.70    0.93
  -9  -6  -3   13.77    0.82
   9   6   3   14.96    1.13
 -10  -6  -3    0.56    0.50
 -10  -6  -3    0.28    0.39
  10   6   3   -0.14    0.48
 -11  -6  -3    3.09    0.64
  11   6   3    1.75    0.69
  12   6   3    0.51    0.64
  10  -7  -3    0.11    0.56
 -10   7   3    0.02    0.53
   9  -7  -3    0.85    0.61
  -9   7   3    0.16    0.55
   8  -7  -3   -0.40    0.44
  -8   7   3    0.98    0.56
   7  -7  -3   25.38    1.28
  -7   7   3   23.10    1.18
   6  -7  -3   11.10    0.92
  -6   7   3    9.35    0.83
   5  -7  -3    5.99    0.70
  -5   7   3    6.05    0.68
   4  -7  -3   14.91    0.42
   4  -7  -3   15.66    0.87
  -4   7   3   15.78    0.89
   3  -7  -3    1.51    0.41
  -3   7   3    1.17    0.37
   2  -7  -3    1.14    0.39
  -2   7   3    1.64    0.38
   1  -7  -3   72.95    1.87
  -1   7   3   73.25    1.82
   0  -7  -3   62.31    1.61
   0  -7  -3   61.16    1.57
   0   7   3   64.63    1.36
  -1  -7  -3   30.63    1.02
  -1  -7  -3   30.59    1.01
   1   7   3   32.49    0.89
  -2  -7  -3   32.54    1.01
  -2  -7  -3   32.17    1.01
   2   7   3   33.49    0.99
  -3  -7  -3   34.15    1.03
  -3  -7  -3   32.72    1.02
   3   7   3   32.88    1.08
  -4  -7  -3    1.66    0.33
  -4  -7  -3    1.12    0.30
   4   7   3    1.08    0.35
  -5  -7  -3   18.59    0.76
  -5  -7  -3   18.40    0.76
   5   7   3   18.97    0.95
  -6  -7  -3   21.18    0.88
  -6  -7  -3   22.58    0.87
   6   7   3   22.20    1.06
  -7  -7  -3    2.00    0.41
  -7  -7  -3    2.14    0.41
   7   7   3    1.50    0.46
  -8  -7  -3    4.61    0.55
  -8  -7  -3    5.30    0.55
   8   7   3    5.57    0.69
  -9  -7  -3   12.15    0.90
  -9  -7  -3   10.91    0.76
   9   7   3   10.18    0.96
 -10  -7  -3   19.87    1.09
 -10  -7  -3   18.21    1.01
  10   7   3   21.20    1.30
 -11  -7  -3    6.71    0.77
  11   7   3    6.11    0.87
  12   7   3    0.56    0.62
  10  -8  -3    0.84    0.67
 -10   8   3    1.00    0.62
   9  -8  -3    1.24    0.65
  -9   8   3    2.41    0.65
   8  -8  -3    7.13    0.88
  -8   8   3    8.74    0.93
   7  -8  -3    5.14    0.77
  -7   8   3    6.26    0.80
   6  -8  -3    0.52    0.48
  -6   8   3    0.95    0.51
   5  -8  -3   10.04    0.90
  -5   8   3   11.19    0.88
   4  -8  -3   17.66    0.99
  -4   8   3   17.21    0.92
   3  -8  -3   18.71    0.92
  -3   8   3   18.66    0.90
   2  -8  -3  128.14    2.98
  -2   8   3  128.96    2.93
   1  -8  -3   52.85    1.49
  -1   8   3   52.31    1.08
  -1   8   3   51.73    1.48
   0  -8  -3    0.27    0.31
   0  -8  -3    0.01    0.32
   0   8   3    0.18    0.19
  -1  -8  -3  203.12    4.21
  -1  -8  -3  202.93    4.19
   1   8   3  204.60    4.04
  -2  -8  -3    9.90    0.64
  -2  -8  -3   10.29    0.63
   2   8   3   10.81    0.61
  -3  -8  -3    0.14    0.28
  -3  -8  -3    0.29    0.30
   3   8   3    0.03    0.27
  -4  -8  -3    8.03    0.55
  -4  -8  -3    8.11    0.59
   4   8   3    9.77    0.66
  -5  -8  -3   18.40    0.80
  -5  -8  -3   19.72    0.83
   5   8   3   19.73    0.92
  -6  -8  -3    5.37    0.51
  -6  -8  -3    4.51    0.50
   6   8   3    5.35    0.62
  -7  -8  -3   10.59    0.72
  -7  -8  -3   11.10    0.77
   7   8   3   10.68    0.89
  -8  -8  -3    1.86    0.45
  -8  -8  -3    2.70    0.46
   8   8   3    1.25    0.52
  -9  -8  -3    6.00    0.64
  -9  -8  -3    5.47    0.62
   9   8   3    4.09    0.73
 -10  -8  -3   30.30    1.27
 -10  -8  -3   29.56    1.23
  10   8   3   30.85    1.54
  11   8   3    2.02    0.66
  12   8   3    0.87    0.63
  10  -9  -3    7.04    1.03
 -10   9   3    8.96    1.01
   9  -9  -3    1.58    0.65
  -9   9   3    0.04    0.55
   8  -9  -3    0.64    0.62
  -8   9   3   -0.35    0.52
   7  -9  -3    9.76    0.98
  -7   9   3   10.33    0.97
   6  -9  -3   19.28    1.12
  -6   9   3   18.03    1.05
   5  -9  -3    6.34    0.73
  -5   9   3    8.71    0.83
   4  -9  -3   11.38    0.90
  -4   9   3   11.38    0.86
   3  -9  -3    2.13    0.46
  -3   9   3    2.15    0.51
   2  -9  -3    1.30    0.41
  -2   9   3    1.77    0.44
   1  -9  -3  122.55    2.85
  -1   9   3  121.29    2.38
  -1   9   3  122.37    2.82
   0  -9  -3   26.68    1.02
   0  -9  -3   24.43    0.99
   0   9   3   23.75    0.73
  -1  -9  -3   18.04    0.83
  -1  -9  -3   19.93    0.89
   1   9   3   19.89    0.73
  -2  -9  -3  139.38    3.02
  -2  -9  -3  137.09    3.05
   2   9   3  135.30    2.93
  -3  -9  -3   11.24    0.68
  -3  -9  -3   12.05    0.70
   3   9   3    9.98    0.68
  -4  -9  -3    2.47    0.42
  -4  -9  -3    1.86    0.34
   4   9   3    1.32    0.44
  -5  -9  -3   34.35    1.17
  -5  -9  -3   35.11    1.10
   5   9   3   36.51    1.28
  -6  -9  -3   32.12    1.11
  -6  -9  -3   31.85    1.08
   6   9   3   26.17    1.18
  -7  -9  -3    7.86    0.66
  -7  -9  -3    6.81    0.59
   7   9   3    7.21    0.75
  -8  -9  -3    5.83    0.65
  -8  -9  -3    5.49    0.59
   8   9   3    4.88    0.69
  -9  -9  -3    5.33    0.62
  -9  -9  -3    4.26    0.60
   9   9   3    3.70    0.69
 -10  -9  -3   12.97    0.94
  10   9   3   12.42    1.13
  11   9   3   13.29    1.26
  12   9   3    2.16    0.76
   9 -10  -3    7.56    1.02
  -9  10   3    7.01    0.93
   8 -10  -3    0.21    0.57
  -8  10   3    0.04    0.56
   7 -10  -3   46.39    1.87
  -7  10   3   46.11    1.79
   6 -10  -3    1.08    0.60
  -6  10   3    1.55    0.59
   5 -10  -3   -0.45    0.37
  -5  10   3    0.68    0.45
   4 -10  -3   10.87    0.91
  -4  10   3   10.49    0.85
   3 -10  -3   -0.07    0.38
  -3  10   3    0.30    0.39
   2 -10  -3    7.68    0.69
  -2  10   3    8.79    0.73
   1 -10  -3   23.90    1.03
  -1  10   3   26.58    1.07
  -1  10   3   26.56    0.69
   0 -10  -3    7.64    0.66
   0 -10  -3    6.70    0.62
   0  10   3    7.50    0.44
  -1 -10  -3  252.03    5.19
  -1 -10  -3  252.25    5.19
   1  10   3  249.76    4.97
  -2 -10  -3    2.28    0.45
  -2 -10  -3    1.87    0.39
   2  10   3    1.76    0.35
  -3 -10  -3   10.98    0.65
  -3 -10  -3   10.02    0.66
   3  10   3   11.91    0.75
  -4 -10  -3   15.42    0.76
  -4 -10  -3   13.49    0.80
   4  10   3   15.44    0.85
  -5 -10  -3   48.62    1.38
  -5 -10  -3   46.87    1.44
   5  10   3   47.55    1.58
  -6 -10  -3    0.61    0.33
  -6 -10  -3   -0.48    0.34
   6  10   3    0.07    0.40
  -7 -10  -3   -0.28    0.35
  -7 -10  -3    0.46    0.33
   7  10   3    0.41    0.47
  -8 -10  -3   -0.18    0.35
  -8 -10  -3    0.04    0.38
   8  10   3   -0.21    0.47
  -9 -10  -3   33.65    1.33
   9  10   3   36.05    1.62
 -10 -10  -3   -0.50    0.39
  10  10   3    1.18    0.61
  11  10   3    0.00    0.55
  12  10   3    1.39    0.68
   9 -11  -3    4.53    0.87
  -9  11   3    3.71    0.82
   8 -11  -3   14.45    1.28
  -8  11   3   14.65    1.20
   7 -11  -3    9.51    0.99
  -7  11   3    7.53    0.88
   6 -11  -3   11.96    1.04
  -6  11   3   12.24    1.02
   5 -11  -3   10.29    0.94
  -5  11   3   10.02    0.94
   4 -11  -3    3.73    0.62
  -4  11   3    4.73    0.70
   3 -11  -3    2.64    0.52
  -3  11   3    2.48    0.53
   2 -11  -3    1.15    0.45
  -2  11   3    0.81    0.42
   1 -11  -3   12.40    0.82
  -1  11   3   13.19    0.48
  -1  11   3   13.18    0.89
   0 -11  -3   36.15    1.26
   0 -11  -3   36.84    1.35
   0  11   3   35.76    0.98
  -1 -11  -3   18.20    0.97
  -1 -11  -3   19.72    0.87
   1  11   3   18.52    0.74
  -2 -11  -3   67.95    1.81
  -2 -11  -3   68.14    1.91
   2  11   3   69.19    1.74
  -3 -11  -3    0.72    0.36
  -3 -11  -3    0.73    0.33
   3  11   3    0.39    0.35
  -4 -11  -3   -0.30    0.29
  -4 -11  -3    0.28    0.36
   4  11   3    0.00    0.36
  -5 -11  -3    9.15    0.75
  -5 -11  -3    9.50    0.63
   5  11   3    9.58    0.78
  -6 -11  -3    7.26    0.58
   6  11   3    5.19    0.66
  -7 -11  -3    0.98    0.38
  -7 -11  -3    0.74    0.42
   7  11   3    0.99    0.53
  -8 -11  -3   34.21    1.33
  -8 -11  -3   35.05    1.22
   8  11   3   34.80    1.51
  -9 -11  -3    0.63    0.47
   9  11   3   -0.15    0.49
 -10 -11  -3    1.94    0.54
  10  11   3    0.65    0.58
  11  11   3    0.37    0.57
  12  11   3    8.64    1.09
   8 -12  -3    3.01    0.79
  -8  12   3    2.86    0.71
   7 -12  -3   -0.91    0.54
  -7  12   3   -0.27    0.53
   6 -12  -3   -0.21    0.50
  -6  12   3    1.12    0.59
   5 -12  -3    7.72    0.85
  -5  12   3    9.99    0.97
   4 -12  -3    2.96    0.66
  -4  12   3    2.42    0.62
   3 -12  -3    5.52    0.71
  -3  12   3    4.55    0.70
   2 -12  -3    1.49    0.53
  -2  12   3    1.57    0.52
   1 -12  -3    3.93    0.60
  -1  12   3    3.53    0.60
   0 -12  -3    0.45    0.41
   0 -12  -3    0.83    0.45
   0  12   3    0.83    0.26
  -1 -12  -3   63.29    1.89
  -1 -12  -3   65.45    1.83
   1  12   3   61.14    1.58
  -2 -12  -3    2.57    0.45
  -2 -12  -3    1.72    0.48
   2  12   3    1.42    0.38
  -3 -12  -3    0.56    0.36
  -3 -12  -3    0.58    0.36
   3  12   3    0.40    0.34
  -4 -12  -3    0.78    0.44
  -4 -12  -3    1.22    0.39
   4  12   3    1.28    0.44
  -5 -12  -3    0.08    0.34
  -5 -12  -3    0.51    0.43
   5  12   3    0.56    0.43
  -6 -12  -3    5.47    0.68
  -6 -12  -3    6.03    0.56
   6  12   3    5.15    0.68
  -7 -12  -3    1.10    0.39
  -7 -12  -3    0.79    0.46
   7  12   3    0.77    0.46
  -8 -12  -3    3.96    0.65
   8  12   3    4.05    0.75
  -9 -12  -3   28.51    1.26
   9  12   3   24.76    1.37
 -10 -12  -3    0.60    0.50
  10  12   3    0.05    0.54
  11  12   3    1.37    0.71
   8 -13  -3    2.71    0.82
  -8  13   3    3.07    0.73
   7 -13  -3    1.52    0.77
  -7  13   3    1.35    0.67
   6 -13  -3    3.32    0.76
  -6  13   3    3.54    0.72
   5 -13  -3    3.10    0.68
  -5  13   3    1.78    0.63
   4 -13  -3   34.37    1.57
  -4  13   3   36.65    1.55
   3 -13  -3   16.76    1.13
  -3  13   3   17.14    1.06
   2 -13  -3    1.15    0.49
  -2  13   3    0.62    0.48
   1 -13  -3    5.63    0.69
  -1  13   3    4.18    0.64
   0 -13  -3    2.16    0.56
   0 -13  -3    1.27    0.48
  -1 -13  -3   11.65    0.89
  -1 -13  -3   12.87    0.79
   1  13   3   12.28    0.69
  -2 -13  -3    1.60    0.43
  -2 -13  -3    2.75    0.55
   2  13   3    2.36    0.42
  -3 -13  -3    2.09    0.53
  -3 -13  -3    2.03    0.46
   3  13   3    2.14    0.46
  -4 -13  -3    1.31    0.48
  -4 -13  -3    1.68    0.42
   4  13   3    0.74    0.45
  -5 -13  -3    2.77    0.55
  -5 -13  -3    2.32    0.46
   5  13   3    2.15    0.52
  -6 -13  -3   13.31    0.78
  -6 -13  -3   13.26    0.92
   6  13   3   13.50    0.94
  -7 -13  -3    0.92    0.47
   7  13   3    1.08    0.58
  -8 -13  -3   15.96    1.01
   8  13   3   16.97    1.18
  -9 -13  -3    0.32    0.48
   9  13   3    0.05    0.53
 -10 -13  -3    2.02    0.61
  10  13   3    1.64    0.70
  11  13   3    0.32    0.63
   7 -14  -3    0.69    0.71
  -7  14   3    1.86    0.65
   6 -14  -3   -0.04    0.60
  -6  14   3    0.54    0.62
   5 -14  -3   15.26    1.22
  -5  14   3   12.39    1.14
   4 -14  -3    2.53    0.68
  -4  14   3    3.62    0.72
   3 -14  -3    0.77    0.58
  -3  14   3    0.54    0.55
   2 -14  -3    8.94    0.91
  -2  14   3    8.30    0.87
   1 -14  -3    9.60    0.85
  -1  14   3   10.85    0.95
   0 -14  -3    9.60    0.83
   0 -14  -3   10.09    0.89
  -1 -14  -3   27.18    1.19
  -1 -14  -3   26.51    1.24
   1  14   3   25.79    0.97
  -2 -14  -3    0.60    0.43
  -2 -14  -3    0.88    0.48
   2  14   3    0.50    0.34
  -3 -14  -3   19.19    0.99
  -3 -14  -3   18.24    1.05
   3  14   3   20.37    0.97
  -4 -14  -3   50.67    1.73
  -4 -14  -3   52.06    1.57
   4  14   3   51.04    1.67
  -5 -14  -3    1.79    0.46
  -5 -14  -3    2.54    0.59
   5  14   3    1.67    0.54
  -6 -14  -3    1.07    0.41
  -6 -14  -3    0.57    0.45
   6  14   3    0.70    0.51
  -7 -14  -3   30.45    1.36
   7  14   3   29.02    1.43
  -8 -14  -3   30.30    1.37
   8  14   3   27.42    1.42
  -9 -14  -3   29.67    1.37
   9  14   3   25.73    1.44
 -10 -14  -3    2.84    0.68
  10  14   3    2.40    0.74
  11  14   3    2.86    0.80
   6 -15  -3    2.09    0.72
  -6  15   3    3.69    0.78
   5 -15  -3    5.88    0.88
  -5  15   3    4.70    0.79
   4 -15  -3    2.42    0.65
  -4  15   3    1.12    0.59
   3 -15  -3    0.18    0.52
  -3  15   3    0.04    0.51
   2 -15  -3    1.58    0.63
  -2  15   3    0.88    0.60
   1 -15  -3    4.73    0.72
  -1  15   3    3.20    0.70
   0 -15  -3   26.57    1.28
   0 -15  -3   21.33    1.17
  -1 -15  -3   24.26    1.19
  -1 -15  -3   25.56    1.32
  -2 -15  -3   35.08    1.35
  -2 -15  -3   36.88    1.49
   2  15   3   35.52    1.25
  -3 -15  -3    1.28    0.48
  -3 -15  -3    1.50    0.58
   3  15   3    1.98    0.50
  -4 -15  -3    7.45    0.84
  -4 -15  -3    8.31    0.73
   4  15   3    7.13    0.75
  -5 -15  -3   19.25    1.09
  -5 -15  -3   18.38    0.94
   5  15   3   18.21    1.08
  -6 -15  -3    1.18    0.52
   6  15   3    1.49    0.60
  -7 -15  -3    2.34    0.61
   7  15   3    3.31    0.71
  -8 -15  -3    0.48    0.54
   8  15   3    1.29    0.64
  -9 -15  -3    0.11    0.53
   9  15   3    0.36    0.62
 -10 -15  -3    4.28    0.76
  10  15   3    2.39    0.74
   6 -16  -3    2.10    0.75
  -6  16   3    2.84    0.78
   5 -16  -3   17.94    1.39
  -5  16   3   17.53    1.36
   4 -16  -3    6.97    0.90
  -4  16   3    6.29    0.86
   3 -16  -3    0.93    0.59
  -3  16   3    0.34    0.57
   2 -16  -3   11.42    1.02
  -2  16   3   12.22    1.09
   1 -16  -3   25.84    1.33
  -1  16   3   27.28    1.40
   0 -16  -3    3.31    0.64
   0  16   3    2.18    0.61
  -1 -16  -3   37.41    1.49
  -1 -16  -3   38.12    1.64
  -2 -16  -3    6.22    0.73
  -2 -16  -3    7.17    0.88
  -3 -16  -3    0.59    0.44
  -3 -16  -3   -0.45    0.45
   3  16   3    1.70    0.49
  -4 -16  -3   10.42    1.01
  -4 -16  -3    9.24    0.79
   4  16   3    9.26    0.84
  -5 -16  -3   11.20    1.02
   5  16   3   13.13    1.00
  -6 -16  -3    0.00    0.51
   6  16   3   -0.35    0.48
  -7 -16  -3    0.29    0.56
   7  16   3    0.96    0.59
  -8 -16  -3   14.29    1.15
   8  16   3   15.61    1.26
  -9 -16  -3    2.96    0.68
   9  16   3    2.26    0.75
 -10 -16  -3    3.47    0.74
  10  16   3    5.08    0.94
   5 -17  -3    0.11    0.58
  -5  17   3    0.41    0.60
   4 -17  -3    1.30    0.72
  -4  17   3    0.90    0.62
   3 -17  -3   -0.32    0.58
  -3  17   3    0.07    0.51
  -2  17   3    2.35    0.67
   1 -17  -3   49.02    1.86
  -1  17   3   46.87    1.86
   0 -17  -3    9.26    0.92
   0  17   3    8.71    0.98
  -1 -17  -3   -0.26    0.45
  -1 -17  -3    1.02    0.59
  -2 -17  -3   13.45    0.96
  -2 -17  -3   14.32    1.17
  -3 -17  -3    3.06    0.58
  -3 -17  -3    3.33    0.71
  -4 -17  -3    2.00    0.51
  -4 -17  -3    1.82    0.63
   4  17   3    1.35    0.53
  -5 -17  -3   16.50    1.25
   5  17   3   14.04    1.08
  -6 -17  -3   13.41    1.14
   6  17   3   12.60    1.09
  -7 -17  -3    1.36    0.63
   7  17   3    1.57    0.64
  -8 -17  -3    2.14    0.63
   8  17   3   -0.74    0.55
  -9 -17  -3   -0.02    0.53
   9  17   3   -0.09    0.62
   4 -18  -3    1.84    0.70
  -4  18   3    0.31    0.57
   3 -18  -3    2.54    0.74
  -3  18   3    2.05    0.70
   2 -18  -3   12.43    1.11
  -2  18   3   12.38    1.16
   1 -18  -3    0.59    0.59
  -1  18   3   -0.20    0.56
   0 -18  -3   -0.09    0.51
   0  18   3    0.26    0.57
  -1 -18  -3   13.91    1.08
  -1 -18  -3   12.07    1.13
  -2 -18  -3   -0.40    0.53
  -2 -18  -3    0.05    0.45
  -3 -18  -3    4.27    0.64
  -3 -18  -3    4.99    0.83
  -4 -18  -3    5.11    0.84
   4  18   3    6.05    0.76
  -5 -18  -3   20.42    1.32
   5  18   3   22.44    1.29
  -6 -18  -3    0.20    0.52
   6  18   3    0.32    0.55
  -7 -18  -3    2.22    0.68
   7  18   3    2.39    0.71
  -8 -18  -3    1.99    0.67
   8  18   3    1.41    0.70
   2 -19  -3    2.35    0.70
  -2  19   3    2.92    0.75
   1 -19  -3    6.60    0.86
  -1  19   3    6.57    0.93
   0 -19  -3    1.87    0.63
   0  19   3    2.03    0.69
  -1 -19  -3   -0.71    0.50
  -1 -19  -3    1.06    0.65
  -2 -19  -3   31.03    1.64
  -2 -19  -3   31.73    1.44
  -3 -19  -3    1.71    0.70
  -3 -19  -3    2.38    0.61
  -4 -19  -3    1.32    0.67
  -5 -19  -3   10.64    1.07
   5  19   3    9.26    0.94
  -6 -19  -3   32.40    1.65
   6  19   3   32.29    1.54
  -7 -19  -3    9.74    1.04
   7  19   3    7.59    0.97
   1 -20  -3    0.44    0.60
  -1  20   3    0.26    0.63
   0 -20  -3    0.50    0.55
   0  20   3    0.05    0.62
  -1 -20  -3    1.32    0.56
   1  20   3    0.65    0.59
  -2 -20  -3    0.65    0.52
  -2 -20  -3    0.81    0.67
  -3 -20  -3   14.54    1.32
  -4 -20  -3    0.18    0.60
  -5 -20  -3    1.22    0.73
  -6 -20  -3    2.88    0.77
   6  20   3    2.71    0.67
   5  19  -4   -0.43    0.58
  -5 -19   4   -0.09    0.58
   4  19  -4    1.36    0.68
  -4 -19   4    2.91    0.83
   3  19  -4    4.67    0.80
  -3 -19   4    3.43    0.87
  -2 -19   4    5.40    0.97
  -1 -19   4    6.05    0.99
   0 -19   4    3.67    0.88
   7  18  -4    1.19    0.66
  -7 -18   4    1.81    0.73
   6  18  -4    9.98    1.10
  -6 -18   4    8.84    1.08
   5  18  -4    8.74    1.05
  -5 -18   4   10.28    1.10
   4  18  -4    2.23    0.71
  -4 -18   4    1.59    0.71
   3  18  -4    0.02    0.53
  -3 -18   4    0.60    0.65
   2  18  -4    2.28    0.64
  -2 -18   4    2.32    0.76
  -1 -18   4   14.45    1.28
   0 -18   4    4.91    0.87
   1 -18   4    0.51    0.54
   1 -18   4    1.46    0.75
  -2  18  -4    3.95    0.81
   2 -18   4    4.22    0.78
   8  17  -4    2.16    0.87
  -8 -17   4    2.70    0.79
   7  17  -4    0.18    0.60
  -7 -17   4    0.21    0.55
   6  17  -4    3.70    0.79
  -6 -17   4    4.10    0.80
   5  17  -4    0.47    0.59
  -5 -17   4   -0.49    0.54
   4  17  -4    7.35    0.90
  -4 -17   4    5.71    0.90
   3  17  -4   28.58    1.43
  -3 -17   4   28.90    1.51
   2  17  -4   -0.12    0.52
  -2 -17   4    0.54    0.63
   1  17  -4    0.54    0.52
  -1 -17   4    1.19    0.67
   0 -17   4   24.59    1.45
   0 -17   4   24.76    1.19
   1 -17   4    0.25    0.55
   1 -17   4    1.04    0.63
   2 -17   4   -0.76    0.61
   2 -17   4   -0.25    0.56
  -3  17  -4   20.14    1.29
   3 -17   4   18.64    1.27
   9  16  -4    0.54    0.77
  -9 -16   4    2.11    0.72
   8  16  -4    0.77    0.68
  -8 -16   4    1.11    0.71
   7  16  -4    0.77    0.64
  -7 -16   4    0.16    0.61
   6  16  -4    4.03    0.78
  -6 -16   4    6.21    0.90
   5  16  -4   -0.47    0.54
  -5 -16   4    0.68    0.59
   4  16  -4   16.26    1.12
  -4 -16   4   13.58    1.21
   3  16  -4   15.83    1.09
  -3 -16   4   14.78    1.21
   2  16  -4    4.55    0.72
  -2 -16   4    4.30    0.79
   1  16  -4   -0.42    0.46
  -1 -16   4   -0.37    0.54
   0 -16   4   57.06    1.84
   0 -16   4   54.24    2.04
   1 -16   4    0.81    0.50
   1 -16   4    1.17    0.67
   2 -16   4    7.66    0.86
   2 -16   4    6.39    0.86
  -3  16  -4    1.00    0.59
   3 -16   4    0.48    0.57
  -4  16  -4    1.64    0.65
   4 -16   4    0.78    0.63
  -5  16  -4    1.19    0.59
   5 -16   4    0.72    0.81
   9  15  -4    0.86    0.62
  -9 -15   4    0.17    0.63
   8  15  -4    0.68    0.61
  -8 -15   4    0.92    0.57
   7  15  -4   19.61    1.34
  -7 -15   4   21.16    1.29
   6  15  -4    3.52    0.77
  -6 -15   4    3.43    0.77
   5  15  -4    0.24    0.54
  -5 -15   4    0.16    0.49
   4  15  -4   32.18    1.44
   3  15  -4    3.47    0.68
  -3 -15   4    3.20    0.70
   2  15  -4   12.91    0.98
  -2 -15   4   11.81    1.07
   1  15  -4    0.18    0.43
  -1 -15   4    0.17    0.41
  -1 -15   4    0.10    0.51
   0  15  -4    0.09    0.40
   0 -15   4    0.12    0.40
   0 -15   4    0.21    0.54
   1 -15   4    3.14    0.71
   1 -15   4    3.62    0.64
   2 -15   4    2.96    0.62
   2 -15   4    3.16    0.71
  -3  15  -4   12.93    1.10
   3 -15   4   14.49    1.16
  -4  15  -4   -0.06    0.52
   4 -15   4    0.14    0.63
  -5  15  -4    4.88    0.77
   5 -15   4    4.69    0.85
  10  14  -4    0.44    0.73
 -10 -14   4    2.28    0.70
   9  14  -4   -0.22    0.61
  -9 -14   4   -0.32    0.60
   8  14  -4    7.63    0.98
  -8 -14   4    6.89    0.88
   7  14  -4    1.36    0.66
  -7 -14   4    2.23    0.66
   6  14  -4    2.19    0.64
  -6 -14   4    1.95    0.65
   5  14  -4   13.27    1.10
  -5 -14   4   15.66    1.08
   4  14  -4    0.16    0.51
  -4 -14   4   -0.14    0.52
   3  14  -4   60.29    1.97
  -3 -14   4   60.83    2.03
   2  14  -4    5.61    0.71
  -2 -14   4    6.47    0.81
   1  14  -4    1.31    0.48
  -1 -14   4    1.49    0.56
  -1 -14   4    1.73    0.44
   0  14  -4    0.12    0.42
   0 -14   4   -0.08    0.39
   0 -14   4   -0.36    0.47
  -1  14  -4    0.27    0.43
   1 -14   4    0.20    0.45
   1 -14   4    1.99    0.62
   2 -14   4    6.64    0.80
   2 -14   4    6.66    0.94
  -3  14  -4    6.52    0.80
   3 -14   4    6.26    0.81
  -4  14  -4    4.42    0.74
   4 -14   4    1.93    0.64
  -5  14  -4    0.30    0.53
   5 -14   4   -0.32    0.56
  -6  14  -4    0.59    0.56
   6 -14   4    1.16    0.89
  10  13  -4    3.00    0.85
 -10 -13   4    2.00    0.72
   9  13  -4    1.04    0.60
  -9 -13   4    2.03    0.68
   8  13  -4   -0.20    0.53
  -8 -13   4   -0.11    0.56
   7  13  -4    1.06    0.64
  -7 -13   4    1.10    0.55
   6  13  -4   -0.45    0.51
  -6 -13   4    0.08    0.45
   5  13  -4    0.83    0.55
  -5 -13   4    0.83    0.50
   4  13  -4    1.63    0.57
  -4 -13   4    1.35    0.54
   3  13  -4    0.21    0.45
  -3 -13   4   -0.73    0.43
   2  13  -4    2.58    0.54
  -2 -13   4    3.04    0.61
  -2 -13   4    3.09    0.42
   1  13  -4    3.65    0.59
  -1 -13   4    2.11    0.58
  -1 -13   4    3.77    0.50
   0  13  -4    8.00    0.72
   0 -13   4    6.67    0.68
   0 -13   4    6.56    0.78
  -1  13  -4   -0.05    0.36
   1 -13   4   -0.62    0.46
   1 -13   4    0.08    0.39
  -2  13  -4    9.78    0.76
   2 -13   4   10.73    0.90
   2 -13   4   11.62    0.95
  -3  13  -4    8.50    0.86
   3 -13   4    8.27    0.92
  -4  13  -4   19.02    1.14
   4 -13   4   19.72    1.21
  -5  13  -4    0.25    0.46
   5 -13   4   -0.54    0.50
  -6  13  -4    0.50    0.50
   6 -13   4    0.00    0.61
  -7  13  -4   -0.60    0.57
   7 -13   4   -0.06    0.58
  11  12  -4    1.85    0.73
 -11 -12   4    1.70    0.65
  10  12  -4    2.47    0.83
 -10 -12   4    3.24    0.78
   9  12  -4   10.89    1.12
  -9 -12   4   12.92    1.13
   8  12  -4    4.11    0.75
  -8 -12   4    3.97    0.72
   7  12  -4    6.13    0.82
  -7 -12   4    3.50    0.66
   6  12  -4   30.68    1.44
  -6 -12   4   26.61    1.37
   5  12  -4    8.37    0.82
  -5 -12   4    7.71    0.81
   4  12  -4    0.57    0.45
  -4 -12   4    0.01    0.43
   3  12  -4   12.43    0.92
  -3 -12   4   14.48    1.04
   2  12  -4    8.48    0.76
  -2 -12   4    8.91    0.56
  -2 -12   4    7.18    0.74
   1  12  -4   38.93    1.39
  -1 -12   4   39.12    1.24
  -1 -12   4   40.42    1.50
   0  12  -4   79.46    2.12
   0 -12   4   79.40    2.08
   0 -12   4   77.43    2.23
  -1  12  -4    5.75    0.61
   1 -12   4    3.58    0.65
   1 -12   4    6.12    0.65
   2 -12   4    0.79    0.43
   2 -12   4    1.19    0.47
   2 -12   4    1.02    0.40
  -3  12  -4   19.31    1.05
   3 -12   4   22.04    1.19
   3 -12   4   21.49    0.95
  -4  12  -4    8.38    0.85
   4 -12   4    8.07    0.87
  -5  12  -4   -0.13    0.48
   5 -12   4   -0.17    0.58
  -6  12  -4    3.58    0.67
   6 -12   4    2.93    0.78
   7 -12   4    5.99    0.94
   8 -12   4    3.59    0.87
  11  11  -4   -0.87    0.63
 -11 -11   4    0.84    0.73
  10  11  -4    8.62    1.04
 -10 -11   4   12.70    1.13
   9  11  -4    2.02    0.73
  -9 -11   4    2.79    0.65
   8  11  -4    0.58    0.55
  -8 -11   4   -0.24    0.49
   7  11  -4    5.89    0.81
  -7 -11   4    5.37    0.73
   6  11  -4   -0.45    0.40
  -6 -11   4    0.23    0.44
   5  11  -4    2.65    0.58
  -5 -11   4    4.30    0.65
   4  11  -4   24.01    1.19
   3  11  -4    2.42    0.53
  -3 -11   4    1.96    0.28
  -3 -11   4    2.18    0.51
   2  11  -4   10.64    0.82
  -2 -11   4   11.94    0.83
  -2 -11   4   12.80    0.62
   1  11  -4    4.89    0.57
  -1 -11   4    4.75    0.64
  -1 -11   4    4.98    0.48
   0  11  -4   42.54    1.39
   0 -11   4   38.96    1.42
   0 -11   4   40.99    1.31
   1 -11   4    4.33    0.65
   1 -11   4    4.40    0.53
   1 -11   4    5.68    0.60
   2 -11   4   15.01    0.93
   2 -11   4   16.81    0.94
   2 -11   4   15.37    0.77
  -3  11  -4    0.39    0.41
   3 -11   4    0.13    0.35
   3 -11   4   -0.62    0.40
  -4  11  -4    0.92    0.49
   4 -11   4    0.99    0.55
   4 -11   4    1.70    0.42
  -5  11  -4    0.15    0.46
   5 -11   4    0.79    0.57
  -6  11  -4   -0.26    0.51
   6 -11   4   -0.47    0.49
  -7  11  -4    5.35    0.76
   7 -11   4    4.57    0.90
   8 -11   4    0.53    0.63
  11  10  -4   -0.12    0.60
 -11 -10   4    0.23    0.54
  10  10  -4   -0.06    0.60
 -10 -10   4    1.09    0.57
   9  10  -4   15.09    1.24
  -9 -10   4   17.34    1.19
   8  10  -4   -0.15    0.48
  -8 -10   4    0.62    0.53
   7  10  -4    9.06    0.89
  -7 -10   4    8.13    0.83
   6  10  -4   43.40    1.62
  -6 -10   4   44.23    1.63
   5  10  -4    7.93    0.79
  -5 -10   4    9.42    0.81
   4  10  -4   12.63    0.85
  -4 -10   4   12.07    0.91
   3  10  -4   17.08    0.92
  -3 -10   4   19.37    1.02
  -3 -10   4   17.43    0.58
   2  10  -4    2.56    0.48
  -2 -10   4    3.65    0.39
  -2 -10   4    3.18    0.55
   1  10  -4   24.74    1.03
  -1 -10   4   24.03    0.86
  -1 -10   4   21.50    1.01
   0  10  -4  118.64    2.80
   0 -10   4  122.42    2.91
   0 -10   4  122.76    2.77
   1 -10   4    0.15    0.31
   1 -10   4   -0.12    0.31
   1 -10   4   -0.37    0.31
   2 -10   4   -0.11    0.39
   2 -10   4    0.37    0.34
   2 -10   4    0.46    0.41
  -3  10  -4   32.05    1.27
   3 -10   4   32.28    1.12
   3 -10   4   31.65    1.29
   3 -10   4   32.42    1.23
  -4  10  -4   10.77    0.85
   4 -10   4   10.37    0.89
   4 -10   4   11.24    0.74
  -5  10  -4    9.01    0.81
   5 -10   4    8.99    0.91
   5 -10   4    9.95    0.71
  -6  10  -4   15.37    0.98
   6 -10   4   16.08    1.24
  -7  10  -4   12.48    0.98
   7 -10   4   11.32    1.12
  -8  10  -4    4.77    0.73
   8 -10   4    4.62    0.87
   9 -10   4    0.04    0.63
  11   9  -4    7.73    1.05
 -11  -9   4    7.55    0.91
  10   9  -4    4.16    0.84
 -10  -9   4    5.19    0.78
   9   9  -4    1.38    0.67
  -9  -9   4    0.97    0.57
   8   9  -4   11.06    1.00
  -8  -9   4   10.61    0.95
   7   9  -4    3.12    0.62
  -7  -9   4    3.86    0.65
   6   9  -4    0.90    0.46
  -6  -9   4    0.97    0.45
   5   9  -4   25.22    1.21
  -5  -9   4   25.02    1.11
   4   9  -4   45.79    1.55
  -4  -9   4   46.57    1.56
   3   9  -4   17.22    0.94
  -3  -9   4   14.91    0.84
  -3  -9   4   16.66    0.52
   2   9  -4   11.32    0.78
  -2  -9   4   11.47    0.51
  -2  -9   4   11.78    0.76
   1   9  -4   17.14    0.87
  -1  -9   4   17.77    0.69
  -1  -9   4   18.70    0.93
   0   9  -4    5.42    0.54
   0  -9   4    4.47    0.49
   0  -9   4    4.17    0.53
   0  -9   4    5.79    0.49
   1  -9   4   11.99    0.68
   1  -9   4   10.69    0.70
   1  -9   4   11.45    0.78
   2  -9   4    1.52    0.36
   2  -9   4    1.71    0.44
   2  -9   4    1.57    0.39
   3  -9   4    5.21    0.60
   3  -9   4    4.64    0.51
   3  -9   4    4.49    0.60
  -4   9  -4    4.16    0.58
   4  -9   4    4.38    0.63
   4  -9   4    3.12    0.47
  -5   9  -4    1.62    0.49
   5  -9   4    1.75    0.58
   5  -9   4    1.67    0.43
  -6   9  -4   11.40    0.89
   6  -9   4   10.88    1.04
   6  -9   4   11.97    0.81
  -7   9  -4    9.28    0.84
   7  -9   4    8.37    0.96
  -8   9  -4    0.73    0.53
   8  -9   4    1.23    0.70
   9  -9   4    5.35    0.94
  12   8  -4   15.79    1.41
 -12  -8   4   17.25    1.18
  11   8  -4    2.14    0.73
 -11  -8   4    0.16    0.53
  10   8  -4    0.05    0.55
 -10  -8   4    0.19    0.50
   9   8  -4    9.00    0.95
  -9  -8   4    9.41    0.89
   8   8  -4    4.29    0.73
  -8  -8   4    3.30    0.63
   7   8  -4    0.88    0.45
  -7  -8   4    1.47    0.47
   6   8  -4   10.70    0.86
  -6  -8   4    9.55    0.82
   5   8  -4    0.69    0.46
  -5  -8   4    0.36    0.37
   4   8  -4   14.67    0.85
  -4  -8   4   17.34    0.93
   3   8  -4   22.60    0.98
  -3  -8   4   22.58    0.57
  -3  -8   4   22.32    0.98
   2   8  -4    1.00    0.37
  -2  -8   4    0.94    0.21
  -2  -8   4    1.07    0.35
   1   8  -4   13.53    0.77
  -1  -8   4   13.59    0.78
  -1  -8   4   12.11    0.58
   0  -8   4   21.58    0.87
   0  -8   4   20.46    0.87
   0  -8   4   20.85    0.78
   1  -8   4    1.93    0.40
   1  -8   4    0.93    0.37
   1  -8   4    0.97    0.34
   2  -8   4    1.61    0.40
   2  -8   4    1.91    0.37
   2  -8   4    2.81    0.47
   3  -8   4    7.44    0.57
   3  -8   4    6.58    0.60
   3  -8   4    6.87    0.66
  -4   8  -4    1.68    0.44
   4  -8   4    2.21    0.41
   4  -8   4    3.50    0.57
  -5   8  -4   21.30    1.00
   5  -8   4   22.47    1.14
   5  -8   4   20.56    0.93
  -6   8  -4   19.06    0.99
   6  -8   4   17.57    0.90
   6  -8   4   16.53    1.10
  -7   8  -4    1.60    0.51
   7  -8   4    2.11    0.68
   7  -8   4    2.67    0.51
  -8   8  -4    1.20    0.55
   8  -8   4    1.56    0.64
   9  -8   4    5.22    0.94
  10  -8   4    6.93    1.03
  12   7  -4   -0.42    0.55
 -12  -7   4    0.61    0.57
  11   7  -4    2.68    0.76
 -11  -7   4    0.35    0.52
  10   7  -4    5.75    0.87
 -10  -7   4    5.17    0.77
   9   7  -4    9.97    0.95
  -9  -7   4    9.25    0.89
   8   7  -4    4.27    0.69
  -8  -7   4    4.29    0.67
   7   7  -4    0.25    0.47
  -7  -7   4   -0.20    0.36
   6   7  -4    3.61    0.58
  -6  -7   4    4.24    0.57
   5   7  -4    0.45    0.38
  -5  -7   4    0.33    0.34
   4   7  -4   17.72    0.93
  -4  -7   4   15.65    0.90
   3   7  -4   11.23    0.76
  -3  -7   4   11.32    0.69
   2   7  -4    8.79    0.63
  -2  -7   4    8.26    0.63
  -2  -7   4    9.34    0.39
   1   7  -4    2.19    0.38
  -1  -7   4    2.24    0.41
  -1  -7   4    1.95    0.29
   0  -7   4    0.55    0.27
   0  -7   4    0.88    0.32
   0  -7   4    0.85    0.32
   1  -7   4    1.43    0.35
   1  -7   4    1.64    0.35
   1  -7   4    1.46    0.32
   2  -7   4    8.15    0.60
   2  -7   4    7.74    0.62
   2  -7   4    8.99    0.60
  -3   7  -4   57.39    1.58
   3  -7   4   58.99    1.72
   3  -7   4   57.35    1.53
  -4   7  -4    0.67    0.34
   4  -7   4    0.64    0.41
   4  -7   4    0.04    0.30
  -5   7  -4    1.71    0.45
   5  -7   4    0.67    0.46
   5  -7   4    1.52    0.40
  -6   7  -4   16.44    0.93
   6  -7   4   18.40    0.92
   6  -7   4   16.30    1.04
  -7   7  -4    8.30    0.76
   7  -7   4    5.93    0.84
   7  -7   4    7.61    0.70
  -8   7  -4    7.24    0.76
   8  -7   4    6.24    0.67
   8  -7   4    5.33    0.87
   9  -7   4    0.67    0.60
  10  -7   4   16.50    1.41
  12   6  -4    0.72    0.67
 -12  -6   4    0.94    0.60
  11   6  -4    0.12    0.57
 -11  -6   4    0.45    0.55
  10   6  -4    0.70    0.53
 -10  -6   4    0.14    0.45
   9   6  -4   18.48    1.13
  -9  -6   4   17.59    1.08
   8   6  -4    0.23    0.46
  -8  -6   4    1.07    0.49
   7   6  -4    5.26    0.68
  -7  -6   4    5.99    0.69
   6   6  -4   36.34    1.38
  -6  -6   4   35.52    1.29
   5   6  -4   21.07    0.98
  -5  -6   4   20.91    0.97
   4   6  -4    6.71    0.62
  -4  -6   4    6.65    0.61
   3   6  -4   33.86    1.18
  -3  -6   4   34.45    1.14
   2   6  -4    0.41    0.33
  -2  -6   4    0.32    0.30
  -2  -6   4    0.18    0.14
   1   6  -4   -0.25    0.30
  -1  -6   4    0.11    0.28
  -1  -6   4    0.14    0.21
   0  -6   4    1.90    0.36
   0  -6   4    1.15    0.35
   0  -6   4    1.84    0.31
   1  -6   4   -0.13    0.28
   1  -6   4   -0.03    0.27
   1  -6   4   -0.21    0.26
   2  -6   4    0.95    0.37
   2  -6   4    0.73    0.32
   2  -6   4    1.12    0.31
  -3   6  -4   24.54    0.90
   3  -6   4   25.42    1.01
   3  -6   4   23.77    0.90
  -4   6  -4   27.68    1.01
   4  -6   4   27.63    0.99
   4  -6   4   26.76    1.12
  -5   6  -4    4.09    0.49
   5  -6   4    4.99    0.53
   5  -6   4    5.14    0.67
  -6   6  -4   28.48    1.10
   6  -6   4   29.28    1.33
   6  -6   4   27.75    1.08
  -7   6  -4    0.22    0.42
   7  -6   4   -0.05    0.39
   7  -6   4    0.04    0.53
  -8   6  -4    0.56    0.45
   8  -6   4    1.25    0.48
   8  -6   4    1.78    0.66
   9  -6   4    7.14    0.94
   9  -6   4    8.61    0.82
  10  -6   4    0.48    0.64
  12   5  -4    2.13    0.72
 -12  -5   4    2.19    0.66
  11   5  -4    2.27    0.70
 -11  -5   4    2.50    0.67
  10   5  -4   22.19    1.30
 -10  -5   4   19.99    1.19
   9   5  -4    2.86    0.64
  -9  -5   4    3.71    0.64
   8   5  -4    1.22    0.50
  -8  -5   4    2.36    0.57
   7   5  -4   60.89    1.85
  -7  -5   4   59.81    1.80
  -7  -5   4   59.91    1.42
   6   5  -4   -0.47    0.36
  -6  -5   4    0.15    0.17
  -6  -5   4    0.63    0.39
   5   5  -4    7.33    0.64
  -5  -5   4    7.71    0.30
  -5  -5   4    7.16    0.64
   4   5  -4   99.86    2.39
  -4  -5   4   99.28    2.35
   3   5  -4   38.57    1.21
  -3  -5   4   39.02    1.22
   2   5  -4    0.59    0.32
  -2  -5   4    0.23    0.29
  -1  -5   4    0.43    0.30
  -1  -5   4    0.86    0.20
  -1  -5   4    0.78    0.32
   0  -5   4    1.42    0.35
   0  -5   4    1.32    0.31
   0  -5   4    1.37    0.28
   1  -5   4    1.82    0.35
   1  -5   4    2.19    0.37
   1  -5   4    3.01    0.39
   2  -5   4   62.92    1.66
   2  -5   4   66.00    1.61
   2  -5   4   65.32    1.57
  -3   5  -4    0.60    0.29
   3  -5   4    0.41    0.35
   3  -5   4    0.51    0.29
  -4   5  -4    3.48    0.42
   4  -5   4    3.21    0.42
   4  -5   4    3.38    0.51
  -5   5  -4   17.38    0.81
   5  -5   4   18.29    0.96
   5  -5   4   19.35    0.86
  -6   5  -4    0.96    0.38
   6  -5   4    0.30    0.47
   6  -5   4    1.09    0.37
  -7   5  -4    2.05    0.45
   7  -5   4    1.90    0.56
   7  -5   4    2.00    0.50
  -8   5  -4   10.68    0.81
   8  -5   4    9.84    0.99
   8  -5   4   12.51    0.85
   9  -5   4    1.12    0.52
   9  -5   4    1.56    0.67
  10  -5   4    5.76    0.94
  11  -5   4    0.45    0.60
  12   4  -4    3.98    0.86
  11   4  -4    1.50    0.66
 -11  -4   4    1.93    0.65
  10   4  -4   10.47    1.01
 -10  -4   4    7.90    0.89
   9   4  -4   12.97    1.03
  -9  -4   4   13.31    0.93
   8   4  -4    1.30    0.47
   8   4  -4    0.59    0.34
  -8  -4   4    0.99    0.49
   7   4  -4   15.33    0.91
   7   4  -4   15.74    0.64
  -7  -4   4   14.77    0.92
   6   4  -4   26.45    1.14
   6   4  -4   28.16    0.80
  -6  -4   4   27.62    1.13
   5   4  -4   23.23    0.64
   5   4  -4   24.34    1.02
  -5  -4   4   24.26    0.96
   4   4  -4   10.41    0.70
  -4  -4   4    8.85    0.62
   3   4  -4  216.23    4.49
  -3  -4   4  222.11    4.43
   2   4  -4   18.63    0.79
  -2  -4   4   18.45    0.74
  -1  -4   4    9.16    0.41
  -1  -4   4    9.90    0.56
  -1  -4   4   10.72    0.55
   0  -4   4   10.15    0.49
   0  -4   4    9.62    0.51
   0  -4   4   10.98    0.62
   1  -4   4    8.15    0.53
   1  -4   4    6.87    0.49
   1  -4   4    7.25    0.48
   2  -4   4    0.44    0.26
   2  -4   4    0.66    0.30
   2  -4   4    0.91    0.29
  -3   4  -4   39.76    1.10
   3  -4   4   41.77    1.20
  -4   4  -4    1.68    0.32
   4  -4   4    1.37    0.35
   4  -4   4    0.73    0.36
  -5   4  -4    9.86    0.60
   5  -4   4    8.78    0.66
   5  -4   4   10.76    0.77
  -6   4  -4    1.43    0.37
   6  -4   4    1.23    0.41
   6  -4   4    1.01    0.45
  -7   4  -4   11.64    0.74
   7  -4   4   10.93    0.81
   7  -4   4   13.36    1.02
  -8   4  -4    4.06    0.53
   8  -4   4    3.59    0.73
   8  -4   4    2.52    0.53
   9  -4   4    8.36    0.98
   9  -4   4    7.78    0.79
  10  -4   4    0.14    0.59
  10  -4   4   -0.77    0.41
  11  -4   4    0.48    0.67
  12   3  -4    0.94    0.66
 -12  -3   4    1.94    0.65
  11   3  -4    4.71    0.76
 -11  -3   4    6.14    0.84
  10   3  -4    7.17    0.85
 -10  -3   4    6.77    0.81
   9   3  -4    8.27    0.69
   9   3  -4    8.63    0.86
  -9  -3   4   11.50    0.95
   8   3  -4   16.17    0.76
   8   3  -4   13.80    0.91
  -8  -3   4   13.95    0.91
   7   3  -4   47.80    1.57
   7   3  -4   47.59    1.29
  -7  -3   4   46.91    1.57
   6   3  -4    0.65    0.36
   6   3  -4    0.56    0.25
  -6  -3   4    1.28    0.41
   5   3  -4   16.18    0.58
   5   3  -4   17.68    0.88
  -5  -3   4   17.53    0.81
   4   3  -4  139.60    3.07
   4   3  -4  140.23    2.75
  -4  -3   4  143.47    3.08
   3   3  -4    1.99    0.37
  -3  -3   4    2.46    0.38
   2   3  -4   19.74    0.82
  -2  -3   4   21.55    0.78
   1   3  -4    5.57    0.34
  -1  -3   4    5.94    0.45
  -1  -3   4    5.56    0.44
   0  -3   4    7.27    0.45
   0  -3   4    6.22    0.42
   0  -3   4    6.22    0.45
   1  -3   4   33.73    0.96
   1  -3   4   33.94    0.89
   1  -3   4   32.67    0.99
   2  -3   4    2.37    0.34
   2  -3   4    2.15    0.35
   2  -3   4    2.88    0.31
  -3   3  -4   37.31    1.00
   3  -3   4   38.37    1.14
   3  -3   4   36.90    1.16
  -4   3  -4    7.00    0.47
   4  -3   4    6.18    0.53
   4  -3   4    7.13    0.64
  -5   3  -4   11.80    0.63
   5  -3   4   10.66    0.70
   5  -3   4   13.81    0.85
  -6   3  -4    0.04    0.29
   6  -3   4    0.19    0.30
   6  -3   4   -0.01    0.36
  -7   3  -4    0.14    0.33
   7  -3   4    0.05    0.46
   7  -3   4    0.02    0.38
  -8   3  -4    7.46    0.64
   8  -3   4    6.34    0.77
   8  -3   4    7.13    0.71
   9  -3   4   12.52    0.98
   9  -3   4   13.30    1.12
  10  -3   4   -0.45    0.49
  10  -3   4   -0.25    0.55
  11  -3   4    3.07    0.70
  11  -3   4    3.36    0.79
  12   2  -4    2.48    0.66
  11   2  -4    3.89    0.74
 -11  -2   4    2.34    0.68
  10   2  -4    1.60    0.61
 -10  -2   4    1.64    0.57
   9   2  -4   27.30    1.13
   9   2  -4   25.34    1.25
  -9  -2   4   27.38    1.30
   8   2  -4   32.45    1.16
   8   2  -4   33.36    1.30
  -8  -2   4   34.54    1.37
   7   2  -4   38.28    1.17
   7   2  -4   39.28    1.37
  -7  -2   4   36.23    1.33
   6   2  -4   46.60    1.44
   6   2  -4   44.84    1.22
  -6  -2   4   46.93    1.47
   5   2  -4    8.47    0.63
   5   2  -4    8.34    0.47
  -5  -2   4    9.68    0.64
   4   2  -4    4.16    0.44
   4   2  -4    4.17    0.30
  -4  -2   4    3.17    0.46
   3   2  -4   95.23    2.16
   3   2  -4   95.68    1.90
  -3  -2   4   93.85    2.15
   2   2  -4  102.01    2.00
   2   2  -4  103.90    2.25
  -2  -2   4  104.29    2.24
   1   2  -4  229.47    4.38
  -1  -2   4  230.45    4.47
  -1  -2   4  235.26    4.56
   0   2  -4   39.99    0.98
   0  -2   4   40.59    0.99
   1  -2   4    6.23    0.43
   1  -2   4    6.94    0.48
   1  -2   4    6.78    0.40
   2  -2   4    0.42    0.20
   2  -2   4   -0.24    0.28
   2  -2   4   -0.05    0.27
  -3   2  -4  227.66    4.37
   3  -2   4  232.19    4.64
  -4   2  -4    7.74    0.45
   4  -2   4    8.26    0.58
   4  -2   4    7.84    0.61
  -5   2  -4   49.78    1.24
   5  -2   4   50.72    1.55
   5  -2   4   49.05    1.44
  -6   2  -4   60.26    1.52
   6  -2   4   61.06    1.71
  -7   2  -4    1.75    0.38
   7  -2   4    1.99    0.46
   7  -2   4    2.44    0.56
  -8   2  -4    0.47    0.36
   8  -2   4   -0.18    0.47
   8  -2   4   -0.37    0.33
   9  -2   4    2.93    0.67
   9  -2   4    4.15    0.67
  10  -2   4    4.14    0.67
  10  -2   4    4.22    0.78
  11  -2   4   12.06    1.18
  11  -2   4   11.53    1.02
  12   1  -4    1.73    0.62
 -12  -1   4    1.33    0.64
  11   1  -4   -0.33    0.46
 -11  -1   4    0.28    0.55
  10   1  -4   10.10    0.94
  10   1  -4    9.78    0.86
 -10  -1   4    8.79    0.92
   9   1  -4    4.86    0.67
  -9  -1   4    5.74    0.73
   8   1  -4    0.53    0.38
   8   1  -4   -0.12    0.41
  -8  -1   4    0.15    0.44
   7   1  -4    1.88    0.39
   7   1  -4    1.62    0.43
  -7  -1   4    1.21    0.44
   6   1  -4    0.38    0.34
   6   1  -4    1.11    0.31
  -6  -1   4    1.12    0.40
   5   1  -4   19.82    0.72
   5   1  -4   19.43    0.81
  -5  -1   4   19.56    0.89
   4   1  -4    7.99    0.46
   4   1  -4    6.71    0.52
  -4  -1   4    7.36    0.57
   3   1  -4    2.24    0.26
   3   1  -4    2.10    0.36
  -3  -1   4    1.93    0.35
   2   1  -4    0.36    0.19
   2   1  -4    0.07    0.26
  -2  -1   4    0.29    0.27
   1   1  -4   92.33    1.88
  -1  -1   4   92.63    1.96
  -1  -1   4   97.78    2.03
   0   1  -4   30.76    0.84
   0  -1   4   32.89    0.93
   0  -1   4   33.14    0.81
  -1   1  -4  329.67    6.33
   1  -1   4  328.29    6.34
   1  -1   4  332.33    6.08
   2  -1   4  306.05    5.73
   2  -1   4  304.02    6.03
   2  -1   4  324.36    6.08
  -3   1  -4    0.96    0.19
   3  -1   4    0.40    0.32
   3  -1   4    0.24    0.30
  -4   1  -4   93.62    1.92
   4  -1   4   92.78    2.17
   4  -1   4   93.83    2.23
  -5   1  -4   11.07    0.52
   5  -1   4   10.95    0.71
   5  -1   4   12.26    0.73
  -6   1  -4    1.53    0.31
   6  -1   4    0.91    0.38
   6  -1   4    0.84    0.39
  -7   1  -4   13.54    0.69
   7  -1   4   12.55    0.85
   7  -1   4   15.17    0.88
  -8   1  -4    0.27    0.34
   8  -1   4   -0.25    0.44
   8  -1   4   -0.07    0.41
   9  -1   4   -0.36    0.45
   9  -1   4   -0.55    0.44
  10  -1   4    0.36    0.58
  10  -1   4    0.16    0.46
 -11   1  -4    1.94    0.67
  11  -1   4    1.20    0.62
  11  -1   4    1.07    0.59
 -12   1  -4    3.25    0.80
  12  -1   4    4.57    0.78
 -12   0   4   28.36    1.50
  11   0  -4    0.17    0.50
  11   0  -4   -0.21    0.51
 -11   0   4   -0.34    0.51
  10   0  -4    0.41    0.51
  10   0  -4   -0.43    0.52
 -10   0   4    0.34    0.53
   9   0  -4   51.66    1.70
   9   0  -4   51.31    1.68
  -9   0   4   48.45    1.73
   8   0  -4   27.49    1.13
   8   0  -4   26.78    1.17
  -8   0   4   28.01    1.26
   7   0  -4    8.02    0.63
   7   0  -4    6.90    0.64
  -7   0   4    7.23    0.71
   6   0  -4   53.25    1.50
   6   0  -4   52.57    1.45
  -6   0   4   54.75    1.63
   5   0  -4    0.45    0.29
   5   0  -4    0.62    0.29
  -5   0   4    0.34    0.30
   4   0  -4    0.46    0.27
   4   0  -4    1.20    0.31
  -4   0   4    0.69    0.35
   3   0  -4    1.18    0.31
   3   0  -4    1.45    0.28
  -3   0   4    1.11    0.33
   2   0  -4    1.20    0.24
   2   0  -4    1.56    0.28
  -2   0   4    2.01    0.32
   1   0  -4   11.83    0.46
  -1   0   4   12.24    0.55
  -1   0   4   11.78    0.54
   0   0  -4  283.07    5.52
   0   0   4  298.56    5.54
   0   0   4  286.85    5.38
  -1   0  -4  161.62    3.31
   1   0   4  170.38    3.33
  -2   0  -4   12.31    0.61
   2   0   4   12.08    0.59
  -3   0  -4   59.38    1.51
  -3   0  -4   59.49    1.19
   3   0   4   59.25    1.51
  -4   0  -4    0.38    0.19
   4   0   4    0.30    0.31
   4   0   4   -0.13    0.31
  -5   0  -4   54.73    1.26
   5   0   4   54.44    1.58
   5   0   4   54.74    1.55
  -6   0  -4   21.22    0.74
   6   0   4   20.04    0.95
   6   0   4   20.62    0.91
  -7   0  -4    0.07    0.25
   7   0   4    0.47    0.43
   7   0   4    0.04    0.41
  -8   0  -4   22.01    0.86
   8   0   4   21.18    1.11
   8   0   4   22.76    1.11
   9   0   4    0.85    0.50
   9   0   4    0.34    0.51
 -10   0  -4    0.32    0.52
  10   0   4    0.39    0.50
 -11   0  -4    1.06    0.64
  11   0   4    0.29    0.56
 -12   0  -4    7.27    0.98
  12   0   4    4.47    0.73
 -12   1   4    1.86    0.72
  11  -1  -4    9.02    0.91
  11  -1  -4    7.63    0.88
 -11   1   4    5.50    0.83
  10  -1  -4    0.17    0.48
  10  -1  -4   -0.44    0.40
 -10   1   4    0.99    0.62
   9  -1  -4   19.16    1.02
   9  -1  -4   19.43    1.07
  -9   1   4   21.06    1.18
   8  -1  -4    6.90    0.67
   8  -1  -4    7.58    0.72
  -8   1   4    7.17    0.76
   7  -1  -4   16.40    0.85
   7  -1  -4   16.84    0.90
  -7   1   4   16.16    0.92
   6  -1  -4    2.14    0.38
   6  -1  -4    1.40    0.37
  -6   1   4    1.71    0.46
   5  -1  -4    7.23    0.52
   5  -1  -4    8.05    0.57
  -5   1   4    7.30    0.63
   4  -1  -4   -0.31    0.26
   4  -1  -4    0.02    0.26
  -4   1   4    0.12    0.30
   3  -1  -4    4.42    0.39
   3  -1  -4    3.87    0.36
  -3   1   4    3.77    0.42
   2  -1  -4    2.89    0.31
   2  -1  -4    2.62    0.31
  -2   1   4    2.39    0.34
   1  -1  -4    2.76    0.30
  -1   1   4    2.54    0.27
  -1   1   4    1.97    0.30
   0  -1  -4   88.23    1.83
   0   1   4   87.41    1.82
   0   1   4   86.30    1.75
  -1  -1  -4    1.62    0.30
   1   1   4    1.54    0.28
  -2  -1  -4    6.37    0.45
   2   1   4    7.06    0.50
  -3  -1  -4   13.76    0.72
   3   1   4   15.26    0.69
  -4  -1  -4   41.94    0.93
  -4  -1  -4   42.58    1.22
   4   1   4   39.89    1.23
  -5  -1  -4   50.18    1.17
  -5  -1  -4   50.34    1.45
   5   1   4   52.46    1.46
  -6  -1  -4    0.98    0.27
  -6  -1  -4    1.07    0.36
   6   1   4    0.66    0.36
  -7  -1  -4   37.12    1.07
  -7  -1  -4   38.91    1.39
   7   1   4   37.32    1.33
  -8  -1  -4   -0.05    0.30
  -8  -1  -4    0.64    0.47
   8   1   4    1.08    0.45
  -9  -1  -4    5.65    0.72
   9   1   4    6.13    0.72
 -10  -1  -4   16.96    1.13
  10   1   4   18.30    1.16
 -11  -1  -4    0.86    0.61
  11   1   4    1.14    0.60
 -12  -1  -4    0.84    0.69
  12   1   4   -0.47    0.53
  12  -2  -4   12.92    1.17
 -12   2   4   11.46    1.15
  11  -2  -4    0.40    0.54
 -11   2   4   -0.17    0.53
  10  -2  -4    0.88    0.49
  10  -2  -4    0.47    0.55
 -10   2   4    1.62    0.83
   9  -2  -4   13.95    0.99
   9  -2  -4   15.82    0.94
  -9   2   4   15.63    1.02
   8  -2  -4   -0.30    0.38
   8  -2  -4    0.27    0.33
  -8   2   4    0.00    0.42
   7  -2  -4   24.68    1.08
   7  -2  -4   25.76    0.99
  -7   2   4   24.34    1.11
   6  -2  -4    0.79    0.34
   6  -2  -4    0.40    0.34
  -6   2   4    1.53    0.42
   5  -2  -4   43.23    1.18
   5  -2  -4   40.12    1.25
  -5   2   4   41.55    1.32
   4  -2  -4    8.71    0.56
   4  -2  -4    9.93    0.53
  -4   2   4   10.23    0.68
   3  -2  -4    3.60    0.31
   3  -2  -4    2.83    0.38
  -3   2   4    2.26    0.39
   2  -2  -4   46.31    1.22
   2  -2  -4   48.78    1.10
  -2   2   4   49.10    1.27
   1  -2  -4    0.33    0.26
  -1   2   4    0.16    0.24
  -1   2   4   -0.22    0.20
   0  -2  -4  311.93    5.72
   0   2   4  293.71    5.62
   0   2   4  286.37    5.54
   1   2   4   93.59    1.96
   1   2   4   90.34    1.78
  -2  -2  -4    5.81    0.46
   2   2   4    5.53    0.42
  -3  -2  -4   55.16    1.42
  -3  -2  -4   54.66    1.12
   3   2   4   58.02    1.43
  -4  -2  -4    2.88    0.42
  -4  -2  -4    2.98    0.24
   4   2   4    3.06    0.43
  -5  -2  -4   53.08    1.20
  -5  -2  -4   51.21    1.49
   5   2   4   52.87    1.50
  -6  -2  -4   38.98    1.32
  -6  -2  -4   41.17    1.05
   6   2   4   40.40    1.33
  -7  -2  -4    1.88    0.34
  -7  -2  -4    1.97    0.46
   7   2   4    2.15    0.50
  -8  -2  -4    0.41    0.49
  -8  -2  -4    0.10    0.28
   8   2   4    0.64    0.46
  -9  -2  -4   17.49    1.08
   9   2   4   16.47    1.02
 -10  -2  -4    0.00    0.49
  10   2   4    1.04    0.52
 -11  -2  -4    4.95    0.78
  11   2   4    5.50    0.85
 -12  -2  -4    2.66    0.77
  12   2   4    2.09    0.72
  11  -3  -4    0.46    0.58
 -11   3   4   -0.01    0.55
  10  -3  -4    6.92    0.87
 -10   3   4    5.20    0.82
   9  -3  -4    1.70    0.49
   9  -3  -4    3.24    0.62
  -9   3   4    1.29    0.54
   8  -3  -4    2.00    0.53
   8  -3  -4    2.38    0.47
  -8   3   4    1.50    0.57
   7  -3  -4   24.86    1.12
   7  -3  -4   22.16    0.92
  -7   3   4   24.44    1.16
   6  -3  -4   12.49    0.67
   6  -3  -4   12.26    0.81
  -6   3   4   14.69    0.90
   5  -3  -4    0.11    0.24
   5  -3  -4    0.17    0.30
  -5   3   4    0.18    0.32
   4  -3  -4   22.81    0.87
   4  -3  -4   21.51    0.69
  -4   3   4   21.09    0.89
   3  -3  -4   95.53    1.96
   3  -3  -4   94.05    2.20
  -3   3   4   97.27    2.19
   2  -3  -4   43.61    0.95
   2  -3  -4   42.34    1.18
  -2   3   4   42.86    1.17
   1  -3  -4   67.20    1.57
  -1   3   4   65.65    1.50
  -1   3   4   64.63    1.34
   0  -3  -4  187.34    3.79
   0   3   4  194.76    3.67
   0   3   4  190.07    3.68
  -1  -3  -4   22.49    0.79
   1   3   4   22.25    0.71
   1   3   4   22.35    0.63
  -2  -3  -4   32.60    0.77
  -2  -3  -4   32.33    0.96
   2   3   4   33.38    0.96
  -3  -3  -4    0.15    0.16
  -3  -3  -4   -0.01    0.27
   3   3   4   -0.13    0.26
  -4  -3  -4    8.46    0.58
  -4  -3  -4    9.03    0.41
   4   3   4    9.40    0.67
  -5  -3  -4    4.90    0.48
  -5  -3  -4    5.91    0.39
   5   3   4    6.14    0.55
  -6  -3  -4    2.44    0.31
  -6  -3  -4    1.71    0.41
   6   3   4    0.51    0.39
  -7  -3  -4   23.09    0.81
  -7  -3  -4   24.45    1.06
   7   3   4   20.67    1.01
  -8  -3  -4   10.15    0.81
  -8  -3  -4   11.08    0.67
   8   3   4   12.79    0.96
  -9  -3  -4   10.50    0.68
  -9  -3  -4    9.63    0.83
   9   3   4   12.28    0.99
 -10  -3  -4   27.19    1.31
  10   3   4   28.26    1.41
 -11  -3  -4    1.57    0.62
  11   3   4    1.56    0.63
 -12  -3  -4    0.00    0.53
  12   3   4    0.37    0.58
  11  -4  -4    0.19    0.60
 -11   4   4    0.24    0.59
  10  -4  -4   -0.18    0.55
 -10   4   4    0.63    0.60
   9  -4  -4    7.55    0.84
  -9   4   4    7.64    0.89
   8  -4  -4   18.57    0.89
   8  -4  -4   18.54    1.09
  -8   4   4   18.37    1.12
   7  -4  -4    3.65    0.46
   7  -4  -4    4.86    0.65
  -7   4   4    2.61    0.59
   6  -4  -4   12.05    0.61
   6  -4  -4   11.93    0.79
  -6   4   4   13.15    0.83
   5  -4  -4    8.80    0.51
   5  -4  -4    9.43    0.70
  -5   4   4    9.59    0.75
   4  -4  -4   30.07    0.81
   4  -4  -4   31.01    1.06
  -4   4   4   29.77    1.11
   3  -4  -4  130.61    2.58
   3  -4  -4  133.58    2.93
  -3   4   4  133.56    2.89
   2  -4  -4    8.05    0.56
  -2   4   4    8.92    0.58
  -1   4   4   42.68    1.16
   0  -4  -4    4.93    0.41
   0   4   4    4.67    0.39
   0   4   4    4.37    0.28
   1   4   4  120.38    2.48
   1   4   4  122.72    2.44
  -2  -4  -4   53.33    1.20
  -2  -4  -4   53.29    1.36
   2   4   4   54.70    1.34
  -3  -4  -4    3.80    0.29
  -3  -4  -4    3.38    0.39
   3   4   4    4.59    0.45
  -4  -4  -4   18.84    0.61
  -4  -4  -4   18.74    0.77
   4   4   4   19.74    0.82
  -5  -4  -4   88.64    2.10
  -5  -4  -4   85.17    1.85
   5   4   4   85.26    2.15
  -6  -4  -4   35.09    1.17
  -6  -4  -4   33.76    0.98
   6   4   4   34.25    1.24
  -7  -4  -4    3.28    0.38
  -7  -4  -4    2.74    0.48
   7   4   4    2.80    0.56
  -8  -4  -4    0.77    0.34
  -8  -4  -4    1.13    0.42
   8   4   4   -0.05    0.40
  -9  -4  -4   18.58    1.06
  -9  -4  -4   17.89    0.83
   9   4   4   18.74    1.11
 -10  -4  -4   -0.18    0.45
  10   4   4    0.65    0.54
 -11  -4  -4    2.87    0.65
  11   4   4    2.17    0.69
 -12  -4  -4    2.08    0.70
  12   4   4    2.95    0.76
  11  -5  -4    9.18    1.06
 -11   5   4    8.52    1.01
  10  -5  -4    5.84    0.85
 -10   5   4    5.11    0.83
   9  -5  -4    1.04    0.60
  -9   5   4    0.76    0.57
   8  -5  -4   14.13    0.96
  -8   5   4   13.58    0.96
   7  -5  -4   20.45    0.81
   7  -5  -4   19.18    1.09
  -7   5   4   19.92    1.06
   6  -5  -4    2.57    0.34
   6  -5  -4    1.51    0.48
  -6   5   4    1.77    0.52
   5  -5  -4    0.70    0.40
   5  -5  -4    1.06    0.24
  -5   5   4    1.17    0.44
   4  -5  -4   73.97    1.55
   4  -5  -4   73.91    1.96
  -4   5   4   72.73    1.92
   3  -5  -4   89.31    1.74
   3  -5  -4   87.93    2.16
  -3   5   4   89.93    2.14
   2  -5  -4   44.99    1.30
  -2   5   4   45.28    1.28
   1  -5  -4    5.93    0.47
  -1   5   4    5.48    0.45
   0  -5  -4  105.59    2.37
   0   5   4  107.51    2.13
   0   5   4  107.21    2.29
  -1  -5  -4    0.94    0.29
  -1  -5  -4    1.75    0.32
   1   5   4    1.53    0.27
  -2  -5  -4   14.51    0.58
  -2  -5  -4   14.67    0.70
   2   5   4   14.82    0.66
  -3  -5  -4   61.34    1.38
  -3  -5  -4   59.99    1.52
   3   5   4   59.95    1.53
  -4  -5  -4   48.55    1.36
  -4  -5  -4   48.89    1.19
   4   5   4   53.31    1.44
  -5  -5  -4   48.71    1.40
  -5  -5  -4   49.68    1.23
   5   5   4   49.21    1.47
  -6  -5  -4    0.91    0.26
  -6  -5  -4    1.04    0.37
   6   5   4    1.27    0.43
  -7  -5  -4    0.00    0.28
  -7  -5  -4    0.01    0.33
   7   5   4    0.03    0.38
  -8  -5  -4   26.85    1.17
  -8  -5  -4   26.00    0.96
   8   5   4   27.23    1.24
  -9  -5  -4    5.62    0.55
  -9  -5  -4    5.98    0.69
   9   5   4    6.09    0.80
 -10  -5  -4    8.12    0.83
  10   5   4    7.22    0.90
 -11  -5  -4    3.10    0.69
  11   5   4    2.47    0.67
 -12  -5  -4    0.13    0.55
  12   5   4   -0.60    0.57
  11  -6  -4    0.84    0.65
 -11   6   4    1.82    0.72
  10  -6  -4    0.74    0.59
 -10   6   4    0.79    0.60
   9  -6  -4    8.20    0.91
  -9   6   4    8.45    0.95
   8  -6  -4   14.69    1.13
  -8   6   4   15.84    1.10
   7  -6  -4    0.07    0.43
  -7   6   4    0.58    0.52
   6  -6  -4   34.62    1.36
  -6   6   4   37.85    1.40
   5  -6  -4    3.53    0.53
   5  -6  -4    3.12    0.29
  -5   6   4    2.68    0.51
   4  -6  -4    1.37    0.17
   4  -6  -4    0.97    0.37
  -4   6   4    1.11    0.41
   3  -6  -4   15.64    0.80
  -3   6   4   17.02    0.80
   2  -6  -4   18.94    0.88
  -2   6   4   20.53    0.87
   1  -6  -4   -0.11    0.28
  -1   6   4    0.02    0.28
   0  -6  -4   83.76    2.01
   0   6   4   84.71    1.93
   0   6   4   84.35    1.73
  -1  -6  -4    1.03    0.31
  -1  -6  -4    0.57    0.30
   1   6   4    1.15    0.27
  -2  -6  -4   75.59    1.70
  -2  -6  -4   72.45    1.79
   2   6   4   76.26    1.74
  -3  -6  -4  141.80    3.00
  -3  -6  -4  138.90    2.86
   3   6   4  140.70    3.01
  -4  -6  -4   15.45    0.62
  -4  -6  -4   15.16    0.74
   4   6   4   15.77    0.77
  -5  -6  -4    1.83    0.38
  -5  -6  -4    2.32    0.33
   5   6   4    1.23    0.38
  -6  -6  -4    6.00    0.47
  -6  -6  -4    5.54    0.54
   6   6   4    5.51    0.63
  -7  -6  -4   13.36    0.68
  -7  -6  -4   12.40    0.81
   7   6   4   12.52    0.90
  -8  -6  -4   20.53    0.99
  -8  -6  -4   20.80    0.88
   8   6   4   17.55    1.06
  -9  -6  -4   52.01    1.69
  -9  -6  -4   48.82    1.48
   9   6   4   50.96    1.87
 -10  -6  -4   11.50    0.94
  10   6   4   12.15    1.09
 -11  -6  -4    5.19    0.77
  11   6   4    3.61    0.78
 -12  -6  -4   11.46    1.03
  12   6   4   10.71    1.16
  10  -7  -4    2.68    0.80
 -10   7   4    3.52    0.78
   9  -7  -4    1.36    0.63
  -9   7   4    1.30    0.61
   8  -7  -4    3.04    0.65
  -8   7   4    1.76    0.59
   7  -7  -4   13.84    0.97
  -7   7   4   13.51    1.04
   6  -7  -4    0.05    0.44
  -6   7   4    0.51    0.43
   5  -7  -4    0.65    0.42
  -5   7   4    0.02    0.38
   4  -7  -4   14.31    0.88
  -4   7   4   14.58    0.82
   3  -7  -4   -0.16    0.33
  -3   7   4   -0.22    0.35
   2  -7  -4    0.23    0.31
  -2   7   4   -0.13    0.28
   1  -7  -4    7.63    0.57
  -1   7   4    8.05    0.59
   0  -7  -4    4.42    0.48
   0   7   4    4.80    0.34
   0   7   4    4.96    0.46
  -1  -7  -4   36.59    1.16
  -1  -7  -4   39.67    1.14
   1   7   4   36.91    0.98
  -2  -7  -4   40.23    1.19
  -2  -7  -4   40.94    1.15
   2   7   4   40.43    1.13
  -3  -7  -4   49.28    1.28
  -3  -7  -4   47.35    1.31
   3   7   4   49.01    1.37
  -4  -7  -4   25.53    0.84
  -4  -7  -4   24.10    0.90
   4   7   4   23.79    0.99
  -5  -7  -4   10.32    0.57
  -5  -7  -4   10.83    0.67
   5   7   4   10.82    0.78
  -6  -7  -4   27.72    0.98
  -6  -7  -4   30.21    1.07
   6   7   4   28.80    1.16
  -7  -7  -4    1.04    0.38
  -7  -7  -4    1.95    0.38
   7   7   4    1.20    0.43
  -8  -7  -4    0.44    0.38
  -8  -7  -4    0.15    0.33
   8   7   4    0.44    0.39
  -9  -7  -4   41.40    1.34
  -9  -7  -4   42.74    1.49
   9   7   4   37.77    1.66
 -10  -7  -4    1.49    0.52
  10   7   4    0.93    0.59
 -11  -7  -4    2.07    0.61
  11   7   4    2.37    0.71
  12   7   4    6.28    0.98
  10  -8  -4    0.89    0.67
 -10   8   4    0.37    0.59
   9  -8  -4    4.31    0.81
  -9   8   4    5.41    0.82
   8  -8  -4   24.23    1.37
  -8   8   4   24.43    1.33
   7  -8  -4   12.19    1.05
  -7   8   4   11.51    1.02
   6  -8  -4    0.69    0.51
  -6   8   4   -0.02    0.44
   5  -8  -4   15.31    0.99
  -5   8   4   17.50    0.97
   4  -8  -4   11.43    0.87
  -4   8   4   12.68    0.82
   3  -8  -4   38.95    1.37
  -3   8   4   38.92    1.34
   2  -8  -4   -0.09    0.33
  -2   8   4    0.33    0.37
   1  -8  -4  107.01    2.56
  -1   8   4  109.40    2.55
   0  -8  -4  130.80    2.93
   0   8   4  131.17    2.61
   0   8   4  132.08    2.90
  -1  -8  -4    1.31    0.37
  -1  -8  -4    2.78    0.43
   1   8   4    1.83    0.30
  -2  -8  -4   21.07    0.84
  -2  -8  -4   19.27    0.85
   2   8   4   20.90    0.80
  -3  -8  -4   28.96    0.99
  -3  -8  -4   28.06    0.97
   3   8   4   29.39    1.01
  -4  -8  -4  111.92    2.56
  -4  -8  -4  113.98    2.51
   4   8   4  111.60    2.62
  -5  -8  -4   45.52    1.34
  -5  -8  -4   47.05    1.33
   5   8   4   44.47    1.47
  -6  -8  -4    5.22    0.54
  -6  -8  -4    5.70    0.51
   6   8   4    5.62    0.62
  -7  -8  -4    6.75    0.58
  -7  -8  -4    7.62    0.66
   7   8   4    8.04    0.78
  -8  -8  -4    0.05    0.37
  -8  -8  -4   -0.14    0.34
   8   8   4   -0.38    0.44
  -9  -8  -4    4.03    0.60
  -9  -8  -4    4.44    0.57
   9   8   4    2.04    0.65
 -10  -8  -4   -0.10    0.43
  10   8   4    0.69    0.56
 -11  -8  -4   12.87    1.00
  11   8   4   10.67    1.11
  12   8   4   16.73    1.46
  10  -9  -4    0.22    0.80
 -10   9   4    0.72    0.63
   9  -9  -4   -0.23    0.52
  -9   9   4   -0.19    0.59
   8  -9  -4    3.53    0.71
  -8   9   4    2.99    0.72
   7  -9  -4    0.82    0.56
  -7   9   4    0.65    0.56
   6  -9  -4    5.55    0.77
  -6   9   4    5.04    0.71
   5  -9  -4    0.99    0.47
  -5   9   4    1.29    0.53
   4  -9  -4   31.31    1.28
  -4   9   4   29.69    1.24
   3  -9  -4    6.45    0.63
  -3   9   4    7.29    0.71
   2  -9  -4    5.70    0.64
  -2   9   4    5.24    0.59
   1  -9  -4    1.46    0.42
  -1   9   4    1.24    0.41
   0  -9  -4   14.81    0.83
   0   9   4   14.65    0.54
   0   9   4   15.89    0.84
  -1  -9  -4  135.37    3.00
  -1  -9  -4  134.28    3.01
   1   9   4  132.98    2.78
  -2  -9  -4    0.04    0.29
  -2  -9  -4   -0.58    0.25
   2   9   4   -0.09    0.25
  -3  -9  -4    0.61    0.31
  -3  -9  -4    0.61    0.30
   3   9   4    0.02    0.28
  -4  -9  -4   33.71    1.12
  -4  -9  -4   36.42    1.14
   4   9   4   34.36    1.20
  -5  -9  -4    4.23    0.49
  -5  -9  -4    5.01    0.50
   5   9   4    4.62    0.56
  -6  -9  -4    2.73    0.43
  -6  -9  -4    2.36    0.42
   6   9   4    2.51    0.52
  -7  -9  -4   14.04    0.84
  -7  -9  -4   15.63    0.84
   7   9   4   14.86    0.96
  -8  -9  -4   11.34    0.80
  -8  -9  -4   11.88    0.81
   8   9   4   11.49    0.97
  -9  -9  -4    1.57    0.49
  -9  -9  -4    1.26    0.47
   9   9   4    2.75    0.66
 -10  -9  -4    3.70    0.63
  10   9   4    2.48    0.69
  11   9   4    1.84    0.67
  12   9   4    2.15    0.78
   9 -10  -4    0.02    0.61
  -9  10   4   -0.24    0.50
   8 -10  -4   19.63    1.26
  -8  10   4   16.86    1.14
   7 -10  -4   14.18    1.15
  -7  10   4   11.42    1.04
   6 -10  -4   26.17    1.31
  -6  10   4   26.57    1.33
   5 -10  -4   17.44    1.07
  -5  10   4   18.47    1.05
   4 -10  -4    0.13    0.44
  -4  10   4   -0.19    0.43
   3 -10  -4    0.10    0.38
  -3  10   4    0.59    0.44
   2 -10  -4    0.81    0.44
  -2  10   4    1.05    0.44
   1 -10  -4   14.77    0.84
  -1  10   4   16.24    0.46
  -1  10   4   17.26    0.88
   0 -10  -4  154.26    3.52
   0  10   4  161.14    3.52
   0  10   4  156.97    3.13
  -1 -10  -4    0.32    0.31
  -1 -10  -4    0.16    0.32
   1  10   4   -0.42    0.25
  -2 -10  -4    0.37    0.34
  -2 -10  -4   -0.06    0.30
   2  10   4    0.18    0.26
  -3 -10  -4   10.52    0.72
  -3 -10  -4   11.61    0.70
   3  10   4   11.14    0.76
  -4 -10  -4   -0.20    0.30
  -4 -10  -4   -0.13    0.28
   4  10   4   -0.10    0.30
  -5 -10  -4    4.84    0.52
  -5 -10  -4    5.27    0.56
   5  10   4    4.64    0.59
  -6 -10  -4   23.56    0.99
  -6 -10  -4   23.09    0.96
   6  10   4   22.91    1.09
  -7 -10  -4   51.24    1.54
  -7 -10  -4   47.36    1.50
   7  10   4   49.87    1.72
  -8 -10  -4    2.08    0.47
  -8 -10  -4    2.10    0.49
   8  10   4    1.61    0.57
  -9 -10  -4   26.88    1.15
  -9 -10  -4   26.54    1.13
   9  10   4   28.96    1.40
  10  10   4    0.39    0.58
  11  10   4    0.34    0.60
  12  10   4   17.54    1.43
   9 -11  -4   -0.33    0.56
  -9  11   4   -0.04    0.52
   8 -11  -4    3.95    0.79
  -8  11   4    3.86    0.75
   7 -11  -4    1.63    0.69
  -7  11   4    1.82    0.63
   6 -11  -4    1.51    0.57
  -6  11   4    2.67    0.65
   5 -11  -4    0.10    0.49
  -5  11   4    0.46    0.52
   4 -11  -4    6.32    0.75
  -4  11   4    6.84    0.77
   3 -11  -4    1.98    0.53
  -3  11   4    2.49    0.54
   2 -11  -4    9.68    0.79
  -2  11   4    9.63    0.83
   1 -11  -4   22.24    1.08
  -1  11   4   24.44    1.14
   0 -11  -4   65.09    1.85
   0  11   4   64.09    1.46
   0  11   4   64.98    1.84
  -1 -11  -4   64.14    1.84
  -1 -11  -4   63.28    1.78
   1  11   4   64.99    1.56
  -2 -11  -4    0.81    0.38
  -2 -11  -4    1.28    0.38
   2  11   4    0.97    0.32
  -3 -11  -4    1.95    0.42
  -3 -11  -4    1.51    0.44
   3  11   4    2.01    0.41
  -4 -11  -4    2.34    0.44
  -4 -11  -4    1.80    0.45
   4  11   4    1.86    0.44
  -5 -11  -4    6.35    0.63
  -5 -11  -4    6.39    0.57
   5  11   4    4.89    0.62
  -6 -11  -4   13.14    0.82
  -6 -11  -4   11.99    0.75
   6  11   4   13.51    0.95
  -7 -11  -4    2.98    0.50
  -7 -11  -4    3.52    0.57
   7  11   4    2.62    0.58
  -8 -11  -4    0.03    0.38
  -8 -11  -4   -0.01    0.39
   8  11   4    0.55    0.52
  -9 -11  -4    1.74    0.54
   9  11   4    2.57    0.63
  10  11   4    5.02    0.81
  11  11   4   -0.15    0.62
  12  11   4   -0.25    0.59
   8 -12  -4    0.14    0.64
  -8  12   4   -0.11    0.55
   7 -12  -4    8.95    1.00
  -7  12   4    7.85    0.96
   6 -12  -4    0.37    0.54
  -6  12   4    0.44    0.54
   5 -12  -4    0.96    0.53
  -5  12   4   -0.39    0.47
   4 -12  -4    0.99    0.53
  -4  12   4    0.11    0.47
   3 -12  -4   31.96    1.35
  -3  12   4   29.36    1.37
   2 -12  -4    0.97    0.46
  -2  12   4    1.22    0.49
   1 -12  -4    0.65    0.45
  -1  12   4   -0.52    0.37
   0 -12  -4   31.77    1.27
   0  12   4   33.00    0.92
   0  12   4   32.67    1.31
  -1 -12  -4   34.75    1.27
  -1 -12  -4   33.68    1.28
   1  12   4   33.29    1.03
  -2 -12  -4    6.53    0.61
  -2 -12  -4    5.97    0.64
   2  12   4    7.34    0.56
  -3 -12  -4    1.67    0.44
  -3 -12  -4    1.69    0.43
   3  12   4    2.27    0.42
  -4 -12  -4    7.36    0.70
  -4 -12  -4    7.22    0.64
   4  12   4    7.37    0.69
  -5 -12  -4    5.24    0.56
  -5 -12  -4    3.73    0.56
   5  12   4    3.53    0.56
  -6 -12  -4    2.43    0.47
  -6 -12  -4    1.84    0.48
   6  12   4    1.18    0.47
  -7 -12  -4    1.59    0.44
  -7 -12  -4    1.17    0.48
   7  12   4    2.08    0.56
  -8 -12  -4    7.89    0.69
  -8 -12  -4    5.99    0.71
   8  12   4    6.10    0.85
  -9 -12  -4   18.30    1.08
   9  12   4   16.71    1.32
 -10 -12  -4    0.62    0.45
  10  12   4    0.16    0.58
  11  12   4    2.87    0.76
   8 -13  -4    0.79    0.69
  -8  13   4   -0.27    0.55
   7 -13  -4    0.92    0.61
  -7  13   4    1.40    0.64
   6 -13  -4    4.00    0.80
  -6  13   4    3.11    0.69
   5 -13  -4    2.52    0.70
  -5  13   4    2.41    0.67
   4 -13  -4    3.35    0.69
  -4  13   4    5.52    0.79
   3 -13  -4   28.07    1.38
  -3  13   4   30.74    1.37
   2 -13  -4   16.62    1.07
  -2  13   4   14.80    0.98
   1 -13  -4   21.32    1.14
  -1  13   4   21.92    1.11
   0 -13  -4   56.49    1.77
   0  13   4   54.32    1.78
  -1 -13  -4    1.38    0.46
  -1 -13  -4    2.15    0.51
   1  13   4    1.40    0.34
  -2 -13  -4    0.54    0.46
  -2 -13  -4    1.15    0.42
   2  13   4    1.04    0.35
  -3 -13  -4   14.32    0.86
  -3 -13  -4   14.49    0.88
   3  13   4   13.81    0.81
  -4 -13  -4    0.10    0.37
  -4 -13  -4   -0.13    0.37
   4  13   4   -0.20    0.37
  -5 -13  -4    4.30    0.54
  -5 -13  -4    5.22    0.63
   5  13   4    3.96    0.61
  -6 -13  -4    2.30    0.45
  -6 -13  -4    2.03    0.53
   6  13   4    1.91    0.54
  -7 -13  -4    2.84    0.49
  -7 -13  -4    4.49    0.64
   7  13   4    3.64    0.69
  -8 -13  -4    0.44    0.46
   8  13   4   -0.52    0.46
  -9 -13  -4   -0.41    0.46
   9  13   4    0.88    0.60
 -10 -13  -4   12.49    1.02
  10  13   4   12.12    1.13
  11  13   4    0.67    0.67
   7 -14  -4    4.28    0.86
  -7  14   4    3.19    0.77
   6 -14  -4    4.70    0.82
  -6  14   4    5.92    0.86
   5 -14  -4    0.74    0.58
  -5  14   4    1.16    0.57
   4 -14  -4    6.97    0.90
  -4  14   4    8.47    0.94
   3 -14  -4   13.70    1.07
  -3  14   4   17.60    1.15
   2 -14  -4   49.13    1.80
  -2  14   4   48.65    1.81
   1 -14  -4    7.55    0.81
  -1  14   4    8.04    0.82
   0 -14  -4   10.57    0.86
   0  14   4   10.57    0.91
  -1 -14  -4    4.72    0.65
  -1 -14  -4    3.69    0.64
  -2 -14  -4    1.74    0.47
  -2 -14  -4    1.98    0.56
   2  14   4    2.19    0.42
  -3 -14  -4   36.63    1.44
  -3 -14  -4   39.44    1.37
   3  14   4   36.26    1.30
  -4 -14  -4    2.96    0.53
   4  14   4    2.93    0.56
  -5 -14  -4    0.08    0.44
  -5 -14  -4    0.31    0.39
   5  14   4   -0.03    0.44
  -6 -14  -4    9.09    0.86
  -6 -14  -4    9.60    0.77
   6  14   4   10.54    0.95
  -7 -14  -4   14.70    0.97
   7  14   4   15.35    1.10
  -8 -14  -4    5.51    0.74
   8  14   4    5.81    0.86
  -9 -14  -4   21.60    1.20
   9  14   4   21.47    1.30
 -10 -14  -4    1.21    0.60
  10  14   4    0.61    0.58
  11  14   4    0.98    0.69
   6 -15  -4    2.11    0.73
  -6  15   4    1.02    0.70
   5 -15  -4    0.71    0.57
  -5  15   4    0.41    0.60
   4 -15  -4   17.29    1.33
  -4  15   4   17.50    1.14
   3 -15  -4    5.88    0.83
  -3  15   4    3.40    0.71
   2 -15  -4    3.01    0.64
  -2  15   4    2.65    0.68
   1 -15  -4    3.35    0.65
  -1  15   4    3.16    0.65
   0 -15  -4  103.40    2.83
   0  15   4  104.68    2.86
  -1 -15  -4    7.39    0.88
  -1 -15  -4    8.74    0.81
  -2 -15  -4   22.59    1.14
  -2 -15  -4   24.82    1.23
   2  15   4   24.12    0.99
  -3 -15  -4   18.41    1.08
  -3 -15  -4   20.18    1.04
   3  15   4   20.37    1.02
  -4 -15  -4    6.53    0.82
  -4 -15  -4    8.20    0.74
   4  15   4    7.61    0.74
  -5 -15  -4    3.17    0.63
  -5 -15  -4    3.63    0.58
   5  15   4    4.15    0.67
  -6 -15  -4    0.53    0.49
  -6 -15  -4    1.00    0.47
   6  15   4    1.36    0.56
  -7 -15  -4    0.73    0.49
   7  15   4   -0.73    0.47
  -8 -15  -4   -0.10    0.48
   8  15   4    0.78    0.56
  -9 -15  -4    1.31    0.55
   9  15   4    0.84    0.60
 -10 -15  -4    4.85    0.77
  10  15   4    3.51    0.84
   6 -16  -4   17.98    1.43
  -6  16   4   21.61    1.38
   5 -16  -4    0.27    0.56
  -5  16   4    0.07    0.66
   4 -16  -4    0.66    0.57
  -4  16   4    0.59    0.60
   3 -16  -4   16.35    1.28
  -3  16   4   19.41    1.26
   2 -16  -4    5.18    0.77
  -2  16   4    4.18    0.76
   1 -16  -4   16.61    1.14
  -1  16   4   15.81    1.21
   0 -16  -4   22.47    1.23
   0  16   4   19.79    1.26
  -1 -16  -4   12.11    1.07
  -1 -16  -4   12.23    0.99
  -2 -16  -4   -0.86    0.48
  -2 -16  -4   -0.26    0.47
  -3 -16  -4   12.28    1.03
  -3 -16  -4   12.27    0.95
   3  16   4   12.83    0.88
  -4 -16  -4   29.92    1.42
  -4 -16  -4   28.39    1.23
   4  16   4   28.19    1.27
  -5 -16  -4    7.89    0.90
  -5 -16  -4    8.83    0.78
   5  16   4    6.63    0.81
  -6 -16  -4    1.11    0.57
   6  16   4    1.63    0.60
  -7 -16  -4    3.33    0.70
   7  16   4    2.88    0.70
  -8 -16  -4    0.40    0.53
   8  16   4   -0.81    0.51
  -9 -16  -4    7.09    0.87
   9  16   4    6.05    0.93
 -10 -16  -4    0.28    0.54
  10  16   4    0.34    0.65
   5 -17  -4    3.79    0.85
  -5  17   4    5.69    0.94
   4 -17  -4    0.79    0.65
  -4  17   4    0.21    0.58
   3 -17  -4    2.59    0.74
  -3  17   4    2.31    0.72
   2 -17  -4    1.86    0.67
  -2  17   4    0.66    0.60
   1 -17  -4    3.91    0.72
  -1  17   4    3.81    0.75
   0 -17  -4    1.03    0.53
   0  17   4    0.39    0.55
  -1 -17  -4    9.21    0.91
  -1 -17  -4    9.80    0.99
  -2 -17  -4    0.68    0.53
  -2 -17  -4    0.67    0.53
  -3 -17  -4    1.48    0.53
  -3 -17  -4    1.25    0.62
  -4 -17  -4    1.59    0.53
  -4 -17  -4    0.71    0.56
   4  17   4    1.43    0.54
  -5 -17  -4    3.43    0.70
   5  17   4    3.81    0.65
  -6 -17  -4   -0.14    0.53
   6  17   4    0.52    0.54
  -7 -17  -4    0.89    0.59
   7  17   4    1.78    0.64
  -8 -17  -4    2.94    0.72
   8  17   4    4.00    0.77
  -9 -17  -4   -0.07    0.53
   9  17   4    0.59    0.71
   4 -18  -4    1.79    0.71
  -4  18   4    0.62    0.59
   3 -18  -4    5.56    0.91
  -3  18   4    3.46    0.74
   2 -18  -4    4.10    0.80
  -2  18   4    2.64    0.74
   1 -18  -4   12.65    1.14
  -1  18   4   14.08    1.22
   0 -18  -4   32.79    1.54
   0  18   4   36.44    1.70
  -1 -18  -4    1.42    0.58
  -1 -18  -4    2.21    0.67
   1  18   4    1.53    0.69
  -2 -18  -4    6.32    0.91
  -2 -18  -4    7.06    0.86
  -3 -18  -4   12.47    1.01
  -3 -18  -4   14.27    1.22
  -4 -18  -4    7.33    0.96
  -4 -18  -4    7.42    0.76
  -5 -18  -4    3.28    0.75
   5  18   4    3.05    0.65
  -6 -18  -4    3.95    0.78
   6  18   4    2.08    0.64
  -7 -18  -4    8.99    0.98
   7  18   4    7.71    0.96
  -8 -18  -4    1.97    0.67
   8  18   4    3.19    0.78
   2 -19  -4    0.39    0.56
  -2  19   4    1.13    0.66
   1 -19  -4    6.48    0.92
  -1  19   4    6.99    0.99
   0 -19  -4   -0.23    0.53
   0  19   4    1.35    0.65
  -1 -19  -4   32.68    1.52
   1  19   4   31.97    1.65
  -2 -19  -4   -0.86    0.42
  -2 -19  -4    0.48    0.64
  -3 -19  -4    2.90    0.64
  -3 -19  -4    3.68    0.84
  -4 -19  -4    2.87    0.75
  -5 -19  -4   -0.09    0.57
  -6 -19  -4    0.45    0.61
   6  19   4    1.14    0.59
  -7 -19  -4    4.32    0.90
   7  19   4    5.04    0.85
   1 -20  -4   10.61    1.10
  -1  20   4   12.65    1.23
   0 -20  -4   11.24    1.07
   0  20   4   11.55    1.16
  -1 -20  -4    0.78    0.56
   1  20   4    0.25    0.64
  -2 -20  -4    3.83    0.87
  -2 -20  -4    5.95    0.85
  -3 -20  -4    0.90    0.76
  -4 -20  -4    0.01    0.66
  -5 -20  -4    0.37    0.64
  -6 -20  -4   11.90    1.17
   4  19  -5   -0.03    0.60
  -4 -19   5    0.61    0.66
   3  19  -5    3.01    0.74
  -3 -19   5    0.00    0.66
  -2 -19   5    4.04    0.88
  -1 -19   5    0.53    0.69
   6  18  -5    0.74    0.67
  -6 -18   5    0.87    0.67
   5  18  -5    3.21    0.79
  -5 -18   5    2.68    0.77
   4  18  -5    2.57    0.72
  -4 -18   5    3.19    0.83
   3  18  -5    0.80    0.60
  -3 -18   5    0.67    0.72
   2  18  -5   12.25    1.08
  -2 -18   5   14.92    1.36
  -1 -18   5    3.32    0.79
   0 -18   5    1.36    0.79
   1 -18   5    4.68    0.88
  -2  18  -5    8.75    1.01
   2 -18   5    9.14    1.00
   7  17  -5    1.95    0.72
  -7 -17   5    2.05    0.70
   6  17  -5    1.07    0.65
  -6 -17   5    0.82    0.62
   5  17  -5   10.27    1.10
  -5 -17   5    9.99    1.07
   4  17  -5   -0.16    0.50
  -4 -17   5    0.31    0.62
   3  17  -5    0.42    0.57
  -3 -17   5   -0.30    0.53
   2  17  -5    0.92    0.60
  -2 -17   5    0.61    0.59
   1  17  -5    0.06    0.47
  -1 -17   5    1.39    0.62
   0 -17   5    0.75    0.65
   1 -17   5    5.99    0.95
   1 -17   5    5.98    0.84
   2 -17   5    6.83    0.89
   2 -17   5    4.86    0.86
  -3  17  -5    0.05    0.57
   3 -17   5    0.40    0.63
   8  16  -5   -0.32    0.56
  -8 -16   5    0.26    0.55
   7  16  -5    0.50    0.68
  -7 -16   5    1.06    0.65
   6  16  -5    5.68    0.93
  -6 -16   5    7.24    0.94
   5  16  -5    5.78    0.84
  -5 -16   5    5.05    0.88
   4  16  -5    2.16    0.61
  -4 -16   5    2.00    0.65
   3  16  -5    0.29    0.52
  -3 -16   5    0.44    0.54
   2  16  -5    0.06    0.48
  -2 -16   5    0.19    0.59
   1  16  -5    8.85    0.86
  -1 -16   5    6.50    0.94
   0  16  -5    1.13    0.54
   0 -16   5    1.52    0.64
   0 -16   5    1.83    0.56
   1 -16   5    4.87    0.70
   1 -16   5    4.18    0.76
   2 -16   5    0.84    0.58
   2 -16   5   -0.04    0.54
  -3  16  -5    2.65    0.69
   3 -16   5    1.97    0.69
  -4  16  -5    3.13    0.72
   4 -16   5    3.92    0.83
   9  15  -5    0.33    0.61
  -9 -15   5    0.52    0.57
   8  15  -5    4.24    0.81
  -8 -15   5    3.95    0.78
   7  15  -5    2.80    0.72
  -7 -15   5    2.22    0.72
   6  15  -5    0.81    0.59
  -6 -15   5    0.04    0.54
   5  15  -5   10.42    1.05
  -5 -15   5    7.97    0.94
   4  15  -5   -0.30    0.53
  -4 -15   5   -0.22    0.50
   3  15  -5    0.30    0.50
  -3 -15   5   -0.21    0.51
   2  15  -5    2.26    0.59
  -2 -15   5    2.34    0.65
   1  15  -5    0.11    0.49
  -1 -15   5    0.40    0.58
   0  15  -5   -0.18    0.43
   0 -15   5   -0.52    0.40
   0 -15   5   -0.41    0.46
  -1  15  -5    3.92    0.61
   1 -15   5    1.25    0.54
   1 -15   5    3.45    0.69
   2 -15   5    1.73    0.56
   2 -15   5    0.94    0.59
  -3  15  -5    0.19    0.52
   3 -15   5   -0.07    0.50
  -4  15  -5    0.21    0.52
   4 -15   5   -0.18    0.53
  -5  15  -5    1.81    0.65
   5 -15   5    3.47    0.81
  10  14  -5    3.87    0.92
 -10 -14   5    1.68    0.81
   9  14  -5    0.16    0.65
  -9 -14   5    0.30    0.61
   8  14  -5   -0.05    0.55
  -8 -14   5   -0.07    0.52
   7  14  -5    0.33    0.55
  -7 -14   5    0.63    0.57
   6  14  -5   29.67    1.50
  -6 -14   5   28.59    1.47
   5  14  -5    0.23    0.54
  -5 -14   5   -0.56    0.40
   4  14  -5   14.75    1.14
  -4 -14   5   15.73    1.08
   3  14  -5   -0.09    0.46
  -3 -14   5    0.34    0.54
   2  14  -5    3.09    0.62
  -2 -14   5    2.99    0.67
   1  14  -5    3.11    0.60
  -1 -14   5    3.81    0.68
  -1 -14   5    3.35    0.49
   0  14  -5    0.07    0.44
   0 -14   5    0.00    0.47
   0 -14   5    0.56    0.41
  -1  14  -5    5.41    0.68
   1 -14   5    4.34    0.65
   1 -14   5    4.27    0.74
   2 -14   5    3.15    0.69
   2 -14   5    3.40    0.63
  -3  14  -5    0.92    0.82
   3 -14   5    0.41    0.53
  -4  14  -5    1.12    0.55
   4 -14   5    1.50    0.69
  -5  14  -5    9.17    0.94
   5 -14   5    8.22    1.04
  -6  14  -5    3.10    0.71
   6 -14   5    1.78    0.78
  10  13  -5   10.91    1.21
 -10 -13   5    8.72    1.08
   9  13  -5   11.57    1.17
  -9 -13   5   12.85    1.19
   8  13  -5   10.50    1.11
  -8 -13   5   10.54    1.04
   7  13  -5    0.19    0.54
  -7 -13   5    0.45    0.53
   6  13  -5   11.77    1.03
  -6 -13   5    9.71    0.96
   5  13  -5   36.82    1.62
  -5 -13   5   40.55    1.64
   4  13  -5    0.22    0.48
  -4 -13   5   -0.49    0.42
   3  13  -5   -0.29    0.44
  -3 -13   5   -0.07    0.46
   2  13  -5    1.25    0.48
  -2 -13   5    1.44    0.56
   1  13  -5    1.08    0.48
  -1 -13   5    1.58    0.43
  -1 -13   5    1.63    0.56
   0  13  -5    0.52    0.44
   0 -13   5   -0.34    0.37
   0 -13   5    0.02    0.45
  -1  13  -5   13.22    0.88
   1 -13   5   13.54    0.90
   1 -13   5   15.07    1.09
   2 -13   5    1.11    0.44
   2 -13   5    0.62    0.51
   2 -13   5    1.30    0.51
  -3  13  -5   13.71    1.05
   3 -13   5   12.60    0.83
   3 -13   5   10.36    0.95
  -4  13  -5    9.36    0.91
   4 -13   5   10.82    0.99
  -5  13  -5    0.62    0.51
   5 -13   5    0.53    0.63
  -6  13  -5    0.33    0.51
   6 -13   5   -0.01    0.59
   7 -13   5    1.86    0.78
  10  12  -5    7.68    1.07
 -10 -12   5    8.63    0.97
   9  12  -5    0.74    0.64
  -9 -12   5    0.74    0.55
   8  12  -5    0.78    0.59
  -8 -12   5    0.69    0.55
   7  12  -5   20.63    1.24
  -7 -12   5   20.06    1.20
   6  12  -5    3.22    0.70
  -6 -12   5    3.78    0.66
   5  12  -5    8.03    0.86
  -5 -12   5   10.79    0.95
   4  12  -5    3.43    0.61
  -4 -12   5    3.84    0.67
   3  12  -5    0.69    0.48
  -3 -12   5    0.42    0.47
   2  12  -5   32.34    1.34
  -2 -12   5   33.20    1.04
  -2 -12   5   33.95    1.41
   1  12  -5   14.35    0.94
  -1 -12   5   14.75    0.76
  -1 -12   5   12.53    0.88
   0  12  -5    2.31    0.51
   0 -12   5    1.81    0.54
   0 -12   5    2.36    0.44
  -1  12  -5    8.49    0.76
   1 -12   5    7.76    0.71
   1 -12   5    8.77    0.81
   2 -12   5    3.95    0.62
   2 -12   5    2.60    0.58
   2 -12   5    2.94    0.50
   3 -12   5    0.90    0.46
   3 -12   5    0.89    0.45
   3 -12   5    1.15    0.52
  -4  12  -5    5.41    0.72
   4 -12   5    5.80    0.83
  -5  12  -5   30.69    1.38
   5 -12   5   28.37    1.50
  -6  12  -5    4.07    0.69
   6 -12   5    4.53    0.83
  -7  12  -5    3.55    0.71
   7 -12   5    3.19    0.75
  11  11  -5    5.12    0.97
 -11 -11   5    7.02    1.00
  10  11  -5    3.19    0.76
 -10 -11   5    3.70    0.77
   9  11  -5    8.75    1.01
  -9 -11   5    8.35    0.97
   8  11  -5    9.50    0.98
  -8 -11   5   10.21    0.96
   7  11  -5    9.41    0.96
  -7 -11   5    8.78    0.90
   6  11  -5    5.20    0.73
  -6 -11   5    4.85    0.72
   5  11  -5    2.72    0.64
  -5 -11   5    1.98    0.56
   4  11  -5    0.37    0.43
  -4 -11   5    0.20    0.44
   3  11  -5   34.85    1.39
  -3 -11   5   33.54    1.35
   2  11  -5   40.58    1.47
  -2 -11   5   42.15    1.54
  -2 -11   5   42.61    1.16
   1  11  -5    1.16    0.45
  -1 -11   5    0.79    0.41
  -1 -11   5    0.34    0.29
   0  11  -5    4.49    0.58
   0 -11   5    5.77    0.65
   0 -11   5    5.43    0.56
   1 -11   5   47.31    1.50
   1 -11   5   45.98    1.60
   1 -11   5   46.64    1.48
   2 -11   5   46.30    1.46
   2 -11   5   48.29    1.61
   2 -11   5   45.81    1.60
   3 -11   5    1.00    0.50
   3 -11   5    0.63    0.45
   3 -11   5    0.98    0.39
  -4  11  -5   26.03    1.21
   4 -11   5   27.28    1.34
   4 -11   5   27.14    1.09
  -5  11  -5    0.70    0.50
   5 -11   5    1.11    0.53
  -6  11  -5    1.33    0.52
   6 -11   5    0.76    0.59
   7 -11   5    0.39    0.63
   8 -11   5    0.83    0.65
  11  10  -5    5.50    0.95
 -11 -10   5    6.50    0.90
  10  10  -5    4.82    0.87
 -10 -10   5    3.55    0.75
   9  10  -5    8.09    0.96
  -9 -10   5    6.77    0.91
   8  10  -5    3.18    0.74
  -8 -10   5    2.79    0.61
   7  10  -5   11.51    1.04
  -7 -10   5   10.71    0.97
   6  10  -5   -0.62    0.42
  -6 -10   5   -0.62    0.41
   5  10  -5    9.25    0.86
  -5 -10   5    7.56    0.75
   4  10  -5   14.49    0.91
  -4 -10   5   15.03    0.92
   3  10  -5    2.23    0.45
  -3 -10   5    2.31    0.53
   2  10  -5   28.28    1.15
  -2 -10   5   28.63    0.86
  -2 -10   5   27.64    1.16
   1  10  -5   21.89    1.02
  -1 -10   5   20.17    0.99
  -1 -10   5   22.31    0.84
   0  10  -5    0.37    0.37
   0 -10   5    0.09    0.31
   0 -10   5    0.39    0.40
   1 -10   5   62.30    1.75
   1 -10   5   63.88    1.87
   1 -10   5   62.80    1.75
   2 -10   5   51.85    1.64
   2 -10   5   51.48    1.57
   2 -10   5   51.80    1.65
   3 -10   5    7.25    0.77
   3 -10   5    7.36    0.73
   3 -10   5    8.11    0.65
  -4  10  -5    0.71    0.46
   4 -10   5    0.11    0.47
   4 -10   5    0.90    0.44
  -5  10  -5   27.36    1.21
   5 -10   5   27.64    1.37
   5 -10   5   28.22    1.15
  -6  10  -5    8.22    0.79
   6 -10   5    6.35    0.88
  -7  10  -5   11.15    0.94
   7 -10   5    7.97    1.07
   8 -10   5   11.18    1.22
   9 -10   5   -0.68    0.57
  11   9  -5   15.05    1.32
 -11  -9   5   14.86    1.21
  10   9  -5   23.84    1.40
 -10  -9   5   22.40    1.30
   9   9  -5   24.08    1.43
  -9  -9   5   23.46    1.29
   8   9  -5   45.56    1.78
  -8  -9   5   46.21    1.71
   7   9  -5    6.03    0.76
  -7  -9   5    6.55    0.79
   6   9  -5    2.44    0.56
  -6  -9   5    4.55    0.66
   5   9  -5    1.42    0.51
  -5  -9   5    2.72    0.54
   4   9  -5    0.16    0.41
  -4  -9   5    0.71    0.40
   3   9  -5   22.10    1.06
  -3  -9   5   20.61    0.58
  -3  -9   5   20.42    1.03
   2   9  -5    0.13    0.37
  -2  -9   5    0.01    0.38
  -2  -9   5    0.45    0.22
   1   9  -5    1.88    0.43
  -1  -9   5    2.52    0.49
  -1  -9   5    2.79    0.36
   0  -9   5    3.40    0.47
   0  -9   5    3.11    0.41
   0  -9   5    2.76    0.45
   1  -9   5   17.72    0.91
   1  -9   5   19.62    0.88
   1  -9   5   16.55    0.88
   2  -9   5    4.33    0.55
   2  -9   5    4.14    0.55
   2  -9   5    3.97    0.50
   3  -9   5   18.20    0.91
   3  -9   5   18.19    0.96
   3  -9   5   18.00    0.93
  -4   9  -5   12.13    0.82
   4  -9   5   11.24    0.89
   4  -9   5   11.19    0.76
  -5   9  -5    4.02    0.60
   5  -9   5    5.23    0.72
   5  -9   5    4.80    0.59
  -6   9  -5   -0.04    0.39
   6  -9   5   -0.16    0.46
   6  -9   5   -0.05    0.40
  -7   9  -5    2.71    0.57
   7  -9   5    3.28    0.78
   8  -9   5    7.14    1.02
   9  -9   5    0.57    0.69
  12   8  -5    8.02    1.11
 -12  -8   5    6.68    0.92
  11   8  -5    6.99    1.00
 -11  -8   5    6.82    0.88
  10   8  -5   30.81    1.60
 -10  -8   5   29.33    1.43
   9   8  -5    6.86    0.88
  -9  -8   5    8.22    0.88
   8   8  -5    7.10    0.82
  -8  -8   5    9.61    0.89
   7   8  -5    4.16    0.70
  -7  -8   5    3.88    0.64
   6   8  -5   10.63    0.87
  -6  -8   5    9.69    0.84
   5   8  -5    0.98    0.43
  -5  -8   5    1.01    0.42
   4   8  -5   11.52    0.80
  -4  -8   5   13.51    0.81
   3   8  -5    6.03    0.64
  -3  -8   5    6.04    0.61
   2   8  -5   54.28    1.63
  -2  -8   5   54.29    1.26
  -2  -8   5   57.45    1.65
   1   8  -5    0.93    0.40
  -1  -8   5    0.58    0.34
  -1  -8   5    1.18    0.27
   0  -8   5    0.09    0.26
   0  -8   5   -0.11    0.30
   0  -8   5   -0.30    0.27
   1  -8   5    6.41    0.57
   1  -8   5    5.72    0.53
   1  -8   5    6.11    0.58
   2  -8   5   25.13    0.97
   2  -8   5   25.95    1.02
   2  -8   5   24.01    0.99
   3  -8   5    0.82    0.35
   3  -8   5    0.72    0.38
   3  -8   5    0.33    0.36
  -4   8  -5    9.13    0.70
   4  -8   5    7.96    0.66
   4  -8   5    8.51    0.79
  -5   8  -5   17.05    0.93
   5  -8   5   16.08    1.03
   5  -8   5   18.32    0.87
  -6   8  -5    0.31    0.43
   6  -8   5    0.67    0.41
   6  -8   5    0.75    0.54
  -7   8  -5    5.71    0.68
   7  -8   5    5.30    0.66
   7  -8   5    5.23    0.81
   8  -8   5   25.34    1.45
   9  -8   5    4.53    0.89
  12   7  -5    2.47    0.77
 -12  -7   5    1.25    0.65
  11   7  -5   40.62    1.85
 -11  -7   5   39.88    1.69
  10   7  -5   -0.19    0.60
 -10  -7   5   -0.04    0.52
   9   7  -5    5.57    0.82
  -9  -7   5    4.07    0.68
   8   7  -5    0.14    0.52
  -8  -7   5    0.72    0.44
   7   7  -5    6.98    0.79
  -7  -7   5    4.63    0.67
   6   7  -5    3.36    0.55
  -6  -7   5    3.48    0.56
   5   7  -5   19.46    1.00
  -5  -7   5   20.99    0.98
   4   7  -5    2.53    0.50
  -4  -7   5    2.76    0.48
   3   7  -5    0.16    0.36
  -3  -7   5    0.06    0.31
   2   7  -5   40.00    1.30
  -2  -7   5   42.14    1.31
  -2  -7   5   42.25    0.98
   1   7  -5    1.05    0.36
  -1  -7   5    1.03    0.35
  -1  -7   5    1.04    0.24
  -1  -7   5    1.12    0.34
   0  -7   5    0.08    0.29
   0  -7   5    0.27    0.25
   0  -7   5    0.30    0.30
   1  -7   5   35.86    1.16
   1  -7   5   36.02    1.14
   1  -7   5   35.07    1.12
   2  -7   5   31.33    1.07
   2  -7   5   30.98    1.07
   2  -7   5   29.79    1.11
   3  -7   5    5.98    0.55
   3  -7   5    4.97    0.57
   3  -7   5    6.05    0.56
  -4   7  -5    3.47    0.47
   4  -7   5    3.23    0.58
   4  -7   5    3.83    0.51
  -5   7  -5   33.34    1.19
   5  -7   5   29.97    1.15
   5  -7   5   32.99    1.35
  -6   7  -5    4.22    0.57
   6  -7   5    3.59    0.55
   6  -7   5    3.38    0.67
  -7   7  -5    5.62    0.67
   7  -7   5    6.72    0.72
   7  -7   5    6.83    0.85
   8  -7   5    1.41    0.48
   8  -7   5    0.10    0.60
   9  -7   5    9.28    1.08
  10  -7   5    1.06    0.62
  12   6  -5    7.31    1.00
 -12  -6   5    8.22    0.99
  11   6  -5    3.69    0.80
 -11  -6   5    2.71    0.69
  10   6  -5    0.91    0.63
 -10  -6   5    1.83    0.59
   9   6  -5    0.40    0.57
  -9  -6   5    1.46    0.52
   8   6  -5    0.32    0.47
  -8  -6   5    0.69    0.49
   7   6  -5   27.77    1.25
  -7  -6   5   29.06    1.26
   6   6  -5   14.32    0.91
  -6  -6   5   17.05    0.91
   5   6  -5    4.41    0.59
  -5  -6   5    4.95    0.57
   4   6  -5  147.67    3.30
  -4  -6   5  141.41    3.23
   3   6  -5    5.23    0.53
  -3  -6   5    5.14    0.54
   2   6  -5   25.94    1.03
   2   6  -5   26.23    0.66
  -2  -6   5   25.43    1.00
  -1  -6   5   24.64    0.73
  -1  -6   5   23.70    0.91
  -1  -6   5   24.44    0.91
   0  -6   5    0.77    0.34
   0  -6   5    0.65    0.27
   0  -6   5    0.39    0.33
   1  -6   5    5.60    0.48
   1  -6   5    5.92    0.53
   1  -6   5    5.29    0.47
   2  -6   5    9.08    0.63
   2  -6   5   10.43    0.61
   2  -6   5    9.90    0.63
   3  -6   5    0.46    0.30
   3  -6   5    0.79    0.35
   3  -6   5    0.23    0.31
  -4   6  -5   11.10    0.65
   4  -6   5   12.80    0.74
   4  -6   5   12.53    0.87
  -5   6  -5    0.43    0.32
   5  -6   5   -0.05    0.32
   5  -6   5    0.13    0.41
  -6   6  -5   14.36    0.82
   6  -6   5   11.71    0.97
   6  -6   5   13.94    0.87
  -7   6  -5    1.38    0.45
   7  -6   5    0.46    0.55
   7  -6   5    1.36    0.48
   8  -6   5   15.52    1.27
   8  -6   5   19.33    1.06
   9  -6   5    6.90    0.78
   9  -6   5    6.24    0.91
  10  -6   5   -0.34    0.57
  12   5  -5    0.61    0.68
 -12  -5   5    0.78    0.62
  11   5  -5    7.90    0.98
 -11  -5   5    7.15    0.91
  10   5  -5    5.77    0.89
 -10  -5   5    5.06    0.80
   9   5  -5    8.22    0.90
  -9  -5   5    9.21    0.88
   8   5  -5   30.75    1.37
  -8  -5   5   28.17    1.26
   7   5  -5    7.19    0.74
  -7  -5   5    5.64    0.67
   6   5  -5   15.07    0.93
  -6  -5   5   13.91    0.46
  -6  -5   5   15.02    0.89
   5   5  -5   79.12    2.10
  -5  -5   5   76.86    2.04
   4   5  -5    3.46    0.48
  -4  -5   5    4.72    0.54
   3   5  -5    1.68    0.38
  -3  -5   5    1.69    0.36
   2   5  -5   66.63    1.74
   2   5  -5   66.31    1.35
  -2  -5   5   65.21    1.68
  -1  -5   5   56.84    1.54
  -1  -5   5   58.23    1.51
  -1  -5   5   58.86    1.31
   0  -5   5   -0.16    0.27
   0  -5   5   -0.15    0.24
   0  -5   5    0.15    0.30
   1  -5   5   27.60    0.90
   1  -5   5   27.98    0.92
   1  -5   5   27.29    0.94
   2  -5   5    3.81    0.44
   2  -5   5    4.10    0.45
   2  -5   5    3.78    0.39
   3  -5   5    3.75    0.41
   3  -5   5    3.68    0.45
   3  -5   5    4.14    0.51
  -4   5  -5    5.93    0.49
   4  -5   5    7.26    0.60
   4  -5   5    6.25    0.65
  -5   5  -5    2.18    0.39
   5  -5   5    2.14    0.53
   5  -5   5    1.87    0.42
  -6   5  -5    0.66    0.34
   6  -5   5    0.32    0.37
   6  -5   5    0.21    0.42
  -7   5  -5   33.80    1.18
   7  -5   5   31.85    1.44
   7  -5   5   31.07    1.26
   8  -5   5    5.50    0.69
   8  -5   5    5.53    0.84
   9  -5   5    5.82    0.76
   9  -5   5    3.30    0.74
  10  -5   5    1.15    0.65
  10  -5   5    1.24    0.59
  11  -5   5    1.00    0.75
  12   4  -5    0.55    0.59
 -12  -4   5    0.73    0.60
  11   4  -5    0.41    0.62
 -11  -4   5    2.05    0.67
  10   4  -5    0.98    0.59
 -10  -4   5    1.19    0.60
   9   4  -5    1.54    0.59
  -9  -4   5    1.45    0.54
   8   4  -5   24.57    1.22
  -8  -4   5   25.11    1.18
   7   4  -5    5.64    0.42
   7   4  -5    4.81    0.62
  -7  -4   5    4.64    0.66
   6   4  -5    4.75    0.57
   6   4  -5    5.31    0.38
  -6  -4   5    4.62    0.57
   5   4  -5   11.26    0.74
   5   4  -5   12.06    0.41
  -5  -4   5   11.44    0.79
   4   4  -5   63.69    1.73
  -4  -4   5   66.80    1.74
  -3  -4   5   24.38    0.95
   2   4  -5    0.25    0.32
   2   4  -5    0.61    0.14
  -2  -4   5    0.39    0.30
   1   4  -5    0.35    0.20
  -1  -4   5    0.24    0.28
  -1  -4   5   -0.18    0.26
   0  -4   5    0.67    0.26
   0  -4   5    0.20    0.26
   0  -4   5   -0.23    0.29
   1  -4   5    6.30    0.48
   1  -4   5    6.55    0.50
   1  -4   5    7.91    0.52
   2  -4   5    2.94    0.41
   2  -4   5    3.55    0.37
   2  -4   5    3.18    0.40
   3  -4   5    2.24    0.40
   3  -4   5    2.10    0.44
  -4   4  -5   40.11    1.11
   4  -4   5   40.98    1.39
   4  -4   5   40.25    1.27
  -5   4  -5    0.09    0.27
   5  -4   5    0.08    0.39
   5  -4   5    0.19    0.32
  -6   4  -5    4.41    0.47
   6  -4   5    4.40    0.54
   6  -4   5    4.65    0.64
  -7   4  -5   -0.37    0.32
   7  -4   5   -0.22    0.47
   7  -4   5    0.21    0.38
   8  -4   5    3.65    0.60
   8  -4   5    3.54    0.72
   9  -4   5   -0.16    0.48
   9  -4   5    0.09    0.53
  10  -4   5    1.92    0.60
  10  -4   5    1.86    0.70
  11  -4   5    1.68    0.59
  11  -4   5    1.13    0.62
  12   3  -5    2.83    0.69
 -12  -3   5    3.59    0.78
  11   3  -5    2.82    0.73
 -11  -3   5    2.43    0.68
  10   3  -5    0.66    0.59
 -10  -3   5    0.60    0.56
   9   3  -5   11.36    0.96
  -9  -3   5   10.83    0.96
   8   3  -5   39.92    1.50
   8   3  -5   40.03    1.22
  -8  -3   5   36.09    1.49
   7   3  -5   13.90    0.66
   7   3  -5   12.57    0.88
  -7  -3   5   12.91    0.94
   6   3  -5    0.39    0.24
   6   3  -5    1.14    0.38
  -6  -3   5    0.46    0.36
   5   3  -5    2.84    0.27
   5   3  -5    2.77    0.46
  -5  -3   5    2.45    0.45
   4   3  -5    4.29    0.29
   4   3  -5    4.98    0.49
  -4  -3   5    4.77    0.51
   3   3  -5   51.31    1.41
  -3  -3   5   50.64    1.41
   2   3  -5   19.63    0.52
   2   3  -5   21.10    0.81
  -2  -3   5   19.76    0.81
   1   3  -5    4.44    0.30
  -1  -3   5    4.67    0.42
  -1  -3   5    3.08    0.39
   0   3  -5    1.00    0.27
   0  -3   5    1.01    0.28
   0  -3   5    0.91    0.31
   1  -3   5    0.25    0.24
   1  -3   5    0.06    0.24
   1  -3   5   -0.17    0.27
   2  -3   5   12.34    0.55
   2  -3   5   13.67    0.70
   2  -3   5   14.19    0.66
  -3   3  -5    0.73    0.23
   3  -3   5    0.63    0.32
   3  -3   5    0.62    0.33
  -4   3  -5   79.48    1.77
   4  -3   5   81.42    2.10
   4  -3   5   80.65    2.01
  -5   3  -5    2.62    0.33
   5  -3   5    2.12    0.45
   5  -3   5    2.19    0.42
  -6   3  -5    0.53    0.29
   6  -3   5   -0.32    0.40
   6  -3   5    0.20    0.35
  -7   3  -5    0.77    0.34
   7  -3   5    0.31    0.41
   7  -3   5    0.66    0.48
   8  -3   5    1.58    0.61
   8  -3   5    1.32    0.47
   9  -3   5    8.23    0.83
   9  -3   5   11.44    1.09
  10  -3   5    3.10    0.65
  10  -3   5    3.31    0.74
  11  -3   5    1.25    0.67
  11  -3   5    1.59    0.67
  12   2  -5    0.59    0.61
 -12  -2   5   -0.18    0.58
  11   2  -5    1.15    0.58
 -11  -2   5    0.68    0.60
  10   2  -5    0.21    0.51
 -10  -2   5    0.75    0.58
   9   2  -5    0.37    0.37
   9   2  -5   -0.01    0.49
  -9  -2   5   -0.43    0.46
   8   2  -5   21.14    0.92
   8   2  -5   18.93    1.06
  -8  -2   5   20.17    1.14
   7   2  -5   62.63    1.87
   7   2  -5   65.50    1.66
  -7  -2   5   66.35    1.92
   6   2  -5   23.90    1.03
   6   2  -5   23.05    0.80
  -6  -2   5   22.62    1.01
   5   2  -5    2.41    0.41
   5   2  -5    2.31    0.29
  -5  -2   5    1.77    0.42
   4   2  -5   46.18    1.35
   4   2  -5   47.49    1.10
   3   2  -5   -0.05    0.28
   3   2  -5    0.37    0.18
  -3  -2   5    0.04    0.28
   2   2  -5    5.70    0.48
   2   2  -5    6.45    0.32
  -2  -2   5    5.62    0.46
   1   2  -5  189.22    3.62
  -1  -2   5  186.32    3.70
  -1  -2   5  184.45    3.78
   0   2  -5    5.96    0.39
   0  -2   5    5.66    0.40
   0  -2   5    5.63    0.47
  -1   2  -5    7.37    0.50
   1  -2   5    9.34    0.56
   1  -2   5    8.31    0.44
   2  -2   5   14.33    0.72
   2  -2   5   13.81    0.70
   2  -2   5   13.60    0.49
  -3   2  -5   65.61    1.41
   3  -2   5   65.63    1.71
   3  -2   5   64.33    1.65
  -4   2  -5    6.98    0.42
   4  -2   5    6.69    0.57
   4  -2   5    6.96    0.64
  -5   2  -5   59.08    1.40
   5  -2   5   61.48    1.69
   5  -2   5   60.84    1.75
  -6   2  -5   11.27    0.57
   6  -2   5   10.81    0.76
   6  -2   5    9.40    0.78
  -7   2  -5    0.42    0.29
   7  -2   5    0.90    0.40
   7  -2   5    0.52    0.46
   8  -2   5    0.27    0.42
   8  -2   5   -0.70    0.43
   9  -2   5    0.44    0.50
   9  -2   5    0.75    0.58
  10  -2   5   11.96    1.14
  10  -2   5   11.85    1.01
 -11   2  -5   20.32    1.32
  11  -2   5   19.95    1.21
  11  -2   5   20.77    1.34
  12   1  -5    0.82    0.56
 -12  -1   5    0.96    0.65
  11   1  -5    5.56    0.81
 -11  -1   5    6.54    0.89
  10   1  -5    3.07    0.63
 -10  -1   5    2.03    0.63
   9   1  -5    1.99    0.57
   9   1  -5    2.10    0.50
  -9  -1   5    1.38    0.56
   8   1  -5   44.30    1.40
   8   1  -5   43.11    1.51
  -8  -1   5   41.05    1.59
   7   1  -5   10.40    0.77
   7   1  -5    9.59    0.66
  -7  -1   5    8.78    0.78
   6   1  -5    8.32    0.56
   6   1  -5    8.16    0.65
  -6  -1   5    8.10    0.70
   5   1  -5    5.18    0.52
   5   1  -5    5.63    0.43
  -5  -1   5    5.18    0.55
   4   1  -5   10.42    0.50
   4   1  -5   11.23    0.61
  -4  -1   5   11.33    0.72
   3   1  -5   80.71    1.69
   3   1  -5   78.53    1.86
  -3  -1   5   78.65    1.88
   2   1  -5  158.04    3.09
   2   1  -5  157.35    3.24
  -2  -1   5  158.04    3.22
   1   1  -5   49.52    1.14
  -1  -1   5   51.88    1.24
  -1  -1   5   49.29    1.26
   0   1  -5    0.96    0.27
   0  -1   5    0.92    0.24
   0  -1   5    0.74    0.31
  -1   1  -5  426.67    8.18
   1  -1   5  437.79    8.20
   1  -1   5  420.88    7.88
  -2   1  -5   15.00    0.73
   2  -1   5   14.39    0.73
   2  -1   5   13.90    0.43
  -3   1  -5    5.81    0.50
  -3   1  -5    6.42    0.32
   3  -1   5    5.08    0.48
   3  -1   5    6.46    0.53
  -4   1  -5  299.53    5.61
   4  -1   5  299.57    6.09
   4  -1   5  302.08    6.03
  -5   1  -5   25.68    0.74
   5  -1   5   24.72    1.01
   5  -1   5   26.47    1.08
  -6   1  -5    0.02    0.23
   6  -1   5    0.35    0.37
   6  -1   5   -0.42    0.35
  -7   1  -5    9.81    0.58
   7  -1   5   10.33    0.82
   7  -1   5    8.60    0.79
   8  -1   5    2.33    0.61
   8  -1   5    2.26    0.54
   9  -1   5    9.37    0.88
   9  -1   5   10.21    0.97
 -10   1  -5    2.94    0.76
  10  -1   5    4.21    0.71
 -11   1  -5    4.49    0.83
  11  -1   5    5.51    0.81
 -12   1  -5    0.63    0.72
  12  -1   5   -0.46    0.55
 -12   0   5    1.27    0.65
  11   0  -5    5.85    0.75
 -11   0   5    4.90    0.84
  10   0  -5   16.34    1.06
  10   0  -5   16.33    1.08
 -10   0   5   15.12    1.18
   9   0  -5   10.42    0.83
   9   0  -5   10.55    0.86
  -9   0   5   10.03    0.92
   8   0  -5    0.38    0.41
   8   0  -5   -0.11    0.35
  -8   0   5    0.54    0.45
   7   0  -5   30.65    1.15
   7   0  -5   29.97    1.08
  -7   0   5   30.45    1.29
   6   0  -5    5.63    0.55
   6   0  -5    6.24    0.52
  -6   0   5    5.19    0.59
   5   0  -5   18.08    0.80
   5   0  -5   18.50    0.76
  -5   0   5   19.56    0.93
   4   0  -5   73.10    1.75
   4   0  -5   72.30    1.68
  -4   0   5   72.55    1.84
   3   0  -5   15.43    0.68
   3   0  -5   15.45    0.60
  -3   0   5   13.61    0.72
   2   0  -5    6.53    0.45
   2   0  -5    6.97    0.46
  -2   0   5    7.46    0.52
   1   0  -5    0.46    0.24
  -1   0   5    0.59    0.27
  -1   0   5    0.41    0.27
   0   0  -5   13.73    0.59
   0   0   5   14.31    0.59
   0   0   5   13.81    0.51
  -1   0  -5   15.05    0.70
   1   0   5   15.64    0.65
   1   0   5   15.23    0.45
  -2   0  -5  135.75    2.88
   2   0   5  134.45    2.86
  -3   0  -5   -0.19    0.28
   3   0   5    0.15    0.28
  -4   0  -5    0.96    0.18
  -4   0  -5    0.67    0.33
   4   0   5    0.72    0.32
  -5   0  -5    1.67    0.22
  -5   0  -5    1.05    0.41
   5   0   5    1.16    0.35
  -6   0  -5    2.19    0.30
  -6   0  -5    1.73    0.44
   6   0   5    1.74    0.42
   6   0   5    2.21    0.43
  -7   0  -5   31.37    1.25
  -7   0  -5   27.47    0.88
   7   0   5   29.43    1.21
   7   0   5   29.12    1.21
  -8   0  -5    4.98    0.68
   8   0   5    5.62    0.69
  -9   0  -5    2.82    0.62
   9   0   5    3.05    0.60
 -10   0  -5    1.28    0.62
  10   0   5    1.09    0.52
 -11   0  -5   28.21    1.45
  11   0   5   26.12    1.42
 -12   0  -5    1.38    0.70
  12   0   5    1.70    0.63
 -12   1   5    3.55    0.79
  11  -1  -5    8.07    0.89
 -11   1   5    7.19    0.97
  10  -1  -5    1.15    0.54
  10  -1  -5    1.07    0.54
 -10   1   5    1.77    0.60
   9  -1  -5   14.16    0.95
   9  -1  -5   13.46    0.94
  -9   1   5   12.95    1.07
   8  -1  -5   14.65    0.87
   8  -1  -5   16.88    0.96
  -8   1   5   16.64    1.06
   7  -1  -5    8.24    0.69
   7  -1  -5    8.67    0.68
  -7   1   5    7.66    0.75
   6  -1  -5    2.13    0.43
   6  -1  -5    2.34    0.39
  -6   1   5    3.75    0.53
   5  -1  -5    0.47    0.29
   5  -1  -5    0.84    0.31
  -5   1   5    0.55    0.35
   4  -1  -5   14.27    0.66
   4  -1  -5   15.39    0.67
  -4   1   5   14.58    0.76
   3  -1  -5   10.62    0.55
   3  -1  -5    9.61    0.54
  -3   1   5   10.23    0.62
   2  -1  -5   43.99    1.11
   2  -1  -5   44.40    1.12
  -2   1   5   42.86    1.20
   1  -1  -5    1.40    0.28
  -1   1   5    0.75    0.26
  -1   1   5    0.83    0.26
   0  -1  -5    7.93    0.53
   0   1   5    8.24    0.42
   0   1   5    8.62    0.48
  -1  -1  -5   34.95    0.96
   1   1   5   33.80    0.76
   1   1   5   33.20    0.99
  -2  -1  -5    1.54    0.33
   2   1   5    2.05    0.33
  -3  -1  -5   19.61    0.80
   3   1   5   19.72    0.78
  -4  -1  -5    5.01    0.49
  -4  -1  -5    5.21    0.26
   4   1   5    5.18    0.49
  -5  -1  -5    9.54    0.40
  -5  -1  -5    9.47    0.67
   5   1   5    9.10    0.66
  -6  -1  -5   19.11    0.92
  -6  -1  -5   20.66    0.65
   6   1   5   17.51    0.89
  -7  -1  -5   32.04    0.95
  -7  -1  -5   32.73    1.27
   7   1   5   33.45    1.27
  -8  -1  -5    1.94    0.54
   8   1   5    2.47    0.55
  -9  -1  -5    8.36    0.84
   9   1   5    6.82    0.77
 -10  -1  -5    0.85    0.60
  10   1   5    1.48    0.60
 -11  -1  -5    3.13    0.70
  11   1   5    1.79    0.65
 -12  -1  -5    5.97    0.97
  12   1   5    6.60    0.92
  11  -2  -5   -0.22    0.51
 -11   2   5    1.13    0.63
  10  -2  -5   13.94    1.09
 -10   2   5   13.50    1.11
   9  -2  -5    8.50    0.84
   9  -2  -5    8.85    0.78
  -9   2   5   10.26    0.99
   8  -2  -5    9.91    0.81
   8  -2  -5   10.00    0.75
  -8   2   5    8.34    0.85
   7  -2  -5   -0.11    0.36
   7  -2  -5    0.54    0.37
  -7   2   5    0.09    0.44
   6  -2  -5    5.06    0.55
   6  -2  -5    5.60    0.50
  -6   2   5    6.13    0.65
   5  -2  -5    7.96    0.53
   5  -2  -5    7.92    0.60
  -5   2   5    7.98    0.68
   4  -2  -5  136.31    2.83
   4  -2  -5  138.84    2.96
  -4   2   5  133.10    3.00
   3  -2  -5    6.30    0.47
   3  -2  -5    6.53    0.41
  -3   2   5    6.61    0.55
   2  -2  -5   34.75    1.00
   2  -2  -5   34.16    0.90
  -2   2   5   35.70    1.06
   1  -2  -5  333.52    6.43
  -1   2   5  333.45    6.32
  -1   2   5  333.86    6.33
   0  -2  -5    9.61    0.61
   0   2   5    9.54    0.47
   0   2   5   10.28    0.51
  -1  -2  -5    0.71    0.31
   1   2   5    0.57    0.26
   1   2   5    1.01    0.19
  -2  -2  -5   17.98    0.74
   2   2   5   20.05    0.78
  -3  -2  -5    7.30    0.53
   3   2   5    8.49    0.58
  -4  -2  -5   31.71    1.11
  -4  -2  -5   32.65    0.72
   4   2   5   30.75    1.05
  -5  -2  -5    0.34    0.18
  -5  -2  -5    0.08    0.34
   5   2   5    0.28    0.32
  -6  -2  -5   12.34    0.50
  -6  -2  -5   10.48    0.71
   6   2   5   10.74    0.73
  -7  -2  -5    0.04    0.35
  -7  -2  -5   -0.22    0.22
   7   2   5    0.52    0.38
  -8  -2  -5   28.96    0.94
  -8  -2  -5   30.09    1.31
   8   2   5   28.12    1.22
  -9  -2  -5    0.25    0.44
   9   2   5    0.89    0.52
 -10  -2  -5   17.02    1.15
  10   2   5   15.44    1.06
 -11  -2  -5   12.89    1.12
  11   2   5    9.62    1.00
 -12  -2  -5    7.83    1.01
  12   2   5    7.57    1.03
  11  -3  -5    8.45    0.98
 -11   3   5    6.36    0.89
  10  -3  -5    1.24    0.57
 -10   3   5   -0.07    0.54
   9  -3  -5   -0.13    0.46
  -9   3   5    0.78    0.57
   8  -3  -5    5.77    0.69
   8  -3  -5    5.48    0.59
  -8   3   5    5.59    0.77
   7  -3  -5    0.34    0.41
   7  -3  -5   -0.13    0.30
  -7   3   5    0.51    0.47
   6  -3  -5    2.82    0.49
   6  -3  -5    2.63    0.38
  -6   3   5    3.41    0.53
   5  -3  -5   46.86    1.25
   5  -3  -5   47.62    1.44
  -5   3   5   47.93    1.51
   4  -3  -5    1.71    0.27
   4  -3  -5    2.30    0.41
  -4   3   5    2.27    0.40
   3  -3  -5   10.25    0.63
   3  -3  -5   11.03    0.48
  -3   3   5    8.79    0.61
   2  -3  -5   65.91    1.63
   2  -3  -5   69.52    1.44
  -2   3   5   66.31    1.62
   1  -3  -5   10.67    0.58
  -1   3   5   11.08    0.46
  -1   3   5   12.17    0.57
   0  -3  -5    3.29    0.39
   0   3   5    3.77    0.31
   0   3   5    3.68    0.33
  -1  -3  -5  114.53    2.44
   1   3   5  116.50    2.40
   1   3   5  111.12    2.25
  -2  -3  -5   54.72    1.42
   2   3   5   57.75    1.40
   2   3   5   56.11    1.17
  -3  -3  -5    8.43    0.57
  -3  -3  -5    8.36    0.33
   3   3   5    9.22    0.60
  -4  -3  -5   19.76    0.83
  -4  -3  -5   20.61    0.55
   4   3   5   21.18    0.86
  -5  -3  -5    5.17    0.52
  -5  -3  -5    5.29    0.33
   5   3   5    4.71    0.53
  -6  -3  -5    0.38    0.22
  -6  -3  -5    0.50    0.33
   6   3   5   -0.03    0.32
  -7  -3  -5   77.29    1.77
  -7  -3  -5   80.81    2.18
   7   3   5   79.29    2.19
  -8  -3  -5    0.31    0.44
  -8  -3  -5    0.08    0.30
   8   3   5    0.87    0.46
  -9  -3  -5   17.67    1.03
   9   3   5   14.20    0.97
 -10  -3  -5    0.33    0.53
  10   3   5    1.08    0.55
 -11  -3  -5    3.34    0.68
  11   3   5    3.85    0.73
 -12  -3  -5    3.15    0.79
  12   3   5    4.42    0.82
  11  -4  -5    0.65    0.61
 -11   4   5    1.09    0.66
  10  -4  -5   -0.37    0.52
 -10   4   5    1.12    0.62
   9  -4  -5    1.48    0.58
  -9   4   5    2.32    0.67
   8  -4  -5   11.57    0.94
  -8   4   5   12.31    1.03
   7  -4  -5   -0.13    0.30
   7  -4  -5   -0.49    0.34
  -7   4   5   -0.20    0.36
   6  -4  -5   26.71    1.15
   6  -4  -5   26.67    0.91
  -6   4   5   27.39    1.21
   5  -4  -5   46.04    1.16
   5  -4  -5   43.92    1.44
  -5   4   5   43.27    1.42
   4  -4  -5   14.66    0.55
   4  -4  -5   14.27    0.79
  -4   4   5   15.05    0.80
   3  -4  -5   22.32    0.91
   3  -4  -5   21.68    0.62
  -3   4   5   21.25    0.86
   2  -4  -5    5.28    0.47
   2  -4  -5    5.56    0.31
  -2   4   5    5.86    0.50
   1  -4  -5   25.05    0.88
  -1   4   5   25.30    0.83
  -1   4   5   24.87    0.64
   0  -4  -5    0.73    0.30
   0   4   5    0.73    0.28
   0   4   5    0.98    0.23
  -1  -4  -5   13.94    0.67
   1   4   5   14.66    0.58
   1   4   5   15.84    0.60
  -2  -4  -5  123.55    2.69
  -2  -4  -5  126.29    2.48
   2   4   5  125.89    2.65
  -3  -4  -5    7.59    0.37
  -3  -4  -5    9.16    0.59
   3   4   5    7.59    0.55
  -4  -4  -5   28.99    0.75
  -4  -4  -5   29.30    1.00
   4   4   5   29.33    1.03
  -5  -4  -5    9.80    0.68
  -5  -4  -5   10.82    0.47
   5   4   5    9.65    0.68
  -6  -4  -5   38.30    1.01
  -6  -4  -5   40.81    1.31
   6   4   5   36.57    1.32
  -7  -4  -5    0.64    0.26
  -7  -4  -5    0.15    0.38
   7   4   5    0.14    0.36
  -8  -4  -5   21.54    1.09
  -8  -4  -5   20.84    0.80
   8   4   5   22.39    1.18
  -9  -4  -5   -0.20    0.45
   9   4   5   -0.29    0.44
 -10  -4  -5    0.43    0.48
  10   4   5    1.70    0.58
 -11  -4  -5    7.97    0.90
  11   4   5    8.54    0.98
 -12  -4  -5    7.17    0.87
  12   4   5    5.36    0.87
  11  -5  -5    4.29    0.83
 -11   5   5    5.14    0.90
  10  -5  -5    2.03    0.66
 -10   5   5    5.13    0.83
   9  -5  -5   17.54    1.18
  -9   5   5   17.70    1.20
   8  -5  -5   21.07    1.13
  -8   5   5   23.28    1.26
   7  -5  -5    6.71    0.73
  -7   5   5    6.12    0.73
   6  -5  -5    0.69    0.30
   6  -5  -5    0.88    0.43
  -6   5   5    0.54    0.42
   5  -5  -5   28.77    0.83
   5  -5  -5   28.90    1.18
  -5   5   5   28.91    1.16
   4  -5  -5    3.59    0.27
   4  -5  -5    3.96    0.51
  -4   5   5    3.17    0.48
   3  -5  -5    3.39    0.22
   3  -5  -5    3.39    0.48
  -3   5   5    3.55    0.45
   2  -5  -5   13.80    0.76
  -2   5   5   12.37    0.71
   1  -5  -5   56.36    1.50
  -1   5   5   55.22    1.15
  -1   5   5   55.26    1.42
   0  -5  -5    6.90    0.51
   0   5   5    6.94    0.48
   0   5   5    7.62    0.41
  -1  -5  -5    0.31    0.31
   1   5   5    0.18    0.24
   1   5   5    0.48    0.26
  -2  -5  -5   50.68    1.21
   2   5   5   51.34    1.32
  -3  -5  -5    5.40    0.46
  -3  -5  -5    5.94    0.38
   3   5   5    5.24    0.49
  -4  -5  -5   47.10    1.13
  -4  -5  -5   48.13    1.38
   4   5   5   48.81    1.41
  -5  -5  -5    7.11    0.60
  -5  -5  -5    7.06    0.44
   5   5   5    7.70    0.63
  -6  -5  -5    2.96    0.49
  -6  -5  -5    3.62    0.36
   6   5   5    3.17    0.51
  -7  -5  -5    8.16    0.68
  -7  -5  -5    6.95    0.48
   7   5   5    7.64    0.75
  -8  -5  -5    8.17    0.76
  -8  -5  -5    7.71    0.57
   8   5   5    7.45    0.78
  -9  -5  -5    4.41    0.68
   9   5   5    5.05    0.76
 -10  -5  -5    2.20    0.64
  10   5   5    3.65    0.76
 -11  -5  -5    0.44    0.58
  11   5   5    1.46    0.59
 -12  -5  -5    0.45    0.64
  12   5   5    0.72    0.65
  11  -6  -5   -0.26    0.63
 -11   6   5    0.31    0.62
  10  -6  -5    0.41    0.74
 -10   6   5    0.21    0.65
   9  -6  -5    1.39    0.64
  -9   6   5    2.15    0.67
   8  -6  -5    9.78    0.95
  -8   6   5    9.36    0.92
   7  -6  -5    6.38    0.75
  -7   6   5    6.06    0.76
   6  -6  -5   17.64    1.06
  -6   6   5   20.60    1.10
   5  -6  -5    7.07    0.38
   5  -6  -5    5.28    0.65
  -5   6   5    5.73    0.63
   4  -6  -5   36.39    1.32
   4  -6  -5   39.11    0.85
  -4   6   5   37.87    1.30
   3  -6  -5    0.23    0.31
  -3   6   5    0.40    0.36
   2  -6  -5    4.93    0.51
  -2   6   5    5.15    0.50
   1  -6  -5   24.26    0.96
  -1   6   5   24.68    0.89
   0  -6  -5    7.65    0.56
   0   6   5    8.30    0.40
   0   6   5    9.15    0.61
  -1  -6  -5   30.86    1.02
   1   6   5   32.00    0.89
   1   6   5   32.76    0.98
  -2  -6  -5    8.62    0.54
  -2  -6  -5    8.94    0.60
   2   6   5    8.21    0.50
  -3  -6  -5   28.94    0.86
  -3  -6  -5   27.61    0.95
   3   6   5   28.82    0.97
  -4  -6  -5   40.60    1.07
  -4  -6  -5   39.08    1.19
   4   6   5   40.58    1.29
  -5  -6  -5   29.50    1.08
  -5  -6  -5   30.04    0.89
   5   6   5   29.68    1.12
  -6  -6  -5   22.33    0.97
  -6  -6  -5   20.86    0.75
   6   6   5   20.50    0.99
  -7  -6  -5    4.35    0.58
  -7  -6  -5    4.74    0.44
   7   6   5    4.45    0.62
  -8  -6  -5   -0.03    0.41
  -8  -6  -5    0.36    0.30
   8   6   5    0.14    0.42
  -9  -6  -5    2.16    0.54
   9   6   5    1.51    0.56
 -10  -6  -5    4.97    0.69
  10   6   5    6.29    0.86
 -11  -6  -5    1.16    0.54
  11   6   5    1.23    0.58
 -12  -6  -5    1.31    0.61
  12   6   5   -0.41    0.53
  10  -7  -5    4.11    0.82
 -10   7   5    4.57    0.83
   9  -7  -5    6.86    0.89
  -9   7   5    6.21    0.87
   8  -7  -5   28.02    1.43
  -8   7   5   30.18    1.45
   7  -7  -5   10.02    0.92
  -7   7   5   11.48    1.01
   6  -7  -5    7.54    0.78
  -6   7   5    7.15    0.77
   5  -7  -5   12.24    0.85
  -5   7   5   10.53    0.86
   4  -7  -5    7.44    0.68
  -4   7   5    8.78    0.73
   3  -7  -5    0.24    0.33
  -3   7   5   -0.23    0.32
   2  -7  -5   30.67    1.11
  -2   7   5   29.96    1.08
   1  -7  -5    8.95    0.66
  -1   7   5    8.91    0.64
   0  -7  -5   27.23    1.02
   0   7   5   27.06    0.72
   0   7   5   25.57    0.96
  -1  -7  -5   13.95    0.70
   1   7   5   14.05    0.59
   1   7   5   14.19    0.69
  -2  -7  -5   15.03    0.76
  -2  -7  -5   14.26    0.67
   2   7   5   14.03    0.66
  -3  -7  -5   16.62    0.70
  -3  -7  -5   15.02    0.73
   3   7   5   16.60    0.78
  -4  -7  -5   73.49    1.71
  -4  -7  -5   72.86    1.84
   4   7   5   74.03    1.91
  -5  -7  -5   79.74    1.86
  -5  -7  -5   81.87    2.03
   5   7   5   80.15    2.11
  -6  -7  -5    1.10    0.31
  -6  -7  -5    1.32    0.39
   6   7   5    1.09    0.44
  -7  -7  -5    4.86    0.60
  -7  -7  -5    6.07    0.50
   7   7   5    4.66    0.64
  -8  -7  -5    4.27    0.61
  -8  -7  -5    3.99    0.48
   8   7   5    3.69    0.66
  -9  -7  -5    5.14    0.67
   9   7   5    4.79    0.79
 -10  -7  -5   16.43    1.09
  10   7   5   11.81    1.08
 -11  -7  -5   -0.64    0.49
  11   7   5    0.15    0.60
 -12  -7  -5    0.13    0.55
  12   7   5    1.26    0.72
  10  -8  -5    4.70    0.88
 -10   8   5    4.17    0.90
   9  -8  -5    2.29    0.72
  -9   8   5    2.07    0.70
   8  -8  -5    9.12    0.96
  -8   8   5    9.57    1.00
   7  -8  -5    0.73    0.49
  -7   8   5    0.09    0.52
   6  -8  -5    1.74    0.51
  -6   8   5    1.87    0.54
   5  -8  -5    6.78    0.75
  -5   8   5    6.54    0.74
   4  -8  -5    4.05    0.57
  -4   8   5    4.38    0.61
   3  -8  -5    6.49    0.68
  -3   8   5    7.08    0.68
   2  -8  -5   10.77    0.78
  -2   8   5   10.18    0.69
   1  -8  -5   40.99    1.31
  -1   8   5   38.58    1.25
   0  -8  -5    4.71    0.50
   0   8   5    5.66    0.37
   0   8   5    5.41    0.54
  -1  -8  -5   55.88    1.53
  -1  -8  -5   55.04    1.48
   1   8   5   54.31    1.34
  -2  -8  -5   57.91    1.51
  -2  -8  -5   57.50    1.58
   2   8   5   57.96    1.48
  -3  -8  -5    6.56    0.52
  -3  -8  -5    6.79    0.55
   3   8   5    6.84    0.55
  -4  -8  -5   10.19    0.69
  -4  -8  -5    9.33    0.59
   4   8   5    9.82    0.70
  -5  -8  -5   92.95    2.30
  -5  -8  -5   96.13    2.19
   5   8   5   96.00    2.40
  -6  -8  -5   21.48    0.95
  -6  -8  -5   21.49    0.86
   6   8   5   21.29    1.02
  -7  -8  -5   12.21    0.70
  -7  -8  -5   12.68    0.81
   7   8   5   13.61    0.91
  -8  -8  -5   20.25    0.90
  -8  -8  -5   18.85    0.99
   8   8   5   19.30    1.12
  -9  -8  -5    0.28    0.44
   9   8   5    0.08    0.48
 -10  -8  -5   10.72    0.91
  10   8   5   11.38    1.11
 -11  -8  -5   28.94    1.35
  11   8   5   27.98    1.57
  12   8   5    0.23    0.65
   9  -9  -5   -0.17    0.54
  -9   9   5    0.46    0.59
   8  -9  -5    9.07    1.02
  -8   9   5    9.77    1.03
   7  -9  -5   12.98    1.09
  -7   9   5   13.99    1.12
   6  -9  -5   -0.16    0.48
  -6   9   5    0.21    0.47
   5  -9  -5    0.46    0.49
  -5   9   5   -0.65    0.38
   4  -9  -5   -0.06    0.38
  -4   9   5   -0.43    0.35
   3  -9  -5    1.05    0.43
  -3   9   5    1.41    0.43
   2  -9  -5    3.91    0.53
  -2   9   5    4.28    0.56
   1  -9  -5    0.05    0.32
  -1   9   5    0.03    0.32
   0  -9  -5    7.59    0.64
   0   9   5    7.37    0.62
   0   9   5    8.00    0.39
  -1  -9  -5    8.69    0.64
  -1  -9  -5    7.97    0.65
   1   9   5    7.04    0.48
  -2  -9  -5    2.38    0.41
  -2  -9  -5    0.90    0.37
   2   9   5    2.21    0.35
  -3  -9  -5   12.54    0.68
  -3  -9  -5   11.74    0.69
   3   9   5   12.10    0.69
  -4  -9  -5   11.25    0.72
  -4  -9  -5   10.57    0.67
   4   9   5   11.35    0.75
  -5  -9  -5   20.08    0.86
  -5  -9  -5   20.64    0.92
   5   9   5   19.03    0.97
  -6  -9  -5    9.59    0.70
  -6  -9  -5   10.02    0.69
   6   9   5    8.62    0.79
  -7  -9  -5    1.13    0.38
  -7  -9  -5    1.29    0.45
   7   9   5    0.84    0.47
  -8  -9  -5    4.32    0.60
  -8  -9  -5    5.67    0.58
   8   9   5    3.41    0.64
  -9  -9  -5    7.45    0.69
  -9  -9  -5    7.18    0.75
   9   9   5    7.69    0.88
 -10  -9  -5    2.44    0.61
  10   9   5    2.03    0.67
  11   9   5    3.35    0.80
  12   9   5    0.13    0.62
   9 -10  -5    1.41    0.65
  -9  10   5    1.73    0.69
   8 -10  -5    7.46    0.95
  -8  10   5    9.63    1.06
   7 -10  -5    3.73    0.77
  -7  10   5    2.61    0.65
   6 -10  -5    9.97    0.98
  -6  10   5    9.35    0.92
   5 -10  -5    0.24    0.45
  -5  10   5    0.15    0.49
   4 -10  -5    1.06    0.52
  -4  10   5    0.81    0.52
   3 -10  -5    1.57    0.46
  -3  10   5    1.54    0.46
   2 -10  -5    0.66    0.40
  -2  10   5    1.44    0.47
   1 -10  -5   21.17    1.00
  -1  10   5   19.60    0.96
   0 -10  -5    2.13    0.45
   0  10   5    2.02    0.24
   0  10   5    1.27    0.39
  -1 -10  -5    0.69    0.39
  -1 -10  -5    1.12    0.42
   1  10   5    1.23    0.28
  -2 -10  -5   44.17    1.38
  -2 -10  -5   40.78    1.31
   2  10   5   41.67    1.21
  -3 -10  -5   11.00    0.73
  -3 -10  -5   11.56    0.69
   3  10   5   12.75    0.72
  -4 -10  -5    7.17    0.61
  -4 -10  -5    7.22    0.61
   4  10   5    8.33    0.68
  -5 -10  -5    7.68    0.64
  -5 -10  -5    5.97    0.58
   5  10   5    7.80    0.72
  -6 -10  -5    8.04    0.65
  -6 -10  -5    8.43    0.68
   6  10   5    7.10    0.75
  -7 -10  -5   14.88    0.82
  -7 -10  -5   16.44    0.90
   7  10   5   14.96    0.96
  -8 -10  -5   68.21    1.89
  -8 -10  -5   66.48    1.95
   8  10   5   67.37    2.17
  -9 -10  -5    1.90    0.52
  -9 -10  -5    2.25    0.48
   9  10   5    1.39    0.63
 -10 -10  -5    0.53    0.47
  10  10   5    0.55    0.58
  11  10   5   14.69    1.29
  12  10   5   10.44    1.21
   9 -11  -5   11.22    1.17
  -9  11   5    8.63    1.02
   8 -11  -5    0.05    0.52
  -8  11   5   -0.56    0.52
   7 -11  -5   10.52    1.05
  -7  11   5    9.36    0.98
   6 -11  -5    4.63    0.83
  -6  11   5    4.17    0.70
   5 -11  -5   -0.09    0.47
  -5  11   5    0.47    0.53
   4 -11  -5    0.91    0.52
  -4  11   5    0.18    0.47
   3 -11  -5   13.84    1.00
  -3  11   5   12.55    0.89
   2 -11  -5    0.27    0.45
  -2  11   5    0.14    0.43
   1 -11  -5    0.23    0.33
  -1  11   5    0.09    0.38
   0 -11  -5   11.17    0.75
   0  11   5   10.88    0.48
   0  11   5   12.28    0.83
  -1 -11  -5   26.13    1.05
  -1 -11  -5   25.14    1.05
   1  11   5   24.03    0.80
  -2 -11  -5    1.28    0.40
  -2 -11  -5    0.97    0.37
   2  11   5    1.89    0.36
  -3 -11  -5    6.12    0.58
  -3 -11  -5    6.14    0.58
   3  11   5    5.95    0.56
  -4 -11  -5   11.28    0.76
  -4 -11  -5   12.65    0.78
   4  11   5   12.52    0.75
  -5 -11  -5    0.28    0.34
  -5 -11  -5   -0.10    0.35
   5  11   5    0.49    0.41
  -6 -11  -5    3.22    0.49
  -6 -11  -5    2.32    0.49
   6  11   5    2.23    0.60
  -7 -11  -5   12.29    0.86
  -7 -11  -5   12.01    0.79
   7  11   5   10.13    0.90
  -8 -11  -5    2.07    0.48
  -8 -11  -5    1.88    0.49
   8  11   5    2.65    0.61
  -9 -11  -5   30.59    1.29
  -9 -11  -5   31.53    1.25
   9  11   5   32.66    1.55
  10  11   5    0.76    0.59
  11  11   5    1.60    0.69
   8 -12  -5    5.23    0.88
  -8  12   5    7.02    0.96
   7 -12  -5    4.16    0.77
  -7  12   5    3.11    0.75
   6 -12  -5    5.42    0.85
  -6  12   5    6.23    0.88
   5 -12  -5    7.34    0.89
  -5  12   5    9.04    0.90
   4 -12  -5    6.98    0.81
  -4  12   5    6.07    0.80
   3 -12  -5    0.91    0.46
  -3  12   5    1.52    0.50
   2 -12  -5   10.15    0.87
  -2  12   5   10.73    0.89
   1 -12  -5    0.44    0.39
  -1  12   5    0.88    0.48
   0 -12  -5    0.10    0.41
   0  12   5    0.18    0.38
  -1 -12  -5   12.33    0.88
  -1 -12  -5   11.32    0.83
   1  12   5   10.57    0.58
  -2 -12  -5    2.12    0.49
  -2 -12  -5    1.50    0.42
   2  12   5    2.02    0.38
  -3 -12  -5    0.87    0.40
  -3 -12  -5    1.20    0.44
   3  12   5    1.23    0.40
  -4 -12  -5   14.08    0.88
  -4 -12  -5   13.38    0.82
   4  12   5   14.16    0.86
  -5 -12  -5    6.69    0.68
  -5 -12  -5    7.09    0.65
   5  12   5    7.28    0.73
  -6 -12  -5    0.78    0.42
  -6 -12  -5    0.36    0.42
   6  12   5    0.33    0.46
  -7 -12  -5    0.46    0.39
  -7 -12  -5    0.26    0.42
   7  12   5    0.06    0.49
  -8 -12  -5   34.68    1.34
  -8 -12  -5   35.96    1.37
   8  12   5   36.85    1.59
  -9 -12  -5    0.06    0.43
   9  12   5   -0.26    0.48
  10  12   5    0.01    0.60
  11  12   5    0.40    0.61
   8 -13  -5    0.21    0.63
  -8  13   5   -0.46    0.46
   7 -13  -5    4.88    0.86
  -7  13   5    4.07    0.80
   6 -13  -5    2.43    0.70
  -6  13   5    2.49    0.70
   5 -13  -5   18.80    1.26
  -5  13   5   20.18    1.22
   4 -13  -5    3.66    0.70
  -4  13   5    5.32    0.78
   3 -13  -5    0.67    0.50
  -3  13   5    0.24    0.49
   2 -13  -5    0.63    0.49
  -2  13   5    0.88    0.48
   1 -13  -5    2.55    0.58
  -1  13   5    2.15    0.57
   0 -13  -5    0.09    0.43
   0  13   5    0.55    0.44
  -1 -13  -5    0.88    0.47
  -1 -13  -5    0.46    0.42
   1  13   5    1.15    0.31
  -2 -13  -5    6.52    0.66
  -2 -13  -5    6.13    0.68
   2  13   5    5.46    0.51
  -3 -13  -5   13.12    0.94
  -3 -13  -5   15.11    0.90
   3  13   5   14.45    0.84
  -4 -13  -5    1.80    0.47
  -4 -13  -5    2.58    0.52
   4  13   5    1.70    0.47
  -5 -13  -5    5.48    0.62
  -5 -13  -5    5.18    0.65
   5  13   5    5.59    0.69
  -6 -13  -5   -0.19    0.38
  -6 -13  -5   -0.02    0.37
   6  13   5   -0.16    0.44
  -7 -13  -5   15.23    0.93
  -7 -13  -5   15.07    0.88
   7  13   5   16.98    1.07
  -8 -13  -5    0.87    0.47
  -8 -13  -5    1.87    0.54
   8  13   5    1.07    0.56
  -9 -13  -5   31.37    1.35
   9  13   5   30.65    1.55
  10  13   5    5.22    0.87
  11  13   5    0.38    0.54
   7 -14  -5    0.12    0.60
  -7  14   5   -0.35    0.55
   6 -14  -5   10.82    1.15
  -6  14   5   10.26    1.07
   5 -14  -5    1.00    0.65
  -5  14   5    0.51    0.59
   4 -14  -5   12.37    1.14
  -4  14   5   13.54    1.15
   3 -14  -5    5.99    0.79
  -3  14   5    6.53    0.81
   2 -14  -5    3.57    0.65
  -2  14   5    5.37    0.74
   1 -14  -5    6.13    0.77
  -1  14   5    4.65    0.76
   0 -14  -5    6.54    0.72
   0  14   5    7.93    0.83
  -1 -14  -5   48.20    1.69
  -1 -14  -5   48.55    1.72
  -2 -14  -5    3.04    0.61
  -2 -14  -5    3.39    0.57
   2  14   5    3.40    0.46
  -3 -14  -5    3.24    0.58
  -3 -14  -5    3.66    0.57
   3  14   5    2.64    0.48
  -4 -14  -5    1.16    0.48
  -4 -14  -5    1.02    0.44
   4  14   5    1.64    0.48
  -5 -14  -5    5.21    0.71
  -5 -14  -5    7.88    0.71
   5  14   5    6.15    0.72
  -6 -14  -5    1.62    0.46
  -6 -14  -5    0.44    0.46
   6  14   5    1.06    0.50
  -7 -14  -5    0.84    0.46
  -7 -14  -5    0.13    0.48
   7  14   5    0.54    0.52
  -8 -14  -5   19.38    1.08
   8  14   5   18.43    1.18
  -9 -14  -5    5.96    0.75
   9  14   5    5.85    0.85
  10  14   5    1.29    0.61
  11  14   5    6.07    0.99
   6 -15  -5    0.56    0.64
  -6  15   5    0.67    0.63
   5 -15  -5   32.05    1.67
  -5  15   5   31.14    1.60
   4 -15  -5    8.82    0.99
  -4  15   5   11.85    1.12
   3 -15  -5    0.08    0.47
  -3  15   5    0.88    0.59
   2 -15  -5   13.45    1.11
  -2  15   5   11.67    1.05
   1 -15  -5   19.93    1.19
  -1  15   5   18.47    1.21
   0 -15  -5    8.87    0.87
   0  15   5    8.01    0.84
  -1 -15  -5   19.56    1.16
  -1 -15  -5   17.92    1.09
  -2 -15  -5   19.59    1.16
  -2 -15  -5   19.31    1.07
  -3 -15  -5    1.83    0.49
  -3 -15  -5    2.31    0.60
   3  15   5    2.21    0.47
  -4 -15  -5   27.49    1.20
  -4 -15  -5   29.20    1.29
   4  15   5   26.57    1.17
  -5 -15  -5    2.08    0.50
  -5 -15  -5    2.34    0.59
   5  15   5    1.30    0.53
  -6 -15  -5    0.03    0.42
  -6 -15  -5   -0.06    0.43
   6  15   5    0.11    0.47
  -7 -15  -5    1.51    0.55
   7  15   5    1.80    0.63
  -8 -15  -5   16.12    1.10
   8  15   5   16.94    1.20
  -9 -15  -5    1.88    0.58
   9  15   5    0.61    0.61
  10  15   5   14.71    1.27
   5 -16  -5    2.08    0.75
  -5  16   5    1.73    0.66
   4 -16  -5    9.21    1.04
  -4  16   5    7.42    0.92
   3 -16  -5    1.55    0.64
  -3  16   5    0.43    0.53
   2 -16  -5    2.08    0.60
  -2  16   5    2.69    0.66
   1 -16  -5   32.66    1.49
  -1  16   5   31.08    1.49
   0 -16  -5    4.94    0.77
   0  16   5    5.37    0.76
  -1 -16  -5   16.22    1.04
   1  16   5   12.62    1.05
  -2 -16  -5   17.10    1.07
  -2 -16  -5   17.13    1.16
  -3 -16  -5    6.34    0.75
  -3 -16  -5    7.35    0.85
   3  16   5    6.17    0.66
  -4 -16  -5    4.81    0.73
  -4 -16  -5    1.99    0.54
   4  16   5    3.12    0.58
  -5 -16  -5    1.49    0.57
  -5 -16  -5    2.37    0.52
   5  16   5    1.43    0.54
  -6 -16  -5    9.12    0.91
  -6 -16  -5    9.81    0.84
   6  16   5    7.77    0.86
  -7 -16  -5    0.77    0.52
   7  16   5    0.28    0.53
  -8 -16  -5    0.42    0.51
   8  16   5    0.00    0.49
  -9 -16  -5    4.27    0.69
   9  16   5    2.91    0.71
  10  16   5   23.10    1.52
   5 -17  -5    2.23    0.74
  -5  17   5    1.38    0.71
   4 -17  -5    1.65    0.65
  -4  17   5    2.55    0.66
   3 -17  -5   13.30    1.21
  -3  17   5   10.37    1.08
   2 -17  -5   13.60    1.19
  -2  17   5   15.07    1.27
   1 -17  -5    0.98    0.62
  -1  17   5    1.84    0.64
   0 -17  -5    0.61    0.51
   0  17   5    1.07    0.62
  -1 -17  -5    9.36    0.90
   1  17   5    8.50    0.94
  -2 -17  -5    0.62    0.58
  -2 -17  -5   -0.17    0.50
  -3 -17  -5    9.95    1.00
  -3 -17  -5    9.90    0.93
  -4 -17  -5    0.30    0.50
  -4 -17  -5    1.36    0.52
   4  17   5    0.05    0.42
  -5 -17  -5   26.13    1.20
  -5 -17  -5   26.35    1.34
   5  17   5   27.01    1.32
  -6 -17  -5    1.15    0.59
   6  17   5    1.31    0.57
  -7 -17  -5    7.89    0.91
   7  17   5    5.94    0.87
  -8 -17  -5    4.47    0.76
   8  17   5    4.56    0.83
  -9 -17  -5   -0.17    0.50
   9  17   5    0.63    0.56
   4 -18  -5    2.68    0.75
  -4  18   5    2.31    0.71
   3 -18  -5    4.54    0.83
  -3  18   5    3.90    0.83
   2 -18  -5    4.00    0.81
  -2  18   5    3.12    0.80
   1 -18  -5   17.05    1.23
  -1  18   5   19.52    1.27
   0 -18  -5    8.77    0.96
   0  18   5   10.18    1.05
  -1 -18  -5   13.34    1.07
   1  18   5   12.26    1.16
  -2 -18  -5   44.04    1.74
  -2 -18  -5   50.87    1.95
  -3 -18  -5   -0.23    0.49
  -3 -18  -5    0.83    0.57
  -4 -18  -5   13.83    1.16
  -4 -18  -5   14.00    1.05
  -5 -18  -5   13.97    1.20
   5  18   5   15.91    1.08
  -6 -18  -5   45.47    1.86
   6  18   5   47.47    1.81
  -7 -18  -5    0.68    0.62
   7  18   5   -0.12    0.60
  -8 -18  -5   -0.47    0.56
   8  18   5    0.18    0.62
   2 -19  -5    2.66    0.79
  -2  19   5    2.12    0.71
   1 -19  -5   -0.31    0.54
  -1  19   5    0.40    0.58
   0 -19  -5    1.79    0.62
   0  19   5    1.49    0.68
  -1 -19  -5    6.41    0.85
   1  19   5    7.40    1.01
  -2 -19  -5    0.43    0.58
  -2 -19  -5   -0.31    0.54
  -3 -19  -5    9.39    1.05
  -3 -19  -5    7.32    0.83
  -4 -19  -5    4.90    0.70
  -4 -19  -5    1.75    0.65
  -5 -19  -5    3.30    0.77
  -6 -19  -5    4.46    0.83
   6  19   5    4.21    0.79
  -7 -19  -5    0.43    0.63
   7  19   5    0.44    0.62
   1 -20  -5    2.44    0.72
  -1  20   5    2.23    0.78
   0 -20  -5   -0.24    0.62
   0  20   5   -0.04    0.61
  -1 -20  -5    6.24    0.89
   1  20   5    5.09    0.93
  -2 -20  -5   18.02    1.19
   2  20   5   21.39    1.34
  -3 -20  -5   -0.26    0.61
  -3 -20  -5    1.21    0.62
  -4 -20  -5    1.92    0.72
  -5 -20  -5    1.20    0.70
  -6 -20  -5    0.88    0.65
   5  18  -6    0.36    0.62
  -5 -18   6   -0.21    0.57
   4  18  -6    0.87    0.64
  -4 -18   6    0.90    0.68
   3  18  -6    1.82    0.68
  -3 -18   6    1.85    0.78
   2  18  -6    0.21    0.55
  -2 -18   6    0.71    0.63
  -1 -18   6    0.19    0.54
   0 -18   6    2.31    0.72
   1 -18   6    1.57    0.75
   7  17  -6    0.67    0.69
  -7 -17   6   -0.06    0.63
   6  17  -6    4.86    0.86
  -6 -17   6    3.66    0.87
   5  17  -6   -1.13    0.47
  -5 -17   6   -0.40    0.56
   4  17  -6    6.16    0.90
  -4 -17   6    6.74    0.95
   3  17  -6    0.84    0.63
  -3 -17   6    1.07    0.63
   2  17  -6    0.51    0.55
  -2 -17   6    0.40    0.55
   1  17  -6    3.42    0.68
  -1 -17   6    2.77    0.74
   0 -17   6   25.53    1.48
   1 -17   6   -0.37    0.57
   2 -17   6    3.27    0.71
   2 -17   6    4.26    0.85
  -3  17  -6    0.32    0.57
   3 -17   6    0.08    0.59
   8  16  -6   -0.09    0.70
  -8 -16   6   -0.20    0.53
   7  16  -6   14.72    1.31
  -7 -16   6   10.68    1.17
   6  16  -6    2.29    0.75
  -6 -16   6    2.12    0.88
   5  16  -6    6.88    0.92
  -5 -16   6    6.91    0.97
   4  16  -6    6.46    0.88
  -4 -16   6    4.41    0.83
   3  16  -6    3.79    0.74
  -3 -16   6    2.75    0.69
   2  16  -6    1.58    0.58
  -2 -16   6    1.31    0.64
   1  16  -6    8.64    0.91
  -1 -16   6   10.12    1.07
   0  16  -6   10.27    0.94
   0 -16   6   11.96    1.11
   1 -16   6    0.20    0.54
   1 -16   6    0.31    0.51
   2 -16   6    2.28    0.68
   2 -16   6    1.84    0.68
  -3  16  -6    4.03    0.76
   3 -16   6    2.47    0.72
  -4  16  -6    0.12    0.55
   4 -16   6   -0.51    0.51
   9  15  -6    0.62    0.70
  -9 -15   6    0.45    0.64
   8  15  -6    1.80    0.70
  -8 -15   6    1.28    0.68
   7  15  -6    6.74    0.94
  -7 -15   6    3.43    0.76
   6  15  -6   -0.40    0.53
  -6 -15   6    0.20    0.54
   5  15  -6    5.99    0.88
  -5 -15   6    3.29    0.70
   4  15  -6   12.84    1.12
  -4 -15   6   12.85    1.13
   3  15  -6   15.01    1.07
  -3 -15   6   14.18    1.17
   2  15  -6    2.71    0.66
  -2 -15   6    3.56    0.72
   1  15  -6   14.15    1.06
  -1 -15   6   11.97    1.08
   0  15  -6    5.35    0.75
   0 -15   6    5.41    0.85
   0 -15   6    6.09    0.68
  -1  15  -6    8.05    0.83
   1 -15   6    8.49    0.85
   1 -15   6    9.06    0.99
   2 -15   6    0.24    0.55
   2 -15   6   -0.34    0.47
  -3  15  -6    0.48    0.48
   3 -15   6    0.17    0.54
  -4  15  -6    0.39    0.51
   4 -15   6    0.19    0.56
  -5  15  -6    0.59    0.58
   5 -15   6    0.72    0.64
   9  14  -6   -0.56    0.67
  -9 -14   6    0.43    0.64
   8  14  -6    2.71    0.74
  -8 -14   6    2.12    0.72
   7  14  -6   11.45    1.16
  -7 -14   6   12.36    1.17
   6  14  -6    1.83    0.63
  -6 -14   6    3.52    0.69
   5  14  -6    4.10    0.78
  -5 -14   6    4.26    0.74
   4  14  -6   47.00    1.78
  -4 -14   6   49.11    1.83
   3  14  -6    6.80    0.81
  -3 -14   6    4.14    0.71
   2  14  -6   12.49    1.01
  -2 -14   6   10.86    0.99
   1  14  -6    9.71    0.88
  -1 -14   6    9.47    0.94
   0  14  -6   18.49    1.07
   0 -14   6   18.04    0.99
   0 -14   6   18.04    1.18
  -1  14  -6    1.90    0.52
   1 -14   6    3.21    0.65
   1 -14   6    2.74    0.59
  -2  14  -6    3.75    0.65
   2 -14   6    2.82    0.68
   2 -14   6    3.66    0.69
   3 -14   6    0.11    0.52
   3 -14   6   -1.18    0.46
  -4  14  -6    2.48    0.64
   4 -14   6    1.23    0.61
  -5  14  -6    2.49    0.66
   5 -14   6    1.95    0.64
  -6  14  -6    0.23    0.52
   6 -14   6    0.04    0.58
  10  13  -6    9.13    1.15
 -10 -13   6    6.34    0.89
   9  13  -6    1.65    0.70
  -9 -13   6    1.85    0.67
   8  13  -6    4.57    0.88
  -8 -13   6    4.71    0.80
   7  13  -6   11.04    1.09
  -7 -13   6    9.07    0.96
   6  13  -6    9.16    0.99
  -6 -13   6    8.01    0.92
   5  13  -6   11.39    1.00
  -5 -13   6   10.74    1.01
   4  13  -6    8.21    0.89
  -4 -13   6    8.37    0.87
   3  13  -6   27.38    1.34
  -3 -13   6   27.05    1.31
   2  13  -6    2.01    0.57
  -2 -13   6    2.32    0.57
   1  13  -6    3.25    0.61
  -1 -13   6    2.24    0.60
  -1 -13   6    2.70    0.48
   0  13  -6   28.06    1.30
   0 -13   6   27.55    1.30
   0 -13   6   32.66    1.23
  -1  13  -6    0.34    0.47
   1 -13   6    0.92    0.55
   1 -13   6   -0.06    0.41
   2 -13   6    8.30    0.77
   2 -13   6    7.18    0.85
   2 -13   6    8.24    0.82
   3 -13   6   14.21    0.87
   3 -13   6   14.59    1.13
   3 -13   6   14.84    1.03
  -4  13  -6    0.90    0.54
   4 -13   6    2.09    0.66
  -5  13  -6    0.82    0.55
   5 -13   6   -0.56    0.52
  -6  13  -6    3.39    0.67
   6 -13   6    1.75    0.68
  10  12  -6    4.15    0.91
 -10 -12   6    4.72    0.86
   9  12  -6    4.48    0.86
  -9 -12   6    6.02    0.91
   8  12  -6   -0.24    0.52
  -8 -12   6    0.08    0.53
   7  12  -6    4.40    0.79
  -7 -12   6    3.14    0.72
   6  12  -6    2.07    0.60
  -6 -12   6    2.15    0.63
   5  12  -6    3.15    0.62
  -5 -12   6    3.35    0.67
   4  12  -6   20.38    1.12
  -4 -12   6   18.50    1.11
   3  12  -6    2.89    0.63
  -3 -12   6    2.44    0.57
   2  12  -6   20.24    1.11
  -2 -12   6   19.94    1.08
   1  12  -6    0.15    0.43
  -1 -12   6    0.56    0.32
  -1 -12   6    0.08    0.45
   0  12  -6    1.75    0.50
   0 -12   6    1.39    0.41
   0 -12   6    1.26    0.50
   1 -12   6    0.97    0.51
   1 -12   6    0.63    0.44
   1 -12   6    0.37    0.40
   2 -12   6   37.71    1.45
   2 -12   6   35.77    1.33
   2 -12   6   35.43    1.45
   3 -12   6    2.09    0.49
   3 -12   6    1.25    0.53
   3 -12   6    1.75    0.57
  -4  12  -6    9.56    0.89
   4 -12   6    9.84    0.98
   4 -12   6    9.96    0.82
  -5  12  -6    1.91    0.57
   5 -12   6    0.72    0.56
  -6  12  -6    0.02    0.46
   6 -12   6    0.21    0.60
   7 -12   6    2.24    0.78
  11  11  -6   -0.10    0.63
 -11 -11   6    1.31    0.68
  10  11  -6    2.22    0.74
 -10 -11   6    3.19    0.78
   9  11  -6    2.44    0.75
  -9 -11   6    2.49    0.67
   8  11  -6    1.02    0.63
  -8 -11   6    2.19    0.64
   7  11  -6    4.08    0.74
  -7 -11   6    7.10    0.83
   6  11  -6   18.94    1.13
  -6 -11   6   17.80    1.18
   5  11  -6    5.45    0.76
  -5 -11   6    6.94    0.79
   4  11  -6    0.65    0.47
  -4 -11   6    1.55    0.48
   3  11  -6    4.97    0.69
  -3 -11   6    4.75    0.65
   2  11  -6   20.05    1.05
  -2 -11   6   21.94    0.79
  -2 -11   6   20.66    1.11
   1  11  -6   54.20    1.70
  -1 -11   6   52.40    1.46
  -1 -11   6   55.10    1.77
   0  11  -6  134.69    3.24
   0 -11   6  136.30    3.27
   0 -11   6  136.25    3.09
   1 -11   6    4.13    0.61
   1 -11   6    4.54    0.58
   1 -11   6    3.92    0.56
   2 -11   6    0.80    0.48
   2 -11   6   -0.26    0.36
   2 -11   6    0.09    0.42
   3 -11   6   58.66    1.78
   3 -11   6   61.04    1.96
   3 -11   6   57.56    1.86
  -4  11  -6    0.36    0.44
   4 -11   6    1.02    0.45
   4 -11   6    0.46    0.48
  -5  11  -6   -0.40    0.44
   5 -11   6   -1.01    0.37
   5 -11   6    0.59    0.57
  -6  11  -6    8.45    0.80
   6 -11   6    6.34    0.91
   7 -11   6   10.48    1.16
   8 -11   6    0.67    0.64
  11  10  -6    1.48    0.82
 -11 -10   6    1.99    0.70
  10  10  -6    3.22    0.82
 -10 -10   6    3.65    0.77
   9  10  -6   -0.15    0.59
  -9 -10   6    0.14    0.50
   8  10  -6    7.43    0.92
  -8 -10   6    7.97    0.93
   7  10  -6   11.10    0.99
  -7 -10   6   12.65    1.03
  -6 -10   6    2.36    0.55
   5  10  -6    5.85    0.76
  -5 -10   6    6.73    0.75
   4  10  -6    9.90    0.84
  -4 -10   6   10.11    0.88
   3  10  -6    3.65    0.58
  -3 -10   6    4.06    0.60
   2  10  -6    7.02    0.72
  -2 -10   6    6.84    0.47
  -2 -10   6    5.06    0.62
   1  10  -6   15.99    0.94
  -1 -10   6   14.85    0.93
  -1 -10   6   15.69    0.72
   0 -10   6    6.11    0.63
   0 -10   6    6.70    0.69
   0 -10   6    6.06    0.56
   1 -10   6   13.66    0.84
   1 -10   6   12.11    0.81
   1 -10   6   13.99    0.81
   2 -10   6    5.04    0.61
   2 -10   6    6.48    0.68
   2 -10   6    6.18    0.67
   3 -10   6    1.74    0.50
   3 -10   6    2.56    0.58
   3 -10   6    1.88    0.47
  -4  10  -6   15.05    0.91
   4 -10   6   15.08    0.99
   4 -10   6   15.27    0.90
  -5  10  -6   -0.16    0.40
   5 -10   6   -0.19    0.36
   5 -10   6    0.33    0.54
  -6  10  -6    0.66    0.49
   6 -10   6    1.14    0.46
   6 -10   6    1.11    0.62
   7 -10   6   13.91    1.23
   8 -10   6    2.22    0.83
  11   9  -6    0.61    0.65
 -11  -9   6    0.11    0.57
  10   9  -6    0.17    0.64
 -10  -9   6    1.90    0.61
   9   9  -6   17.94    1.22
  -9  -9   6   14.77    1.16
   8   9  -6    0.50    0.52
  -8  -9   6    0.59    0.50
   7   9  -6   -0.30    0.45
  -7  -9   6    0.90    0.53
   6   9  -6   33.33    1.42
  -6  -9   6   32.71    1.37
   5   9  -6   12.28    0.94
  -5  -9   6   12.36    0.86
   4   9  -6    8.43    0.77
  -4  -9   6    9.41    0.82
   3   9  -6    2.70    0.50
  -3  -9   6    2.13    0.49
   2   9  -6    5.68    0.64
  -2  -9   6    7.08    0.44
  -2  -9   6    5.83    0.63
   1   9  -6   31.23    1.21
  -1  -9   6   31.19    1.17
  -1  -9   6   29.77    0.95
   0  -9   6   43.93    1.28
   0  -9   6   41.63    1.38
   0  -9   6   41.55    1.39
   1  -9   6    0.10    0.33
   1  -9   6   -0.07    0.34
   1  -9   6   -0.11    0.33
   2  -9   6    0.42    0.36
   2  -9   6    0.44    0.40
   2  -9   6    0.79    0.40
   3  -9   6   10.80    0.76
   3  -9   6   11.47    0.89
   3  -9   6    9.70    0.75
  -4   9  -6    5.96    0.64
   4  -9   6    5.58    0.73
   4  -9   6    5.30    0.61
  -5   9  -6    4.49    0.59
   5  -9   6    4.87    0.62
   5  -9   6    3.69    0.68
  -6   9  -6   30.77    1.27
   6  -9   6   28.44    1.24
   6  -9   6   30.73    1.47
   7  -9   6   -0.77    0.48
   8  -9   6    0.23    0.64
   9  -9   6    4.12    0.90
  11   8  -6    0.50    0.70
 -11  -8   6    1.19    0.56
  10   8  -6   10.98    1.11
 -10  -8   6    9.92    0.99
   9   8  -6    0.09    0.50
  -9  -8   6    0.19    0.50
   8   8  -6    2.59    0.65
  -8  -8   6    4.00    0.69
   7   8  -6    2.74    0.60
  -7  -8   6    3.03    0.58
   6   8  -6   10.55    0.89
  -6  -8   6   10.53    0.89
   5   8  -6   10.38    0.85
  -5  -8   6    7.58    0.73
   4   8  -6   12.20    0.90
  -4  -8   6   12.12    0.87
   3   8  -6   33.93    1.26
  -3  -8   6   33.92    1.25
   2   8  -6    7.03    0.66
  -2  -8   6    6.66    0.63
  -2  -8   6    6.88    0.39
   1   8  -6   -0.07    0.33
  -1  -8   6   -0.01    0.24
  -1  -8   6    0.46    0.34
  -1  -8   6    0.36    0.36
   0  -8   6    1.71    0.42
   0  -8   6    1.18    0.39
   0  -8   6    1.72    0.35
   1  -8   6    0.43    0.30
   1  -8   6    0.36    0.34
   1  -8   6    0.11    0.30
   2  -8   6    2.04    0.41
   2  -8   6    1.56    0.43
   2  -8   6    2.14    0.43
   3  -8   6   56.42    1.61
   3  -8   6   56.96    1.72
   3  -8   6   54.47    1.63
  -4   8  -6    0.32    0.38
   4  -8   6   -0.04    0.46
   4  -8   6    0.06    0.37
  -5   8  -6    2.55    0.47
   5  -8   6    4.04    0.57
   5  -8   6    3.12    0.62
  -6   8  -6   35.41    1.31
   6  -8   6   34.94    1.58
   6  -8   6   32.75    1.30
   7  -8   6   19.22    1.06
   7  -8   6   17.52    1.21
   8  -8   6    6.88    0.96
   9  -8   6    8.75    1.05
  11   7  -6    0.55    0.71
 -11  -7   6    2.17    0.72
  10   7  -6    3.90    0.77
 -10  -7   6    3.64    0.72
   9   7  -6    0.75    0.53
  -9  -7   6    0.40    0.50
   8   7  -6    1.63    0.55
  -8  -7   6    1.94    0.59
   7   7  -6   -0.35    0.42
  -7  -7   6    0.25    0.42
   6   7  -6   14.05    0.95
  -6  -7   6   13.19    0.91
   5   7  -6    0.84    0.41
  -5  -7   6    0.87    0.40
   4   7  -6    0.83    0.44
  -4  -7   6    0.91    0.40
   3   7  -6   30.60    1.18
  -3  -7   6   33.32    1.21
   2   7  -6   -0.06    0.34
   2   7  -6    0.12    0.19
  -2  -7   6    0.22    0.33
  -1  -7   6    3.24    0.45
  -1  -7   6    3.48    0.50
  -1  -7   6    3.74    0.35
   0  -7   6  118.59    2.64
   0  -7   6  110.93    2.52
   0  -7   6  114.83    2.69
   1  -7   6    4.14    0.48
   1  -7   6    4.05    0.49
   1  -7   6    3.65    0.45
   2  -7   6    1.87    0.41
   2  -7   6    1.80    0.41
   2  -7   6    2.85    0.46
   3  -7   6    0.29    0.33
   3  -7   6    0.23    0.35
   3  -7   6    0.14    0.38
  -4   7  -6   46.42    1.41
   4  -7   6   45.04    1.45
   4  -7   6   48.09    1.63
  -5   7  -6    1.46    0.40
   5  -7   6    1.36    0.45
   5  -7   6    1.05    0.52
  -6   7  -6    9.59    0.75
   6  -7   6    9.51    0.79
   6  -7   6    8.91    0.89
   7  -7   6    1.17    0.63
   7  -7   6    1.35    0.49
   8  -7   6   -0.43    0.43
   8  -7   6    0.45    0.58
   9  -7   6    4.98    0.97
  10  -7   6    3.14    0.86
  12   6  -6    2.76    0.80
 -12  -6   6    3.60    0.79
  11   6  -6    6.12    0.96
 -11  -6   6    4.78    0.83
  10   6  -6   11.86    1.09
 -10  -6   6   12.82    1.10
   9   6  -6    3.08    0.68
  -9  -6   6    1.90    0.60
   8   6  -6    0.38    0.49
  -8  -6   6    1.52    0.50
   7   6  -6   20.61    1.10
  -7  -6   6   20.83    1.07
   6   6  -6    0.38    0.40
  -6  -6   6   -0.28    0.38
   5   6  -6    0.78    0.38
  -5  -6   6    0.92    0.40
   4   6  -6   -0.26    0.34
  -4  -6   6   -0.07    0.32
   3   6  -6    1.64    0.42
  -3  -6   6    1.40    0.39
   2   6  -6   34.93    0.84
   2   6  -6   33.90    1.18
  -2  -6   6   35.38    1.19
  -1  -6   6    2.89    0.31
  -1  -6   6    3.02    0.42
  -1  -6   6    3.02    0.43
   0  -6   6    0.36    0.34
   0  -6   6    0.58    0.32
   0  -6   6   -0.03    0.24
   1  -6   6   -0.26    0.33
   1  -6   6   -0.05    0.27
   1  -6   6    0.34    0.30
   2  -6   6    0.10    0.30
   2  -6   6    0.29    0.30
   2  -6   6    0.41    0.30
   3  -6   6   31.43    1.21
   3  -6   6   33.95    1.17
   3  -6   6   33.61    1.07
  -4   6  -6    1.28    0.34
   4  -6   6    1.71    0.39
   4  -6   6    1.20    0.44
  -5   6  -6   29.35    1.05
   5  -6   6   28.71    1.15
   5  -6   6   31.10    1.34
  -6   6  -6    0.05    0.36
   6  -6   6   -0.08    0.48
   6  -6   6    0.69    0.43
   7  -6   6    0.18    0.41
   7  -6   6   -0.25    0.49
   8  -6   6    5.83    0.85
   8  -6   6    5.95    0.74
   9  -6   6    1.75    0.72
   9  -6   6    4.02    0.66
  10  -6   6    5.23    0.94
  12   5  -6    1.07    0.64
 -12  -5   6    0.26    0.59
  11   5  -6    0.61    0.67
 -11  -5   6    0.65    0.58
  10   5  -6    5.10    0.84
 -10  -5   6    3.74    0.74
   9   5  -6    5.58    0.77
  -9  -5   6    6.12    0.83
   8   5  -6    5.89    0.73
  -8  -5   6    4.74    0.68
   7   5  -6    3.78    0.61
  -7  -5   6    3.07    0.57
   6   5  -6   24.12    1.10
  -6  -5   6   24.45    1.13
   5   5  -6    0.21    0.35
  -5  -5   6   -0.13    0.35
   4   5  -6    7.37    0.65
  -4  -5   6    7.33    0.66
   3   5  -6  130.82    3.01
  -3  -5   6  132.22    2.95
   2   5  -6    2.64    0.43
   2   5  -6    3.81    0.26
  -2  -5   6    3.65    0.48
   1   5  -6    3.02    0.31
  -1  -5   6    2.67    0.41
  -1  -5   6    2.29    0.38
   0  -5   6   23.40    0.78
   0  -5   6   21.93    0.85
   1  -5   6   38.12    1.21
   1  -5   6   37.24    1.12
   1  -5   6   37.73    1.10
   2  -5   6    4.48    0.48
   2  -5   6    4.98    0.50
   2  -5   6    5.07    0.46
   3  -5   6   55.44    1.54
   3  -5   6   53.92    1.59
   3  -5   6   53.40    1.39
  -4   5  -6    7.66    0.55
   4  -5   6    6.99    0.67
   4  -5   6    8.49    0.67
  -5   5  -6    0.53    0.32
   5  -5   6    0.69    0.42
   5  -5   6    0.11    0.34
  -6   5  -6   11.78    0.72
   6  -5   6   12.31    0.97
   6  -5   6   12.35    0.83
   7  -5   6    3.06    0.55
   7  -5   6    3.44    0.66
   8  -5   6    0.92    0.56
   8  -5   6    1.24    0.54
   9  -5   6   13.28    1.18
   9  -5   6   15.97    1.05
  10  -5   6   -0.26    0.63
  10  -5   6   -0.24    0.47
  12   4  -6    8.27    1.03
 -12  -4   6    6.07    0.90
  11   4  -6    0.81    0.62
 -11  -4   6   -0.28    0.58
  10   4  -6   17.28    1.20
 -10  -4   6   18.73    1.21
   9   4  -6    1.25    0.53
  -9  -4   6    0.36    0.47
   8   4  -6    0.15    0.50
  -8  -4   6    0.51    0.49
   7   4  -6    9.37    0.82
  -7  -4   6   10.27    0.88
   6   4  -6    0.83    0.20
   6   4  -6    0.85    0.39
  -6  -4   6    0.97    0.39
   5   4  -6    2.36    0.46
   5   4  -6    2.39    0.20
  -5  -4   6    2.30    0.47
   4   4  -6   79.47    2.06
  -4  -4   6   79.19    2.05
   3   4  -6    4.27    0.50
  -3  -4   6    4.10    0.49
   2   4  -6    1.56    0.37
   2   4  -6    1.81    0.20
  -2  -4   6    1.05    0.33
   1   4  -6    1.46    0.25
  -1  -4   6    1.56    0.35
  -1  -4   6    0.86    0.32
   0   4  -6   16.18    0.64
   0  -4   6   16.24    0.71
   0  -4   6   16.64    0.80
   1  -4   6    9.04    0.58
   1  -4   6    9.81    0.56
   1  -4   6    8.43    0.62
   2  -4   6   42.05    1.25
   2  -4   6   40.77    1.09
   2  -4   6   41.34    1.26
   3  -4   6    4.89    0.51
   3  -4   6    5.42    0.52
   3  -4   6    5.55    0.42
  -4   4  -6    0.34    0.26
   4  -4   6   -0.24    0.32
   4  -4   6    0.20    0.35
  -5   4  -6   11.88    0.60
   5  -4   6   12.74    0.90
   5  -4   6   12.15    0.81
  -6   4  -6    1.39    0.33
   6  -4   6    1.04    0.43
   6  -4   6    0.63    0.48
   7  -4   6    0.29    0.43
   7  -4   6   -0.39    0.46
   8  -4   6   16.23    1.13
   8  -4   6   17.29    1.05
   9  -4   6    0.96    0.62
   9  -4   6    1.27    0.53
  10  -4   6    1.01    0.49
  10  -4   6    0.43    0.65
  11  -4   6    0.69    0.55
  11  -4   6    0.44    0.63
  12   3  -6    4.38    0.86
 -12  -3   6    5.01    0.88
  11   3  -6    2.01    0.68
 -11  -3   6    3.54    0.76
  10   3  -6    2.77    0.72
 -10  -3   6    3.04    0.65
   9   3  -6    5.60    0.77
  -9  -3   6    4.37    0.70
   8   3  -6    0.89    0.45
  -8  -3   6    1.59    0.56
   7   3  -6   23.78    0.81
   7   3  -6   25.54    1.17
  -7  -3   6   21.58    1.10
   6   3  -6   72.39    1.99
   6   3  -6   68.63    1.59
  -6  -3   6   71.95    2.01
   5   3  -6    0.69    0.38
   5   3  -6    0.80    0.21
  -5  -3   6    0.27    0.38
   4   3  -6    4.28    0.30
   4   3  -6    3.07    0.45
  -4  -3   6    4.22    0.51
   3   3  -6  272.73    5.48
   3   3  -6  269.17    5.09
  -3  -3   6  268.81    5.40
   2   3  -6   39.59    0.92
  -2  -3   6   38.98    1.18
  -2  -3   6   40.67    1.19
   1   3  -6   42.45    1.04
  -1  -3   6   42.13    1.18
  -1  -3   6   42.87    1.26
   0   3  -6   54.48    1.33
   0  -3   6   54.78    1.48
   0  -3   6   55.08    1.34
  -1   3  -6   10.47    0.56
   1  -3   6   10.05    0.62
   1  -3   6   10.95    0.53
   2  -3   6    0.23    0.21
   2  -3   6    0.15    0.28
   2  -3   6    0.05    0.31
   3  -3   6   97.85    2.06
   3  -3   6   95.84    2.36
   3  -3   6  100.68    2.33
  -4   3  -6   11.66    0.52
   4  -3   6   11.26    0.74
   4  -3   6   11.00    0.73
  -5   3  -6    5.28    0.42
   5  -3   6    5.82    0.67
   5  -3   6    5.54    0.59
  -6   3  -6   60.09    1.46
   6  -3   6   55.27    1.82
   6  -3   6   58.49    1.76
   7  -3   6    1.90    0.50
   7  -3   6    2.15    0.60
   8  -3   6    1.46    0.56
   8  -3   6    1.04    0.50
   9  -3   6    4.96    0.73
   9  -3   6    5.78    0.87
  10  -3   6   -0.20    0.61
  10  -3   6   -0.12    0.48
 -11   3  -6   15.43    1.37
  11  -3   6   17.06    1.15
  12   2  -6    0.54    0.58
 -12  -2   6    1.30    0.67
  11   2  -6    1.87    0.60
 -11  -2   6    0.13    0.57
  10   2  -6    4.95    0.72
 -10  -2   6    3.11    0.68
   9   2  -6    1.18    0.54
  -9  -2   6    1.09    0.55
   8   2  -6    1.13    0.36
   8   2  -6    1.03    0.45
  -8  -2   6    2.10    0.57
   7   2  -6    2.08    0.38
   7   2  -6    1.44    0.43
  -7  -2   6    1.53    0.53
   6   2  -6    0.05    0.25
   6   2  -6    0.43    0.38
  -6  -2   6    0.06    0.38
   5   2  -6   54.27    1.31
   5   2  -6   56.46    1.59
  -5  -2   6   54.46    1.61
   4   2  -6   35.88    0.90
   4   2  -6   34.58    1.17
  -4  -2   6   36.40    1.18
   3   2  -6   14.68    0.71
   3   2  -6   14.66    0.51
  -3  -2   6   15.06    0.73
   2   2  -6    0.37    0.19
  -2  -2   6   -0.03    0.29
  -2  -2   6   -0.50    0.26
   1   2  -6    0.21    0.22
  -1  -2   6    0.36    0.31
  -1  -2   6    0.03    0.27
   0   2  -6  220.51    4.37
   0  -2   6  222.70    4.30
  -1   2  -6   92.44    2.09
   1  -2   6   95.50    1.94
   1  -2   6   90.69    2.13
  -2   2  -6   30.04    0.99
   2  -2   6   30.49    0.78
   2  -2   6   30.20    1.01
  -3   2  -6    0.03    0.18
   3  -2   6    0.18    0.31
   3  -2   6    0.06    0.32
  -4   2  -6   20.61    0.64
   4  -2   6   21.36    0.93
   4  -2   6   20.23    0.88
  -5   2  -6    6.31    0.40
   5  -2   6    6.95    0.63
   5  -2   6    6.39    0.66
  -6   2  -6    0.43    0.23
   6  -2   6    0.41    0.43
   6  -2   6    0.46    0.38
   7  -2   6    7.10    0.72
   7  -2   6    5.60    0.71
   8  -2   6    1.04    0.49
   8  -2   6    0.85    0.49
   9  -2   6    0.70    0.49
   9  -2   6   -0.50    0.48
 -10   2  -6    0.01    0.57
  10  -2   6    0.16    0.83
 -11   2  -6    2.04    0.71
  11  -2   6    1.96    0.62
  12   1  -6   10.19    1.03
 -12  -1   6   10.51    1.12
  11   1  -6    0.90    0.51
 -11  -1   6    1.00    0.60
  10   1  -6   -0.09    0.47
 -10  -1   6   -0.20    0.50
   9   1  -6   36.66    1.48
   9   1  -6   35.45    1.32
  -9  -1   6   36.21    1.56
   8   1  -6   20.69    1.08
   8   1  -6   22.07    0.98
  -8  -1   6   23.63    1.21
   7   1  -6    2.86    0.43
   7   1  -6    2.54    0.50
  -7  -1   6    3.10    0.60
   6   1  -6   26.62    0.91
   6   1  -6   29.02    1.11
  -6  -1   6   27.59    1.18
   5   1  -6   17.52    0.70
   5   1  -6   16.19    0.78
  -5  -1   6   17.58    0.88
   4   1  -6    0.68    0.31
   4   1  -6    0.96    0.25
  -4  -1   6    1.32    0.39
   3   1  -6   22.96    0.69
   3   1  -6   21.79    0.83
  -3  -1   6   22.54    0.87
   2   1  -6    0.33    0.22
  -2  -1   6   -0.06    0.26
  -2  -1   6    0.06    0.27
   1   1  -6   72.37    1.61
[truncated: 1,199,193 more chars]
